# Supplementary material for: Anti-schistosomal Intervention Targets Identified by Lifecycle Transcriptomic Analyses
Source: PLoS Negl Trop Dis. 2009 Nov 3;3(11):e543. doi: 10.1371/journal.pntd.0000543 (PMC2764848; doi:10.1371/journal.pntd.0000543)
Supplement: Dataset S4 — Normalised AF647 fluorescent intensity values of each oligonucleotide representation on the DNA microarray across the schistosome lifecycle. Normalisation procedures are described in the Methods. Replicate lifecycle stages are colour coded. ‘Name’ column header represents the oligonucleotide identifier. ‘Block, column, row and ID’ represent physical location of each 50-mer oligonucleotide on the DNA microarray. (33.74 MB XLS) [file pntd.0000543.s004.xls]

## Sheet: Norm AF647 Fluorescence
						EGG (UT01)			Miracidia (UT02)			2 Day Sporocysts (UT03)			Daughter Sporocysts (UT04)			Cercariae (UT05)			3hr somules (UT06)			24hr somules (UT07)			3day somules (UT08)			6day somules (UT09)			2wk worms (UT10)			3wk worms (UT11)			5wk worms (UT12)			7wk worms (UT13)			7wk males (UT14)			7wk females (UT15)
Block	Column	Row	ID	Name	SmV2_08_870730_output	SmV2_09_870730_output	SmV2_10_870730_output	SmV2_89_870730_output	SmV2_90_870730_output	SmV2_91_870730_output	SmV2_86_870730_output	SmV2_87_870730_output	SmV2_88_870730_output	SmV2_83_870730_output	SmV2_84_870730_output	SmV2_85_870730_output	SmV2_20_870730_output	SmV2_21_870730_output	SmV2_22_870730_output	SmV2_17_870730_output	SmV2_18_870730_output	SmV2_19_870730_output	SmV2_11_870730_output	SmV2_12_870730_output	SmV2_13_870730_output	SmV2_05_870730_output	SmV2_06_870730_output	SmV2_07_870730_output	SmV2_14_870730_output	SmV2_15_870730_output	SmV2_16_870730_output	SmV2_92_870730_output	SmV2_93_870730_output	SmV2_94_870730_output	SmV2_23_870730_output	SmV2_24_870730_output	SmV2_76_870730_output	SmV2_77_870730_output	SmV2_78_870730_output	SmV2_79_870730_output	SmV2_80_870730_output	SmV2_81_870730_output	SmV2_82_870730_output	SmV2_98_870730_output	SmV2_99_870730_output	SmV2_100_870730_output	SmV2_95_870730_output	SmV2_97_870730_output
1	1	1	90A24	SMLC6A03	1833.14	2073.1	1591.72	689.006	858.365	1780.66	3029.96	3556.97	2244.52	1619.01	1189.01	1454.93	3353.92	1382.09	674.204	1718.21	2220.77	859.608	26812.8	1603.91	5191.94	3085.12	4003.67	5078.09	2648.28	2680.29	2254.3	4543.75	3765.53	5003.75	6829.27	3242.52	5394.28	1270.75	1593.67	759.153	1112.15	5818.65	1874.87	2636.62	1916.39	1502.31	1335.25	1568.31
1	2	1	9e+25	CL77	277.126	394.178	420.969	62.6058	381.716	167.931	462.862	634.45	477.97	499.519	585.894	457.776	3430.12	878.553	426.371	775.471	1068.25	356.261	634.519	200.065	1060.49	545.089	1172.42	1295.33	485.426	640.827	580.359	517.678	290.713	524.807	3768.86	2054.42	1221.99	1515.79	1892.51	1486.12	389.148	1132.23	680.776	434.561	297.446	238.695	193.239	894.421
1	3	1	90I24	CL194	1076.6	636.315	608.814	197.922	231.932	53.6058	172.071	207.197	99.7316	4202.99	5448.29	2582.05	19620.4	8075.98	2316.51	89311.2	67312.3	63916.3	7724.8	4338.76	13066.1	10426	12472	16293.7	303.775	235.77	283.891	155.592	87.331	45.2784	81.412	77.0146	346.874	197.776	142.314	202.438	123.349	325.842	229.444	271.811	90.9088	67.1986	90.4955	380.23
1	4	1	90M24	CL304	14759.5	18396.1	12531	8740.81	9482.54	15574.3	27747.8	33960.4	27223.7	4538.12	2980.44	4302.51	42619.7	16406	4671.34	23176	29005.7	10816.6	39661.9	18503.2	49344.8	27349.2	48707.8	56755.4	27406.4	28423.9	28962.4	24386.7	14943.9	28021.4	58793	42402.4	28538	14646.6	25930.9	15823.4	4922.86	22957.1	9573.56	37750.7	25616	7861.11	13767.1	14670.9
1	5	1	91A12	CL388	56715.7	97212.2	74365.1	56756.4	70056.7	85751.3	57789	67158.4	57965.1	53724.6	50853.2	62623.1	88153	53476.1	51271.2	89270.9	81221.8	59208.5	55703.4	49610	48225.6	47127.8	59203.8	61283.5	84544.1	71147.6	70387.3	58698	59882.1	54998.5	63032.6	41433.9	68595.8	85427.4	66080.8	66729.2	58097.6	72285.5	78434.1	58672	60008.6	54570.5	79588.5	66384.8
1	6	1	91000000000000	CL488	2690.53	3340.88	2517.94	683.241	1127.98	1212.12	5655.57	6762.94	4456.45	5612.77	4408.9	5930.01	3249.47	1527.91	741.95	2725.11	3607.07	1254.29	2905.92	1749.51	4704.82	5036.74	6319.4	7676.83	4386.13	4398.11	4629.08	16202.6	11992.9	20468.8	31577.7	14621.3	15784.2	10023.2	15451	8601.86	1560.66	5106.36	2716.35	43933.9	36528.9	10677	1338.33	1435.33
1	7	1	91I12	CL590	15.7801	19.4128	82.1152	57.4003	225.159	78.0649	211.721	559.266	154.683	929.453	824.848	841.319	56.1305	95.7064	144.45	451.176	713.887	281.952	46.6235	92.1536	90.1885	42.8416	42.2419	23.6729	90.1558	181.179	37.0904	135.147	333.357	166.846	17.9496	57.7475	24.8811	222.585	158.282	106.904	76.988	217.376	148.039	100.908	22.0479	157.37	142.178	219.58
1	8	1	91M12	CL689	26661.1	30379.9	23821.4	584.433	943.324	1503.35	2900.72	3457.11	2292.3	1258.09	1422.51	1388.52	5524.91	2637.56	1392.49	4669.52	5536.3	2643.32	2728.17	2008.65	4009.08	3574.69	3845.67	4773.4	2276.75	2039.79	1296.05	1175.94	1181.77	1442.63	3757.32	1314.58	3624.02	1317.58	2362.97	1253.26	610	1554.85	1271.26	1076	935.471	943.315	993.662	777.552
1	9	1	91A24	CL400	2634.55	2901.34	2180	338.701	555.265	415.296	2137.55	2002.87	1528.43	531.214	613.824	580.939	593.423	418.727	270.366	383.008	516.623	251.173	317.339	603.853	435.607	609.838	705.919	719.408	364.028	289.14	215.663	271.744	240.794	300.989	2230.64	982.418	766.366	304.772	258.383	244.449	106.91	415.206	316.063	130.625	206.426	158.232	581.121	243.03
1	10	1	9.1e+25	CL500	1492.44	1627.81	941.085	833.377	1903.23	1560.08	7658.56	7383.84	4701.75	2624.46	1784.68	4024.14	28325.7	13786.3	7515.34	27743.4	45115.9	16895.3	13616.7	7632.04	17024.7	23918.6	26176.7	33558.7	12555.4	17923.9	17513.7	7538.43	5812.19	8578.29	30867.9	15155.8	25106	12849.9	17185.9	9493.95	24803.8	43028.1	29433.6	28685.3	34395.6	21993.9	3005.76	4279.44
1	11	1	91I24	CL602	1292.27	1732.72	939.889	896.509	2253.79	1537.37	5670.12	6051.67	4305.94	1953.52	2033.3	3548.66	3546.69	1498.01	674.873	966.646	1865.5	442.077	1966.48	1191.62	3729.21	5636.03	6788.54	8269.03	3491.32	5424.11	5884.57	5114.8	3617.73	5965.7	28591.1	12452.4	14707.8	3342.04	4483.3	2213.16	5157.89	19382.9	9226.66	7244.39	6727.3	4899.35	5268.3	5706.13
1	12	1	91M24	CL703	1939.84	2722.07	1759.16	1050.05	2573.73	2323.41	4125.43	5437	3457.21	1502.89	1305.64	1953.85	9007.39	5632.04	2354.41	3387.58	5158.38	1311.94	3484.24	1814.68	5585.59	4594.38	5852.79	7554.85	3846.22	3499.43	3069.77	2353.5	2417.55	2703.43	12025.5	4818.43	6994.54	1920.25	2429.27	1560.39	985.723	3701.61	2262.05	1414.54	1566.34	1700.74	1998.67	2241.04
1	13	1	92A12	CL764	3573.4	5218.98	3996.11	369.349	888.198	912.387	1146.64	1714.5	1214.07	1501.71	1833.54	2402.75	1990.68	1292.25	546.615	1532.95	2442.94	778.635	1820.63	801.965	2578.95	1533.73	2053.95	2514.94	1216.99	974.074	593.415	1032.79	949.873	1119.51	2289.82	895.645	1686.44	673.832	713.161	529.892	243.826	901.875	614.668	849.645	671.891	721.603	480.505	207.433
1	14	1	92000000000000	CL869	62912.2	75963.8	67957.5	1324.56	2792.87	2440.31	3846.63	9021.73	5295.3	2708.2	4042.69	4994.43	18675.6	13745.5	4215.28	12324	21657.5	10815.2	5944.78	5194.43	9429.18	12595.3	14849.3	14966.9	5114.4	6882.05	5397.07	4085.92	3152.34	4324.77	11963.7	6540.82	7396.11	4730.69	5618.2	3258.88	1435.65	4114.08	1868.32	5472.95	3857.72	2384.14	2915.3	3278.54
1	15	1	92I12	CL987	6425.44	10121	6717.22	5156.27	11425.6	11827.3	11211.2	17290.1	13046.8	4206.35	4646.74	5264.13	7713.01	6454.13	2112.94	5981.89	7968.41	3222.11	12426.8	5524.19	14770.5	13581.1	16646.4	19270.9	11093.7	12143.8	11926.6	7270.45	5149.94	8517.86	32076.1	12472	17886.6	4343.35	6077.97	3199.84	4945.63	24199	10018	10466.8	8997.01	6639.48	15206.1	16559.2
1	16	1	92M12	CL1103	2179.23	2533.87	2165.83	1855.92	4988.73	4756.01	2141.07	4188.31	2806.85	4097.6	4487.48	5605.89	30147.8	24850.5	11872.7	17252.5	31521.8	10060.9	13040.1	5707.79	19388.5	13156.9	16349.3	16607.6	13615.4	15630.4	14399.8	2491.24	3212.46	3218.33	12595.5	5778.83	11083.5	2576.31	2811.14	1634.22	5885.32	26705.2	13396.2	5192.19	5066.94	4212.36	3164.43	3953.29
1	17	1	92A24	CL776	548.017	647.76	411.511	236.086	838.223	691.204	1305.09	2242.94	1527.51	542.28	318.164	767.115	742.364	516.721	358.556	396.487	1011.11	321.715	885.089	379.951	1388.87	1128.93	1146.59	1372.15	400.822	438.42	473.898	1042.72	731.283	1276.99	9503.78	3655.14	4707.49	613.058	769.331	559.009	139.376	1084.21	845.033	704.752	631.19	222.592	397.738	308.885
1	18	1	9.2e+25	CL886	946.838	1369.7	1281.53	429.429	902.824	1045.37	595.544	1148.53	1126.56	2598.68	3416.1	3896.01	1064.41	1161.32	771.371	1489.6	1820.47	667.438	2146.78	759.233	1852.99	982.251	881.558	1333.04	2343.11	1688.87	1561.19	1980.53	2090.42	2742.26	16054.7	6941.95	11996.2	3043.52	3041.75	1960.06	4326.52	27741.9	15520.8	2076.12	1985.32	2059.46	18435.5	19896.7
1	19	1	92I24	CL1001	1189.84	1974.88	975.109	194.077	649.922	574.171	1312.73	2473.5	1424.6	1035.66	900.694	1496.09	1370.51	996.511	563.067	791.771	1419.17	458.102	1160.58	571.529	1822.78	2257.23	2563.96	2961.26	752.908	1045.45	902.099	498.137	406.704	592.363	10657.7	3942.55	7131.64	889.124	1179.57	644.979	943.699	4115.77	1999.02	599.453	534.982	501.507	1036.46	1031.88
1	20	1	92M24	CL1115	1492.06	2091.61	1197.01	294.163	323.847	280.935	632.957	1130.99	611.482	163.059	90.7817	626.888	615.553	633.077	330.255	279.556	726.603	268.379	554.919	320.492	905.763	919.861	1024.42	1018.47	176.225	200.992	232.814	145.253	109.139	107.749	2270.9	778.51	1036.04	582.437	654.75	537.361	425.443	1594.48	648.409	729.198	399.411	224.815	265.073	94.6704
1	21	1	93A12	CL1236	1449.72	2358.83	1319.22	992.29	2684.65	2081.6	1476.38	2464.61	1584.48	962.101	1016.35	1514.29	6064.24	4868.35	2329.87	3127.3	5627.51	1939.84	2868.96	1313.63	3552.82	4383.61	4444.46	5640.32	1391.68	1509.72	1621.5	580.471	609.256	860.778	6366.59	2494.02	4270.91	3445.48	3965.06	2042.4	1310.3	5680.54	3507.86	2867.53	3063.26	1486.19	684.923	489.808
1	22	1	93000000000000	CL1348	1187.37	1758.21	947.184	2392.75	6456.23	4224.47	13416.7	18006.1	10517.5	1666.34	1138.17	2754.93	9552.25	8067.29	3280.65	7549.62	14934.8	5109.06	8941.86	5065.62	12230.8	20152.7	18897.3	23147.9	8151.75	12815.8	17336.6	2886.61	1329.05	3465.32	39862.4	20180.8	27411.3	10039.2	12542.6	6350.66	16309.2	62628.8	25345.5	18866.4	21877.2	8261.12	25995.6	28257.8
1	23	1	93I12	CL1461	1623.78	3492.05	1646.27	603.809	1459.33	1666.65	1243.48	2457.06	1527.22	1078.84	989.615	3370.69	2902.9	2597.28	1357.26	2441.69	3713.36	1465.42	2569.89	1174.59	3616.34	4100.08	4455.31	5829.18	1615.09	1598.37	1391.03	1591.76	1174.89	2031.68	6108.33	2207.3	4367.89	1044.96	928.071	654.852	452.142	2460.1	1439.47	1125.81	1231.17	1122.64	1223.17	1039.94
1	24	1	93M12	Blank_N11	66.1563	161.446	372.579	31.2456	258.784	48.736	37.8656	887.916	140.61	165.326	127.906	5531.33	33.5311	97.7426	34.3281	164.538	88.6242	206.806	144.994	19.358	178.043	107.7	67.9207	30.0983	32.051	75.5548	118.546	250.344	122.528	251.25	19.114	132.896	47.2607	128.992	60.6251	90.5073	77.1844	29.0912	388.517	162.558	106.471	24.1718	419.388	617.129
1	25	1	93A24	CL1252	45493.5	61546.3	47416.7	59348.5	82983.6	99727.8	81871.2	96312.2	85671.2	55144	55736.1	52287.9	68156.7	61585.3	50608.6	90216	95028.5	65999.7	67061	64071.5	57245.7	66631	81200.2	91435.8	78412.7	85827.9	73431.8	79098.4	59774.1	69567.4	69033.8	48043	77016.8	100212	74503.3	67539.4	66183.7	76494.4	84506.4	57289	65484.1	63174.7	83978.1	80632
1	26	1	9.3e+25	CL1360	6141.13	11019.1	5175.98	23946.4	61290.2	65019.3	56707.8	49301.7	44936.7	8333.88	5768.7	18532.8	30906.9	38415	18455.6	35938.7	62660.1	27586.9	38539.5	21427.6	42920.7	45012.1	43434.4	47141	19272.8	26055.1	30096.3	13063.7	6426.26	14931.2	47893.5	35506.6	56569.3	57766.1	58724.5	31708.8	13611.1	50430.2	30884.9	38571.7	39293.9	15217.4	52424.1	48460.4
1	27	1	93I24	CL1475	3248.95	7824.89	3225.01	18247.7	46805.9	59510.4	13620.9	23082.8	13973.8	2132.52	1622.24	17199.5	17156.3	21233.9	8747.17	17270.7	29484	13014	24128.6	11924.4	34939.6	39706	39153.7	49138.6	14437.7	20400.3	22883.5	1059.16	663.763	1167.92	23212.7	8923.77	13935.3	6623.72	6659.88	3543.49	7727.97	49886.7	23638.5	9729.49	8575.55	8122.81	11934.6	13119.6
1	28	1	93M24	Blank_N23	104.125	184.973	61.1115	179.991	153.543	47.132	43.6899	138.634	75.6826	184.785	194.188	9190.5	76.2873	35.3032	104.91	61.0793	85.0655	30.2536	57.7675	23.239	32.9564	108.548	5.34798	36.441	85.5767	88.1498	71.909	250.678	394.576	122.886	82.9964	142.482	39.0983	69.7473	69.2097	92.1809	60.766	314.338	114.834	77.2049	27.9808	155.236	197.906	249.351
1	1	2	87I12	SMLC19B06	261.385	226.613	277.393	34.018	265.14	191.363	82.5792	242.05	96.001	489.844	454.92	139.831	141.591	162.77	80.7101	312.873	190.741	64.4305	41401.1	234.964	141.112	111.558	122.708	141.792	168.033	291.908	263.618	290.384	72.3635	147.932	446.995	281.16	140.304	306.802	228.453	188.595	155.618	213.298	318.913	127.688	40.771	92.8389	92.4681	302.036
1	2	2	96M12	SPOTTINGBUFFER_M_12	125.312	34.8591	109.728	109.607	299.772	136.143	135.664	79.0402	108.19	28.6624	177.777	84.2491	44.252	24.8065	166.239	101.984	63.6229	54.9558	84.522	23.8462	28.5824	76.0011	36.5007	66.6016	78.0309	96.7074	58.4179	156.709	220.543	137.169	40.1681	89.9056	23.8346	60.0203	85.9848	105.069	91.1926	65.1687	132.18	97.5741	31.7816	58.2145	154.455	328.129
1	3	2	87M12	SMLC20G02	49.7795	33.3768	62.9983	124.931	242	126.84	96.56	114.217	82.9319	129.764	129.739	40.1458	33.1151	80.1776	125.094	68.9847	46.098	18.0059	11.8346	65.9378	28.1075	16.0976	47.0394	11.9208	75.9834	128.058	47.7316	68.9829	161.087	126.385	33.9088	83.8821	36.1499	292.401	42.2879	99.6712	96.3217	14.5891	43.7335	77.2778	19.3477	167.116	153.543	733.299
1	4	2	87A24	SMLC13D06A	111.358	78.7169	31.6626	155.88	199.314	188.359	232.471	306.177	190.926	1340.57	1338.62	1253.5	178.682	313.002	249.524	383.387	372.315	190.555	360.977	49.9092	128.756	127.671	135.723	135.58	592.597	543.209	213.547	438.609	473.576	506.077	188.947	303.403	326.613	174.505	290.547	265.123	119.207	537.031	418.952	182.417	643.478	287.613	96.5522	517.8
1	5	2	8.7e+25	SMLC16G12	752.352	1158.03	931.789	408.819	598.377	638.998	811.721	1395.13	1149.91	620.981	449.966	473.049	1028.71	735.071	562.334	1181.17	1100.12	562.776	1149.12	663.772	1063.06	508.13	792.713	718.266	1366.03	1145.57	809.737	783.597	626.237	717.008	1961.93	1616.29	1051.54	866.058	743.179	698.498	896.616	3083.1	1814.91	833.283	395.32	1462.3	597.084	481.909
1	6	2	87I24	SMLC19D03	2793.37	4822.94	2984.68	1182.75	1956.61	2776.75	3071.85	4934.5	3464.14	2457.6	2484.49	2443.32	11360.4	5727.51	2415.61	6634.94	8501.76	3605.98	8301.68	3943.78	11505.5	7075.02	9990.55	12615.4	5322.83	4926.18	4101.72	3473.95	2877.28	4082.39	15981.8	7028.81	7783.32	4353.84	8647.56	5913.2	2623.96	9745.99	6143.46	9292.46	7669.95	4602.03	2976.53	3212.57
1	7	2	87M24	SMLC21B05	1459.46	1630.09	1660	460.813	721.673	763.193	633.818	1228.3	970.276	503.064	362.583	329.374	1046.53	904.993	775.25	375.455	564.306	748.582	782.501	563.873	483.683	498.958	503.958	650.657	843.426	878.411	735.589	335.724	385.219	384.589	1251.19	925.975	956.463	949.911	1128.93	673.826	1006.91	2097.78	953.097	533.213	394.97	491.969	307.839	222.356
1	8	2	88A12	SMLC22G03A	329.5	263.577	405.488	173.975	327.533	294.866	457.511	689.14	481.117	482.745	379.879	430.417	313.413	442.846	295.505	522.387	815.952	256.488	703.283	337.119	641.474	476.197	425.654	552.263	745.258	674.213	627.015	582.639	669.757	768.837	706.754	488.196	784.957	706.138	351.778	463.359	372.244	1172.87	837.453	614.612	637.884	747.031	386.186	376.972
1	9	2	88000000000000	SMLC24H07A	101.484	123.586	295.847	254.757	129.209	72.9668	106.759	219.921	59.7835	322.388	549.932	463.806	148.572	154.474	168.502	176.592	128.302	59.6503	133.418	163.188	211.569	90.8232	109.58	95.8073	221.415	57.0647	75.1571	329.335	253.223	310.37	87.8842	81.7665	107.663	156.815	119.145	247.255	74.0773	363.611	36.0085	167.94	60.6117	29.7001	193.72	182.864
1	10	2	88I12	SMLC27B11A	3662.35	4431.09	4450.71	1729.42	2863.58	4127.56	2698.73	4061.23	2446.95	7651.27	12851.4	9447.79	8922.18	8176.4	3858.53	6481.84	8206.74	4300.81	6032.57	4023.61	8733.77	14512.8	12656.9	18734.2	17087.2	16253.3	18371.9	5752.48	7172.31	6719.78	10029.7	5569.3	21374.6	10184.5	15107.2	7648.48	11175.2	27798.8	13578.7	14232.2	13897	9002.03	8453.51	9311.43
1	11	2	88M12	SMLC29G08	603.736	410.932	632.213	322.124	583.406	548.742	819.975	1129.48	691.979	1413.09	1125.1	1183.87	1143.24	986.719	411.16	648.305	1349.32	492.934	1028.05	281.535	1756.27	757.73	1113.65	1077.14	1006.73	998.556	543.604	714.534	876.607	866.038	1381.1	668.093	1398.96	550.081	531.304	381.319	133.035	1552.2	1205.71	1329.92	673.614	809.555	637.392	976.418
1	12	2	88A24	SMLC22H06	1228.8	1860.36	1324.61	524.604	1077.87	1120.92	1358.09	2222.87	1537.96	917.433	773.175	789.975	1425.56	1299.24	897.655	1550.7	1703.4	909.573	1992.62	616.384	1606.36	1123.46	1372.23	1869.5	2287.18	1868.7	1393.24	1230.16	970.345	1269.57	3531.52	2124.78	2349.96	953.751	701.63	588.781	1062.37	5666.31	2387.9	994.945	695.784	2102.25	1133.33	677.908
1	13	2	8.8e+25	SMLC25B03A	1382.65	1900.99	1078.47	1378.63	3416.53	2730.1	7605.71	10367.4	7001.39	731.869	719.608	1068.6	23614	13092.3	6287.62	11469.3	23228.8	6829.04	7399.37	3927.42	11325.4	13751.5	16691.5	19917.1	5185.47	6872.61	7582.29	1459.22	1299.11	1865.34	20756.8	7660.49	12506.6	2145.94	2460.17	1355.01	4054.75	15314.6	6977.06	2451.59	2403.46	1447.51	2765.47	3320.09
1	14	2	88I24	SMLC27E06	66.7834	105.395	101.845	105.146	214.633	156.935	74.5321	109.159	157.676	360.587	376.075	212.787	181.91	175.403	108.213	90.289	185.881	38.9297	430.672	58.7763	200.178	28.532	95.9477	90.3246	228.778	312.359	196.946	380.981	141.097	322.142	70.3813	107.019	74.3308	410.869	26.2344	259.94	64.0084	213.864	345.165	256.072	130.389	209.13	94.5675	275.908
1	15	2	94M12	mCD037164	325.358	353.716	446.369	68.9378	405.287	384.331	453.399	541.02	416.437	468.469	571.619	532.103	569.331	563.944	346.348	437.602	950.169	179.176	987.28	315.202	1430.05	503.918	746.889	919.228	771.707	944.592	844.426	816.867	871.098	849.083	927.517	524.268	1001.63	558.47	280.617	281.501	145.47	1292.06	888.275	997.77	206.775	478.979	421.805	522.981
1	16	2	88M24	SMLC30A02	371.338	285.711	293.678	233.725	358.405	187.419	52.5053	142.669	133.457	466.204	490.678	420.949	508.319	264.694	227.753	479.491	415.377	149.017	374.621	100.682	152.25	190.202	110.488	126.89	328.176	217.035	258.231	209.632	138.751	221.481	458.027	245.024	125.41	74.271	77.966	146.463	234.659	339.533	284.986	168.013	137.229	252.252	192.051	639.358
1	17	2	89A12	SMLC32B04	266.844	159.666	221.275	117.502	138.889	154.873	65.5843	60.5093	160.608	609.482	586.469	551.484	157.9	75.7883	163.251	101.135	65.1485	117.049	129.173	67.3344	145.883	76.4107	80.5651	159.845	129.147	101.315	183.39	82.8513	152.932	138.162	172.842	168.768	34.198	45.0956	250.075	71.4505	165.964	108.014	207.18	124.335	62.675	72.0216	77.3919	515.995
1	18	2	89000000000000	SMLC35G12	2652.05	3096.97	1891.88	5574.12	14977.4	11348.3	14464.3	23604.3	14035.3	2407.02	1682.92	2990.07	16365.9	13512.4	4746.76	10993.3	23114.9	7169.87	22278.2	12736.6	29732.2	25872.7	25444.7	30676	10200	14919.4	16842.3	9729.94	7381.52	11158	39358.8	16244	25287.4	11312.9	14744.7	8262.09	3978.11	15417.9	6618	19783.5	16179.4	5600.72	7205.33	7718.93
1	19	2	89I12	SMLC3H10	212.994	128.677	122.159	70.3323	241.174	44.7495	81.5529	50.95	50.0878	43.4582	308.862	254.308	146.577	126.741	188.019	185.989	120.004	96.8384	22.5427	79.7033	107.309	40.8641	80.073	37.8213	56.6999	56.0565	31.1789	74.885	228.132	104.317	92.6688	99.6876	32.9743	91.0393	26.4381	141.447	318.436	284.445	31.5025	46.4327	295.925	72.1407	203.726	332.543
1	20	2	89M12	SMLC48A01	242.463	393.16	220.394	184.492	264.693	70.6598	108.537	146.038	91.6011	241.439	370.637	370.458	119.904	112.897	122.045	252.229	192.274	141.34	377.946	253.686	292.482	478.756	518.501	565.671	265.377	288.993	216.565	325.665	309.639	376.502	1886.19	641.322	1339.32	223.251	190.105	285.543	282.601	637.003	350.665	254.467	262.404	305.922	191.418	347.141
1	21	2	89A24	SMLC32D07	112.195	80.4244	100.789	73.7748	267.63	46.9513	10.7199	146.656	80.3032	259.111	452.47	826.1	155.014	113.783	155.025	149.998	32.7797	26.5582	82.0326	59.0863	37.78	68.7455	89.6204	91.1413	80.9149	66.7508	12.9923	184.534	62.4553	169.5	192.537	120.959	154.109	79.1424	29.3871	120.904	56.8788	227.442	81.216	187.899	305.711	248.647	69.0488	348.521
1	22	2	8.9e+25	SMLC36H07	1208.43	2120.21	1279.2	531.732	793.68	936.003	808.517	1467.2	966.317	1025.57	1189.41	1630.41	992.672	1126.58	725.505	1154.97	1222.54	754.507	1050.73	631.829	1127.71	730.484	1116.21	1038.5	1296.46	1329.11	1132.37	858.314	885.352	1018.15	1860.45	1458.84	1552.58	1310.12	1063.16	790.133	770.603	2917.44	1671.55	878.553	741.738	1797.43	574.863	603.767
1	23	2	89I24	SMLC41A08	587.527	807.744	884.532	182.867	425.498	780.599	380.437	435.631	358.801	1934.2	2170.77	4252.6	413.413	554.119	355.29	850.075	1074.1	452.262	1461.6	428.587	962.098	654.566	513.813	621.046	918.84	867.944	787.212	746.768	867.714	995.747	629.725	412.612	674.276	626.032	371.978	338.159	275.435	965.307	1006.2	1202.35	940.465	580.444	604.819	233.539
1	24	2	89M24	SMLC49E05	287.299	461.597	340.617	74.6571	178.226	135.946	99.5788	170.909	137.283	88.4198	114.837	4311.96	178.498	273.433	98.6573	211.422	692.723	114.219	276.936	275.958	375.589	310.588	233.46	269.661	65.4322	180.464	156.25	91.5153	84.9595	95.8649	339.544	139.213	249.856	187.957	98.5242	172.093	76.8048	177.86	97.0769	134.321	105.35	88.0393	172.683	193.184
1	25	2	90A12	SMLC55H08	1345.51	1837.2	1330.98	108.751	366.441	255.912	197.221	477.118	285.793	275.662	250.676	6458.9	1204.96	897.028	558.896	383.927	608.608	325.373	562.752	231.715	657.234	604.878	609.543	826.751	232.144	268.593	264.917	218.218	205.296	251.247	2797.34	949.898	1280.05	455.51	580.109	227.203	151.928	1090.53	378.837	446.911	601.022	325.495	750.954	627.046
1	26	2	90000000000000	CL59	1624.41	3078.62	1414.16	779.055	2104.02	1933.39	5466.83	8665.75	4906.08	2759.5	1905.84	12541.4	8737.12	8354.49	4716.96	4117.66	8169.62	3249.13	13908.1	7860.79	21121	15130.8	12887.5	17345.6	6383.37	10113.1	11692.2	10451.2	5383.05	11835.1	31876.6	12219.1	19128.2	17701	21872.3	10211.7	9690.52	40780.9	18071.7	29484.9	33055.7	14896.9	5777.3	6818.94
1	27	2	90I12	CL181	388.767	1271.44	528.118	350.628	794.342	606.39	641.711	1395.98	800.816	1268.73	1297.55	13521.3	526.375	820.656	446.468	1060.92	1222.7	481.389	1315.2	570.994	1322.6	1230.41	1448.13	1859.31	449.215	423.537	592.961	198.203	288.192	189.304	2304.92	881.581	1168.05	778.042	836.53	476.262	171.437	922.267	864.941	254.869	260.043	386.597	388.562	203.371
1	28	2	90M12	CL291	2162.4	4265.77	1863.76	9712.01	26490.5	27245.9	14336.6	21541.3	12986	3598.62	2679.64	10295.7	22345.1	26763	13877.2	12110.5	23572	9457.16	12154.6	6719.49	19092.1	21133.8	18925.7	24894.4	8008.77	13062.4	17418.9	1490.71	799.515	1753.69	25928.1	10376.5	15139.9	3103.92	3680.57	1907.33	6142.06	30628.1	13608.8	9012.66	8502.57	3152.87	8748	9524.56
1	1	3	84A12	SMLA33B12	297.136	252.837	280.831	198.588	229.203	167.469	154.529	548.964	434.571	272.395	231.992	170.069	226.461	365.097	224.655	433.391	338.974	112.035	24733.1	165.86	138.693	288.27	189.28	174.938	405.32	295.164	183.054	123.433	269.676	119.323	223.834	430.843	398.583	313.589	155.922	309.168	119.685	403.415	328.828	117.907	114.199	380.048	229.698	172.43
1	2	3	84000000000000	SMLA37B01	539.994	825.185	515.991	241.489	456.715	312.823	351.162	723.459	578.994	689.189	539.979	650.192	611.662	550.8	314.671	1114.09	759.699	313.87	629.1	425.153	659.629	549.414	734.925	752.369	1142.57	762.903	532.167	598.812	416.618	588.47	686.644	688.895	856.096	468.818	520.648	2025.88	271.205	883.496	502.002	277.698	281.592	620.707	350.605	70.4124
1	3	3	84I12	SMLA3H02	41280.7	50187.7	45983.2	69622.3	89189.9	77833.7	67027.9	69523.6	52718.3	57249.7	59193.7	59016.2	61716.3	46988.1	62668.3	83039.4	73536.9	59307.4	59427.6	68607.7	54303.3	54769.8	62832.2	64264.9	60325.8	61460.4	74026.6	56584.1	65525.6	54020.5	63254.3	41783.2	64172.7	95601.2	76064.8	69568.1	65435.6	68260.4	76226.1	56166.8	57239.7	57039.2	71336.1	53373.9
1	4	3	84M12	SMLA43F02	2631.2	4318.03	2931.92	109.806	155.612	158.677	332.338	366.01	457.777	697.585	599.53	551.699	771.469	367.039	167.65	310.659	355.835	147.693	252.07	100.053	359.088	166.678	357.116	416.524	419.42	256.958	146.204	162.583	154.616	213.594	325.847	203.675	197.4	202.785	181.418	104.663	153.562	259.33	304.152	181.184	154.096	176.344	153.245	205.312
1	5	3	84A24	SMLA33F05	197.928	383.433	135.954	254.366	416.488	286.253	36.1078	436.544	293.675	922.466	860.023	317.616	220.687	447.184	511.713	738.924	753.759	247.932	706.085	239.984	234.815	206.142	414.234	211.85	765.011	653.955	574.863	279.086	385.812	289.916	203.607	388.419	457.089	139.472	107.386	151.362	255.259	604.502	365.19	277.208	95.2733	154.684	291.689	694.83
1	6	3	8.4e+25	SMLA37D12	552.872	295.745	568.869	356.92	484.414	500.9	792.58	1178.93	819.927	1196.42	982.753	778.137	748.563	449.378	431.092	524.711	646.472	259.229	460.021	183.474	665.006	374.652	732.271	710.048	1126.05	815.869	633.238	383.961	496.064	441.246	928.998	538.28	883.991	324.867	202.724	286.17	607.096	1155.93	919.309	331.269	334.476	481.114	336.913	672.286
1	7	3	84I24	SMLA40D11	396.066	584.424	503.346	114.082	462.558	797.474	396.207	535.909	394.885	451.861	440.236	341.98	742.981	394.351	305.406	735.533	1263.21	439.685	632.365	221.058	1068.5	619.062	797.129	1028.3	613.666	468.086	536.368	176.674	156.198	220.384	753.319	372.306	589.945	306.188	330.599	188.344	232.206	821.695	511.608	255.417	199.674	109.726	207.974	368.173
1	8	3	84M24	SMLA43H02	823.513	1001.74	590.471	144.937	101.271	151.007	334.167	537.621	317.789	195.696	111.13	217.669	477.739	404.053	175.346	329.848	300.127	157.734	251.338	218.584	434.23	391.693	515.881	633.176	384.22	248.835	247.535	111.914	162.206	164.875	433.418	124.987	224.106	370.542	168.416	154.113	124.983	262.109	217.209	204.018	187.316	82.1751	157.006	107.244
1	9	3	85A12	SMLA45H05	378.727	425.221	338.3	109.371	144.29	70.0564	96.8467	277.269	198.106	1306.79	1508.81	1983.6	176.238	259.317	167.45	370.907	166.436	99.7799	149.022	687.389	156.39	192.706	188.619	178.89	302.413	215.048	209.276	171.203	177.385	239.953	724.437	280.636	524.251	140.502	150.44	146.309	147.89	559.816	337.712	163.985	163.487	184.764	172.696	140.694
1	10	3	85000000000000	SMLA4A02	349.787	495.683	311.504	98.9941	288.791	74.0604	367.239	562.533	423.318	623.596	566.084	914.195	557.806	301.774	290.286	1631.66	3234.69	1020.29	3380.54	2139.01	5661.49	2378.92	2582.03	3576.91	1464.24	2110.11	1891.41	2569.19	1936.8	2936.82	5442.33	2476.86	3585.65	336.227	531.038	364.921	895.788	1853.92	926.102	547.145	569.153	630.719	256.27	280.199
1	11	3	85I12	SMLA52D07	2848.66	4905.01	4190.65	1067.98	1830.16	2813.99	2135.75	2880.52	3082.91	25025.2	27121.6	25231.2	2841.4	2508.08	1232.15	2005.86	2485.25	1227.4	2673.9	813.546	2611.4	1818.61	2220.17	2662.54	2196.24	1736.29	1614.75	1168.62	1634.16	1463.34	2800.14	1945.2	3099.4	1449.09	1362.1	830.861	1448.31	5303.85	3542.45	1279.39	908.115	2454.15	1915.43	2321.27
1	12	3	85M12	SMLA55D10	8249.92	11049.3	9562.02	10395.2	20739.4	23379.1	26755.7	30201.1	23405.8	14924.8	15378.9	19811.8	29015.4	18167.4	6935.64	29060	46373.8	22838.6	29958.3	21071.2	36159.2	31697.9	33988.3	45915.4	39062.1	40772.5	41042.5	18987.6	14510.7	23466.7	46047	27479.4	34685.1	47747.8	61820.7	43562.1	19731.3	49110	26154.4	39310.2	41825.6	14339.3	6083.57	6615.04
1	13	3	85A24	SMLA46C12	2304.73	2492.5	2815.9	1166.88	2522.3	3092.38	983.331	2579.63	1393.71	18692.4	22765	24980.2	2571.6	3121.29	1303.7	3440.96	2796.61	1455.11	3245.78	1378.61	2918.47	1122.91	1282.97	1389.05	4740.5	2984.73	1742.24	1544.25	3345.3	2653.04	1414.61	1311.17	3027.23	1788.63	2066.76	1451.16	797.229	2707.68	2817.42	2096.41	1751.91	2246.29	1186.74	522.908
1	14	3	8.5e+25	SMLA4E05	3821.25	5418.33	3418.21	7170.76	14256.5	15641.4	7845.79	10529.8	7314.83	1758.81	1987.11	2644.63	41223.4	39855.5	25803.2	28766.2	48385.5	21719.6	31983.3	23246.5	42519.5	12564.8	13912.3	18738.3	14648.6	15752.5	18903.3	1319.67	940.587	1669.93	7881.51	2886.24	4609.8	10395	13239.4	6823.15	5078.02	15877.4	8770.68	7852.85	7634.84	1884.65	6173.31	6280.16
1	15	3	85I24	SMLA52G01	964.627	1155.99	843.948	67.0654	243.413	134.341	244.031	265.881	198.726	5204.7	10408.6	7744.44	380.737	278.762	118.614	390.232	239.38	134.867	288.642	403.656	279.6	261.908	394.181	443.194	267.358	96.9503	140.164	159.063	150.995	161.442	461.348	211.768	275.299	150.909	182.534	154.205	124.975	185.195	123.325	115.05	117.645	134.667	143.452	125.906
1	16	3	85M24	SMLA55G12	1030.26	1660.17	1638.74	806.55	1395.63	1954.76	1065.83	2516.6	2042.76	1908.42	3173.79	2852.88	1443.54	2212.48	1234.71	2287.65	1992.83	989.397	2017.24	939.054	1833.7	1337.63	1391.45	1983.73	3386.86	2052.13	1657.38	1141.61	1682.1	1962.73	1822.42	1690.99	2929.86	1553.07	1281.86	1273.93	876.922	4168.57	2549.61	1489.4	1389.55	3397.14	1697.26	1049.91
1	17	3	86A12	SMLA58C11	260.646	41.5186	134.986	122.821	167.107	50.9567	53.5251	45.3298	22.5626	58.7052	265.358	84.8263	174.756	60.1427	187.678	81.9072	116.571	22.1166	22.8651	58.7652	110.506	140.011	81.647	25.3363	109.164	108.724	69.0199	172.213	254.9	96.2732	35.6648	146.178	56.2705	277.575	41.4987	124.881	27.6154	183.014	79.7744	94.6528	36.9561	186.778	78.143	707.345
1	18	3	emp	emp	117.225	40.2065	24.1705	195.773	185.004	195.009	99.1496	88.7531	211.546	116.713	158.43	100.996	121.778	55.5279	169.621	155.343	111.936	48.0944	102.156	58.0486	58.4495	112.968	65.8171	25.199	112.253	99.2948	74.4534	263.36	190.589	19.9603	26.1736	88.9704	29.021	251.698	57.6366	145.042	61.7955	40.4655	202.23	98.1867	148.175	24.8012	211.947	724.95
1	19	3	86000000000000	SMLA60F06	80.4758	145.716	171.592	77.4739	299.875	154.124	64.1743	79.3575	195.515	312.902	312.447	290.821	84.9609	133.141	139.683	70.6186	168.996	71.4507	183.295	65.2967	209.637	73.7074	33.4307	89.0551	104.716	56.5089	93.2356	152.919	263.874	309.905	98.4561	218.636	156.394	155.767	37.1532	55.729	244.013	293.973	253.278	287.735	291.841	171.918	205.631	650.269
1	20	3	86I12	SMLA6E10	31806.1	43028.6	28271.6	694.07	1872.41	2116.39	1916.4	3908.34	2563.97	1536.31	1758.01	2004.36	3972.32	4185.83	1519.49	3616.66	6688.08	3376.38	6239.5	4041.77	9660.89	19574.1	18683.8	21377.3	6839.23	7549.93	6442.87	1317.15	992.897	1577.83	4059.11	2071.61	2519.03	1767.37	2568	1428.91	308.85	1140.97	798.627	1679.49	1503.04	1268.47	1701.52	1835.73
1	21	3	86M12	SMLC10D11	15073.1	24422.5	13695.5	34652.6	62590	77830.6	47852.4	50450.3	46684.3	20107.3	15475.2	23451.5	41754.8	46890	33781.6	46537.3	64339.2	42625.7	59532.4	47992	50719.5	46715.4	47600.4	55867.9	55051.5	56377	58907.9	41117.5	27469.8	40352.5	53719.2	36534.8	57758.2	46261.4	61169.7	34229.8	50079.5	75998.4	68969.6	61842.4	56522.4	47821.1	55827.2	46148.1
1	22	3	86A24	SMLA58F06	90.2405	180.672	161.145	136.208	178.669	88.3314	105.61	111.712	72.0895	786.823	549.052	1210.78	16.8504	70.3817	169.702	124.306	74.8811	39.4448	263.814	103.569	39.0514	41.0436	47.4155	22.5192	188.583	131.978	66.7538	129.494	216.256	67.4476	108.816	251.964	170.708	51.3911	16.5266	67.2164	174.465	35.5196	465.086	229.751	130.548	134.203	124.213	206.729
1	23	3	8.6e+25	SMLA60G12	336.646	428.258	462.815	137.417	353.459	307.938	229.259	493.819	304.133	1206.21	902.592	2194.63	461.158	350.344	414.08	537.513	580.78	344.38	753.575	330.425	726.033	274.348	425.259	333.645	804.317	797.882	653.341	686.642	893.827	817.978	588.567	446.424	538.627	575.748	520.696	644.829	410.401	1024.84	926.156	610.012	533.927	713.748	403.23	254.284
1	24	3	94A24	mCD036888	892.656	1375.77	1474	367.402	892.468	1359.63	573.935	1255.36	1069.22	1912.19	2267.37	3492.65	927.828	1457.18	930.772	1756.27	1660.6	680.988	2037.7	915.124	1866.41	934.115	1063.44	1053.01	2488.5	1664.22	1405.2	1173.06	1718.89	1781.29	1535.76	1087.11	2006.71	1017.75	621.414	595.469	534.407	2473.06	1619.46	1228.96	1044.84	1581.1	1024.5	766.096
1	25	3	86I24	SMLA7E12	682.109	1166.07	651.017	264.029	528.095	410.549	178.275	737.01	386.779	2833.28	3412.35	6500.35	350.237	618.671	397.66	1496.02	1524.06	790.912	1039.94	556.327	875.905	848.049	973.157	1065.48	1441.95	810.751	874.309	379.36	992.684	641.2	733.349	322.537	737.925	649.556	249.543	392.355	155.871	643.665	527.447	347.285	468.633	659.318	301.612	144.083
1	26	3	86M24	SMLC10H06A	459.72	829.435	495.164	312.702	350.042	460.903	449.56	1178.32	432.711	552.243	992.395	5364.19	408.484	496.794	442.535	907.198	629.915	335.301	555.835	333.968	529.092	470.172	412.22	457.785	558.464	557.707	281.032	215.318	448.236	312.181	637.008	420.006	614.443	326.231	226.087	242.233	247.316	707.821	848.445	299.762	298.014	421.42	437.656	189.667
1	27	3	87A12	SMLC13B11A	76.9716	193.21	432.284	91.6816	136.225	104.054	80.2827	69.8714	46.9817	601.933	424.738	6474.53	72.1959	100.674	160.559	99.5072	225.022	90.6884	114.822	28.7232	387.926	44.4314	63.4203	59.9797	155.068	103.618	184.624	155.966	222.536	247.697	127.07	127.884	111.791	144.548	60.3675	164.194	11.8083	130.599	322.946	242.595	126.803	107.704	80.1288	174.795
1	28	3	87000000000000	SMLC16D01	9212.2	19274	7871.55	15317.2	39424.6	44125.1	40624.1	50174.4	38655	15162.4	16372.6	26788.4	29590.6	34771.4	22928.9	19262.6	34366.5	18981.8	39179.6	20606.7	40795.1	39138.1	37380.9	45555.7	30405.6	51484.1	56394	35538	24366.7	36424	40516.3	26112.3	55359.9	14875.5	13635	8563.48	17380.4	49472	32798.1	26278.9	30578.6	18203.1	30251.8	51502.2
1	1	4	8e+25	CONTIG9006	1933.08	1825.45	1646.57	868.989	1078.6	1087.68	2617.92	3182.36	2009.73	1590.93	1129.14	1351.69	5392.83	1541.45	863.071	2277.68	2937.76	1271.01	3240.57	1514.08	4527.57	4844.87	6753.67	8971.63	10433.3	9511.74	8345.35	1735.04	1246.36	1997.23	10451.3	4924.66	3774.34	11517.4	16411.3	9826.96	5031.68	9531.5	5758.63	5825.02	4324.09	1641.18	338.317	400.584
1	2	4	80I24	CONTIG9127	2761.9	4427.66	3527.97	5884.75	7618.39	11244.6	29669.8	27040.8	21794.5	3084.17	2981.11	3174.03	19122.9	6732.11	3676.98	11424.8	12862.7	6702.09	15499.4	11487.5	21426.9	19459	20846.2	27901.1	17606.1	14652.4	12917.6	9821	8972.35	12289	41629.3	27704.7	27382.7	24864.3	33697.9	17747.7	8191.19	17796.6	11203.6	7177.6	6219.74	5259.98	10734.8	11410.2
1	3	4	80M24	CONTIG9258	86102	89078.6	83963	4648.94	3956.9	9914.94	15215.9	18871.6	12619.4	5807.96	9670.33	10055.6	52917.3	24318.5	12873.9	39736.9	54334.4	46778.3	39218.8	27854.3	43303.6	33022.2	34043.4	49998.2	29544.6	31669.4	24376.2	11772.1	8457.24	14816.1	24908.7	14220.6	17923	14361.8	27967.3	14814.9	9416.89	16234.5	6254.55	13674.3	11093.6	2705.78	4621.12	6021.45
1	4	4	81A12	CONTIG9372	1840.45	2488.38	1796.51	3060.2	3983.08	4454.29	9795.64	10234.5	8384.12	718.343	539.308	666.614	32320.7	13696.3	4991.41	12341.6	16824.6	5989.76	9521.45	5771.39	14572.7	10071.2	11643.5	15496.8	7939.02	8566.2	9706.77	6798.32	5223.73	8366.62	24993.8	12351.8	9939.22	8279.04	12888.7	7865.61	7660.59	21022.7	12755	17467.3	12177.6	3487.43	5597.2	5088.03
1	5	4	81000000000000	CONTIG9505	3060.49	3875.07	2662.25	2897.74	3849.27	4636.54	18509.9	24434.2	16355	4159.81	3430.96	4871.97	34765.6	14195.4	6378.97	10000.1	14530.5	5766.11	25008.8	12941	38194	16871.3	23588.3	27414.3	21967.1	22824.7	21694.5	5554.83	3940.04	6804.36	36960.4	14133.5	17938.9	2451.67	3293.39	1808.61	14598.9	34747.7	15148.2	7954.52	7349.17	3604.89	6937.4	8007.27
1	6	4	81I12	CONTIG9633	3968.58	6206.6	4482.94	1002	1616.18	2332.18	4284.8	5513.04	4014.81	1473.53	1578.24	1679.71	16895.1	7963.5	3169.51	12675.4	17387.7	8194.54	13413.5	6763.61	17267.1	5665.15	7963.41	9930.29	3728.63	3282.45	3173.92	1206.98	1261.55	1533.45	21117.1	8623.87	11441.3	5716.76	7855.71	4759.99	4132.64	12464.3	7404.35	3789.92	3384.5	2397.68	2652.67	3066.89
1	7	4	81M12	CONTIG9759	814.577	1160.88	686.633	460.066	640.385	634.606	1570.21	1882.04	1434.54	566.477	652.764	846.399	3248.71	1476.86	673.746	1633.33	2510.91	891.007	1678.03	981.916	2660.89	2860.91	3428.98	4208.98	680.904	760.457	657.06	266.164	198.398	268.156	5562.44	2325.2	2618.11	1248.63	1764.57	987.05	779.936	2222.6	1467.54	832.914	813.589	648.836	777.743	510.763
1	8	4	81A24	CONTIG9387	943.917	1332.93	838.587	156.078	192.096	187.489	269.577	429.926	377.142	240.694	191.885	187.804	969.648	523.983	193.507	307.803	390.069	181.427	436.294	342.541	662.257	393.084	499.754	527.205	330.543	228.362	169.532	130.277	161.981	184.599	452.549	281.604	295.083	309.748	266.89	206.122	79.418	182.773	266.148	147.602	132.875	127.753	141.425	119.152
1	9	4	8.1e+25	CONTIG9520	1332.3	2255.03	1592.12	1485.44	2367.73	3559.86	6338.47	7414.28	5296.72	2023.71	2357.96	1463.07	6488.59	3369.48	1231.23	4809.38	7987.37	3055.92	8569.66	5142.38	11643.5	8674.92	9748.14	13310.5	4388.25	4736.69	5376.51	1324.82	1004.6	1699.25	13457.7	5521.92	8041.16	3943.25	5066.89	3219.53	2447.99	6781.93	5047.71	3387.82	2902.36	1288.78	3187.72	3412.11
1	10	4	9.6e+25	SPOTTINGBUFFER_E_24	20.0623	65.7341	204.21	15.6597	229.426	110.204	27.6863	94.6668	64.9861	69.4977	99.1283	24.1741	122.404	70.0031	188.873	12.945	119.629	35.4849	30.9284	60.5826	8.52341	20.6664	17.6132	39.5632	25.1689	53.0653	33.4255	58.6443	345.01	244.268	18.0872	57.2533	41.1731	77.5415	254.434	128.788	122.177	1805.57	286.61	78.5367	71.923	131.814	359.657	598.577
1	11	4	81I24	CONTIG9648	18391.3	27701.4	17530.5	37580.6	56859.8	68976	55346.9	56791.4	52397.9	24271.8	21364.3	31694.8	49605.6	49910.5	42912.6	65738.5	77793.5	48990.3	66678.3	51335.3	59521.7	55938.2	53879.3	59130	63957.4	66839.9	72138.4	43700.8	44513.8	46802.7	63636.7	38551.4	62253.2	65667.6	64310.3	45268	62962.4	67233.4	79239.3	63974.2	62852	66597.5	63469.4	58990.1
1	12	4	81M24	CONTIG9772	391.477	545.216	427.123	240.108	627.642	549.261	1088.56	1322.58	1163.1	655.191	602.999	764.581	2172.1	1688.26	646.002	1326.31	2310.45	711.99	2516.93	1326.33	3485.22	2600.1	3437.27	4234.74	875.441	976.907	924.524	218.364	226.405	295.325	4264.56	1665.78	2068.63	989.41	1091.83	860.219	345.105	1546.61	1141.58	547.108	515.2	330.72	512.52	321.968
1	13	4	82A12	CONTIG9879	784.005	961.204	661.364	110.563	197.972	135.325	317.937	368.331	179.986	301.076	158.692	185.353	793.803	493.393	265.023	396.607	1196.43	224.79	524.613	254.415	850.385	658.356	1089.86	1294.37	143.071	164.131	137.312	771.634	499.637	735.378	2249.33	909.088	1108.28	184.016	106.429	185.167	118.749	593.158	409.642	279.349	250.907	234.894	201.323	619.522
1	14	4	82000000000000	CONTIG9990	195.639	167.933	216.077	169.322	309.237	131.374	258.118	226.232	229.293	91.2776	101.108	177.305	317.893	284.823	178.236	291.906	645.815	254.42	705.054	299.517	1076.24	357.79	559.442	535.618	182.769	286.094	358.709	272.129	121.987	275.089	2097.64	865.667	962.755	240.053	415.196	336.805	560.352	719.497	295.451	359.894	162.029	297.689	175.79	880.395
1	15	4	82I12	SMLA13B03	805.673	1149.36	667.103	148.753	256.625	281.826	234.736	379.595	302.079	1272.65	1291.13	1768.34	415.032	448.756	270.201	473.834	840.984	287.027	660.154	321.417	791.583	500.337	546.121	667.223	821.57	538.166	504.216	426.842	544.929	604.045	720.889	403.878	845.837	280.227	148.966	313.135	165.579	1151.69	540.908	540.647	394.297	477.544	357.939	266.704
1	16	4	82M12	SMLA16B11	649.366	1368.61	646.046	574.034	1339.34	1587.55	1161.2	2022.28	1462.73	354.089	364.209	511.33	3023.92	2170.7	838.663	2805.75	5448.19	2060.33	3560.7	1550.75	5081.34	5413.64	6779.35	8569.51	2158.57	2392.98	2506.36	307.13	265.001	460.373	5309.45	2023.92	3043.89	394.395	424.665	321.761	458.072	2294.29	1128.43	803.776	802.712	583.389	770.913	530.287
1	17	4	82A24	CONTIG9894	6395.57	10803.5	5474.48	7118.39	15489	20170.3	25964.4	41608.6	29589.2	11239.4	8060.69	14287.2	17760.7	14197.7	5787.86	9395.69	16082.3	6901.82	37058	19612.9	49920.5	37799.9	40208.7	49393.3	18870	22090	25001.9	29826	22749.8	36061.5	51287.3	38697.9	55243.5	18383.7	25023.8	13183.1	6826.91	29814.4	15529.9	20795	18857.5	9953.85	47124.9	50959.4
1	18	4	8.2e+25	SMAA25671	549.162	859.646	591.15	360.308	759.85	764.209	1613.47	3089.13	1689.4	1331.34	1065.42	1729.52	8298.72	6995.41	3365.65	1809.81	5295.05	1887.1	7260.03	2980.68	8565.87	7456.66	6622.94	8543.34	3936.18	2236.49	4162.88	2643.31	2032.28	2565.03	10213.6	4126.12	7227.55	2970.83	3117.85	2198.54	5172.61	23153.6	10873.3	6558.57	5915.14	5461.37	2644.52	3564.15
1	19	4	82I24	SMLA13D10	133.154	13250.3	18.3965	60.9993	317.285	132.637	219.201	100.453	49.7299	241.215	330.002	563.537	52.8852	127.79	164.746	65.34	125.918	20.9951	85.564	140.963	176.48	99.6894	58.6848	72.0478	79.5047	58.5256	69.8098	74.7951	261.068	84.817	88.1345	144.987	165.51	91.4659	35.8509	170.49	174.263	41.006	170.448	48.6779	305.075	171.961	59.9104	268.646
1	20	4	82M24	SMLA16E08	4221.52	7866.48	4173.73	8844.96	17849.2	23993.2	31672.1	43337.7	34377.4	3176.26	2543.82	4280.72	35381.4	33938.7	15924.4	20415.6	33844	18078.1	24193.1	13378.9	30613.6	24706.5	25191.3	35144.3	21655.9	23365.9	27700.7	4844.87	2875.08	5425.9	41758	18129.6	29232.5	11737.2	15279.8	8141.56	9880.77	36708.5	21163.6	10104.2	11108.5	6707.32	11966.2	13748.6
1	21	4	83A12	SMLA20B04	6000.56	9661.83	4941.8	3063.33	8243.11	8978.9	6505.88	10773.4	6226.12	1620.97	1268.96	2198.36	16060.1	13923	7459.6	7358.99	16343.6	6719.4	12541.8	6625.42	16587.9	15989.1	15289.9	19160.4	18099.8	24404	23637.8	4567.4	3014.51	4556.24	25630.8	9989.19	18312.8	3837.37	4489.86	2444.22	7340.6	27722.1	14068.9	6822.22	6240.08	4771.28	7092.59	8013.69
1	22	4	83000000000000	SMLA23G02	117.508	272.807	50.5819	175.828	315.137	97.7413	110.513	267.596	171.277	448.271	407.142	521.174	208.663	263.916	219.99	85.0345	156.545	28.7967	211.085	80.2496	110.251	34.6438	148.586	70.1833	64.1195	84.1836	32.7006	42.1802	128.311	95.4644	141.395	42.7045	208.668	40.7732	72.3511	110.761	66.0892	280.57	185.11	104.506	80.9011	94.9092	383.327	571.524
1	23	4	83I12	SMLA27D04	352.251	417.922	415.284	197.267	501.556	339.378	158.519	280.841	194.567	250.165	265.09	1093.6	217.621	246.632	275.504	357.011	358.543	156.81	315.048	250.504	392.366	326.38	330.731	285.164	266.356	365.46	124.704	161.357	203.897	337.556	558.651	439.597	567.918	389.514	322.638	174.844	188.739	669.818	431.393	411.82	428.327	284.263	187.053	355.229
1	24	4	83M12	SMLA30C02	115.801	25.0728	85.9141	163.136	194.594	40.6391	28.0594	46.69	214.027	496.823	410.843	1639.36	40.4253	71.2619	165.064	136.392	120.794	100.046	34.8219	102.914	50.9671	60.405	44.7391	19.5549	73.3627	92.0174	12.8434	196.193	102.612	137.492	116.666	130.899	30.9672	105.872	50.0082	179.872	36.5003	33.1007	151.844	225.287	4875	279.638	131.256	147.188
1	25	4	83A24	SMLA20E08	800.374	1861.21	861.016	264.929	657.344	505.989	342.673	666.043	427.948	471.535	563.818	1753.87	709.066	733.592	382.675	1207.04	1724.03	886.877	1849.81	782.893	2618.82	2699.03	2670.56	3332.92	645.176	588.411	868.997	438.327	403.228	542.469	3036.4	1165.18	1897.45	1570.34	1604.25	947.896	334.302	1693.34	968.464	565.707	559.699	715.867	371.638	204.955
1	26	4	8.3e+25	SMLA24C01	2432.54	3155.68	2558.66	2184.11	4476.7	4234.28	4147.85	3066.71	2520.13	2746.9	2924.87	3641.71	3483.8	4837.4	2418.78	2170.87	6225.2	3108.49	4455.86	2145.57	7712.41	7023.73	4227.04	4424.91	5026.51	5743.81	4140.68	2801.95	7328.42	4053.29	1841.85	2755.08	5760.46	3356.6	2767.4	1759.16	2459.98	5898.72	7487.8	5781.91	4036.84	4336.02	5543.43	4881.91
1	27	4	83I24	SMLA27H05	726.427	1689.13	851.186	234.98	330.354	230.031	210.003	545.043	369.738	581.357	605.275	2459.12	183.793	303.336	246.889	326.181	362.24	232.367	571.511	158.95	430.219	267.337	324.263	350.368	544.62	450.702	241.11	292.576	427.832	494.567	482.478	332.294	544.69	445.572	304.877	294.512	167.698	787.679	694.112	554.954	450.417	605.511	344.991	166.066
1	28	4	83M24	SMLA30E08	4714.66	9223.34	4608.98	16306.2	37460	43387	28424	40262.1	24571.6	5113.14	4171.06	6947.89	33709.5	41308.3	23863.5	25239.7	45183.3	22181	35723.7	20548	45799.7	42628.8	34627	45948.7	18455.8	25400.4	29620.5	8478.23	5442.09	9294.7	39714	27263.2	48683	12185.9	13085.8	6976.4	14291.5	56060.3	30028.3	19061.4	20200.5	15565.4	18636.5	22805.8
1	1	5	77M12	CONTIG7812	1184.4	1667.04	1087.84	1909.65	2459.98	2482.42	19288.7	20495.8	17181.3	2169.53	1747.56	1720.7	11753.1	4200.98	2163.84	4968.97	4784.5	2461.97	6761.82	4729.88	9458.53	8169.19	9800.93	13221.3	7969.43	6119.76	5548.07	1190.72	1245.36	1503.04	17279.2	9692.79	9093.17	4479.58	5831.29	3631.94	7333.16	15394.9	9622.14	3914.62	3508.88	2832.63	4132.62	4367.94
1	2	5	77A24	CONTIG7463	389.721	600.824	352.719	64.6517	98.4585	129.23	100.041	264.967	236.566	511.971	477.311	430.755	317.852	274.511	229.475	306.301	446.153	196.92	266.185	160.997	369.661	300.663	423.018	509.702	373.436	239.387	207.031	150.22	187.642	164.332	297.755	213.422	322.621	260.22	217.959	464.162	81.2862	258.121	215.827	166.574	122.016	419.39	151.575	238.249
1	3	5	7.7e+25	CONTIG7585	490.888	537.046	630.903	309.499	596.469	769.163	825.02	1309.59	1055.68	951.01	956.042	826.715	674.838	505.422	398.526	794.036	671.168	366.24	496.686	396.369	869.99	385.84	406.073	602.33	1373.01	863.517	729.867	757.451	903.525	947.342	852.211	683.366	1146.52	862.856	580.556	652.923	576.227	3802.63	879.854	606.328	770.63	1084.08	415.941	381.951
1	4	5	94A12	mCD036876	53.4577	128.856	96.3274	79.5519	210.265	156.168	506.063	239.645	56.2009	1227.4	1184.07	729.039	254.013	269.278	209.272	381.722	301.755	207.685	252.794	71.326	460.607	142.171	214.301	308.293	528.918	434.124	233.733	562.5	374.242	336.653	449.581	243.819	366.861	86.9267	20.5674	132.92	96.9237	473.468	244.362	215.555	134.156	241.869	106.736	637.074
1	5	5	77I24	CONTIG7711	559.724	607.205	752.729	293.561	700.158	347.185	585.854	716.887	727.149	1170.58	1136.44	1129.5	1010.05	629.642	366.241	909.213	1232.63	480.251	1042.19	388.334	1205.7	790.135	921.043	1182.08	1373.74	1009.83	934.779	825.772	1210.03	1102.52	1029.56	670.557	1002.87	1205.68	1137.26	925.348	987.745	2392.73	1757.57	1233.52	1224.33	1461.88	699.078	506.188
1	6	5	77M24	CONTIG7827	1161.03	1611.31	1290.69	296.246	454.097	481.644	192.404	372.86	380.114	455.113	440.924	336.356	395.836	390.828	253.076	710.176	801.388	341.551	406.807	278.408	489.326	269.861	437.555	491.428	787.482	428.246	225.04	323.898	518.791	473.767	421.699	309.259	518.602	490.516	350.825	318.581	171.811	675.686	365.306	312.046	294.467	363.603	316.362	139.472
1	7	5	emp	emp	128.639	64.7928	119.056	25.6766	196.297	41.8922	33.685	61.9969	41.5676	289.949	168.4	9.1795	53.8444	37.6584	154.271	147.469	108.566	15.2461	59.0501	70.3753	114.055	61.2732	115.784	69.2235	23.8588	27.3204	48.7363	267.988	158.873	53.5513	18.6708	28.6595	37.4272	86.2647	106.53	41.4567	28.2921	62.0887	99.6222	47.7085	154.569	255.365	249.584	730.855
1	8	5	78A12	CONTIG7929	1965.51	2851.28	2028.61	569.389	853.052	1199.69	1138.04	2870.61	2111.1	2310.74	3261.69	2836.21	3393.54	2291.94	1016.73	2831.64	3108.15	1629.83	3113.63	1402.72	3356.03	2195.34	2531.73	3110.14	1869.51	1224.94	885.877	610.316	1026.07	733.567	2129.84	1258.94	2669.5	1359.77	1915.44	1139.16	883.455	2404.34	1835.05	1028.46	857.458	1683.59	719.714	278.637
1	9	5	78000000000000	CONTIG8040	711.146	1010.66	621.77	717.954	1240.39	1274.98	2614.57	3343.23	2296.27	426.723	438.257	504.928	12619.4	6916.13	2883.17	3089.66	4837.01	1838.78	3053.91	1948.44	4640.36	3959.26	4281.88	5461.92	1218.78	1297.07	1371.62	342.874	347.717	407.684	7652.44	2941.64	4205.85	1915.34	2392.3	1460.71	1063.87	3513.88	1764.1	1239.6	1104.17	761.403	1069.06	844.595
1	10	5	78I12	CONTIG8169	1311.62	1789.71	1252.06	2563.39	4168	3940.37	7509.38	9058.35	6812.3	1194.41	920.256	1336.43	23337.5	11679.2	5309.18	9087.43	16095.2	6081.8	12582.4	7403.58	17388.1	16506.7	17979.3	24148.3	7790.02	8375.95	9740.25	968.961	938.42	1210.95	16005	7167.67	9884.91	1854.16	2465.92	1552.67	4610.84	15445.3	8686	2585.76	2200.4	1858.24	2080.17	2036.55
1	11	5	78M12	CONTIG8293	2342.08	2146.11	2652.34	616.522	1224.07	1615.57	2529.73	2997.23	2151.21	3117.96	4840.3	4936.75	2073.41	1574.04	661.583	1874.38	2741.09	1195.09	2841.77	1552.52	4574.2	1579.14	2283.24	2586.04	3880.73	2451.86	2425.18	1479.94	2590.12	2473.03	2524.18	1376.94	3098.39	1957.8	1670.13	1044.62	1127.58	3056.93	2388.42	2619.81	2444.77	2075.35	1658.56	1712.95
1	12	5	78A24	CONTIG7942	1493.17	2320.13	1458.71	292.404	891.076	554.973	1840.49	2007.62	1618.18	336.73	451.457	508.102	355.019	209.739	160.547	475.176	485.597	287.572	484.394	393.178	679.507	701.665	780.572	950.414	757.481	364.842	308.976	266.682	363.763	416.331	5574.98	2246.61	3244.75	825.002	984.535	694.612	457.644	1263.31	804.965	486.763	397.42	256.895	586.794	311.001
1	13	5	7.8e+25	CONTIG8057	14524.9	18901.7	12300.8	21816.1	36257.9	49408.8	59003.6	58097.3	50318.5	25093	23549	33706.5	39760.7	35689.5	17923.4	47119.1	64829.2	36244.8	73259	59938.2	51681.3	53993.1	50032.9	59007.3	59916.6	55891.9	74879.5	47436.6	50676	45391.3	61414.9	39942.1	61061.7	71136.3	74578.8	50026	56594.7	71998.5	71787.2	59193.7	60902.2	40583.7	69350.1	57923.7
1	14	5	78I24	CONTIG8188	1640.66	2774.77	1772.93	991.905	1715.78	2027.49	3746.82	4701.07	3558.71	1052.85	1094.58	1257.73	3856.74	2926.24	1146.02	2852.75	3737.49	1679.11	3127.85	1657.63	3797.16	3559.94	4109.62	5351.49	2193.45	1568.47	1642.11	474.659	735.562	680.915	5417.88	2072.05	2902.13	1815.87	2273.29	1491.31	671.647	2456.04	1408.11	677.893	688.023	984.579	850.18	541.639
1	15	5	78M24	CONTIG8308	337.988	571.757	517.854	234.33	565.37	439.701	416.657	690.817	474.58	543.625	661.349	517.008	1161.3	838.163	339.194	981.62	1649.5	610.111	1154.31	534.276	1763.57	891.384	1118.35	1353.6	827.045	585.306	584.207	354.304	594.037	575.199	1795.77	717.141	1225.84	1324.94	1398.09	1112.8	274.803	1019.07	821.699	717.991	622.815	534.609	329.763	114.846
1	16	5	79A12	CONTIG8411	69545.2	72842.8	75173.7	2797.73	3657.25	6948.72	5074.96	12980.7	8491.24	5409.52	7663.69	7539.96	23261.2	21603.1	8979.18	16958.6	34361.8	26757.6	12846.8	9924.25	17796.9	23342	19685.8	25079.3	8408.36	8320.83	7566.87	4252.03	4197.34	5753.35	14318.8	7426.59	12947	7065.01	11179.2	4656.75	3868.89	6751.7	3229	6785.52	6099.06	3064.61	4880.73	6120.47
1	17	5	79000000000000	CONTIG8533	489.506	789.681	510.709	175.597	569.069	458.154	674.094	1175.48	818.262	497.267	570.793	721.789	986.985	800.5	421.434	715.635	1288.13	486.985	1297.92	562.706	1931.72	1928.82	1806.01	2345.32	680.084	753.858	844.815	442.238	369.533	588.072	2984.99	1206.42	2030.21	377.243	535.404	404.161	726.877	2863.13	1469.03	591.88	473.599	442.963	540.176	386.432
1	18	5	79I12	CONTIG8655	401.752	645.227	272.153	312.173	558.979	606.228	642.449	1170.4	768.222	180.731	282.414	312.755	897.013	794.697	388.447	604.55	1308.65	346.751	1465.13	854.199	2504.78	1984.47	2002.5	2327.84	868.186	1104.44	1234.05	395.38	336.067	489.063	4371.64	1650.17	2781.8	260.275	442.299	355.189	225.929	1726.48	783.044	662.235	554.553	333.002	784.516	781.081
1	19	5	79M12	CONTIG8771	606.06	754.955	485.916	152.763	208.15	195.626	162.203	201.226	184.599	165.706	191.756	518.554	246.268	240.012	105.801	312.008	415.723	231.534	296.797	208.074	393.213	273.26	175.981	212.691	259.771	245.827	168.956	177.26	171.749	148.643	343.921	244.94	277.62	228.24	271.484	135.238	227.005	563.789	226.598	106.807	131.3	171.964	113.929	229.311
1	20	5	79A24	CONTIG8427	2981.56	4743.48	2322.3	1075.23	2526.16	2794.41	2911.15	5249.17	3524.7	736.963	944.346	1145.04	4974.53	3990.29	2034.28	2314.1	3908.79	1533.88	3093.44	1549.45	4412.66	4064.9	4078.9	5693.05	1288.58	1022.02	1277.23	524.551	520.76	698.301	7237.98	2704.96	4675.82	2213.78	2793.86	1506.72	260.277	1226.48	666.083	1136.42	990.263	487.623	426.62	270.98
1	21	5	7.9e+25	CONTIG8552	836.201	1422.05	784.731	1195.66	2990.64	3037.55	1791.62	3420.09	2053.39	779.505	709.187	861.906	8527.68	7805.88	3537.3	3656.8	7940.9	2607.43	18716.6	9452.38	24941.6	27750.1	25140.2	31915.6	13156.9	17297.5	18859.2	2620.77	2088.32	3374.41	48256.4	27773.7	44862.4	10146.4	15325.2	7488.68	25724.6	65500	43817.3	25329.4	26196.2	20233.2	11156	11150.4
1	22	5	79I24	CONTIG8669	1045.66	1763.04	930.067	292.514	796.106	728.349	606.06	1202.41	613.725	220.64	1354.8	258.985	710.084	774.339	333.771	827.096	1558.01	564.784	890.326	423.253	1355.89	1339.65	1602.73	1753.46	341.776	537.004	703.632	215.608	182.23	242.309	1817.25	661.274	1038.17	838.091	904.807	591.585	147.537	781.898	478.514	288.989	140.984	235.209	670.229	454.382
1	23	5	79M24	CONTIG8790	329.582	588.792	384.874	115.778	446.861	312.545	304.468	486.08	276.284	229.151	222.814	834.497	447.567	420.904	317.021	555.099	1034.12	513.255	698.03	340.512	771.503	1658.08	1560.26	1921.49	442.994	652.772	677.422	199.406	192.542	217.654	5610.79	1831.21	3018.44	356.486	309.005	429.696	377.708	1818.97	814.256	271.366	164.091	207.522	214.935	245.886
1	24	5	80A12	CONTIG8865	680.182	1357.85	686.647	524.175	811.476	960.186	811.136	1513.91	907.497	1242.04	1720.14	2414.36	1285.86	1309.65	734.678	1129.79	1559.02	856.798	1665.59	965.773	2240.07	2301.84	2348.74	3272.26	767.718	610.353	543.23	262.224	403.796	464.38	2777.82	1175.76	1620.53	2190.65	2353.4	1422.57	458.066	1675.55	1173.67	600.726	688.869	768.233	482.593	306.545
1	25	5	80000000000000	CONTIG8992	2406.95	5099.79	2290.95	7211.71	16874.4	21144.3	21608.4	35734.2	20607.4	5815.39	5232.48	10373	2801.54	2995.87	1755.27	2172.64	2848.05	1344.77	4817.19	2204.74	6024.43	7882.2	6981.7	9901.14	5851.09	5594.62	6618.74	4645.52	3537.19	5628.72	31911.1	11194.4	26103.1	6561.99	7197.22	3583.05	4177.32	19801.5	9999.38	4790.83	6564.5	7343.31	6380.21	7452.61
1	26	5	80I12	CONTIG9110	4947.28	8780.95	4529.01	7175.53	15260.8	19975.6	16009.2	23861.1	14066.9	2338.17	1688.27	2745.34	9070.08	10189.1	5206.68	6946.57	10583	5398.92	40637.2	27347	40439.6	45425.4	40990.7	48021	15807.3	18721.4	24383.8	11000.3	6840.77	12553.5	48691.9	38423.6	54246.2	58276.5	56699	34103.3	11977	45085	24477.8	46106.6	46769.6	37624.7	6799.9	7822.13
1	27	5	80M12	CONTIG9243	92877.2	99273.3	79231.2	43097.9	64363.5	62071.4	61034.9	76768.3	64150.3	25658.9	26967.9	36401.4	70224.8	79021	67640.9	74754.2	77340.1	68836.3	71101.4	63374.1	70721.6	66163.6	62180	61223.5	69557.5	85548.7	66426.1	64141.2	51658.6	65598.9	68604.8	55550.9	63623	24709.6	34508	16866.8	35175.7	64585.1	49734	26342.6	34932.6	24827.9	24071.5	45940.5
1	28	5	80A24	CONTIG8882	26332.4	47686.1	25098.4	1204.17	2252.09	2940.69	2518.95	4368.04	2665.28	2229.71	1716.34	3207.98	4209.81	5937.7	2490.26	8261.95	13303.2	6977.03	12874.5	5814.67	16489.5	9752.66	9977.12	14193.2	1924.16	2326.69	2717.04	1704.86	1182.96	1872.75	10620	3782.99	6070.68	1546.92	1615.76	1020.43	328.437	2185.83	1343.36	58.3854	1581.83	1739.01	1394.57	1290.66
1	1	6	74000000000000	CONTIG6062	992.482	1426.34	1033.35	240.855	287.082	378.906	631.586	939.678	709.854	1017.46	936.873	876.504	1672.12	720.862	308.151	968.043	1091.41	511.637	1089.07	627.473	1296.59	1921.21	2545.19	3403.43	1300.73	1056.64	835.65	2122.06	1654.68	2323.64	5989.91	3302	2757.8	3432.25	4366.52	3197.2	895.694	2430.8	1212.62	3692.34	2981.31	2640.14	314.999	332.338
1	2	6	74I12	CONTIG6185	1579.91	2220.59	1838.9	990.377	1299.57	1436.03	3553.34	2977.25	2676.75	1264.69	1298.51	1095.56	5461	1722.76	966.697	3397.28	3952.23	2012.3	3210.51	2324.08	4527.29	3449.21	4152.89	5720.99	1670.92	1147.37	1290.28	1469.68	1373.47	2009.91	8487.8	5225.21	3892.87	2982.76	3921.69	2826.66	1261.84	3122.23	1873.17	2147.32	1896.98	1054.58	1424.94	1244.91
1	3	6	74M12	CONTIG6317	1557.59	2033.3	1393.03	588.284	592.461	739.067	2493.02	3467.73	2404.85	841.232	1145.04	1031.31	4664.71	1195.99	573.191	2690.71	3249.53	1542.12	3815.33	11361.6	5714.4	5151.02	7184.7	9820	3558.61	2813.33	2316.56	2874.47	2178.53	3153.61	8768.83	4055.64	3922.34	415.193	360.234	309.468	926.875	2323.41	1110.51	754.742	586.056	445.263	1575.89	1670.31
1	4	6	74A24	CONTIG5950	597.661	729.442	630.992	167.332	414.168	245.034	211.626	384.488	212.296	1527	1686.43	1913.9	527.987	333.135	286.663	907.412	556.329	298.535	573.156	386.97	1046.82	585.473	748.496	793.604	1183.15	524.408	292.552	448.491	462.35	498.551	853.121	483.497	611.348	506.635	522.795	370.249	345.919	883.656	533.725	414.249	383.167	389.511	182.906	123.091
1	5	6	7.4e+25	CONTIG6078	5291.85	6953.04	6742.63	342.99	451.918	736.355	1400.93	1550.28	1179.28	1331.16	1189.74	1464.15	3034.64	943.314	487.87	3972.23	5033.53	2872.6	1890.84	963.87	2410.58	2481.48	2975.68	3625.93	1026.54	790.929	609.71	1077.55	896.342	1236.77	3359.76	1243.96	2193.47	645.5	937.803	579.865	697.79	1481.72	1065.85	789.869	720.167	715.064	530.464	411.53
1	6	6	74I24	CONTIG6199	2008.06	2777.02	2330.63	3882.99	5085.13	5053.55	18068.9	20334.3	16703.1	3495.5	2731.55	4078	20792.6	8840.56	3413.06	5375.99	9068.73	3395.17	9990.66	5428.78	14786.3	12476.5	15306.4	18943.9	10364.4	11365.5	11311	6710.9	5629.54	7491.94	37896.4	22416.2	23699.6	3395.69	5118.54	3504.86	10600.9	26198.1	12454.8	8902.65	7592.35	5723.42	8037.76	7466.56
1	7	6	74M24	CONTIG6331	671.032	1025.45	848.633	931.631	1460.61	1603.07	2719.85	3635.2	2865.05	975.287	1047.44	1352.11	2292.98	1255.59	674.778	2200.92	3135.7	1179.04	2303.7	1168.9	3194.4	2937.12	3724.25	4860.29	1588.03	1294.38	1201.88	621.268	670.934	766.664	5873.97	2807.25	3204.04	1744.38	2142.54	1540.3	790.839	2308.64	1496.96	1708	1435.78	784.403	360.199	250.172
1	8	6	75A12	CONTIG6413	9150.2	13786.4	10486.4	170.588	357.189	464.581	465.98	757.342	661.768	4820.34	5380.19	5638.7	1913.82	1104.51	554.841	2028.52	2891.56	1403.45	1684.37	814.964	2377.05	2129.44	2565.37	3860.41	1600.69	1087.43	858.117	1224.91	1320.44	1814.63	7233.68	3243.41	4300.26	792.022	1073.66	850.681	446.814	900.373	752.401	695.581	455.364	554.69	376.058	124.386
1	9	6	75000000000000	CONTIG6541	1088.58	1428.22	1044.34	1739.91	2637.74	2954.98	4434.54	5658.14	4096.64	428.232	340.381	386.259	6691.74	4004.6	1624.56	3371.26	5951	2202.25	4055.71	2237.09	6154.88	4741.35	5823.05	7182.75	2755.38	2812.54	2936.45	369.863	363.249	576.978	8877.34	3428.52	4223.42	1862.59	2669.25	1771.14	2027.53	5968	3230.06	2127.33	1660.94	709.453	1254.44	902.389
1	10	6	75I12	CONTIG6678	4192.96	5509.4	3899.94	6670.36	9322.25	9877.63	18110.8	18602.9	14779.7	3729.95	3248.08	4680.32	20645	11119.3	4297.25	11315.5	19009.6	7836.23	14794.6	9864.09	22702.6	16753.2	17769.6	22774.4	6219.92	6994.19	9180.08	3748.12	2853.6	4741.9	42758.4	25327	30088.5	17766.7	28925.3	16386.4	14918.6	43773.1	21370.4	20773.2	18646.3	7290.35	18116.7	18220.5
1	11	6	75M12	CONTIG6797	2066.32	3278.05	2205.13	2646.09	4210.36	4826.08	6637.02	7061.24	5344.22	1006.11	954.402	1187.91	8579.23	4424.23	1701.34	3873.75	6923.48	2742.19	9307.32	5915.33	13335.2	7078.06	8686.53	11374.7	2182.83	2332.94	2795.62	1153.21	955.758	1433.55	15237.2	6385.03	7378.81	11457.3	17644.8	11158.9	1543.58	4443.54	3308.47	9198.66	6581.66	1298.6	2716.95	2206.22
1	12	6	emp	emp	96.7124	30.0608	87.913	14.6604	233.267	106.48	32.0932	149.032	122.144	61.3084	93.5185	29.3802	72.3026	76.2257	164.877	70.1228	47.6379	76.1912	108.249	112.286	85.9873	66.4752	21.2571	49.1769	15.0743	190.048	94.1745	18.2634	103.633	68.6513	73.0947	123.748	99.4903	63.829	20.1853	251.044	40.7192	10.7294	114.313	125.967	77.6081	150.427	216.193	407.689
1	13	6	75A24	CONTIG6429	1686.79	2558.59	1553.31	1614.74	3218.2	3329.01	4537.09	6115.21	4516.35	1048.32	1247.38	1695.69	3632.63	1930.04	863.403	2929.89	5765.53	2283.08	5899.92	3020.95	7642.5	6182.24	7222.51	10028.4	1659.3	1671.38	2067.4	1623.76	1259.7	2024.98	7093.13	2617.42	4666.84	3930.45	5200.73	3178.17	733.678	2260.66	1518.27	1429.99	1395.57	553.646	1666.45	1368.35
1	14	6	7.5e+25	CONTIG6556	378.376	529.184	416.352	97.0592	185.077	115.287	70.3129	189.585	127.731	564.712	585.563	928.343	228.17	150.479	160.415	264.786	201.992	105.819	222.799	231.747	283.818	1111.2	1123.02	1563.14	466.719	526.541	652.108	424.27	322.662	530.243	6298.06	2283.84	4117.21	881.615	850.133	452.83	390.045	1418.19	1001.84	439.282	537.162	317.542	89.3971	112.291
1	15	6	75I24	CONTIG6694	5032.43	7036.82	5024.34	14591.5	26421.3	28842.2	37963.5	42155.4	33361.1	4821.2	3845.3	5256.74	31485.9	24511.3	10234.7	16539.6	26102.8	11620.4	30910.4	21059.7	40451.7	35687.1	35949.2	45380.2	21128.8	22634.7	27166	11488.6	8907.16	13757.5	49559.3	33410.1	49527.2	22960.2	33059.3	17826.8	16797.8	52262.1	29392.1	22226.2	21138.5	14427.3	32866.5	34288.8
1	16	6	75M24	CONTIG6809	2165.81	3163.02	2272.74	2746.75	4910.52	5884.01	8030.96	11485.2	7004.33	4260.33	4142.72	6555.44	8259.82	6059.24	3264.18	7226.76	10162.7	5624.25	10900.6	4965.85	10728.3	10644	10533.2	13844.2	7074.46	7087.42	8815.87	6458.5	5112.95	7047.74	21384.8	9533.5	20304.2	8734.05	10227.4	6799.56	7987.91	19875.5	13649.1	6944.63	9618.47	7222.64	6718.62	7076.63
1	17	6	76A12	CONTIG6932	1103.6	1085.87	1513.3	461.002	950.583	805.734	735.275	1176.09	896.015	1240.02	1506.67	1809.56	1057.68	1176.15	699.878	1536.21	2175.4	899.489	2171.75	772.901	2757.42	1234.25	1296.13	1576.89	2254.38	1853.59	1974.71	1555.31	2271.52	2582	1288.56	879.476	1779.15	1413.93	1153.19	847.592	740.634	2485.6	1697.22	2161.36	1764.06	1923.05	1104.62	690.303
1	18	6	76000000000000	CONTIG7054	790.153	1232.2	651.032	191.967	424.02	279.967	237.414	321.767	316.642	341.92	356.908	490.241	668.203	531.191	260.343	607.651	891.154	377.487	840.466	430.688	1214.1	1454.02	1560.61	2069.78	527.135	520.16	649.589	382.794	371.516	537.705	2704.55	1055.62	1729.42	1961.91	2299	1303.78	456.559	1578.29	900.279	1004.7	991.694	594.942	338.37	134.236
1	19	6	76I12	CONTIG7175	295.123	424.307	213.769	190.57	281.668	338.22	188.786	363.105	343.026	457.192	521.834	800.643	657.763	917.787	664.801	826.97	888.653	464.458	495.102	215.718	415.388	355.768	327.931	298.421	358.805	407.745	165.345	203.942	293.005	244.219	475.818	206.627	336.619	275.158	191.364	295.109	203.948	643.806	586.389	284.012	325.712	421.38	182.287	114.951
1	20	6	76M12	CONTIG7295	943.919	1666.28	983.097	377.525	737.995	867.11	1667.42	2972.36	2273.5	519.06	686.142	877.568	818.801	875.081	350.821	2895.97	5321.35	2128.76	2821.44	1549.36	4552.04	1825.94	2182.59	2784.77	819.817	677.066	845.437	531.932	398.946	617.815	5536.02	2562.36	2867.36	4297.2	5244.89	3442.02	234.43	1057.16	808.397	800.784	597.554	366.141	762.259	590.78
1	21	6	76A24	CONTIG6948	2168.12	3025.58	1757.52	8820.05	18977.5	19137.5	23886.7	32481	22465.9	1598.63	1062.04	1861.36	19063.6	17447	8019.36	6390.3	13119.7	4932.68	13857	7586.23	17943.1	13454.5	13281.7	16445.6	4023.04	4545.14	7067.87	911.568	640.132	938.15	40052.9	19334.6	31646.4	12541.9	18674.2	10267.8	18039.2	61205.3	33352.8	10918.3	11971.1	6906.21	29632.7	33756
1	22	6	7.6e+25	CONTIG7068	686.354	1062.87	602.673	125.696	344.291	186.265	307.765	528.54	328.396	604.558	655.013	796.732	358.596	403.373	374.44	374.578	460.413	370.339	426.662	188.607	401.826	374.219	512.426	687.34	424.864	348.985	353.913	307.565	376.697	433.402	2553.86	920.339	1570.42	1136.34	1253.16	615.275	391.627	1761.91	1067.46	1271.97	1446.53	1772.71	540.423	293.135
1	23	6	76I24	CONTIG7193	12426	21557.7	13695.9	47406.3	57908.4	81683.5	48856.9	49298.6	40990.9	6204.13	4471.05	6524.36	40510.6	52606.8	47643	71992.3	65807.9	55982.5	62649.3	49933.6	56499.6	46550	51151.2	55993	47048.8	49327.2	64751.6	8134.5	5047.12	7906.34	55052.8	40318.3	61411.3	15785.8	21763.5	12386.6	33030	62623.4	64189.4	28040.4	27591.6	34376.3	51432.4	44779
1	24	6	76M24	CONTIG7313	6595.02	11342.3	6867.13	1319.38	2454.15	2747.2	2045.97	4022.49	2603.99	2989.43	3317.04	3828.12	2984.5	3537.06	1741.65	6905.77	8314.83	4475.07	8051.88	4173.67	9276.57	5259.87	5762.43	7352.7	4125.46	2923.37	2667.18	2528.16	2623.31	2978.13	9233.36	3406.99	5477.01	3217.51	3920.38	2460.41	1047.55	4608.21	2959.29	2921.93	2838.04	3113.14	2332.73	2500.77
1	25	6	96A12	SPOTTINGBUFFER_A_12	48.3687	112.564	158.907	47.8474	205.305	20.6439	50.6152	107.155	172.147	67.466	193.983	617.551	87.5883	50.5139	141.718	69.4751	205.662	85.9625	17.6622	37.3586	15.5697	19.2912	23.2278	30.8896	62.8523	67.4514	58.563	97.8669	107.672	99.88	83.1164	38.4229	144.047	65.7528	23.0317	11.5371	52.8168	50.8014	62.5568	62.0811	55.0998	79.7813	332.602	352.626
1	26	6	77A12	CONTIG7449	1078.69	2170.78	990.487	1058.34	2456.67	2759.87	2637.62	4007.72	2240.81	559.525	552.329	705.438	2155.48	2556.69	1494.56	1565.22	2012.64	1053.79	2973.41	1470.42	3942.34	4342.2	4265.06	5897.58	1380.75	1526.94	2199.78	878.663	573.679	959.955	11650.6	4674.45	7555.82	2876.5	2806.7	1950.5	1269.24	5488.3	3342.79	1559.85	1855.71	1630.25	2241.86	2169.17
1	27	6	77000000000000	CONTIG7569	4386.16	7696.12	4266.95	7027.18	13746.1	17513.9	12859.6	18604.1	12061.3	5224.66	3890.16	5402.49	19451.9	25303.6	12128	18048.4	27630.2	15292.8	34728.2	20672.7	44350.7	33939.8	32021.6	43862.4	23962.9	26183.6	38629.1	20217.6	12088.9	20549.6	43668.1	23699.6	30684	22301.8	26994.5	16216.2	6522.4	28362.6	14652	20901.2	25402.7	11011.8	9816.85	10651.5
1	28	6	77I12	CONTIG7689	2187.14	4990.21	2044.21	641.345	1377.3	1807.45	1784.85	3614.45	1959.26	1601.76	1679.11	2266.25	262.78	257.49	218.596	292.766	281.825	196.854	521.535	203.896	722.513	503.091	590.204	880.352	494.747	316.009	393.576	863.502	571.008	928.177	4180.86	1418.6	2637.13	338.661	287.073	258.077	149.712	665.102	355.449	243.055	211.032	284.138	882.359	857.002
1	1	7	70M24	CONTIG4334	1369.15	1776.6	1579.65	78.6562	299.628	77.7757	153.672	220.662	159.438	250.105	242.689	212.176	287.947	168.614	90.8863	420.742	414.284	186.843	220.555	175.327	335.357	198.042	346.955	369.675	213.022	118.416	102.803	116.864	167.119	107.908	222.312	125.032	159.424	174.022	181.041	141.692	122.705	223.211	189.672	120.776	175.981	76.6004	123.801	160.55
1	2	7	71A12	CONTIG4457	2675.97	3871.87	2630.88	4221.53	5554.06	6637.58	11841.3	12313.7	9257.35	5010.62	4723.18	6350.59	19004	5223.81	2902.41	30512.3	35380.5	23769.5	54575.2	40131.6	54063.9	43783.9	42352.1	54387	20210.7	18155.6	16033.1	7709.48	6667.29	8962.74	22345.5	10404.2	14079	12948.4	17311.5	9361.21	7049.9	13278.9	7405.42	11211.7	10740.7	8087.05	1027.76	1128.24
1	3	7	71000000000000	CONTIG4583	1446.74	2118.88	1522.34	2444.28	2611.98	3663.19	5042.27	5730.47	4886.32	1478.32	1131.7	1593.04	10733.4	3264.24	1814.8	6405.87	7918.22	4352.29	4328.46	2531.66	6468.97	3800.69	5329.47	7827.87	3353.81	3158.4	2563.89	1943.37	1477.69	2041.3	7073.25	3527.59	3234.77	1093.53	1406.58	1113.79	825.983	1848.64	1229.52	1675.49	1401.97	1007.8	1822.58	1511.44
1	4	7	71I12	CONTIG4713	812.774	1001.67	851.283	1509.08	2125.57	2252.6	6842.4	7942.35	6013.86	1125.6	1195.86	1047.86	362.975	348.133	322.688	563.093	415.127	243.088	403.888	257.152	538.688	664.652	850.887	969.825	1131.19	669.232	726.927	485.885	551.908	634.196	6572.23	3024.55	3092.29	2681.36	3422.45	2392.23	1505.36	3712.65	1851.71	1844.79	1475.99	1253.24	466.301	313.576
1	5	7	71M12	CONTIG4841	282.9	445.352	434.589	615.612	979.912	845.16	3224.73	2686.43	2019.5	570.682	630.133	423.347	5528.04	1304.19	748.854	1209.89	1951.66	881.013	680.562	462.378	887.512	2038.13	2517.81	2603.52	611.805	845.544	742.225	277.548	141.946	285.773	8055.81	3602.56	3155.65	519.495	705.715	486.008	1463.67	3719.57	1791.31	724.398	610.811	436.137	198.568	312.685
1	6	7	71A24	CONTIG4470	12003.1	17274.8	13466.9	1525.84	1798.41	2112.99	12022	17886.1	16925.5	3132.08	3552.21	3495.1	4591.64	1393.26	716.86	1519.63	2001.93	1075.38	773.376	313.057	1060.4	1204.6	1874.76	2058.77	1154.29	899.167	543.655	223.824	265.757	261.809	378.674	324.938	317.408	185.503	196.731	160.213	170.403	189.117	203.458	215.818	163.933	242.514	124.243	82.6374
1	7	7	7.1e+25	CONTIG4595	6682.56	9274.43	8135.62	12037.1	15340.9	20179.9	31064.2	31264.6	27669.4	6485.28	6025.33	6424.54	23327.5	12759.7	4024.81	14914.4	18929.1	9175.46	26327.6	15762.3	37256.7	18611	22939.8	26652.8	9861.8	8476.86	9804.34	5292.16	5293.39	6704.89	49898.9	29591.3	23568.3	20431.5	34122.3	19963	7249.17	22156.2	13648.3	30403.4	20719.7	11382.4	25238.9	20108.2
1	8	7	71I24	CONTIG4733	7214.71	10620.4	7956.43	882.853	1126.17	1963.9	1585.64	2856.87	2140.48	3203.47	3983.69	3595.32	1725.92	1858.55	970.359	3563.8	2722.81	1627.24	3240.32	1099.33	3492.06	1687.59	2320.43	2442.66	4605.23	2531.58	1588.09	1372.52	2102.06	1810.45	1622.26	1447.31	2582.36	1346.38	1712.15	1306.66	707.097	2890.73	2030.57	1484.44	1224.67	3251.22	1131.61	607.281
1	9	7	71M24	CONTIG4853	4906.73	6173.7	5089.68	1247.08	1691.87	3101.81	4094.61	5253.96	3859.62	2216.5	2113.31	2452	4416.76	2996.63	1091.9	3450	4545.01	2242.48	3915.22	1618.99	6122.24	3679.56	5280.95	6743.76	3737.64	3434.26	3370.5	1429.64	982.987	1529.98	7267.29	2714.36	3497.57	714.36	1017.58	798.799	1196.59	5061.67	2778.68	1538.07	898.897	965.826	2252.43	1962.2
1	10	7	72A12	CONTIG4928	2146.91	3265.65	2166.92	6304.09	8778.52	11484.7	15624.7	16886.6	12609.1	1606.37	1749.34	1883.52	12833.2	6527.68	3002.76	5327.2	8312.08	3867.48	10972.6	7406.45	15162.2	12190.5	13928.1	18260.2	5867.76	5540.96	6345.02	2073.19	1751.12	2427.74	22091.9	8822.41	12452.3	9477.28	13032.3	7541.37	3157.9	9155.32	5548.34	8693.99	8197.89	4518.4	6736.78	7072.91
1	11	7	72000000000000	CONTIG5046	1227.59	1957.21	1153.82	956.743	1564.51	1922.06	2578.57	3302.95	2483.29	713.977	744.295	870.85	5445.17	2778.35	1301.14	1613.48	2276.12	1104.69	1941.83	2161.48	2281.5	1679.22	2245.52	2699.23	1217.55	915.487	1005.31	1081.17	811.979	1270.01	6497.04	2412.62	3986.53	3515.41	4443.24	2836.45	513.081	1597.63	901.64	1106.29	1197.55	899.783	436.514	217.171
1	12	7	72I12	CONTIG5154	1379.28	1941.55	1330.79	171.567	264.156	278.795	334.099	557.653	369.664	1325.94	1330.79	1831	750.765	615.929	311.438	951.155	910.411	368.898	491.706	365.554	504.297	391.884	546.384	599.053	685.703	404.889	301.608	204.298	425.866	269.055	759.021	396.091	496.787	267.584	274.757	320.595	257.517	667.549	522.189	490.09	684.8	623.113	298.666	142.706
1	13	7	72M12	CONTIG5290	200.875	155.853	321.121	151.075	269.423	77.9425	85.2356	160.797	99.5298	555.478	583.941	586.622	168	231.298	247.9	260.221	395.424	160.658	356.312	250.66	473.493	104.083	268.989	256.124	385.11	407.559	276.414	599.066	507.498	431.241	144.976	129.974	427.416	278.118	61.0304	206.165	106.192	654.08	515.276	332.195	222.026	355.763	133.407	447.016
1	14	7	72A24	CONTIG4944	1133.67	1437.61	1009.4	762.347	1321.47	1144.3	3344.57	3696.19	2715.21	1194.42	1192.42	1720.03	461.113	519.511	269.979	625.787	490.09	240.422	388.997	218.849	306.762	296.755	428.444	436.234	544.935	354.09	146.335	712.455	644.937	844.734	6087.13	2346.84	3672.67	633.062	803.698	490.035	259.979	787.279	668.474	174.191	209.602	421.456	584.252	353.32
1	15	7	7.2e+25	CONTIG5060	205.844	348.64	289.84	161.846	302.964	191.842	340.151	556.544	425.32	691.796	1105.47	1012.32	548.09	468.317	199.994	637.377	1000.84	421.792	559.133	378.38	721.991	669.548	758.922	1012.23	217.043	278.802	174.547	176.371	172.56	185.135	2321.02	931.281	1147.53	373.792	195.045	216.185	273.466	526.262	345.927	274.335	295.114	349.937	125.535	61.3611
1	16	7	95A24	mCA038424	104.851	90.6842	62.0451	133.362	222.443	150.941	102.033	51.1279	88.6872	102.978	261.795	55.4653	40.7218	131.541	148.355	113.933	68.8118	100.719	50.6728	73.5226	37.9884	25.926	197.264	19.7508	97.4169	88.82	174.416	104.051	61.9614	106.7	56.4486	124.283	23.2497	246.818	8.43144	84.6011	160.6	112.265	282.937	39.5164	20.8218	24.6596	67.5926	392.129
1	17	7	72I24	CONTIG5175	2417.12	3527	2840.92	3601.06	5657.85	6483.6	5519.68	6815.79	5430.43	1764.54	2497.96	2212.08	1874.14	1807.27	749.532	2523.47	1962.15	1388.76	8729.11	4111.28	10268.4	9201.57	10151.9	12799.1	6516.31	5721.76	6779.31	1206.04	2039.13	1769.52	12698.6	5135.41	7147.34	11793.1	16945.4	10230.9	2457.29	8423.85	4723.5	8782.25	7896.53	3440.35	6432.56	6490.87
1	18	7	emp	emp	18.0392	33.6565	74.5845	18.685	136.917	177.061	191.567	183.253	149.715	208.974	201.054	70.0264	31.1741	136.129	125.398	76.293	111.73	82.6511	20.1166	58.448	71.4997	57.9456	69.5861	91.2403	14.498	45.9342	76.9846	31.5412	433.972	78.9704	72.5064	152.634	74.927	171.809	20.018	23.7019	334.049	226.301	320.673	184.711	64.3539	211.938	246.504	734.037
1	19	7	72M24	CONTIG5302	653.271	1040.87	707.792	219.454	447.246	341.941	169.076	473.483	283.29	1238.07	1267.14	1546.33	338.036	467.761	309.463	699.137	483.93	289.864	497.22	172.377	494.045	467.186	511.603	608.095	910.323	504.869	394.114	268.555	506.373	353.058	930.632	516.488	638.794	329.5	441.635	226.303	241.102	677.244	479.55	411.133	343.143	646.373	252.978	129.475
1	20	7	73A12	CONTIG5411	6413.93	10362.8	5709.59	1130.49	2447.89	3201.59	2107.05	4376.03	3055.35	1753.2	1486.29	2181.61	4643.84	4168.53	1840.06	4163.13	7793.11	3644.77	6965.96	2916.67	9123.52	6518.49	7249.33	10595.1	2100.56	1795.58	2282.93	4805.09	3229.37	5019.36	11125.5	4540.67	8012.81	3566.31	4424.1	2703.32	569.153	2246.69	1426.4	1543.61	1383.8	1174.67	1631.49	1644.12
1	21	7	73000000000000	CONTIG5524	239.465	113.167	204.184	83.5243	327.757	268.526	223.531	324.206	188.618	1710.04	1729.19	2390.7	173.653	252.285	284.537	379.955	349.083	164.439	506.702	251.755	411.732	275.467	186.432	291.178	522.288	437.272	300.661	307.952	543.159	503.427	440.382	260.066	285.126	374.767	349.886	184.594	42.2768	609.076	535.688	381.475	228.206	593.788	190.259	294.605
1	22	7	73I12	CONTIG5648	47281.5	52715.9	49620.5	1035.18	1638.82	2505.83	2291.97	4736.65	2978.65	4212.22	6173.85	6557.34	5282.1	6464.4	3475.85	9350.73	12567.9	8861.91	6093.46	3049.63	7328.83	8123.2	5950.28	8775.51	3576.35	3707.74	3034.5	1421.62	1494.56	2335.59	4249.32	1859.38	4762.68	3229.79	4408.38	2534.7	1279.33	3046.44	1862.79	2457.95	2678.17	1058.13	1021.21	1108.79
1	23	7	73M12	CONTIG5772	3609.32	2656.69	4243.05	3435.56	2184.14	5530.64	2294.21	2396.8	2023.52	884.535	1110.72	1407.41	298.085	509.891	411.502	912.244	808.001	382.265	890.714	376.174	825.049	354.501	497.357	385.848	1251.62	800.545	585.227	580.739	1025.34	920.169	435.545	378.888	896.383	505.785	323.73	390.085	390.893	567.219	791.719	552.532	530.48	654.435	416.856	300.526
1	24	7	73A24	CONTIG5427	9392.9	18880.2	8711.73	174.404	448.686	545.039	591.894	1171.84	758.535	785.224	830.643	753.825	990.374	1182.45	497.878	1165.55	1810.89	990.996	1593.26	633.165	1668.43	1603.77	1576.18	1724.83	951.56	692.753	583.397	595.552	632.531	779.444	2738.33	968.648	1800.47	451.404	631.638	467.086	255.258	729.372	305.795	470.193	548.437	461.804	421.579	253.492
1	25	7	7.3e+25	CONTIG5541	436.348	434.329	635.562	341.997	523.918	535.558	229.922	810.521	400.214	889.167	794.061	1098.99	379.159	678.823	558.818	1104.06	753.614	547.362	960.193	277.98	666.056	572.188	709.949	552.415	1257.27	740.279	486.415	497.413	950.901	740.137	844.636	579.097	917.069	666.215	414.812	464.254	440.152	1260.42	909.856	601.983	408.442	1282.52	422.056	231.627
1	26	7	73I24	CONTIG5665	1364.22	2203.56	1307.49	2915.19	6797.35	7535.87	2174.23	3995.43	2144.4	1647.19	1825.7	2797.88	1270.35	1478.24	930.064	2144.75	3233.12	1458.4	2675.43	1512.46	3321.07	3432.03	3204.55	4636.09	1357.79	1247.39	1480.05	682.119	617.067	862.31	4137.2	1402.89	3058.72	3331.65	3614.73	2007.96	1457.06	5094.56	2567.49	2674.32	3751.7	2319.81	601.076	590.914
1	27	7	73M24	CONTIG5784	12511.4	21474.7	11107.8	176.823	393.611	372.632	168.286	431.374	245.674	2271.89	2367.63	3385.61	426.119	453.962	260.19	747.998	800.402	556.884	763.503	280.336	797.623	471.02	497.437	668.935	447.609	318.232	167.794	276.145	256.588	335.802	252.603	225.848	197.208	216.102	174.689	201.402	139.459	176.813	144.909	155.225	119.142	114.422	108.987	62.485
1	28	7	74A12	CONTIG5936	699.881	1590.67	719.541	90.573	187.536	156.311	177.666	204.673	109.199	206.417	154.001	404.336	194.28	356.707	157.999	255.909	372.662	189.538	325.263	147.442	375.443	728.656	648.18	941.383	110.962	182.859	131.609	109.497	81.4903	141.27	290.013	119.539	180.123	240.53	284.459	207.345	80.1107	214.233	201.402	133.711	124.033	142.182	130.546	110.297
1	1	8	67A24	CONTIG2391	2089.03	3238.5	2426.86	5250.47	6030.37	8380.11	21310.3	24505.1	18680.2	1104.37	1036.39	1063.78	40987.1	19681	11434.5	23713.1	24782.9	15326.4	15977.8	11558.7	23576.6	17032.1	19675.6	24808.9	14113.3	10588.8	10079.5	1093.56	924.099	1093.13	29252.5	17715.2	16920.9	3769.86	4863.44	3157.46	13869.9	26976.3	14558.3	2912.38	2042.52	2210.83	7918.95	8530.02
1	2	8	6.7e+25	CONTIG2534	1749.48	2333.2	1834.08	1557.93	1544.73	2052.04	6299.06	7175.14	5284.55	3650.82	3073.31	4323.92	2248.99	583.943	418.807	2514.7	2783.13	1602.1	3247.1	2170.88	5149.41	5710.07	6681.66	8977.48	4652.29	4333.37	3713.88	11758.3	10947.7	13014.4	24841.4	10546	15884	14458.1	18662.4	10766.4	12486.2	21239.9	13200.3	7493.02	7713.52	6936.33	1809.13	1913.67
1	3	8	67I24	CONTIG2693	2760.37	2941.57	3032.19	965.475	1272.69	1378.14	2161.56	2696.49	1833.69	1307.38	1040.89	959.64	5534.66	2035.54	606.475	1790	2825.7	1038.47	3616.44	2527.24	6026.79	3394.72	4668.33	5877.78	2135.69	2203.47	2112.46	1490.03	1232.04	1359.18	16095.2	7162.5	6557.35	3164.53	4372.82	3934.87	4475.39	10551.7	4458.02	4801.63	3825.72	1820.71	1387.91	1288.55
1	4	8	67M24	CONTIG2841	3350.84	3607.4	3474.37	7616.22	8097.39	10857.3	33929.3	38155.6	28341.3	2184.15	1637.59	1943.49	2360.47	956.923	382.994	796.027	1051.55	507.145	1739.07	1110.16	2868.56	2090.79	2579.35	3047.9	2926.07	2911.31	3482.29	3333.8	2580.32	3165.83	41010.3	27894	24703.8	1741.42	2086.61	1650.31	1197.26	3821.33	1465.16	2069.36	1317.97	852.145	13784	13501
1	5	8	68A12	CONTIG2921	248.743	227.704	135.746	259.071	295.206	692.141	1083.06	1083.53	612.135	402.872	332.235	350.689	1071.53	450.33	318.126	698.215	1022.4	470.961	1146.85	561.341	1658.61	1299.75	1775.14	2085.13	657.893	691.99	745.129	417.21	242.413	267.86	2897.89	1369.4	1473.49	881.193	947.478	771.488	818.364	2094.08	936.957	801.313	438.986	552.708	300.409	302.153
1	6	8	68000000000000	CONTIG3068	63.568	8.61328	109.957	79.7653	229.087	89.4675	31.4541	58.4372	147.596	141.932	157.397	32.6021	49.4257	54.5195	128.357	117.649	109.139	62.5076	128.141	86.9706	71.0288	60.3239	70.1978	53.2782	45.6772	76.2433	24.665	182.288	169.036	217.861	52.6042	101.118	22.2109	40.6369	25.7429	4.36764	98.0545	38.1938	112.043	87.0671	117.607	138.383	226.682	442.46
1	7	8	68I12	CONTIG3214	381.102	530.639	454.137	50.0016	201.251	165.295	138.587	250.354	253.817	1384.66	1853.13	1818.04	2147.25	908.94	611.107	949.98	1236.07	554.937	562.373	294.919	733.64	1169.42	1565.1	1809.2	942.56	424.05	357.492	160.637	234.307	236.742	231.072	245.869	212.738	396.479	534.389	348.245	389.969	841.747	590.322	533.772	617.954	492.153	153.355	71.1789
1	8	8	94M24	mCD037176	14.8918	76.3509	107.977	93.26	176.323	123.202	46.6435	42.7168	121.678	260.663	364.193	20.0985	28.2372	121.823	145.602	153.523	70.9598	120.988	16.6211	136.157	30.584	115.321	40.1463	26.8765	85.4419	250.043	70.0759	170.747	167.407	111.878	80.7903	77.6112	63.9908	219.687	73.4362	57.284	174.369	93.3074	256.238	109.802	26.6642	120.362	245.384	355.483
1	9	8	68M12	CONTIG3362	267.835	137.035	213.787	86.4821	384.048	216.259	200.762	280.227	219.238	618.442	717.603	678.963	273.499	299.452	312.746	421.686	389.451	233.471	322.675	169.034	409.038	179.136	311.616	250.159	493.751	490.342	276.6	329.125	408.17	468.235	328.946	319.209	328.556	358.371	191.977	406.734	357.288	843.78	574.411	489.126	164.607	487.679	221.27	366.189
1	10	8	68A24	CONTIG2940	8123.72	11812.1	7980.44	416.355	592.411	618.871	1538.73	1778.88	1351.05	925.964	1053.42	1419.16	2638.34	1243.83	586.483	1555.66	2362.42	1116.23	2800.62	1663.28	4112.84	3017.89	3484.57	4723.28	1284.07	1350.6	1504.84	548.006	488.079	806.48	6944.33	2847.69	3854.69	3112.58	3966.07	2414.89	1819.53	5253.44	2575.9	2213.72	2137.85	1642.6	1712.51	1734.8
1	11	8	6.8e+25	CONTIG3085	1435.29	2328.36	1435.59	453.516	634.185	669.892	1644.45	2305.86	1763.21	2494.17	3397.11	3302.54	3991.78	2423.24	1096.37	2037.22	3120.53	1640.49	1817.78	2503.01	1592.94	1427.44	1969.68	2297.4	1856.59	1311.21	1123.74	1057.51	1170.18	1310.16	5071.09	2251.53	4110.7	932.331	952.505	706.651	717.159	1890.83	1672.42	967.051	1079.14	1461.75	596.568	401.719
1	12	8	68I24	CONTIG3238	2476.02	4375.79	2577.97	268.468	612.121	657.841	1293.55	1550.62	1135.81	1188.85	1131.51	1705.06	4718.39	2236.62	1254.96	1196.74	1594.4	1134.94	1914.3	812.179	2204.27	2277.5	2452.1	3699.05	2201.1	2262.44	2486.05	987.585	835.577	1190.72	7857.24	2895.35	6215.16	1818.21	2227.26	1315.64	4000.55	9220.29	6836.54	1824.51	2233.8	1554.6	928.764	1066.74
1	13	8	68M24	CONTIG3377	1267.75	944.605	1480.43	264.917	690.699	689.842	858.978	942.29	725.97	3428.33	4243.41	4816.13	803.832	790.517	522.788	1517.31	1284.66	684.26	2146.34	812.949	2397.91	631.302	826.862	1228	2343.71	1429.09	1239.72	1039.43	1664.81	1608.47	777.851	593.125	1295.55	1116.72	772.556	888.755	525.6	2043.58	1345.16	1299.53	1310.88	1235.95	560.978	738.889
1	14	8	69A12	CONTIG3469	2576.59	3799.97	3408.76	1364.76	2109.46	2986.36	2047.25	4009.3	2963.18	3627.76	5212.43	4576.36	2169.91	2931.18	1595.55	4301.16	3353.52	2303.13	3607.72	1226.38	3299.78	2016.9	2425.26	3045.96	4618.75	2906.97	2254.99	1492.68	2683.69	2285.27	2828.37	2832.31	4119.72	1937.86	1835.93	1702.28	1122.78	4778.88	3661.05	1823.22	1607.97	5085.47	1846.56	1471.94
1	15	8	69000000000000	CONTIG3580	41987.9	55424.6	39404.6	1496.15	1659.47	2481.41	4260.37	6652.07	6346.18	4139.84	4864.57	5880.92	11046	6772.09	3155.57	4092.4	8147.6	4902.84	4329.24	2487.83	5942.07	7080.08	6723.44	8940.17	3072.41	2573.46	2729.77	540.33	792.05	866.424	2378.17	1695.8	2266.65	792.823	1278.29	820.073	1135.15	1655.25	801.018	1029.1	1086.6	711.544	677.064	610.871
1	16	8	69I12	CONTIG3699	1214.5	2004.72	1042.29	1507.67	2658.44	2701.03	1213.82	1565.53	1065.6	240.188	247.076	294.165	11333.8	8058.97	3802.05	1023.4	1651.93	740.843	2424.86	1259.87	3285.51	4931.73	5291.09	7159.22	1182.79	1506.04	1938.19	296.42	296.664	334.556	9903.87	4106.74	5834.52	1274.64	1781.73	1033.76	688.49	2164.86	1202.2	496.729	373.634	485.586	681.989	343.067
1	17	8	69M12	CONTIG3803	62586.5	61285.2	66723.4	1797.87	2831.45	4302.88	3947.11	7131.6	5445.37	2507.45	3749.27	3765.24	8698.5	8390.68	4342.5	9564.68	14243.9	11909.8	8526.84	4082.77	12234.4	14104.3	9719.45	12994.2	3798.87	3543.9	3451.68	1836.77	2385.45	2881.64	6837.12	3483.41	7103.55	3921.54	6441.39	3486.35	1425.37	3098.21	2454.8	2772.2	2436.36	1249.05	2076.28	2367.6
1	18	8	69A24	CONTIG3486	3780.02	5878.81	4325.96	550.852	1005.55	1292.84	987.7	2082.04	1472.14	2241.75	2091.44	2603.02	1729.98	1911.88	1021.67	3037.64	2569.69	1775.22	2595.31	849.559	2594.77	1593.27	1867.43	2351.99	3316.08	2079.75	1464.71	1152.14	1693.22	1705.25	2542.43	1352.87	2454.63	1503.35	1486.58	1197.05	489.577	2389.87	1955.06	1463.43	1208.35	2328.97	734.078	618.859
1	19	8	6.9e+25	CONTIG3597	365.644	615.745	349.046	156.007	267.696	181.026	229.29	525.798	346.998	661.537	664.508	1019.09	200.879	238.878	259.701	309.078	352.023	201.174	365.014	183.443	525.294	311.723	228.777	313.535	318.226	249.974	229.714	222.599	244.967	244.09	486.778	360.207	487.44	150.001	203.707	226.307	131.574	520.135	335.657	371.689	245.083	512.732	229.191	147.504
1	20	8	69I24	CONTIG3711	1352.13	2425.78	1224.29	74.8015	193.089	143.292	115.218	174.56	218.078	876.197	1095.37	1503.9	180.895	244.148	166.958	242.324	418.212	324.899	234.815	118.478	298.301	178.523	284.992	243.223	192.391	133.938	154.42	83.6345	134.553	140.615	244.897	107.989	220.744	139.454	104.593	73.9116	81.9504	140.388	152.058	120.366	110.569	152.245	132.053	49.3493
1	21	8	69M24	CONTIG382	17156.8	28256.7	16206.6	55301.1	71873.1	82419.8	59970.2	63239	54676.5	29619.7	26265.5	40489.5	42402.2	55195.6	50833.5	70905	71004.2	49380.7	57364.7	32131.8	50284.5	44084	42436.9	53167.8	50070.1	47280.6	59013.7	17018.3	11207.5	18796.2	50675.3	30338.8	51092.1	22464.5	29051.9	15802.7	37176.2	69169.9	55769.6	15648	20815.7	18851.2	55154.7	55567.5
1	22	8	70A12	CONTIG3950	1312.48	2347.24	1162.66	228.81	496.042	575.191	974.674	1909.19	1477.8	404.463	385.56	515.159	559.732	468.141	349.454	727.876	1271.02	570.337	1693.39	740.084	2144	2001.28	2167.49	2732.84	405.302	377.698	492.023	118.764	80.5928	81.2998	1019.24	395.049	768.697	884.055	1178.81	795.748	319.713	1201.9	693.766	455.187	449.872	309.699	199.782	125.299
1	23	8	70000000000000	CONTIG4066	6632.3	11127.5	5933.31	580.059	1091.36	1248.97	984.815	1646.3	1077.91	914.475	915.784	1208.14	2030.85	2078.57	1078.77	3400.44	5749.47	2646.58	4574.07	2412.31	5918.05	5736.53	5170.09	7547.38	608.943	681.221	990.077	848.384	622.719	1002.92	3168.89	1147.55	1895.04	2088.52	2415.64	1642.41	217.338	700.044	380.807	607.301	808.089	434.331	390.602	261.381
1	24	8	70I12	CONTIG4183	91.1489	328.326	159.737	197.34	148.813	24.6292	59.1033	103.741	62.7406	222.946	152.431	314.81	95.1802	75.482	98.9652	138.312	149.612	87.6929	91.1377	75.9881	154.053	142.593	132.922	132.374	28.1079	87.9869	138.346	77.6766	145.788	80.9909	66.6487	109.256	34.1122	77.305	31.269	157.747	43.5333	80.4782	108.305	82.8028	64.5631	96.9258	64.1957	387.59
1	25	8	70M12	CONTIG4320	565.932	1387.92	703.548	141.339	327.768	191.13	257.851	492.862	371.14	696.361	700.251	1216.46	120.237	197.275	94.8948	256.478	306.377	198.327	250.095	222.519	448.078	238.695	206.809	296.383	201.782	124.793	139.051	177.504	114.864	155.417	581.462	252.767	417.738	110.95	174.833	192.501	138.937	396.01	262.411	324.693	302.073	236.653	158.655	57.9066
1	26	8	70A24	CONTIG3963	271.184	61.9364	156.8	109.189	212.796	104.894	214.017	187.568	146.637	1021.98	959.205	1182.87	74.0005	93.2977	185.306	149.299	115.609	80.0193	180.194	66.8121	53.726	112.689	51.2989	79.8745	117.804	74.1533	149.209	60.4501	117.205	65.5925	123.122	140.364	82.9132	206.468	18.3084	192.797	146.949	152.907	78.4093	60.7222	79.3384	64.1232	77.7009	267.008
1	27	8	7e+25	CONTIG4081	511.403	1303.52	426.231	85.7995	239.106	261.844	298.293	350.647	223.039	566.906	553.583	915.273	261.721	424.925	151.853	310.339	571.096	275.597	412.593	184.467	609.266	462.634	488.555	647.766	294.678	191.906	348.057	115.222	127.371	156.737	801.918	328.601	459.578	211.92	123.828	123.782	109.781	498.883	329.646	225.297	256.156	222.386	179.219	144.486
1	28	8	70I24	CONTIG4200	532.935	953.092	510.966	348.397	792.61	712.824	812.037	1232.65	780.227	343.896	356.63	594.547	868.293	1431.51	660.835	1289.86	2230.21	939.931	1788.08	823.75	2349.74	2299	2082.96	3104.44	318.599	328.25	226.933	329.505	286.289	372.615	2026.36	983.166	1200.86	631.563	669.136	526.066	258.102	993.479	587.381	266.922	257.219	264.789	463.743	211.936
1	1	9	64000000000000	CONTIG12794	680.479	827.613	550.078	572.841	849.502	832.106	1643.55	1622.43	1118.96	879.568	1147.32	1139.24	4948.54	1470.74	739.091	2716.1	2758.07	1549.16	2232.59	1626.76	3401.8	2313.24	2754.33	3491	1337.34	988.135	753.167	1130.87	1028.4	1387.4	2061.1	1298.7	1027.93	1043.34	794.018	911.752	399.049	1226.58	756.682	494.177	536.074	756.027	385.633	312.775
1	2	9	64I12	CONTIG12920	336.471	434.752	465.544	266.701	325.01	258.982	454.408	840.509	663.432	729.117	657.558	591.655	1333.91	819.94	387.65	1039.5	955.409	475.521	792.007	472.69	693.165	808.039	951.207	949.931	1219.41	750.383	582.164	433.61	490.66	569.129	815.378	534.282	550.326	720.383	536.884	488.487	395.585	1069.12	543.152	435.347	395.587	777.191	282.823	246.728
1	3	9	64M12	CONTIG13047	576.86	662.842	557.587	1659.47	2028.4	2411.23	10710.1	9880.49	8191.74	1225.7	1585.11	1496.88	6629.73	1561.93	880.199	2309.4	2901.05	1452.15	2247.1	1706.51	3140.92	4678.78	5359.14	7266.68	1579.64	1387.46	1667.09	294.976	234.001	364.372	10792.3	4710.13	5170.25	2074.4	2534.94	1778.59	2488.37	5098.67	2472.64	906.194	868.649	649.232	1766.69	1855.51
1	4	9	64A24	CONTIG12679	3030.15	3743.94	2807.87	162.59	173.16	281.545	764.966	988.973	809.913	458.032	594.358	437.997	2063.09	646.025	251.12	2989.39	3608.52	2096.54	2262.92	1007.07	2549.41	3346.97	5303.3	6343.65	1952.69	1584.05	1465.07	310.528	240.537	286.708	1957.05	962.314	954.386	297.581	309.645	304.706	968.806	2038.69	1101.03	685.682	507.454	332.835	179.178	138.759
1	5	9	6.4e+25	CONTIG12810	371.159	435.147	403.443	209.101	262.684	316.884	1000.65	1323.98	1025.8	358.598	475.043	230.59	801.395	380.344	243.74	899.686	1069.72	483.596	1543.93	967.479	2011.65	1717.65	2001.88	2361.03	514.242	507.043	477.162	145.125	168.256	160.049	2939.7	1391.38	1442.35	736.553	1049.93	709.739	613.018	1533.62	952.493	321.768	231.325	241.304	203.992	140.925
1	6	9	64I24	CONTIG12937	1032.01	1320.5	1300.83	146.363	371.744	244.397	1981.84	2198.78	1828.46	492.678	523.467	648.806	3200.78	1131.92	605.321	526.929	769.86	341.999	450.748	320.081	720.375	1059.57	1570.58	1895.66	1324.67	1389.48	1500.94	428.159	350.401	520.251	8485.03	3537.01	4376.04	2829.69	3609.14	2124.14	10146.6	19592.4	13101.5	4490.42	3477.4	2904.17	3090.6	3240.96
1	7	9	64M24	CONTIG13061	649.717	672.411	607.624	249.819	480.63	475.794	700.451	1104.72	746.158	461.474	337.918	338.594	2465.69	1094.18	553.315	675.808	980.292	330.405	1667.35	925.921	2471.15	2680.73	3503.7	4471.84	857.809	987.127	1122.2	238.395	171.147	228.461	5149.34	2227.95	2434.14	1256.04	1447.2	1244.97	3375.1	6401.53	3201.63	2333.09	2004.31	773.483	538.437	385.331
1	8	9	65A12	CONTIG13199	939.561	1477.35	962.543	825.342	1233.08	1395.23	1332.88	2161.44	1523	516.447	534.9	590.431	1850.62	758.724	450.042	1467.34	1965.44	1027.35	1644.82	784.186	2053.91	1167.74	1540.34	2056.04	1657.68	1138.74	1052.77	756.982	779.598	905.271	2796.55	1267.16	1869.51	997.305	1179.33	865.929	501.241	1215.47	897.374	592.934	538.452	847.072	407.949	227.142
1	9	9	65000000000000	CONTIG1355	2520.33	4044.47	3030.85	294.292	438.415	414.063	915.946	985.786	932.562	1087.72	1270.89	1468.37	2601.49	1488.74	554.061	3488.46	4477.16	2432.1	2189.61	1191.25	2670.55	1931.39	2306.37	2687.81	769.339	546.438	493.918	459.402	506.515	586.174	1446.08	644.387	776.249	749.427	1066.03	702.047	194.95	348.088	292.044	297.9	233.762	267.311	244.569	140.274
1	10	9	65I12	CONTIG1477	344.138	493.373	335.614	190.365	207.974	215.036	312.007	377.111	246.921	223.085	244.208	232.928	423.383	245.953	173.61	355.776	420.381	170.991	968.01	645.066	1334.01	1294.5	1399.19	1994.8	379.23	414.409	395.748	335.741	303.366	389.54	1595.19	602.502	865.118	808.036	984.672	657.919	490.126	1007.38	600.806	264.473	230.489	321.198	134.152	137.989
1	11	9	65M12	CONTIG1604	285.545	425.154	406.414	238.126	404.224	300.582	652.418	884.8	665.562	629.408	677.542	719.235	1166.13	840.988	372.267	1299.67	1667.89	744.669	1273.2	1678.73	1443.82	1391.09	1552.34	1971.54	854.631	618.403	448.497	434.111	545.042	443.774	1270.93	587.545	958.642	792.089	832.767	658.505	310.815	784.553	547.42	314.258	287.947	549.92	322.136	201.354
1	12	9	65A24	CONTIG13213	3849.89	5187.31	3974.22	13680	19279.2	23502.4	38947.6	42551.2	34487.8	4160.49	3703.27	5407.29	27412.1	16087.4	6961.3	10865.9	18242.3	8551.86	36342.4	22693	46123.1	32031.6	32672.7	46214.9	12454.1	12722.2	17042.1	7238.87	5883.84	9112.04	46848.1	27353.1	37533.2	20083.9	29442	18697.3	18514.6	46511.6	26907.2	29989	31319.3	15770.7	27539.9	27915.9
1	13	9	6.5e+25	CONTIG1369	1086.22	1454.16	1119.11	3005.21	4558.13	5264.81	11311.2	11167.2	9533.48	715.865	656.619	1010.52	275.761	358.339	207.817	404.219	350.187	216.602	1236.71	840.173	1718.03	2921.04	2733.8	3529.38	1161.45	965.298	1149.66	1190.28	1047.97	1290.71	13082	5012.75	7979.37	5933.16	8822.52	4905.44	1955.73	5182.43	2697.9	7479.45	7202.1	3520.38	734.883	408.113
1	14	9	65I24	CONTIG1492	397.233	643.735	440.039	350.875	826.086	632.501	1866.3	2223.04	1529.31	1233.39	1694.77	2030.26	2691	1905.2	849.655	2480.56	4135.9	1925.62	3662.1	2387.79	5028.11	3501.82	3803.95	4877.37	1634.3	1588.73	1876.38	477.717	508.827	753.804	4224.78	1534.76	2446.02	1212.23	1282.22	902.547	441.439	1380.73	829.219	529.333	639.965	426.364	706.454	538.587
1	15	9	65M24	CONTIG1620	2634.56	4379.85	2927.99	1433.34	2432.98	2715.02	2654.52	2894.83	2148.13	374.448	301.016	375.977	3970.65	2720.05	1058.45	2712.1	3489.44	2029.14	4452.67	2521.87	6030.28	4124.6	4682.48	6329.83	629.039	525.502	753.072	695.436	490.144	705.332	5525.13	2266.51	2974.72	1881.25	2716.18	1745.48	416.603	1168.9	877.882	923.749	910.237	670.726	2479	2285.96
1	16	9	66A12	CONTIG1754	9651.22	12391.5	10558.6	34892.2	40058.7	62556.7	38447.6	51765.4	46712.1	10532.4	9430.3	15421.4	60990	55811.7	41444.8	83736.5	74944.7	58175	52213.7	32716	52139	37699.5	43038.1	50940.5	37305.8	38789.3	40936.8	3033.05	2394.96	3266.64	40201.1	15693.6	26674.5	4683.7	7366.74	4539.46	35828.8	74491.5	41926.3	19624.2	24719	19418.4	8298.87	8727.1
1	17	9	66000000000000	CONTIG1901	1155.53	1603.12	1292.9	1160.7	1931.17	2413.14	2314.88	3794.91	3029.24	1655.97	1768.92	2069.81	2750.85	2284.18	1309.62	2599.77	3016.8	1554.92	4367.3	1894.35	5437.52	4126.02	4371.91	6139.25	3017.7	2135.75	2494.51	1857.69	2169.39	2555.69	8380.45	3532.67	5254.56	1779.57	1860.72	1570.46	1227.88	4356.95	2923.43	2246.18	2160.35	2830.35	1211.04	891.779
1	18	9	66I12	CONTIG2062	49587.3	60528.3	46949.6	2469.5	4338.69	5323.29	7132.71	14142.4	11045.9	5770.04	5613.21	7755.69	13427.2	9570.21	4262.02	5843.81	10729.5	6469.04	9759.58	6033.09	12179.9	13649.2	13679.3	17031.7	6921.91	6404.8	6399.02	5716.56	4617.53	7084.55	12979.6	7883.18	7845.32	2269.45	3531.02	2531.69	3438.07	6186.81	3886.99	3221.64	4570.16	3307.62	4526.15	5010.55
1	19	9	66M12	CONTIG2213	2812.16	5187.66	2891.2	8108.39	13337.1	21083.9	18412.1	31516	24627.1	1905.88	1680.31	2718.45	11710.6	9969.69	4436.35	7098.84	11048.9	5704.81	16380	7111.51	20231	15751.1	16511.6	23699.5	13306.2	12680.9	17648.9	3003.97	2227.21	3229.33	32146.3	12656.5	23242.5	2240.17	2829.13	2084.36	5753.83	19774.3	10725.8	3598.86	4082.89	2992.83	16469.8	19487.1
1	20	9	66A24	CONTIG1771	4404.14	6801.24	4023.88	3196.96	5602.22	5839.62	6709.58	9293.51	6867.66	3590.95	3152.43	5919.15	5454.87	3918.88	2292.79	3497.42	5481.68	2829.38	15111.1	8405.08	17453.8	24487.3	22050.4	26303.7	19942.1	18214.5	30491.6	24773.8	17222.8	24316.4	48917.7	31132.5	63304.8	44612.6	56027.7	33872.2	47470.2	78038.1	74335.7	56494.9	58292.8	61060.4	13287.5	15946
1	21	9	95A12	mCA038412	593.136	468.097	775.065	193.763	492.346	500.8	437.108	513.771	336.544	1025.03	1217.24	1294.97	503.066	567.147	349.272	872.563	993.797	478.676	1129.21	253.769	1300.79	461.23	609.698	628.551	1145.7	1060.43	772.187	736.189	1249.83	1241.31	645.815	534.625	805.364	551.068	315.03	446.907	387.487	1217.93	803.442	1068.34	885.769	749.774	668.836	536.055
1	22	9	6.6e+25	CONTIG1917	8121.57	15248.6	7705.3	17175	28650.4	42018.3	29135.1	42666.6	34717.3	13569.1	11825.8	18661.5	28067.8	27981.8	15023.1	21025.8	31422.4	19282.1	37965.5	18251.5	41027.8	37534.4	35834.4	47959.6	33569.7	33446.6	40633.1	24386.4	19791.7	25826.6	48703.6	32126.5	60765	21357	26211.3	15665.2	28489.3	63842.2	46611.2	21718.8	26603.2	25726.3	39683.3	44984.1
1	23	9	66I24	CONTIG2076	3954.29	7817.47	4084.57	1912.56	3245.93	5204.8	6899.5	13509.3	9364.35	4270.12	4175.14	6171.45	5987.19	6490.17	3006.03	6868.8	10819.4	5881.91	15784.7	6069.01	18886.7	18427.2	17692.7	25590.7	14962.2	14646.6	18306.5	10384.1	7045.31	10934.4	44771.9	24932.1	45263.2	24082.8	31576.8	19997.5	14492	45595.8	28453.5	23334.4	27077	18219.8	9316.32	10469.8
1	24	9	66M24	CONTIG2226	3465.24	6031.08	4353.56	5004.86	8564.53	13287	10633.7	17448.5	12807	3795.78	4838.86	5878.95	14621.1	17334.6	7786.25	15437.3	20736.8	12816.4	22129.5	10337	25335.5	25554.2	22745.5	32488	14930.1	13910	18176.8	4774.41	4265.52	5576.76	42796.2	19454.2	33822.9	5410.8	6380.08	4824.25	11336.8	38062	23586.3	7077.72	6896.72	9108.83	11552.7	12179.2
1	25	9	67A12	CONTIG2373	7158.99	12556.7	6828.51	18449.6	34256.1	46434.2	23181.7	36311.1	26306.3	7848.43	6697.38	9700.28	34198.6	40950.1	25438	28679.2	45364.6	25591.1	52906.2	30224.7	47224.2	41006.7	44669.9	51971.3	50007	52638.6	57688	11503.6	6634.84	11295	48378.5	34962.3	52280.3	12526.9	13543.5	8547.61	29421	68351.2	47008.6	13367	18536.5	11954.9	34208.2	38660.9
1	26	9	67000000000000	CONTIG2517	18496.2	34085.6	18907.4	1772.68	3913.39	6500	7712.95	11932.5	8008.16	3784.67	3946.76	4806.46	5571.86	5694.03	2713.42	4669.36	7575.77	5219.57	4661.34	2182.69	4207.81	7457.7	5577.39	7489.16	4902.65	5076.02	4698.71	2503.35	1811.36	2656.54	12858.1	5938.7	8320.42	3294.13	4326.36	3569.59	3644.58	10632	5970.43	1237.15	1523.46	1129.23	14594.6	19572.4
1	27	9	67I12	CONTIG2676	2116.78	4358.75	1935.62	3565.83	8071.39	9758.7	6611.46	10252.2	6067.87	1593.27	1431.54	2215.84	16213.7	18855.3	11758.8	11176.3	19098.3	9334.21	12766.9	6486.76	15123.9	17462.2	13723.9	18958	8078.03	9450.35	13159.4	3191.33	2211.18	3141.76	27330.9	9512.32	19177.8	4047.92	4533.25	2882.85	9344.61	30069.5	14301.9	3620.21	4708.6	5942.75	7333.61	8869.22
1	28	9	67M12	CONTIG2825	119.503	116.339	338.304	32.6147	194.981	66.4802	265.361	8.77071	101.561	257.561	202.403	461.512	73.3797	27.9004	151.44	36.2946	53.4509	29.5107	137.456	28.4162	45.2703	21.2881	177.324	71.8863	96.1178	100.716	60.4167	241.056	134.331	242.125	56.1811	36.2513	252.397	46.3556	5.29972	67.9262	236.345	72.2256	107.584	159.182	53.6524	160.209	258.33	656.385
1	1	10	60I24	CONTIG10885	4123.53	6403.72	5142.68	9405.74	10805.8	19140.2	22237.1	23862.5	17642.3	3244.59	2728.67	2388.1	41515	16817.2	7641.4	30136.6	29069.6	20316.3	28078.5	21127.5	41216.7	20987.1	26327.3	33820.2	15691.8	11838.4	12588.2	5608.51	4491.17	6113.77	40339.5	25214.2	24269.9	27874.2	38768.9	24709.3	10416.8	19150.5	12699.5	21513.7	15272.9	5669.06	6386.98	6500.39
1	2	10	emp	emp	85.2996	88.1963	34.2874	119.458	225.113	196.892	26.8927	113.67	49.1134	201.523	253.215	53.0138	10.86	70.4419	21.2812	107.501	58.6119	47.01	40.0684	17.9806	38.5655	66.9286	42.8284	81.1447	147.511	23.2715	22.396	89.7914	409.802	48.5249	70.3952	22.7545	20.2082	113.622	25.2847	86.1269	124.987	28.3704	22.6826	18.8096	106.205	144.846	71.05	563.625
1	3	10	60M24	CONTIG10988	2712.17	3610.63	3973.16	410.903	660.595	737.946	785.908	1167.82	972.498	1879.35	2198.89	1882.74	1371.73	693.149	542.125	1818.5	1468.25	1040.31	1173.45	562.891	1717.68	656.304	825.746	1061.34	2450.03	1311.03	833.898	878.607	1281.12	1355.03	1017.51	698.191	1195.8	833.376	802.533	859.661	441.275	1692.89	1184.08	1036.77	789.584	1509.78	608.96	356.357
1	4	10	61A12	CONTIG11060	955.28	1201.94	1186.06	997.599	1103.69	1974.09	1703.61	2416.27	1979.66	879.718	1193.04	1106.99	3791.01	1413.67	684.546	1917.7	2058.55	1330.86	2091.82	1408.93	4180.69	2724.56	3538.52	4349.31	3963.6	1716.94	1524.89	783.037	1421.3	939.738	5742.78	2787.6	4283.7	3493.41	4303.69	2986.96	3227.94	5880.18	3616.83	2895.58	2221.87	1677.41	1007.9	882.543
1	5	10	61000000000000	CONTIG11172	67690.8	69014.9	67417.1	2741.03	3377.23	5507.98	9432.83	12782.9	9797.92	4181.15	4829.2	4422.46	26494.3	11911.5	5568.07	12621.6	16838	21124.8	12474.1	12270.2	16748.8	13952.1	15037.7	19926.3	5304.77	6146.87	4686.37	2783.88	2087.99	2849.21	14676.8	8318.61	9835.15	7333.62	13911.5	8692.69	3417.92	4585.66	3448.21	3585.31	2811.49	1880.15	2258.36	3007.18
1	6	10	61I12	CONTIG11339	25488.2	37411.4	29842.8	65312.3	76455.5	85785.8	74805.1	76947.6	76057.9	35791.3	33881.4	41949.5	14445.4	5390.91	2789.35	3274.52	4552.62	2233.65	4763.41	4225.12	6960.01	12520.4	13582.5	16849.2	15140.7	14008	14821.2	1921.82	1873.23	2155.25	29175.9	11912.7	16732.6	21599.8	31695.5	20070.4	31919.3	56942.7	30057.7	31920.5	24974.5	9935.81	3001.94	3526.5
1	7	10	61M12	CONTIG11471	13188.9	19530.3	15737.5	27893.9	35845	50041	62157.7	61026.8	59577.3	28613.5	26305.9	33842.8	50095.4	44661.8	39020.7	71012.5	68822.5	48517.3	72848.2	64979.1	55274.2	50907.6	65738.9	65435.7	65634.2	57674.7	64292.5	49320.8	56204.1	54674.6	59427.4	48505.3	67001.9	76277.5	74246.1	65987.5	65663	72992.4	81362.7	66078.7	70342.2	60236.2	76718.3	58696.6
1	8	10	61A24	CONTIG11073	13563	17535.5	15207.5	749.834	865.729	1192.75	2679.77	3371.55	2747.89	1150.71	1179.76	1269.24	4936.91	1893.1	764.548	2045.64	2937.08	1652.24	2321.75	1230.93	3137.75	2930.1	3580.58	4107.77	1865.87	1539.53	1164.97	910.31	890.957	1005.32	4551.71	2420.98	2029.29	1114.01	1957.95	1355.21	363.731	619.712	334.763	783.071	705.983	622.286	366.195	206.76
1	9	10	6.1e+25	CONTIG11188	1247.81	1369.99	1238.48	1169.23	1622.5	1994.33	4019.38	4636.74	3556.82	1211.97	1293.38	1484.45	5091.14	2682.52	1128.24	2708.8	4160.99	2080.1	3797.21	2242.55	5538.83	4264.98	4435.63	5916.48	1778.73	1575.54	1559.67	593.765	772.115	765.855	9772.17	3665.69	5622.24	2919.4	3665.68	2400.4	2877.95	7143.25	3948.11	2632.63	2212.45	1319.13	1288.39	1086.36
1	10	10	61I24	CONTIG11353	894.859	1563.16	1127.08	184.189	339.589	349.918	523.296	518.998	526.381	935.93	1472.35	1304.88	649.144	328.343	231.704	722.677	716.711	362.795	641.179	530.009	841.27	712.027	816.008	1057.05	710.731	400.192	418.175	248.367	434.526	313.843	1096.3	547.127	845.453	1391.35	1562.01	1225.17	331.755	722.853	807.739	387.506	327.56	451.543	269.061	146.775
1	11	10	61M24	CONTIG11483	174.511	148.214	88.5617	135.068	187.98	90.9703	18.6878	110.763	157.208	1003.12	834.186	808.548	117.159	141.119	235.139	300.882	123.272	97.5774	263.374	3920.09	150.602	74.0443	100.457	166.389	156.155	100.215	122.508	253.485	231.074	182.683	99.4766	110.332	65.6683	93.6926	40.1486	243.468	51.4439	389.61	141.462	79.1104	119.28	303.778	139.167	232.635
1	12	10	62A12	CONTIG11589	3132.69	4219.71	3255.84	1928.35	2580.26	3073.97	6774.32	7847.46	6022.1	650.141	758.204	702.559	8656.49	5257.68	1953.54	5018.8	8202.55	3620.93	4716.49	2879.84	5962.1	6759.73	7319.85	9780.24	1706.52	1679.19	2072.59	605.202	576.282	755.257	14240.3	6640.35	8898.51	2152.98	2843.33	2167.47	2273.72	6308.6	3341.19	1948.13	1613.08	952.994	3932.23	3424.63
1	13	10	62000000000000	CONTIG11736	6118.41	9081.92	6523.51	19703.7	21718.3	36303.9	45796	45204.9	48946.3	4428.55	3765.82	5134.23	52045.5	53869.3	33639.9	46275.3	59856.5	39333.8	40062.4	20756.9	47401.9	36702.7	41754.4	51464.7	29046.7	26918.1	34019	3077.46	2256.65	3648.42	55070	31438.7	40290.9	9518.38	15492.3	10756	31955.1	64384.6	41543.4	24019.5	21371.8	16424.6	14279.7	14289.6
1	14	10	62I12	CONTIG11856	163.123	259.999	109.018	238.066	350.016	189.658	904.344	1154.85	747.905	202.651	296.603	230.406	265.912	223.843	144.684	1333.04	3678.12	1308.5	2761.54	1435.81	4305.92	3513.06	4138.49	5725.64	851.723	1187.36	1696.41	407.898	410.901	451.889	6533.43	2495.01	3421.47	1793.7	2320.95	2187	2934.01	7567.79	3556.38	4061.61	3411.44	1717.64	954.404	758.549
1	15	10	62M12	CONTIG11975	1143	1723.94	1265.27	1845.11	3071.32	3560.46	4078.34	4982.76	3749.35	1003.38	1018.47	1217.97	6114.7	4982.39	1995.03	5287.68	8093.22	3869.01	8842.49	5261.89	10987.3	7429.67	7670.29	10894.1	6624.62	6566.06	10191.3	1047.3	820.791	1355.78	10528.9	4371.91	5449.52	4039.42	5699.78	3865.03	2526.63	7636.04	4347.6	4128.17	3701.42	1726.9	3551.43	3146.27
1	16	10	62A24	CONTIG11602	1014.92	1314.09	1148.26	1099.28	2065.03	1993.47	3992.13	5659.05	3965.14	1216.29	1213.76	1596.84	8180.53	5879.63	2848.03	3729.91	6145.55	2871.8	5659.39	3059.66	7465.94	7297.47	7795.25	9888.53	3283.35	3453.37	4521.28	511.48	557.935	568.577	16959.6	6434.13	11160.5	2930.88	3754.91	2490.03	4592.15	11543.3	6617.46	2480.66	2492.1	1067.87	1205.7	979.858
1	17	10	6.2e+25	CONTIG11751	281.363	491.177	288.009	126.403	309.132	258.587	258.533	302.887	302.709	185.824	265.986	204.33	744.901	505.552	355.953	369.032	409.789	236.453	403.102	285.664	553.436	603.745	780.118	866.067	185.878	206.056	145.951	88.3481	102.105	105.123	827.42	286.683	435.48	339.942	338.012	415.576	181.49	334.807	352.014	169.911	169.15	163.181	143.488	70.4436
1	18	10	62I24	CONTIG11871	4308.92	6176.23	4147.37	3250.16	5231.38	6367.08	5107.72	7337.79	6118.79	3146.1	3626.01	5003.35	12034.1	11172	4977.76	7701.81	11480.4	6006.78	12330.3	6902.35	15217.6	15104.8	15131.7	19378.3	9451.56	7962.65	11307.7	4478.37	3974.77	5314.5	25023.2	9777.23	14457.9	7006.8	10431.8	7088.91	3427.4	10507.6	5692.15	4590.63	5307.22	5509.67	6754.06	6330.64
1	19	10	62M24	CONTIG11992	827.869	1333.4	833.633	614.12	1022.05	1257.75	1721.64	2688.77	2031.62	1094.8	1593.18	1912.73	1508.86	1448.74	695.361	1779.06	2470.42	1277.06	2037.36	1123.07	2619.9	2575.18	2685.51	3507.35	1518.09	1290.06	1472.1	433.656	533.645	568.823	4491.9	1899.53	2891.29	856.167	980.082	745.978	739.203	2371.13	1330.39	609.705	655.916	675.385	617.58	403.292
1	20	10	63A12	CONTIG12143	19160.2	27948.9	19607.8	35795.6	48825.8	66740	24877.4	34859.2	27024.7	5042.88	4317.96	5654.96	46433.4	46979.1	42876.7	76076.5	64701.2	54065.6	66498.5	49668.5	52862.7	50572	52228.9	58862.2	57282.1	51637.9	68580.4	16670.6	12654.2	16915.7	54263.6	31100.7	62726.7	37295	57039.1	38817.7	43274.5	67246.5	62351.2	49519.8	56801.9	28440	13071.5	15935.3
1	21	10	63000000000000	CONTIG12294	245.441	458.677	266.011	102.803	142.46	144.817	150.163	292.055	274.064	341.03	486.127	612.014	164.708	205.041	120.839	330.309	430.273	266.206	260.503	168.436	311.573	330.216	315.286	401.888	173.295	186.984	187.382	105.932	133.051	178.005	592.642	163.672	245.518	248.92	151.256	102.182	129.33	208.237	146.996	103.647	104.524	158.934	112.444	73.9002
1	22	10	63I12	CONTIG12425	1449.48	2083.69	1376.3	2947.91	5042.38	4943.6	6663.59	10170.8	7836.53	1287.88	1452.07	1954.24	7450.23	8556.58	3794.42	3980.74	6928.02	2970.27	6948.93	3933.73	8417.42	13397.4	11451	14179.5	4629.19	5441.4	8796.99	1310.13	1178.58	1390.4	36113.7	15808.8	25109.3	9977.35	14286.9	8224.91	19125	54243.1	25997.6	5140.09	6638.13	8092.23	29067.1	33610.8
1	23	10	63M12	CONTIG12559	1440.29	3319.83	2131.63	906.12	1092.28	1598.46	1586.49	2859.97	2211.09	1185.46	1214.3	1435.72	1894.33	2288.58	1046.49	2567.09	2611.75	1602.59	4161.79	1551.06	4760.95	3667.07	3860.29	5325.42	2770.5	2058.87	2273.87	663.666	1363.55	1146.47	3797.94	2117.37	2999.04	1078.39	1076.88	1000.43	730.871	2805.07	2255.3	1104.37	980.401	2374.91	1115.79	859.589
1	24	10	63A24	CONTIG12170	800.908	1483.63	895.187	135.742	255.097	260.928	604.539	908.606	553.173	668.256	616.191	859.651	15378.6	18370.9	9824.57	10165	17682.6	8956.11	6467.06	4106.03	8585.78	39159.9	31735.6	40868.3	43876.4	46588.4	52143.6	25267.7	19558.9	25942.5	49502	41618	62558.7	9785.52	11922.5	6813.73	64007.8	69616.8	75921.6	21740.7	31509.6	41894.6	63395.2	58857.5
1	25	10	6.3e+25	CONTIG12311	6121.2	11833.1	6457.58	29792.5	48607.2	61872.7	58649	56123.3	48485.4	20362	16415.2	25895.7	32721.9	38407.6	21518.3	39127.4	52082.8	34890.5	58873.6	43367.6	55448.5	49206.3	49309.6	55125.5	65771.4	56632.8	65995.3	38589.3	25244.4	39143.6	56940.3	39392.9	65679.5	16511.3	20416.5	12753.8	53078.8	71929.9	71991.4	27449.2	40007.5	36702.1	68444.1	60544.7
1	26	10	63I24	CONTIG12447	1186.21	2371.9	1829.62	249.235	526.193	680.578	390.485	611.225	372.297	520.495	760.114	737.904	703.754	814.19	494.657	1253.26	1563.94	1050.1	2200.49	926.763	2392.56	2234.78	2492.24	3220.5	2714.89	2502.44	2479.19	342.582	347.858	380.868	1025.88	377.729	645.19	298.112	192.74	243.122	296.896	722.52	535.457	201.986	194.62	287.47	162.308	91.7337
1	27	10	63M24	CONTIG12576	864.718	2070.72	1008.23	2226.64	4695.23	6475.44	4754.05	7054.29	4623.52	1029.6	965.565	1109.59	1950.68	3004.08	1413.66	6005.61	10442.9	5032.55	10237.2	5017.29	12609.8	11090.8	11433.4	14448.4	4124.7	4349.33	6570.62	1813.51	1349.33	1799.68	9876.85	4334.05	6116.8	614.742	611.476	455.935	1207.86	5288.25	2683.94	1139.95	1041.27	847.238	2261.41	2325.68
1	28	10	64A12	CONTIG12664	934.852	1403.22	848.52	2732.96	5729.7	5935.26	6331.19	8052.22	5241.54	1031.01	862.518	1297.71	11370.5	16039.8	8008	8666.67	14766	6357.45	22243.3	13463.6	26409.4	25375	19803	27664.2	1966.6	2858.2	4698.6	1386.03	842.1	1364.32	26021.8	10599.3	14184.2	16708.7	21591.7	14544.6	9961.28	33473.1	16193.9	26177.5	25201.6	10879.8	15767.7	16307.4
1	1	11	57A24	CF492007	333.757	273.563	225.662	203.545	214.28	226.441	240.256	443.903	292.99	1287.02	1460.83	914.417	446.243	179.174	232.649	531.133	247.942	266.445	304.7	154.631	371.941	197.291	366.939	206.241	598.332	415.047	303.301	346.506	551.828	441.849	302.861	395.613	434.832	302.34	294.686	284.172	201.064	988.028	315.881	395.463	226.014	729.165	146.425	307.519
1	2	11	5.7e+25	CF496284	43091.7	49127.1	56331	1116.91	1182.97	2270.01	4247.39	4486.23	3872.37	2801.4	3149.63	2677.73	10468.3	4567.54	2760.68	7317.46	7880	8910.32	5432.84	4905.69	7048.02	6832.66	6686.48	7972.98	2812.34	2581.06	1883.17	2143.17	1717.61	1962.71	7097.8	3999.24	4218.72	3735.64	6707.38	4093.12	1809.65	1608.6	949.028	1636.4	1317.85	939.692	1166.84	1236.83
1	3	11	57I24	CF497279	89055	76120.5	78776.4	7895.4	7534.84	12777.9	23760.2	35681.3	23842.1	13125.9	16158.5	14772.6	55362.2	24348.3	15668.1	56160.3	59980.6	64352.5	37007.1	33396.6	51900	41188.2	44050.6	55201.4	22467.7	19783.8	13334.2	12416.6	10478	14443.7	47264.8	21670.6	32316.7	15019.6	27727.9	17376.4	13835.3	17662.4	7277.4	10650.7	8842.49	6801.24	7830.66	9553.3
1	4	11	57M24	CF498503	1888.96	2275.65	1998.01	415.476	515.925	441.467	334.771	368.018	400.139	173.014	149.634	131.345	589.426	262.712	101.895	1431.08	1585.78	894.8	679.39	476.889	1068.85	1154.88	1381.17	1479.69	412.544	270.977	378.625	124.8	133.906	134.896	424.919	186.492	235.534	411.549	575.104	438.644	178.481	316.774	240.681	141.392	112.997	107.627	173.578	220.233
1	5	11	58A12	CF499953	12178.6	12236.5	15342.3	157.998	265.866	349.358	722.408	945.447	921.603	2608.05	3523.76	3104.21	1367.13	607.19	335.065	1384.24	1425.03	977.479	987.565	610.633	1485.48	736.81	963.14	1197.58	993.97	585.59	318.904	369.892	434.713	503.236	741.629	322.893	505.539	414.299	465.242	427.344	267.222	558.676	259.673	358.223	328.328	476.482	228.18	127.04
1	6	11	96M24	SPOTTINGBUFFER_M_24	13.5129	67.3403	160.393	342.743	112.122	19.6272	71.4735	17.1731	106.469	73.7423	209.144	14.4669	49.9512	41.522	110.194	51.7154	117.768	16.9726	54.1883	69.1147	108.468	37.2602	22.8154	14.7121	34.2694	37.6999	100.015	57.3661	95.9547	197.119	91.0146	114.512	56.0562	124.409	7.20784	40.8399	102.648	108.533	104.394	80.4688	13.3866	95.0838	190.372	809.028
1	7	11	58000000000000	CF501352	1297.09	1867.83	1550.96	640.44	897.309	908.342	1221.04	2156.13	1799.62	1030	973.461	888.945	1430.7	1313.25	872.978	2088.71	1995.86	1202.11	2139.97	1035.46	1956.31	1739.41	2285.12	2761.56	2366.84	1434.12	1071.74	1062.49	1120.39	1279.76	2544.17	1518.91	2622.54	1111.98	1089.22	886.061	860.627	2187.71	2102.24	1074.12	972.775	2332.35	863.614	714.289
1	8	11	58I12	CF502511	39253	49970.3	44216.9	429.02	492.783	697.518	1560.76	2295.27	1919.17	908.418	1072.24	1200.65	4917.31	1761.73	593.174	1958.07	2878.39	1656.13	1349.13	786.174	2119.92	1810.14	2293.37	2596.69	1150.17	934.133	824.619	645.597	457.192	744.815	2801.15	1096.85	1160.25	504.063	896.683	702.973	351.128	555.342	333.107	478.913	424.408	267.205	338.354	214.348
1	9	11	58M12	CONTIG10041	3411.9	4268.84	4246.15	2727.77	3116.15	5249.87	12758.5	16116.9	13885.2	3250.07	3070.2	2737.74	8981.28	5130.42	2251.31	5821.89	6097.52	3808.59	13107.6	6633.55	17252.6	12776.7	15995.5	22578	15040.6	11247.4	11224.4	3071.45	4052.65	3805.36	41655	18987.6	28749.4	5586.92	7029.81	5587.05	22954.4	49496.9	29936	10237.8	9959.05	10441.5	6356.97	6874.52
1	10	11	58A24	CF500141	1350.43	2222.44	1740.32	227.282	284.06	262.193	377.883	639.476	662.356	905.839	1057.67	995.359	784.484	420.127	320.604	674.542	648.208	482.824	599.752	696.008	790.238	484.131	680.619	746.79	860.408	529.103	333.821	351.569	404.126	377.558	836.926	501.886	747.064	450.33	567.728	514.165	225.788	640.792	460.867	314.098	385.14	600.93	255.326	201.483
1	11	11	5.8e+25	CF501470	934.678	1343.73	973.476	119.34	126.444	182.023	172.006	228.286	160.233	118.261	120.393	165.758	185.485	223.543	111.207	321.399	277.887	181.669	254.305	965.604	352.494	184.853	245.501	283.009	383.081	207.872	189.077	126.289	226.014	216.757	171.51	145.432	187.657	272.143	125.203	255.58	106.856	274.332	129.389	168.418	116.786	194.337	165.767	95.6626
1	12	11	58I24	CF502705	36868.2	44632.1	54037.2	9924.81	9768.37	17291.6	31320.2	31295.9	31096.9	15309.5	26500.2	23437.9	29747.4	18835.9	8869.47	17522.2	26358.7	19388.5	21793.7	19304.1	24339.1	28115.5	21883.3	28625.6	13518.3	10796.2	11277.2	7710.94	8220.35	10806.2	26616.6	11641.2	27523.7	8316.45	16036.8	8716.14	7892.65	11031.9	9067.82	5525.23	7295.32	6492.71	9223.43	10207.4
1	13	11	58M24	CONTIG10056	566.873	597.729	612.343	124.308	201.183	141.939	297.823	338.354	409.888	230.324	189.356	258.906	276.726	298.133	191.451	475.956	423.964	189.006	244.597	172.378	327.347	218.374	267.565	280.742	291.802	271.628	177.953	132.887	234.555	130.683	430.825	259.866	302.141	208.746	254.284	143.832	157.632	341.361	256.963	118.753	143.412	271.416	135.207	45.1929
1	14	11	59A12	CONTIG10129	561.672	955.191	677.042	293.388	347.683	445.862	520.128	893.184	568.958	376.095	373.284	456.473	782.899	671.601	411.925	1025.79	814.276	563.336	781.909	499.038	950.526	575.147	724.768	934.585	693.705	513.651	374.414	164.257	258.047	227.905	759.843	256.416	609.107	742.427	953.344	683.404	179.549	377.995	481.566	141.952	150.091	339.503	234.878	101.606
1	15	11	59000000000000	CONTIG10247	1353.7	1833.95	1302.95	1035.65	1371.43	1399.65	3754.69	3907.09	2658.41	959.278	863.57	1634.12	5507.01	2659.32	1541.01	2184.46	3226.71	1297.59	2666.17	1680.45	3613.82	4149.55	3869.36	5240.07	1248.54	1640.52	2354.34	3710.01	2801.51	3907.69	14826.6	5377.61	9228.24	1522.69	1880.37	1145.41	3012.32	5324.04	2779.25	1910.14	2058.92	2233.92	1522.31	1905.92
1	16	11	59I12	CONTIG10367	1453.34	2270.16	1588.91	3452.02	4960.8	6382.19	9770.05	13302.6	9375.7	2069.05	2840.74	3066.95	23788.9	14863.5	8755.78	21913.5	30232.3	16574.5	11009.7	7090.75	13341.4	15974.2	15525.9	20454.5	4704.49	3952.11	4572.08	1759.68	1817.14	2388.9	29456.9	11468.7	19338.4	6071.7	8538.39	5031.63	10848.4	23368.7	14668.4	6452.22	8246.55	5624.26	2726.1	2621.66
1	17	11	59M12	CONTIG1048	2094.4	2703.59	2133.01	2038.07	2901.9	3830.2	4716.17	6887.14	4300.83	3808.64	4389.37	5885.14	6661.98	6636.43	2914.04	6081.87	9183.05	5463.73	5683.77	2963.58	6820.14	8120.01	8320.85	9897.97	9661.6	8857.26	10776	6447.2	7174.98	7528.82	28770.5	13009.5	25888.4	34612.4	45009.5	31721.2	17647.1	36796	18081.7	16166.8	18499	23643.1	9622.43	9548.39
1	18	11	59A24	CONTIG10140	1110.29	1209.86	1160.34	2040.71	3222.74	3643.24	6175.23	8953.67	6990.52	1376.48	1374.93	2023.74	8476.76	6388.94	2891.64	3535.95	5443.02	2659.71	4782.97	3209.9	6712.39	6738.59	6620.32	8794.97	2509.57	2106.89	3066.65	1194.66	1012.47	1438.31	15673.2	6495.91	9962.29	2815.31	3968.44	2499.66	5007.53	14538.7	8426.11	2677.4	3034.5	2636.06	5385.07	4947.55
1	19	11	96A24	SPOTTINGBUFFER_A_24	127.617	24.293	190.968	40.1432	215.375	54.5595	111.487	48.4453	59.4706	78.3505	269.19	131.096	132.772	38.2606	141.794	91.3579	32.0584	15.4763	78.8172	75.6051	58.4518	21.9466	19.5637	52.1084	37.3958	85.37	86.0053	177.078	225.245	91.2116	44.4141	100.38	33.5346	43.5018	62.9607	55.1195	167.292	69.6983	96.1372	61.0478	78.8737	86.5758	344.476	205.692
1	20	11	5.9e+25	CONTIG10266	1071.02	1625.76	1126.95	478.64	565.252	875.197	305.076	1238.71	575.895	1976.45	2742.44	2613.83	353.137	868.995	687.235	1782.87	1406.92	1015.74	1611.11	665.976	924.729	724.468	774.234	831.46	2495.71	1259.4	969.742	511.03	1199.53	750.285	715.897	513.24	1283.07	725.027	729.273	789.434	416.728	981.822	1042.34	869.933	683.869	1658.46	403.457	142.416
1	21	11	59I24	CONTIG10381	1875.99	3474.7	2374.44	1763.92	2412.46	3641.87	2388.16	5059.17	3677.22	1119.74	1626.3	1804.45	8199.29	8520.48	4064.23	5350.63	6808.82	4442.04	5028.2	1795.48	4328.27	5753.92	5712.19	6908.49	3333.55	2256.84	2035.84	885.049	1380.77	1163.43	3256.2	2053.79	4027.85	1466.23	1806.1	1271.77	1194.53	3015.37	3314.34	1448.05	1330.4	2664.04	1540.17	1149.97
1	22	11	59M24	CONTIG10491	1118.16	2031.49	1091.27	319.886	408.509	388.516	426.761	759.045	555.009	2101.52	2793.83	3889.19	364.513	459.377	284.14	1275.71	1052.56	765.886	973.142	467.752	1108.82	825.871	980.866	1315.67	1072.35	815.266	537.161	210.616	521.007	473.736	738.024	354.253	556.871	281.394	259.32	257.4	204.441	420	664.764	502.236	356.787	354.868	204.485	94.5119
1	23	11	60A12	CONTIG10620	830.184	1830.35	882.498	305.314	317.762	505.96	678.918	1127.99	864.703	747.419	865.128	997.702	688.568	879.383	319.228	769.173	939.398	523.978	1263.97	726.723	1526.74	1437.21	1475.17	2011.75	398.198	329.095	339.454	149.707	224.599	238.386	2034.76	871.088	1023.8	1377.23	1752.86	1298.1	248.458	506.619	272.219	310.103	345.341	425.557	205.675	108.588
1	24	11	60000000000000	CONTIG10741	3596.3	6167.36	4051.84	4981.41	7503.74	11209.2	6558.48	9729.91	6676.68	710.897	624.32	677.954	7126.21	8080.63	3776.78	11424.4	15233.2	8573.63	11448.6	5676.66	13301	12595.3	11955.2	16518.5	4972.16	4787.87	6865.35	1606.91	1194.21	1649.75	22171.5	8154.41	13770.3	8899.88	10884.4	7300.81	3900.62	12714.2	7460.88	2909.63	3528.57	2827.95	3363.42	4255.77
1	25	11	60I12	CONTIG10874	4565.86	9270.33	5107.58	685.284	634.827	786.84	719.336	1948.73	1082.52	2020.37	2861.86	2965.12	833.468	1330.83	741.022	2691.82	2315.8	1611.82	2409.57	805.664	1872.93	1407.52	1781.79	1786.92	2446.8	1220.54	734.725	746.911	1432.28	1118.62	1502.3	774.987	1347.98	1035.57	1066.94	966.853	404.675	990.364	1335.2	880.846	764.898	2008.48	545.516	235.921
1	26	11	60M12	CONTIG10976	76885.1	87864.5	80130	6371.91	8720.61	11744.4	14781.9	26663.1	16679.9	8504.24	9353.48	11254.7	26889.6	33903.4	18289.4	22849.4	32269.8	36358.7	24901.5	13576	26660.9	36854.4	25504.2	33965.9	8483.39	9527.33	10016.9	7007.99	3808.11	6750.13	33408.6	16728.9	21587.1	10589.1	19253.9	12800.7	3432.4	9138.7	8401.55	6686.68	7478.18	3838.25	6062.73	9013.25
1	27	11	60A24	CONTIG10637	1673.05	3192.5	1552.2	3523.08	5953.54	7916.82	6756.13	10803.6	6459.27	2258.56	2404.03	3070.89	2247.23	3053.37	1747.46	3311.09	3986.28	2174.72	7738.04	4930.14	8785.85	9288.7	8253.41	12125.8	2206	2040.58	2950.97	2024.57	1412.54	2091.67	25289.9	9584.67	14963.1	7631.45	9414.83	5716.6	2488.26	7704	4785.61	4999.83	6725.36	4055.99	1663.21	1887.31
1	28	11	6e+25	CONTIG10763	14570.4	24481.4	14090.4	4256.78	6417.83	9254.11	5957.26	9234.85	7072.27	1966.72	2023.35	1875.73	3940.56	6383.06	3410.63	9678.17	10994.1	7022.96	6588.84	3409.03	7231.51	9981.78	7670.33	10229.8	4139.53	3593.33	3590.41	1291.48	1389.85	1556.13	11118.7	4603.83	5927.86	9276.65	12762.8	9969.35	732.962	1862.75	1004.36	1558.67	1675.98	1467.71	819.082	773.325
1	1	12	54I12	CD194392	250.686	209.381	244.623	168.746	153.198	225.016	346.583	426.894	191.385	130.404	87.6731	114.33	781.265	212.701	156.91	326.542	313.755	156.94	240.925	192.768	432.055	242.874	435.869	376.726	274.085	316.575	327.294	228.06	183.413	192.776	947.982	457.74	380.77	111.191	265.46	691.214	236.609	446.689	255.93	118.884	143.579	216.033	93.4682	197.74
1	2	12	54M12	CD195224	787.823	1273.29	1169.21	1079.48	1231.76	1498.69	4439.14	4222.2	3387.56	693.573	875.578	892.414	3114.72	1147.96	505.269	1523.26	1356.55	989.986	2597.59	1948	3814.7	2989.53	3867.48	4812.79	2427.35	1522.69	1629.36	470.604	546.632	585.714	6069.33	3423.52	2839.92	3710.94	4701.44	3797.94	2319.64	4134.41	2624.05	1980.56	1513.09	829.588	655.53	487.207
1	3	12	54A24	CD192509	882.846	1411.54	1136.97	273.857	314.451	315.352	516.418	610.077	487.043	1238.64	1744.11	1381.06	4091.38	1268.05	451.115	4120.66	4510.29	2976.57	2646.36	1868.3	4137.83	1662.34	2466.07	3097.2	1005.58	755.757	769.888	655.32	409.02	641.779	4028.02	1895.37	1671.03	892.617	929.529	703.761	448.402	750.527	468.606	884.693	835.324	561.93	256.557	222.032
1	4	12	5.4e+25	CD193695	1604.93	2616.65	2143.01	2864.81	3841.46	5464.64	10257.7	10861.2	9125.21	2661.63	3322.12	2638.4	5248.94	2046.87	873.218	10340.7	10655	7071.95	6475.31	4319.63	8520.62	9547.18	11071.4	13672.1	5584.93	4811.64	5185.72	870.757	749.936	924.85	15321.6	7084.5	8222.86	2986.09	3968.2	2982.86	4683.47	10568.1	6015.11	3716.55	2870.21	1645.14	2255.67	2283.02
1	5	12	54I24	CD194500	882.778	760.132	1154.65	359.455	471.473	526.691	505.411	969.55	928.479	802.603	838.63	721.269	751.746	659.769	532.441	1164.45	1066.44	556.113	949.76	510.14	1167.27	603.968	736.197	859.972	1705.81	1117.7	924.73	949.112	1136.38	1063.06	939.613	611.893	1091.08	1125.41	690.308	832.885	570.027	1835.13	1196.46	793.333	766.324	1565.12	465.797	654.573
1	6	12	54M24	CD195306	148.815	167.572	327.052	210.087	250.293	41.2347	422.701	335.889	247.615	206.743	233.28	71.8942	548.362	306.316	178.864	494.269	585.025	259.419	494.467	291.82	637.901	441.874	615.452	830.612	114.057	203.933	52.0532	167.479	192.195	144.309	908.926	413.988	378.928	450.003	208.79	367.201	88.6488	207.412	55.9339	186.845	130.145	196.952	164.713	244.402
1	7	12	55A12	CD195957	1001.3	1147.46	1210.73	524.46	658.33	867.516	1783.86	2374.49	1610.72	2321.98	2945.99	3133.43	1375.74	827.272	581.023	1281.62	1090.42	509.098	1324.41	803.214	1438.96	1373.64	1445.08	1844.5	1538.46	922.254	982.811	715.579	1114.41	764.245	5655.67	2576.39	3194.75	1308.39	1346.04	1044.62	1720.37	3881.72	2063.16	1117.3	1023.61	1495.66	649.273	686.863
1	8	12	55000000000000	CD196688	223.909	162.474	295.795	83.6486	159.776	67.1011	364.338	441.98	287.778	587.067	499.388	585.466	363.222	221.322	230.523	122.058	181.029	122.771	72.6215	145.241	120.45	94.7021	178.854	194.257	104.926	88.7875	96.528	177.962	90.1521	109.868	478.812	247.88	218.389	359.582	58.716	244.985	280.199	252.39	213.5	393.994	208.741	220.046	124.885	83.4407
1	9	12	55I12	CD197379	68326.2	72245.4	70034.1	3455.82	3787.06	5116.17	7958.31	17980	11990.5	5167.66	6139.47	7186.57	28189.6	12794.3	6367.51	16826	24827.8	20734.9	13286.8	12298.4	20633.2	17972.1	18917.6	24453.5	11139.2	10578	8469.19	5074.23	4195.2	6382.95	25287	12055.1	16465.5	6590.51	10100.8	6698.82	8784.96	10586.6	4918.58	7521.18	6340.29	4390.75	3620.16	5178.03
1	10	12	55M12	CD197977	1354.29	1923.85	1372.83	593.731	724.017	907.631	3872.42	4571.29	3751.86	922.758	1124.48	1282.45	13523.7	6692.23	2995.76	8993.61	11866.4	7233.16	4747.14	3051.07	6112.89	4046.92	5117.4	7306.71	2187.42	2076.99	2428.75	372.967	389.659	454.468	7866.67	3056.15	4077.32	1841.56	2388.09	1745.33	2856.75	5982.16	4440.83	2060.08	1811.99	1035.83	1148.03	1017.18
1	11	12	55A24	CD196008	3188.78	4549.81	3531.51	1552.44	2003.29	2246.66	2638.41	2893.99	2529.2	1198.97	980.543	1423.91	4353.52	2171.51	833.337	3437.78	5144.99	2734.06	6358.43	4651.07	8170.18	5650.56	7022.61	7997.97	3397.16	3239.83	4304.52	2503.47	2023.02	3302.62	10383.1	4314.97	5830.12	1650.17	2562.13	1800.42	1670.4	3724.12	1860.47	3182.04	3176.1	1640.13	2720.25	2716.56
1	12	12	5.5e+25	CD196749	3987.15	5944.94	4725.61	136.606	172.566	351.367	352.745	367.988	451.291	421.972	396.135	422.408	689.972	326.044	194.685	714.045	866.014	611.768	557.78	442.042	928.411	440.14	565.286	809.235	509.084	266.789	206.171	165.486	335.625	238.29	458.923	206.414	347.804	352.259	450.952	320.278	162.242	306.716	259.403	260.458	199.74	175.688	170.904	130.261
1	13	12	94I24	mCA037080	376.845	306.115	622	330.375	306.112	533.286	200.743	368.931	335.73	1185.35	1081.34	1001.26	479.639	562.026	370.208	799.465	864.033	459.322	1080.54	476.26	1090.06	370.788	501.787	575.026	1234.28	775.112	709.22	856.889	1127.07	875.035	550.692	404.489	808.497	285.805	485.396	504.56	611.546	1021.13	574.256	711.603	561.933	668.077	373.795	339.187
1	14	12	55I24	CD197450	346.28	664.858	388.505	85.4425	146.283	144.51	174.38	264.958	145.474	196.838	273.926	341.571	130.537	171.105	114.362	331.752	241.644	157.781	186.548	187.037	175.894	245.962	296.353	413.458	201.801	244.806	160.107	169.385	180.449	251.707	787.894	302.238	487.92	394.448	433.17	304.326	422.131	897.397	666.15	191.79	222.577	156.837	213.624	193.415
1	15	12	55M24	CD198181	1518.82	1669.37	1875.04	821.929	1066.72	2508.12	1058.77	1493.56	1369.38	3063.97	3950.53	4245.53	1025.38	1100.02	666.847	1962.25	1689.58	1210.67	1887.17	746.022	2212.73	890.163	1188.84	1686.39	3252.26	1696.02	1574.98	1277.56	2250.14	2057.76	1370.92	981.744	1740.37	1336.46	1298.81	1082.11	832.912	2584.08	1981.89	1644.61	1508.9	2104.28	1000.38	789.804
1	16	12	56A12	CD199467	1380.92	2306.54	1666.81	610.36	839.792	1163.28	2305.05	3450.08	2765.38	772.373	889.59	1002.89	2514.79	1374.28	627.001	984.261	1522.28	684.842	2185.31	1014.53	2714.36	2871.33	3435.44	4218.72	2297.38	1973.62	2803.89	930.742	780.636	1007.89	4596.54	2150.27	3476.48	382.714	486.223	317.469	960.529	2472.89	1658.65	659.488	952.358	1256.78	1901.28	1940.7
1	17	12	56000000000000	CD200860	954.357	992.743	1137.53	451.532	626.645	922.915	380.05	1440.63	759.26	1068.76	1421.45	1518.85	389.751	858.015	698.524	1069.41	690.868	493.281	1119.53	415.389	625.81	585.616	643.926	633.593	1350.96	888.979	484.106	402.016	843.856	555.281	729.45	656.161	1122.78	669.433	425.459	525.278	336.56	1241.3	1089.13	578.823	505.007	2009.05	318.143	220.538
1	18	12	56I12	CD201558	679.924	696.13	698.258	307.345	587.661	540.089	505.729	685.271	511.717	530.215	645.034	616.749	1403.93	1119.42	562.496	1071.77	1549.82	827.596	2455.71	1717.68	3077.05	3534.73	3227.62	4351.83	837.094	773.995	1058.05	261.32	410.68	254.965	9285.76	3685.36	4715.48	2573.62	3827.87	2368.49	2163.2	5465.74	2743.42	2145.21	2428.34	1594.61	294.178	186.565
1	19	12	56M12	CD202178	1580.48	2497.41	1629.06	153.521	227.036	380.732	175.083	306.658	282.879	438.385	509.573	521.334	303.406	257.672	218.832	611.614	560.24	377.907	723.257	253.718	900.076	350.269	375.897	560.131	474.974	235.095	262.008	216.798	375.567	327.481	234.539	203.744	223.749	273.373	294.204	210.727	163.169	333.994	309.427	366.894	342.797	475.883	133.499	107.127
1	20	12	56A24	CD199773	4301.42	6772.29	5462.89	127.832	306.84	318.567	402.545	921.751	574.1	321.77	407.309	478.821	704.272	645.429	221.608	584.429	674.468	457.47	664.858	280.725	968.435	953.521	958.589	802.101	530.364	404.904	466.889	250.643	225.541	339.436	702.728	422.659	675.115	249.539	297.847	183.504	216.801	541.073	673.55	282.109	228.158	454.146	453.743	277.202
1	21	12	5.6e+25	CD201010	279.371	539.697	248.277	91.7926	192.984	85.3574	96.7923	114.45	123.009	416.769	457.822	561.23	112.3	90.1209	123.343	169.506	180.907	100.68	139.355	141.935	123.713	149.98	123.06	65.7908	98.0201	114.762	164.032	84.956	98.0321	71.6357	120.876	90.5697	119.09	123.175	202.234	94.681	89.0571	78.3619	137.886	120.593	116.485	121.195	81.7354	95.179
1	22	12	56I24	CD201627	1126.84	1587.23	1181.04	172.029	222.741	244.586	188.62	287.512	267.806	613.201	943.633	944.373	207.397	248.884	182.488	396.586	391.384	211.642	487.038	183.058	538.809	193.945	298.172	355.241	501.543	384.075	326.388	364.285	513.923	499.354	320.643	278.63	409.447	306.621	400.612	393.255	211.187	721.776	539.071	462.543	434.969	667.537	311.588	239.256
1	23	12	56M24	CD202278	2879.74	4593.13	2872.18	200.7	384.226	295.554	264.559	404.729	386.809	579.533	716.227	805.167	682.167	798.663	460.27	2032.66	2956.11	1512.4	1992.32	837.385	2108.47	2151.51	1976.76	2995.99	771.916	687.841	840.027	492.778	677.384	706.292	4068.32	1831.48	2546.79	1043.55	1217.77	1029.69	410.055	1338.6	1015.49	906.565	929.831	829.439	399.675	194.362
1	24	12	57A12	CD202964	3753.26	6763.13	3522.12	994.01	1756.61	2032.23	2002.33	3596.92	2369.24	2147.07	1741.76	3158.14	2563.98	2599.36	1577.33	6146.67	8933.53	4872.39	51122	27094.7	40585.5	18752	16315	21400.3	7283.09	7124.62	9772.59	11662.8	9542.24	13797.1	24610	10829.1	20914.6	8621.6	11081.5	6544.86	2525.82	5930	3411.52	9209.73	12198.5	6004.52	441.795	506.319
1	25	12	57000000000000	CF496171	7046.52	10140.8	10384.4	366.733	639.498	784.936	765.715	1190.07	829.761	691.616	924.746	859.565	973.134	1417.49	616.531	1703.96	1970.6	1430.01	1524.51	1075.4	1840.86	1950.01	1626.74	1902.64	763.696	584.051	646.286	431.268	585.306	498.88	1590.84	872.205	999.611	628.243	1380.93	667.274	203.813	414.148	306.141	362.504	414.094	471.479	278.361	208.357
1	26	12	57I12	CF497151	1302.8	2420.46	1586.19	417.922	623.708	838.134	446.665	1009.2	826.352	1047.48	1082.14	1119.77	572.091	838.434	473.957	1250.32	875.645	950.836	1271.18	442.096	1518.68	782.309	679.234	1135.98	1394.45	878.116	734.824	565.79	878.698	977.593	1384.44	879.388	1285.58	832.555	749.217	772.179	445.887	1360.99	1349.1	864.796	816.514	1325.01	611.197	557.678
1	27	12	95M24	mCD038712	689.437	935.488	1433.37	504.915	887.924	1362.58	633.318	1015.07	746.319	974.497	1117.49	968.316	658.787	1236.69	878.721	1435.22	1483.75	855.635	2224.58	624.964	2263.44	987.839	921.462	1166.95	1941.65	1399.7	1367.41	1318.25	1742.66	1658.49	1521.15	1150.19	1677.51	833.245	671.297	612.901	700.599	2720.45	1722.4	1389.8	1153.79	1698.71	862.985	868.248
1	28	12	57M12	CF498215	47279.6	51344.5	34030.4	525.81	736.089	909.161	1135.2	1793.2	1273.84	1391.71	1542.49	1567.97	2460.1	3161.32	1477.01	2996.39	3324.75	3216.62	2687.67	1750.95	2947.97	4261.06	2775.18	3603.86	1320.81	1101.93	997.576	633.33	524.462	765.991	2173.07	1425.59	1285.34	1488.17	2064.98	1653.31	385.221	694.14	361.525	854.171	734.538	534.98	533.465	477.836
1	1	13	50I24	CD179176	520.152	863.964	718.856	281.86	310.129	376.387	1010.2	1239.78	684.452	354.672	407.809	347.343	1999.5	628.998	345.879	1899.79	1794.43	1129.33	2351.18	1667.99	3517.86	2385.61	3017.07	3595.09	351.002	266.388	200.613	302.423	254.347	381.004	1224.81	612.939	472.539	764.848	756.026	758.448	220.342	313.414	316.045	323.063	258.487	274.636	289.853	326.234
1	2	13	50M24	CD180180	1221.63	1078.45	1322.98	841.415	770.019	1465.47	2339.11	3036.01	1840.06	1236.03	1526.95	1155.72	5607.26	2277.72	791.825	3982.61	5011.85	2775.06	4926.29	3083.22	8259.09	3422.88	4254.71	5073.76	2281.31	1929.22	2145.82	998.476	829.713	828.862	6656.24	3356.23	3785.14	3473.51	5569.63	4720.69	3013.45	5657.11	2921.84	4391.75	3358.54	1191.27	840.801	869.251
1	3	13	51A12	CD181251	276.76	360.512	351.143	118.516	224.896	98.5398	245.962	265.45	207.493	132.271	178.587	137.905	266.789	218.882	133.126	383.384	345.467	179.746	260.666	113.26	315.816	134.764	227.095	262.661	357.312	300.912	90.4563	111.741	130.478	153.241	246.6	170.982	196.066	213.491	181.26	210.799	188.976	224.048	260.406	105.89	110.479	303.995	138.153	87.6874
1	4	13	51000000000000	CD182021	5223.18	6758	7051.2	216.296	304.944	352.637	789.17	980.595	779.737	1891.68	1905.09	1755.66	1880.48	737.476	303.261	2236.58	2193.72	1554.55	1258.15	693.517	2000.28	989.249	1539.82	1783	1279.26	682.843	603.837	490.052	568.169	537.834	1294.28	714.444	877.53	560.54	1025.15	851.624	452.837	753.826	421.29	527.186	394.833	468.298	292.224	222.474
1	5	13	51I12	CD183234	202.933	219.812	178.533	63.2114	132.61	55.6535	262.842	246.663	170.491	760.663	677.524	837.248	238.696	177.17	176.196	240.184	384.634	161.86	315.263	184.575	399.618	282.537	446.126	454.457	275.297	211.685	180.359	173.766	179.271	167.258	714.05	325.976	299.711	257.807	121.028	249.25	261.43	361.653	238.045	197.798	191.34	240.99	140.65	180.767
1	6	13	51M12	CD184452	801.471	906.249	1112.29	170.163	354.657	284.306	239.404	399.177	319.272	1126.17	1246.49	1116.21	276.606	334.405	267.978	787.734	478.147	252.653	522.078	362.464	461.35	275.785	443.913	508.194	872.42	510.892	276.965	283.753	433.278	347.91	402.351	268.172	321.314	428.797	310.364	367.707	164.921	431.407	352.716	257.667	295.338	417.694	155.185	88.3751
1	7	13	51A24	CD181317	1404.74	1960.38	1653.47	2010.22	2737.26	4083.03	8762.53	10708.8	8519.3	1638.09	1606.54	1745.47	8135.62	3958.41	2032.28	3639.53	4211.45	2348.04	6082.78	4608.52	8612.19	7808.88	7992.66	10973.8	7143.51	6068.3	7573.94	2665.83	2306.72	3133.85	21289.8	9804.72	12253.3	5950.44	7587.97	5618.35	5899.04	12711.6	6917.93	7766.93	6834.92	2779.99	3632.46	3534.7
1	8	13	5.1e+25	CD182144	282.255	354.452	352.401	353.796	589.666	384.351	1095.55	1311.56	973.915	618.565	602.141	456.541	1157.12	558.786	338.87	820.524	887.246	478.034	893.592	628.05	1348.26	1303.34	1331.55	1799.93	524.664	379.929	367.237	178.081	203.32	172.421	3508.95	1569.36	1857.14	671.165	729.867	769.538	643.376	1139.97	809.056	296.195	353.681	316.825	328.081	364.338
1	9	13	51I24	CD183384	1015.8	1605.73	1164.15	89.9158	140.107	178.493	145.72	236.587	232.489	483.492	460.217	400.444	204.462	154.993	138.03	275.367	249.009	124.606	257.557	136.73	269.457	277.152	308.079	365.831	245.549	240.257	147.899	179.049	170.746	239.743	372.466	164.805	266.543	270.694	174.762	139.593	98.03	226.832	190.965	105.003	99.814	141.45	158.101	74.7035
1	10	13	51M24	CD184648	430.862	546.948	530.497	68.7175	217.926	360.016	239.062	368.373	354.516	390.454	451.024	301.069	394.535	231.796	169.435	404.866	344.468	185.234	375.503	327.93	386.997	364.885	418.282	458.531	455.932	300.614	222.539	239.989	321.843	286.491	869.356	392.967	438.795	273.518	276.806	253.86	246.936	416.366	341.555	287.238	259.005	323.847	213.513	147.17
1	11	13	52A12	CD185303	2062.38	2996.44	2723.57	124.315	185.784	103.987	333.99	370.464	448.427	364.245	409.497	301.758	826.12	354.379	142.515	610.475	754.851	541.449	471.435	233.343	559.479	444.211	643.764	799.472	316.124	193.18	255.379	148.29	163.787	131.369	611.922	264.482	380.894	161.302	258.322	253.027	153.301	234.3	266.194	186.901	182.24	127.471	148.062	122.702
1	12	13	52000000000000	CD186278	884.022	1328.59	1033	47.4292	144.411	132.442	127.735	66.7125	118.675	93.6438	87.875	103.63	145.364	113.627	104.375	198.648	156.978	93.4455	187.932	3662.83	94.8804	131.173	113.099	122.479	102.498	79.9351	166.751	108.585	90.6178	86.4695	152.652	115.482	151.695	203.829	153.678	116.199	114.7	122.982	168.059	136.945	89.671	90.3551	68.4684	91.796
1	13	13	52I12	CD187196	2717.87	3985.42	3303.26	1239.46	1554.21	2361.06	6235.11	7678.75	6423.17	1161.75	1273.76	1377.65	4068.23	2865.76	1478.96	3649.01	3412.57	2374.45	3668.2	2258.6	4121.89	3035.26	3362.31	4776.56	6393.66	5221.77	6100.23	1275.88	1407.42	1480.68	6594.97	2715.06	4685.09	1216.57	1634.64	1114.19	1287.49	2834.73	2009.31	1529.58	1621.73	1815.08	537.31	379.39
1	14	13	52M12	CD187895	995.111	1467.34	1158.93	536.009	810.413	812.736	1540.47	1979.27	1504.09	747.692	1050.31	1267.61	3458.75	1991.02	746.943	1675.04	2198.9	1147.43	2811.92	1703.77	3691.45	2431.56	3182.16	4487.54	1348.46	983.157	1536.76	1257.68	982.545	1562.94	7442.86	3157.67	4243	997.647	1271.32	964.105	782.078	2161.03	1259.95	921.746	1158.74	842.842	614.48	540.792
1	15	13	52A24	CD185396	171.518	124.529	143.055	35.6797	98.4077	51.0303	96.4415	105.774	104.813	997.48	900.505	1316.75	82.9812	79.8421	74.2209	193.135	127.457	107.426	122.752	93.303	119.768	169.863	187.032	205.002	125.306	244.606	154.009	68.2701	127.02	161.586	352.268	156.871	95.3182	114.044	71.1356	69.8928	61.0628	141.972	161.437	67.3837	109.009	101.416	107.411	54.4217
1	16	13	5.2e+25	CD186407	72374.7	84740.6	82329.7	41636.3	35481.2	56632.2	58737.3	61498.8	61037.6	25004.3	31498.5	38254.2	59730.4	55904.9	34965.8	60100.9	62970.6	62778.2	61155.4	60653.9	68876.9	60874.6	55538.2	58891.5	61418.5	61699.8	59891.8	55907.7	56009.1	59138.2	64172.8	54135.8	65759.3	31626.1	51494.4	33153.3	62804.9	65844.5	61769	52673.2	58378.7	50325.8	65622.3	75678
1	17	13	52I24	CD187282	19437.2	29002.3	20315.9	325.983	492.202	605.605	1133.48	1940.11	1610.22	1927.23	2346.77	2910.13	5636.72	3281.18	1573.43	3295.2	4839.64	3555.89	2621.44	1742.91	4059.82	3807.03	3772.83	3690	2759.81	2706.96	2572.99	838.692	734.665	1260.15	2201.55	1239.13	1731.79	318.962	560.789	410.525	3062.45	6032.75	3169.22	1311.14	1368.42	1771.48	685.119	716.56
1	18	13	52M24	CD188035	811.996	1272.7	985.451	299.939	418.84	473.797	868.061	1485.14	1101.63	1788.1	3467.27	3511.44	1059.58	1030.46	595.027	743.622	668.578	407.069	1110.06	600.333	1056.56	1088.62	1205.51	1545.35	771.452	483.032	437.724	253.171	375.458	294.068	2292.37	947.831	1700.13	804.126	1078.6	748.497	243.946	649.669	572.349	375.377	356.598	789.739	282.707	152.845
1	19	13	53A12	CD188990	21726.8	25163.7	26257.1	1177.85	1312.93	1934	1565.36	3664.18	2627.87	4774.26	6932.74	7608.39	2926.34	3207.69	1915.52	4621.04	5221.85	3814.93	2679.4	1810.21	3126.55	4084.79	3518.74	3798.15	3294.36	2167.86	1522.28	884.281	1351.17	1224.19	2855.8	1411.02	3029.1	1630.01	2564.04	1588.27	1153.49	2162.03	1210.87	1587.82	1366.94	1881.36	883.641	692.166
1	20	13	53000000000000	CD189666	6636.63	10226.9	6621.78	2371.62	3012.77	4240.47	2392.28	3482.13	2658.56	669.535	735.057	1011.58	8006.02	6975.21	3161.02	11399	13793.7	8501.65	15902.1	10430.9	18162.1	12931.8	12646.8	16217.7	1395.06	1111.94	1875.27	1798.76	1336.47	2057.32	11590.4	4104.77	7175.46	4541.82	6320.68	4117.99	1444.5	3690.92	2202.74	2836.33	3578.48	1995.64	1067.08	1047.84
1	21	13	53I12	CD190573	2334.39	3713.95	2557.32	8224.13	11340.8	15131	18689.5	28325.2	20672	5824.17	5853.35	7761.74	8587.53	8942.09	4162.23	5960.6	7529.2	4028.62	14471.7	8866.16	17206.5	15444.1	14977.1	18695.8	8764.51	8322.52	11685.2	3312.34	3047.91	3719.83	29366.6	12458.7	19173.9	3294.03	3936.59	2927.36	5602.94	17506	9947.27	3369.02	4120.63	5326.41	13196.4	15416.7
1	22	13	53M12	CD191863	998.438	2051.05	997.507	352.101	477.206	741.627	571.469	991.478	764.759	1036.36	1282.74	1590.68	757.727	828.259	505.633	1362.22	1891.98	1063.36	2105.94	1150.25	2449.14	2440.16	2319.84	3267.1	475.403	364.769	594.566	204.441	245.583	255.994	1730.79	737.324	1251.26	1581.24	2040.32	1374.98	408.725	978.39	694.942	516.072	618.42	377.673	305.231	344.245
1	23	13	53A24	CD189074	229.698	389.143	220.428	93.7067	242.632	128.278	159.661	189.737	155.398	326.518	415.167	400.461	270.756	217.725	166.495	371.851	493.972	262.65	720.738	504.26	917.596	876.438	921.945	1204.35	224.054	198.609	280.957	414.529	345.897	403.567	858.4	386.992	591.075	362.749	455.728	486.945	222.975	394.412	421.87	288.531	340.162	350.517	227.63	320.216
1	24	13	5.3e+25	CD189763	2271.45	4484.14	2565.43	320.256	454.706	722.417	707.002	998.835	947.698	1634.86	2269.68	2560.63	539.211	789.2	351.875	1358.55	1420.91	976.582	1278.13	523.691	1489.55	1152.99	1111.53	1286.21	978.82	564.208	440.434	370.73	516.59	505.56	973.83	509.421	790.33	283.408	380.782	297.079	200.817	435.284	533.695	321.017	359.699	462.9	239.148	247.552
1	25	13	53I24	CD190702	1695.86	3250.7	1943.82	1207.82	1893.42	2626.89	1219.78	2332.5	1421.61	2009.6	2178.3	2693.22	2378.81	2716.09	1302.84	3110.04	3800.3	2396.08	3834.35	2319.14	4740.89	2921.42	2820.15	4130.3	1302.68	886.646	1094.64	1097.62	948.459	1232.62	11870.4	4384.41	7204.97	2282.19	2672.67	1704.73	1038.9	3121.91	1828.04	1214.79	1375.9	1483.61	891.545	961.186
1	26	13	53M24	CD191991	1080.77	2223.64	1154.32	704.684	976.654	1519.87	4809.68	7653.15	5289.66	710.624	710.624	712.721	2676.95	3249.92	1712.04	1457.86	1755.09	1033.34	3475.51	1874.38	4093.78	3896.95	3893.38	6067.69	2690.82	2703.23	4406.97	1890.35	1118.43	1956.73	8699.97	3169.47	4521.62	1173.36	1316.31	914.984	1485.98	4154.92	2525.02	1736.51	2240.59	1120.61	1257.15	1391.08
1	27	13	54A12	CD192441	913.808	2038.09	1062.16	728.438	1525.78	2087.74	933.764	1831	1197.93	525.453	578.05	705.354	844.177	993.11	638.891	1304.97	1468.59	950.695	1573.92	767.645	1684.67	1344.19	1476.44	1994.94	862.104	864.46	992.494	1208.99	747.465	1192.4	2538.45	743.87	1691.96	810.346	844.787	655.964	375.508	904.574	672.562	587.553	670.288	918.631	459.515	457.028
1	28	13	54000000000000	CD193595	606.271	1305.39	690.837	197.731	387.942	464.09	358.711	751.326	470.771	403.266	504.295	461.6	636.722	842.023	541.771	963.93	743.023	678.714	1111.06	524.182	1200.33	1305.47	1280.96	1973.74	1118.38	759.819	841.077	701.522	715.079	685.599	3075.01	1103.52	2048.58	3974.5	4874.39	3083.77	333.895	1154.62	782.924	584.692	562.579	493.166	181.084	246.842
1	1	14	47M12	CD163715	133.418	179.71	211.591	38.6787	485.11	164.546	101.754	95.7152	90.0779	396.119	554.897	241.639	96.5254	85.3952	122.574	338.997	248.372	197.646	125.218	131.994	160.959	104.981	161.298	110.397	133.747	60.0757	168.111	93.7568	33.7772	166.821	209.9	104.318	78.4652	346.746	193.555	118.837	111	167.516	194.459	82.62	55.0048	106.965	91.9882	875.378
1	2	14	47A24	CD160709	297.438	285.187	225.897	71.4562	332.48	82.6585	135.701	82.4602	96.5949	240.4	263.612	220.245	142.463	112.969	116.535	274.872	226.551	145.609	149.675	183.28	217.124	231.219	218.908	280.454	143.551	144.715	110.488	89.5324	107.861	73.1147	162.781	109.608	129.414	113.255	158.94	112.384	80.5715	162.491	205.715	87.6591	104.402	71.517	84.0653	135.49
1	3	14	4.7e+25	CD161971	488.935	422.595	597.635	263.515	627.809	515.687	412.932	790.507	596.881	1184.38	1175.81	1070.02	485.827	470.371	582.144	1172.6	879.385	424.613	639.619	431.882	645.998	521.648	507.108	563.27	1002.24	620.84	472.575	529.861	694.308	715.896	481.08	586.019	632.976	618.41	623.139	632.445	552.392	1194.04	761.393	494.765	437.624	1214.54	470.429	323.705
1	4	14	47I24	CD162865	101066	99152	118449	9863.59	9025.93	17499.2	28118.3	46540.7	33779.2	21493.8	22247.7	21361.8	65818	56903.2	35587.7	65402	62252.6	59090.6	47198.2	42441.2	58466.5	57316.1	56577.9	65300.3	36593.7	33886.5	22550.2	9016.39	7048.99	9850.95	50436.7	28239.8	27240.2	14033.2	26361.3	18752.9	17332.5	21189.6	14850.8	10249.3	9226.82	9203.36	7687.36	9484.83
1	5	14	47M24	CD163844	2175.86	2456.61	2719.65	108.612	210.533	243.801	304.993	410.426	388.536	653.638	709.904	569.91	579.671	306.587	184.321	919.406	727.075	446.64	482.573	284.995	621.408	421.516	619.148	690.058	452.869	323.036	282.406	272.667	239.564	218.793	670.892	341.376	414.689	282.361	390.165	326.726	141.234	202.72	225.6	224.507	169.45	195.669	148.089	72.1181
1	6	14	48A12	CD164663	197.937	107.458	182.261	204.44	235.253	284.157	288.239	257.739	123.357	717.382	739.334	525.374	76.6519	191.739	236.094	362.208	253.538	194.694	332.618	169.212	407.445	94.3318	264.67	227.785	440.909	397.339	353.353	514.106	596.141	567.621	225.679	129.151	131.44	457.894	54.6195	318.795	183.096	386.249	188.343	412.519	214.72	429.209	94.4794	665.047
1	7	14	48000000000000	CD165551	1221.55	901.32	1707.48	675.47	912.852	1415.24	1356.06	1760.29	1649.06	2488.31	2557.51	2213.72	1548.45	1238.43	938.546	2577.52	2185.44	1253.98	2313.64	930.759	3072.54	1111.34	1324.93	1893.47	3511.93	2187.73	2102.83	1985.83	2976.9	2906.13	1965.35	1378.41	2204.54	1729.34	1548.76	1497.94	1277.4	4185.31	2288.16	2196.83	2022.32	3263.56	1099.59	1353.48
1	8	14	48I12	CD166334	150.217	200.064	204.795	189.366	177.436	151.551	159.334	133.473	140.822	95.7504	67.8057	82.9349	93.0374	75.8115	180.674	150.436	134.744	79.9378	75.9632	125.29	111.28	119.637	135.907	180.65	85.878	119.872	99.4784	105.957	89.415	105.761	225.956	169.297	87.9781	71.8222	101.636	217.026	93.0805	75.962	66.3479	95.7117	76.9379	104.092	59.6176	83.2165
1	9	14	48M12	CD166936	2263.65	2901.41	2269.39	152.661	180.833	157.172	395.659	637.224	449.441	292.279	258.653	248.745	693.84	358.438	263.611	962.036	1229.56	575.448	932.778	637.798	1228.28	1079.51	1110.91	1529.22	296.795	348.932	253.32	165.169	171.232	149.158	1246.57	492.35	774.355	907.607	1177.41	929.885	264.312	533.495	439.803	301.696	279.339	298.241	182.132	143.182
1	10	14	48A24	CD164875	1026.56	1367.73	1308.86	247.508	502.494	559.626	504.489	950.146	731.817	2037.85	2100.17	2156.8	568.767	597.622	367.38	895.886	527.576	424.695	685.343	375.287	823.543	446.137	588.753	724.48	1328.08	652.845	511.415	439.718	731.419	623.011	721.884	557.803	991.123	699.962	490.099	599.571	437.071	1239.01	859.018	583.255	546.241	1000.17	352.84	297.368
1	11	14	4.8e+25	CD165658	4096.92	3830.03	5987.26	3254.26	3921.9	6691.61	5008.49	6995.82	6179.87	5447.14	6032.76	5537.85	4758.34	4842.97	2357.8	8060.48	7875.09	5748.47	9522.14	3625.83	10485.1	4110.67	4868.15	6310.33	13047.4	7981.73	8339.02	4982.18	7939.45	7212.21	5852.35	4855.19	8479.38	4516.26	4661.38	4461.18	5754.54	11397.4	9032.16	7734.77	6912.68	10635.7	4147.6	4567.55
1	12	14	48I24	CD166467	178.07	133.659	117.939	113.06	160.004	122.359	55.7236	180.974	141.39	579.37	578.872	376.478	120.885	228.71	113.913	195.616	240.989	61.5811	217.338	4072.61	200.907	94.5108	152.862	103.853	275.316	190.805	156.635	123.447	153.775	146.775	228.948	143.436	196.917	154.053	59.7384	169.569	82.04	253.808	288.593	123.992	117.013	316.864	107.915	167.285
1	13	14	48M24	CD167007	2269.64	3914.19	2859.72	665.002	913.987	1270.6	1649.37	2044.09	1741.54	297.051	326.089	369.039	2095.5	1470.57	708.687	3352.25	3567.04	2529.46	2784.36	1795.8	3178.17	2807.31	3207.82	4534.95	1247.6	842.239	1206.45	402.736	455.486	495.395	7019.17	2960.73	4753.75	1864.71	2810.03	2025.18	1748.26	4040.8	2646.4	2735.61	2319.47	1185.46	974.367	848.62
1	14	14	49A12	CD167676	3902.88	4766.82	4797.83	7630.36	9659.58	13355.7	11360.9	14232.8	11164.3	6201	5299.36	6503.15	21591.1	17166	7466.12	13384.6	16678.6	9431.12	24448.8	19268.9	31673.8	16141.4	15381.8	21315.8	8560.54	8291.45	11920.7	10205.8	9255.33	11411.8	33404.4	14802.5	23104.5	11659.4	19649.5	13811.7	8575.39	18597	11002.8	27543.7	23477	7761.57	7286.6	7336.17
1	15	14	49000000000000	CD168482	37.2105	50.1951	45.7883	224.21	138.134	149.811	231.119	44.5233	190.367	283.777	355.363	372.438	127.341	47.562	85.9594	33.92	75.1919	38.5762	65.1403	58.2238	38.1239	49.0042	40.2639	33.8477	87.7645	59.535	72.0093	181.717	71.868	78.3106	36.4935	22.6302	86.7605	10.5232	17.8583	50.3431	213.889	156.136	39.2894	21.1946	504.967	44.8353	223.055	330.32
1	16	14	49I12	CD169484	1730.6	2492.66	1856.48	236.351	364.679	438.092	490.675	819.959	620.493	695.073	760.76	968.427	932.173	700.998	335.81	1260.08	1263.06	1020.86	1007.36	500.159	1327.16	1048.81	1392.5	1769.84	892.671	602.221	545.719	414.791	596.415	555.882	1170.53	504.696	944.312	319.841	452.651	472.665	257.851	698.343	610.033	449.773	348.815	652.075	277.769	208.942
1	17	14	49M12	CD170755	512.302	752.069	586.741	107.371	342.937	91.7224	150.304	274.071	173.451	204.082	180.14	186.522	214.879	168.237	148.272	249.012	390.441	210.082	228.59	145.957	215.042	277.434	490.449	451.82	195.924	175.254	160.25	167.331	126.585	129.745	424.925	229.708	356.775	426.655	658.689	582.58	212.966	221.162	198.464	228.365	186.773	169.515	114.265	145.288
1	18	14	emp	emp	51.2549	52.5188	155.128	180.263	297.212	94.63	29.7673	111.801	139.182	176.805	213.736	76.2082	184.654	160.5	177.617	109.032	122.691	98.6704	49.145	77.1845	122.031	28.6068	68.127	85.8685	32.4606	33.6727	142.135	135.647	57.9629	238.106	99.4277	49.9562	32.1728	43.2807	80.0733	276.34	106.23	97.4558	87.3058	60.7234	87.2553	253.742	442.485	70.9566
1	19	14	49A24	CD167766	811.657	1065.8	962.619	529.764	515.208	702.844	450.28	1056.58	707.677	1277.88	1686.7	1870.37	930.97	1100.52	622.008	1287.35	1350.78	882.519	1502.09	755.121	1629.39	1540.61	1611.13	1773.75	886.069	576.769	387.063	326.867	543.068	521.009	1438.84	688.6	1249.82	749.227	719.178	637.928	438.027	1106.89	743.125	448.502	478.435	937.332	489.606	234.048
1	20	14	4.9e+25	CD168674	59351.6	63452.6	61263.8	3457.24	4176.88	6902.18	6622.34	12911.6	9649.93	3727.61	5398.06	5313.71	15490.1	14189.3	6690.1	14502.1	16839.8	18731.2	11539.1	10699.5	15266.5	23378.1	19481.2	19434.3	14175.5	15002.4	13895.8	2831.55	2816.84	3538.7	13592.1	9045.9	12643.4	4184.84	6689.54	4930.37	5395.38	8371.84	4822.39	3639.84	4788.55	2907.93	3869.12	4660.06
1	21	14	49I24	CD169584	10385.7	13567	10138.5	252.978	408.596	464.237	520.588	882.994	645.056	563.003	775.37	626.26	721.298	812.94	389.846	973.364	1222.78	794.293	1173.95	547.17	1177.26	983.585	1037.84	1190.77	891.17	539.702	482.876	525.964	728.896	646.756	3444.89	1257.06	2394.13	4973.4	6596.16	4501.16	1085.05	2436.8	1753.91	1191.27	1476.52	1655.7	346.383	347.878
1	22	14	49M24	CD170873	2939.42	5317.11	3643.52	343.609	347.504	488.245	414.799	786.505	553.521	566.541	521.616	591.398	589.737	752.776	387.99	1113.55	870.403	732.914	1032.72	432.508	858.35	631.418	897.291	804.735	1052.55	594.079	552.512	349.313	627.614	529.678	649.657	468.74	781.737	407.937	500.265	518.161	227.57	595.98	624.23	468.299	478.015	969.901	253.407	203.729
1	23	14	50A12	CD177698	86295.4	82876.4	88510.1	12131.7	14967.3	21186.9	11993.8	27819.7	20160.3	8161.65	11112	12171.9	32940.2	33886.4	17238.8	33265.8	41845	42526.4	32755.4	25322.7	39566.8	45717.4	35874.6	46865.7	24847.7	24990.6	22819.7	13322.1	10725.6	15641.5	39269.8	17458.2	34906.2	11465.4	17385.5	10881.1	18066.5	26465.3	16795.2	15807.5	16390.2	8708.58	14148.3	20747.1
1	24	14	50000000000000	CD178485	2206.17	4555.53	4036.3	239.326	354.082	425.166	384.695	804.271	588.954	654.253	782.08	722.878	459.364	502.771	353.63	1131.21	850.114	801.771	986.866	297.589	873.09	612.13	652.281	796.13	1098.66	596.06	318.756	261.213	579.594	554.59	509.141	383	684.111	342.234	324.943	349.907	234.627	606.936	606.102	443.393	375.415	750.462	274.581	220.888
1	25	14	50I12	CD179108	3303.16	5444.83	3510.47	5735.87	8271.28	11363.4	15626	24675.5	17322.2	3993.02	3504.61	4169.58	24292.1	27766	16552.4	33343	40578.8	24783.5	47550.8	39069.7	44004.1	37794.1	30392.1	41092.8	14094.4	15428.7	22548.1	7570.42	5358.12	8016.95	39424.8	23071.4	37356.8	25333.1	34795.5	22199.9	22522.4	43964	28199.5	45928.9	52576.6	19650.1	17444.4	20338.4
1	26	14	50M12	CD179983	5837.66	10308.5	6044.36	511.58	764.086	560.11	633.2	1537.37	868.348	3379.12	2988.33	3494.47	1264.06	1197.31	760.432	2301.31	2118.6	1607.14	1824.51	1034.42	1702.84	1006.54	1278.56	1643.38	1219.7	742.797	577.976	464.882	635.425	586.874	1242.3	602.972	920.285	466.816	805.042	489.487	298.271	581.316	620.048	467.735	412.928	1175.58	232.566	235.186
1	27	14	50A24	CD177785	1539.88	3243.95	1599.86	285.363	571.855	611.648	315.49	685.838	521.749	306.867	379.956	340.135	337.082	494.642	290.589	836.67	949.306	540.37	713.035	330.822	696.081	648.388	712.056	976.147	245.688	177.914	291.287	100.903	167.376	136.639	572.949	290.657	380.439	141.507	192.195	130.917	130.354	247.748	269.536	157.529	124.947	250.302	163.436	101.384
1	28	14	5e+25	CD178582	374.406	877.033	269.113	538.562	1157.31	809.07	775.635	1265.16	827.5	504.996	510.339	661.778	984.919	1142.91	696.97	439.486	756.731	429.585	1359.66	853.791	1487.68	2308.44	2056.62	2868.13	804.405	1047.98	1381.38	1199.3	870.934	1169.12	6449.28	2390.64	4240.56	477.046	3627.62	373.646	678.846	1294.27	764.538	452.345	531.342	706.474	570.542	723.632
1	1	15	44000000000000	CD148464	1294.86	1915.63	2008.43	124.914	1575.26	128.053	253.388	304.006	272.405	517.411	598.205	246.983	641.19	144.12	159.573	463.645	336.557	422.366	312.426	183.518	688.488	325.907	437.464	401.389	365.767	196.894	172.704	142.967	140.715	169.691	310.707	194.88	149.57	123.843	269.67	238.277	228.209	309.238	336.314	164.036	156.967	148.136	109.486	248.97
1	2	15	44I12	CD149529	2432.85	3867.83	4014.51	355.143	734.918	773.516	1289.17	1483.92	1018.71	2770.73	3061.25	2611.6	1214.68	608.472	439.713	1668.03	1010.21	992.37	1079.73	499.089	1578.54	510.184	899.6	1061.61	2207	1216.51	812.815	917.612	995.306	1099.95	870.406	733.84	761.23	818.208	849.214	861.193	472.059	1392.15	984.804	651.665	706.675	1149.71	563.17	290.599
1	3	15	44M12	CD150304	964.347	1335.8	1433.8	840.495	1210.3	1199.28	1096.96	2735.67	1912.59	1510.61	1663.69	1122.61	1109.33	1310.23	969.326	2652.01	1390.99	1140.63	1554.21	738.771	1206.29	1126.67	1186.98	1098.77	3171.39	1679.07	973.934	862.133	1211.5	1114.53	1421.36	1424.72	2281.88	1220.98	1056.36	1038.93	846.949	2621.09	1733.79	876.012	730.31	3256.85	1011.39	674.566
1	4	15	44A24	CD147472	374.28	419.956	471.005	431.681	925.071	633.237	3329.92	3492.01	2920.29	1115.27	1310.54	1171.74	635.531	459.283	381.246	1039.21	931.026	477.41	521.422	489.578	733.391	352.091	401.028	518.206	946.705	624.668	533.041	457.092	941.32	618.914	5072.05	2610.88	3032.17	838.08	944.033	737.509	747.368	1569.77	888.694	435.785	447.86	783.929	507.367	493.409
1	5	15	4.4e+25	CD148718	699.381	729.895	895.469	1460.54	1608.26	1840.25	4894.84	4515.77	3813.87	1162.71	1058.73	1184.37	2761.77	1336.6	474.758	1448.21	1712.94	843.969	3462.26	2919.49	5307.35	5183.05	5583.73	6569.2	3185.96	3203.74	4141.85	3474.39	2452.9	3556.57	25230.9	12306.2	11652.6	2218.96	2719.11	2528.33	3450.5	7451.33	3322.72	2198.52	1620.53	988.112	3239.79	2989.06
1	6	15	44I24	CD149661	2021.53	2512.74	2296.8	1284.09	1924.81	2655.92	1995.46	2112.82	1779.27	983.522	1017.44	1030.64	38165.7	15908.8	9333.1	6715.6	7086.58	4343.26	2829.01	2146.69	3301.02	3767.77	4307.28	5347.45	3898.38	3123.23	3215.6	3066.87	2513.91	3667.86	13385.5	6026.95	9085.91	5062.68	5832.39	4249.56	9059.08	16750.5	10402	5464.67	6224.43	3821.29	1416.28	1453.12
1	7	15	44M24	CD150479	169.481	180.481	117.145	621.745	718.295	894.902	676.962	1235.08	907.571	6614.24	8438.8	7295.07	135.745	40.1174	208.502	121.906	101.045	47.6486	81.7359	49.9514	49.0595	773.489	813.452	4.17283	39.1882	58.8821	45.1155	999.202	1368.13	1357.35	25.8443	104.242	1181.29	1088.42	1260.68	918.673	857.193	1977.64	1489.06	941.525	900.182	1577.26	639.632	525.924
1	8	15	45A12	CD152479	1137.45	1157.86	1318.29	1053.07	1285.61	1666.96	3036.55	2602.42	2219.48	1211.02	1290.49	1608.78	4573.94	1444.13	838.313	8174.82	10464.4	6124.63	13275.1	11835.9	16283	18589.5	18912.9	22185.7	4106.17	4694.6	5439.03	1496.02	950.656	1554.84	7637.95	3384.89	4976.17	3033.94	3714	3177.09	4147.6	6733.52	2450.44	3032.19	3084.45	2189.47	501.764	709.405
1	9	15	45000000000000	CD153342	2074.6	2748.05	2372.28	1542.67	1940.54	2710.49	3127.48	4044.42	3110.79	2993.88	4141.29	3880.71	6867.95	3722.01	1727.48	8069.42	7448.1	4862.32	9322.57	5703.4	9633.17	6439.23	7352.76	9563.59	4167.65	2697.51	2993.7	2526.62	2482.91	3145.49	10713	4798.7	7406.05	10084.8	14348.4	10152.7	2288.22	4785.67	3203.68	3875.93	3123.76	2402.11	1782.14	1650.79
1	10	15	emp	emp	34.7324	90.5304	124.5	87.055	324.474	122.592	30.1946	14.0021	179.493	94.1044	163.98	64.3709	32.8347	81.2417	185.425	44.9051	48.1186	98.3425	7.23004	71.1603	108.984	121.354	82.7859	153.893	29.5312	77.5897	47.1848	360.718	292.506	124.594	28.9725	103.229	77.4192	79.1134	122.185	225.96	13.1703	81.6498	97.5987	42.7716	67.8297	64.9144	224.384	1555.1
1	11	15	45I12	CD154270	615.284	794.552	705.489	218.729	386.307	371.084	197.845	398.3	327.088	209.974	209.22	226.605	920.889	460.96	348.663	744.628	636.167	432.634	399.615	621.096	569.614	577.273	657.77	908.678	328.129	292.515	283.173	289.642	238.764	253.855	1376.23	582.14	964.208	877.778	1070.27	787.521	159.723	272.553	200.315	284.628	359.83	198.998	116.729	55.5967
1	12	15	45M12	CD155697	2451.23	3486.58	2669.15	2812.73	3952.8	5562.91	5737.06	6131.46	5611.03	3861.76	4690.77	5673.9	21738.1	10931.9	5852.69	8781.87	8875.28	6257.1	8999.47	6876.22	10606.9	13659.2	12330.8	16587.4	6353.4	5599.13	7025.37	4347.93	3307.21	5147.47	31436.5	13054.2	24685.7	16523.5	23330.3	15814.1	15654	29151.3	19203.6	12248.6	13407.9	10049.4	3683.49	3661.17
1	13	15	45A24	CD152548	746.36	1016.87	928.779	412.495	566.069	656.789	972.233	1393.79	1094.73	2159.46	2538.69	2839.56	653.604	886.599	628.453	1252.2	967.702	599.404	814.513	675.68	816.218	620.805	705.124	829.787	1556.45	959.061	570.804	461.538	816.116	665.029	2319.93	1252.26	1540.61	2267.34	3022.15	2375.41	496.807	1269.73	1118.77	585.515	560.175	1362.24	410.308	264.372
1	14	15	4.5e+25	CD153442	8479.13	11039.4	14480.6	6131.57	7634.99	10439.2	5271.21	11080.4	8958.53	16141.7	22767.1	20310.5	6501.81	9659.62	5209.36	13967.9	9316.14	7298.94	10955.8	4863.38	9880.48	5452.2	6589.75	7754.04	18992.4	11338.7	7838.37	5908.24	10500.6	8363.72	8083.22	7272.33	10177	5713.08	7400.1	6118.43	6094.89	14728.8	11978.7	6349.29	6257.46	17025.8	5524.31	5275.18
1	15	15	45I24	CD154502	270.186	410.664	292.652	201.982	177.274	107.59	136.473	177.791	193.716	399.612	301.922	354.179	166.09	106.654	125.972	184.688	139.508	163.739	115.071	148.653	193.333	151.045	159.258	196.972	89.1823	119.755	257.347	108.35	86.8125	96.6393	549.358	191.186	248.195	167.789	125.218	105.37	179.567	147.742	126.837	82.9313	119.459	130.003	71.1615	91.167
1	16	15	45M24	CD155780	3720.09	5728.79	4602.19	1707.56	2608.85	3219.85	4160.72	5364.49	4042.63	1454.94	1758	1986.7	2640.25	2028.09	1110.52	3001.79	3227.55	2024.69	3267.37	1947.53	3742.28	3699.25	3918.7	4893.69	2486.72	1802.86	1958.85	1540.73	1804.74	2027.99	9224.35	3413.3	6462.55	1725.37	1916.62	1613.33	1571.1	3738.7	2713.01	1502.97	1610.36	2083.97	1503.48	1335.4
1	17	15	46A12	CD156605	577.204	842.393	829.584	322.928	383.874	528.203	314.1	802.329	681.482	1794.1	2774.03	2397.72	362.991	550.246	404.342	638.604	551.618	392.558	497.369	363.75	601.52	460.083	558.756	562.101	624.314	367.45	306.978	194.099	394.668	329.49	555.654	476.896	664.532	340.304	428.046	349.932	295.674	882.276	494.238	304.509	302.36	745.76	526.261	420.622
1	18	15	46000000000000	CD157598	1190.17	1747.86	1181.73	866.956	1211.66	1827.24	1389.24	2080.45	1546.57	513.728	806.117	863.449	3429.4	2573.08	1107.06	1564.61	1638.17	1149.11	1086.91	671.882	1247.2	1159.72	1409.1	1777.33	633.82	481.437	674.448	104.083	211.286	169.227	2051.96	773.929	1273.09	693.941	909.644	632.907	600.802	1360.4	739.358	633.642	611.557	393.141	506.935	340.498
1	19	15	46I12	CD158708	73.7502	95.7096	209.03	68.6071	382.091	140.852	159.965	350.33	230.879	2046.31	1909.97	2692.55	160.307	313.854	239.483	210.379	242.499	205.42	617.305	246.183	735.504	175.81	329.103	245.354	321.53	297.71	292.468	330.178	352.788	477.524	175.344	242.202	349.633	313.866	101.333	177.521	175.927	341.115	263.518	370.591	237.218	130.568	158.646	49.3477
1	20	15	46M12	CD159859	1619.69	2556.79	1680.94	108.351	367.374	316.61	281.332	253.555	304.23	1000.07	1254.95	1358.73	248.408	267.983	120.402	398.996	445.447	227.954	504.644	237.56	462.623	355.185	478.035	440.037	370.369	210.022	212.259	199.847	268.346	276.054	740.784	308.85	520.331	321.032	218.13	249.662	165.591	307.594	289.78	345.929	244.911	267.266	181.604	126.73
1	21	15	46A24	CD156754	5982.66	7912.16	6514.08	32383	42762.5	60140.8	22198.7	28819.1	22158.6	5612.12	5377.78	6890.92	37451.5	47602.2	35112.4	50645.5	56348.6	36221.4	49435.3	40558	45168.1	47224.5	43139.2	45617.3	39028.9	34684.4	51482.6	10198.5	7910.79	11480.1	40665.7	26507.9	43577.2	15508.5	22086.6	14622.4	24042.2	50579.1	29089.7	14432.8	18423	12529.6	15340.5	17331.5
1	22	15	4.6e+25	CD157771	865.176	1211.55	757.897	93.0248	210.52	247.168	252.168	374.961	237.19	718.622	953.487	1179.79	320.083	352.115	179.751	323.892	272.291	117.714	301.863	180.496	365.959	301.884	387.798	392.376	210.235	156.656	211.09	132.205	207.262	157.888	691.802	261.885	527.487	346.666	508.44	337.984	160.656	345.584	305.961	324.164	265.001	296.901	126.255	121.727
1	23	15	emp	emp	169.717	113.425	41.9139	119.304	242.981	227.802	175.526	187.093	187.361	166.94	96.5137	100.679	41.999	66.9432	67.5846	88.0734	76.3656	104.106	26.1503	20.1335	15.6243	71.8623	43.9125	53.105	70.4625	7.28233	57.4667	34.0459	20.3035	15.9677	74.2489	53.2625	18.4061	87.3736	30.3539	251.935	57.5738	31.2703	53.1178	75.405	31.2289	19.1387	108.862	248.822
1	24	15	46I24	CD158775	104.246	91.1994	260.91	202.527	223.741	209.391	150.707	168.06	105.631	261.347	344.423	119.468	107.723	154.858	223.388	145.808	235.342	38.9647	160.339	130.634	167.477	108.545	283.977	116.225	242.029	142.811	27.8475	220.994	188.808	65.2908	179.281	146.544	145.35	140.756	110.55	84.3642	31.6839	398.989	154.331	111.53	133.439	343.751	48.1245	27.2771
1	25	15	46M24	CD159994	1003.91	1904.49	1081	213.808	458.35	564.769	403.727	903.143	668.484	456.311	539.368	417.831	458.828	581.406	346.737	698.054	841.403	554.144	876.642	488.636	829.556	907.066	969.285	1213.31	460.709	350.321	255.101	147.215	206.524	213.025	2057.53	727.361	1400.33	1229.71	1508.65	1021.04	238.461	522.556	396.996	249.262	288.495	288.159	106.858	119.048
1	26	15	47A12	CD160644	13546.4	20925.3	13494.7	60318.8	71615	83019.9	59563.8	54420.4	49585	10711.3	9472.17	12150.6	33744.3	42603	24458.2	34932.2	40771.6	25573.8	59319.5	51291.3	56412.2	56390.1	49888.6	55470.6	54708.1	52315.4	66531.7	23951.1	16323.9	23666.4	47847	37044.4	61642.9	58443.4	61195.9	50718	61245.1	74127.1	72421.7	40740	48448.4	48307	71055.2	62039.9
1	27	15	47000000000000	CD161673	5172.94	8075.92	8362.24	339.212	598.6	888.721	659.875	1114.63	802.949	1235.63	1383.31	1390.79	856.315	1537.34	635.55	1695.65	1772.41	1543.29	1890.02	991.581	1717.7	1186.95	1300.17	1702.97	1031.48	749.706	492.034	435.704	573.93	572.481	1025.18	618.516	1187.93	547.533	930.032	746.684	328.056	746.155	775.241	687.728	471.905	517.736	325.901	372.074
1	28	15	47I12	CD162738	6083.24	12411.8	6850.21	3563.44	5220.81	6936.25	5279.27	8776.36	6239.8	4138.7	5268.09	5792.11	3970.01	5759.35	2992.17	8758.87	9446.3	6431.99	6014.44	3144.38	7221.67	5864.25	5558.27	8366.64	4057.38	2680.81	2729.61	912.263	1409.42	1107.03	5579.78	2804.32	4347.22	3194.49	3920.75	2977.03	1523.3	3636.39	3001.68	2241.03	2352.94	2348.08	1094.63	1184.51
1	1	16	40M24	CD133014	525.145	671.439	617.489	278.086	629.146	454.991	655.488	618.465	374.703	1784.1	2930.73	2117.8	1045.49	360.648	276.553	921.233	786.661	571.202	701.452	377.488	923.927	854.679	1112.58	1317.21	803.605	694.257	632.42	768.726	588.826	603.359	2548.45	1309.98	1305.97	1095.34	920.795	916.472	759.662	1165.65	986.526	420.398	432.466	647.668	205.419	168.554
1	2	16	41A12	CD133548	32961.3	31984.2	45965.1	2000.84	3114.2	4816.65	20631.5	19268.6	14083.2	4162.58	6091.37	4311.36	11284.4	7489.5	4460.3	11148.3	10208.4	12014.2	4859.3	5269.51	7356.49	8896.21	8520.34	10494.9	6439.97	4915.04	3868.37	1782.26	1554.91	1311.49	9954.46	3362.46	8938.39	2488.4	3362.34	2600.32	7351.59	10532	7493.54	1086.71	1464.66	1889.18	1912.75	2079.61
1	3	16	41000000000000	CD134371	1074.88	1471.13	1613.85	325.986	719.012	483.456	1595.16	1430.56	1008.93	254.644	270.03	206.284	1164.79	442.255	289.065	1880.13	1706.21	1160.76	428.727	382.397	742.563	1123.01	1251.07	1589.54	714.219	476.814	409.648	200.471	205.943	230.083	1884.86	1176.17	1022.15	862.961	1008.42	905.832	325.58	731.487	530.861	177.618	208.796	265.722	289.874	238.259
1	4	16	41I12	CD135414	6010.23	7958.3	7168.21	3980.57	6135.44	8292.03	9482.12	11511.9	8929.17	5408.65	6127.45	6397.55	11515.2	3974.76	2445.94	18409	17677.8	13982.4	14928.3	11146.4	17753.1	19503.5	18835.9	24503	23159.8	17348.7	16891.3	27581	24445.7	33972.8	40402.5	23107.6	39466.6	34702.9	39348.2	27861.6	20212.1	29530.1	20834.9	17694.7	19928.2	15180.5	4415.25	4685.05
1	5	16	emp	emp	147.14	44.5826	106.951	92.1122	88.9249	243.229	30.9745	32.2044	118.355	127.788	71.9199	41.7187	142.949	51.9088	199.447	204.601	115.057	58.6498	27.8324	121.27	66.1527	111.315	49.8746	29.7236	40.3647	91.8612	126.992	123.734	136.357	70.6642	161.188	24.3679	24.126	120.24	5.89816	161.694	46.5105	44.1506	86.1422	112.132	11.0013	31.864	190.513	144.921
1	6	16	41M12	CD136310	493.037	318.495	561.652	172.424	276.061	227.158	175.091	317.139	185.039	4100.28	4569.38	3884.76	340.356	383.218	345.99	835.17	858.367	421.249	478.496	284.656	672.021	199.882	353.357	418.699	990.705	700.012	392.27	549.823	666.929	698.514	381.181	196.012	342.948	604.122	441.522	483.174	274.616	656.866	546.212	494.515	379.526	550.413	191.263	140.323
1	7	16	95000000000000	mCD038508	120.124	184.922	189.969	201.317	171.776	144.688	184.734	98.6091	85.8195	47.827	349.615	65.4927	183.22	74.6934	209.509	195.675	117.503	134.724	50.6094	120.718	83.2604	98.9937	166.134	54.5274	166.504	275.496	96.8846	309.724	287.922	93.1641	58.8117	77.7665	59.0386	163.922	34.4238	60.3967	65.2081	267.885	178.713	84.0269	175.636	105.394	209.303	122.952
1	8	16	41A24	CD133634	3730.09	3873.04	4629	68.888	133.757	91.2498	139.649	140.004	174.25	214.739	263.953	248.582	155.603	150.653	114.28	556.179	290.72	259.974	195.79	116.537	179.118	211.355	235.773	266.532	242.396	104.543	127.695	121.541	122.851	125.222	659.792	261.981	318.509	3490.17	4725.99	3797.44	6322.53	11331.2	6337.29	191.912	200.231	141.357	11137.8	9880.16
1	9	16	4.1e+25	CD134459	631.216	580.879	579.544	106.088	289.532	131.154	228.377	353.055	282.732	1603.05	2268.16	2083.42	667.918	308.607	201.793	579.62	720.353	319.515	427.284	283.537	657.308	527.46	523.744	701.741	512.548	357.944	324.346	286.83	261.297	276.54	791.091	411.376	524.238	415.807	306.374	700.657	284.931	760.168	473.02	332.039	280.413	296.959	187.807	140.666
1	10	16	41I24	CD135526	3095.06	4470.05	3815.75	3312.72	4160.48	5669.28	8004.12	8548.06	7860.52	1279.18	1285.67	1507.15	20756.8	9906.16	3721.19	12659.4	13059.1	9554.51	12254.7	8297.29	15991.4	12021.5	13977.5	19241.1	11032.9	8910.83	12464.5	3580.83	2390.33	4005.7	29906.8	14257	18116.7	2422.13	3694.65	2851.45	3500.96	7670.34	3911.83	5527.25	4627.47	1713.72	7208.37	6110.38
1	11	16	41M24	CD136410	615.289	794.35	746.044	473.196	800.824	725.871	621.217	1446.43	927.956	1326.76	2211.67	1572.25	579.505	1130.75	745.082	1129.51	663.236	470.7	898.102	803.898	584.184	598.09	675.797	537.545	1651.58	799.983	508.06	534.469	878.759	581.027	802.592	681.589	1174.95	991.777	1029.18	765.389	866.074	1851.87	1406.34	506.555	502.052	1787.53	1226.98	990.846
1	12	16	42A12	CD137436	423.109	353.49	450.553	238.52	395.151	420.361	258.456	613.848	394.906	693.717	712.883	685.189	268.437	389.99	337.157	632.354	406.627	299.906	366.231	4610.41	630.437	398.789	394.216	416.768	741.944	475.38	351.073	194.754	514.414	445.626	250.588	425.28	375.149	406.649	344.262	335.987	339.261	752.942	518.828	496.705	417.822	689.249	212.403	180.98
1	13	16	42000000000000	CD138456	1666.08	1590.18	2408.52	1311.74	1755.86	2206.13	2194.3	3051.09	2884.77	2374.55	3066.26	2526.76	2026.65	2251.72	1173.24	2759.27	2726.92	1915.64	3200.91	1551.68	4845.37	1975.11	2376.64	3065.93	5046.28	3015.72	2860.04	2067.78	3039.2	2826.76	2457.54	2135.63	3107.43	2247.52	2440.99	1926.1	2286.25	4387.5	3843.66	4640.03	3314.98	3946.12	2847.09	3034.63
1	14	16	42I12	CD139726	183.536	307.776	209.332	360.57	450.579	248.137	814.227	801.306	569.651	414.335	550.645	470.864	632.004	394.732	195.838	958.436	1627.59	763.978	2035.19	1165.7	2640.96	2478.71	2155.28	3120.74	196.189	217.526	164.446	232.352	185.304	206.129	1961.02	862.207	1033.36	464.801	785.843	669.262	132.84	430.668	159.946	334.707	471.555	221.752	135.541	154.08
1	15	16	42M12	CD140660	18.2838	210.681	136.434	163.276	275.788	198.533	114.929	57.5315	232.13	323.068	319.158	444.042	134.99	81.0097	353.061	217.219	215.407	116.341	132.797	42.8744	139.735	186.278	93.1844	41.907	77.4838	124.576	44.5189	255.148	139.451	361.373	254.75	154.216	13.7848	116.407	134.359	102.458	322.109	148.273	284.223	135.777	191.148	319.951	309.515	298.28
1	16	16	42A24	CD137644	27.6523	20.9112	160.03	108.44	216.229	211.337	31.2105	25.4262	66.3249	307.018	397.47	79.0772	79.8326	57.2563	174.841	360.11	372.179	263.425	93.2104	37.0354	76.0531	76.7249	110.608	80.654	7.64564	105.69	79.2859	184.174	318.829	311.882	29.6014	57.7271	13.7163	137.056	30.0893	94.5458	37.3422	41.4608	64.5283	335.862	146.135	78.1251	99.8138	487.118
1	17	16	4.2e+25	CD138525	5839.21	8326.81	7366.45	9990.8	13863.2	18993.2	22057.7	22405.4	19662	7154.98	6570	9611.97	19470.6	11176.1	7127.83	12953.1	12285.4	8614.03	17345.7	15327.1	18345	25243.8	22001.6	25557	16050.6	11846	18972.7	16794.1	14334	21368.1	47647.2	29329.1	49938.6	17961.3	26504.6	16186.5	27930.3	48295.6	25804.2	19712.5	28786.6	28710.9	26367	27498.3
1	18	16	42I24	CD139793	113.103	123.734	236.435	106.998	171.377	168.434	209.838	139.686	175.572	706.074	579.211	661.174	135.235	118.023	161.585	191.191	165.215	80.3956	230.02	56.0519	273.194	161.922	143.526	118.827	280.073	269.584	84.7796	236.527	264.871	340.698	220.246	58.5128	129.893	216.115	41.3516	311.182	143.287	559.416	269.812	235.468	266.831	293.387	264.566	78.2222
1	19	16	42M24	CD140782	3035.06	4816.87	3700.31	1116.58	1236.2	2371.69	937.645	2267.53	1553.62	2980.96	4209.67	4102.2	1419.04	1861.19	1149.55	2211.55	1813.82	1548.58	2469.3	1312.98	2374.12	1925.71	2137.39	2550.81	2453.32	1315.82	993.273	489.42	1225.6	841.243	1828.32	1171.22	2046.57	1494.53	2026.77	1388.12	645.565	1371.41	1408.43	985.168	866.906	2352.5	615.598	482.39
1	20	16	43A12	CD141808	19485.2	25730.3	21652.3	53865.4	52437.8	85864.7	47803.9	48900.2	43708.6	12783.1	14243.7	17697.1	38932.5	45846.7	33204.3	61320.5	56131.1	45644.7	57078.8	53017.8	45579.1	51001.2	45170.3	58163.7	48150.6	47528.3	65078.5	30261	26006.3	31009.2	45163.3	37607.7	67031.5	73703.7	67777.8	56692.8	43361.8	65637.5	43946.9	39525.6	53241.9	38933.8	58310.3	55046.8
1	21	16	43000000000000	CD144026	7025.52	10554.3	7901.36	1005.37	1081.64	1854.78	542.842	1031.82	736.961	4887.71	5893.27	6785.01	951.697	941.167	469.546	1883.65	1733.7	1206.96	886.673	435.729	1003.96	817.135	979.857	1096.7	1357.02	855.307	607.127	426.379	925.215	789.662	602.181	359.275	613.262	404.555	532.348	557.236	426.464	721.095	528.72	537.946	536.729	778.317	328.44	246.858
1	22	16	43I12	CD145344	43239.2	58422.4	55975.7	3615.22	4515.25	5770.64	5755.65	11767.7	8193.58	3140.62	5046.36	6002.42	16085.8	13976.6	6187.13	16896.5	19331.3	13594.1	13327	10016.1	16131	17859.8	17614.9	21308.2	5177.66	5106.61	5662.9	3817.49	3146.88	5204.47	13158.2	8382.75	12840.8	5339.7	8310.72	5472.7	2885.55	5168.74	2570.59	3943.23	5503	2755.54	3547.53	4788.17
1	23	16	43M12	CD146495	3147.49	5971.5	4421.54	9148.84	10673.4	17834.5	16311.7	22858.5	17188.5	5282.23	6785.04	7132.03	13138.6	14408.3	6890.93	19584.3	19255.9	14385.2	23058.1	14158.8	23191.8	25016.6	22694.9	31784.4	12839.8	9505.04	13127.6	3899.84	4061.09	4497.41	34635.3	15589.7	28280.1	7938.29	10410.9	7937.84	7154.22	16962.3	10598	6185.07	7491.51	6689.24	9778.78	11876.9
1	24	16	43A24	CD142086	19834.4	30513.3	21891.5	51805.7	68945.5	85287.3	64261.8	53200.8	48796.1	11333.6	9998.95	11922.5	38983.5	55021	40060.1	58333.8	57939.5	39468.1	62469.2	59549.6	51728.2	49948.6	51963.4	60325	38623.1	37376.1	58840.7	25913.6	18371.8	25519.4	51371.1	40260.6	65324.6	77240.3	69209.9	62818	20868.6	44733.4	24708.9	53517.7	59822.3	30811	65562.3	60109.6
1	25	16	4.3e+25	CD144211	289.687	502.578	358.159	560.899	1139.4	964.358	886.564	1211.06	703.458	645.112	707.691	485.172	1452.14	1716.32	802.083	7271.09	11267.4	6064.67	1071.57	581.376	1293.15	1046.04	1160.66	1063.43	954.327	958.349	1160.04	404.24	555.152	509.823	2797.95	1119.99	2361.99	1702.72	1671.76	1633.11	2096.23	4033.94	2454.26	1472.2	1064.19	1029.56	875.806	1007.87
1	26	16	43I24	CD145466	1954.59	3294.25	1952.17	4030.67	5623.6	8989.79	7118.82	10827.1	7038.66	2712.33	3267.77	4159.75	3409.37	3412.92	2536.2	4300.58	5175.8	3258.76	9058.24	5817.79	9304.35	11442	9408.8	14223.1	3424.23	2798.47	3773.51	2050.88	1503.91	2170.81	22488.6	8678.54	20242.4	10384.3	12810.7	8707.75	8190.52	18670.1	10372	4446.34	7658.86	5050.75	3478.51	5501.28
1	27	16	43M24	CD146652	5105.74	10337.9	5444.52	95.6478	128.851	139.864	185.743	252.339	221.748	201.447	229.905	243.581	816.748	1203.3	555.086	731.415	761.345	477.13	374.62	169.872	281.742	236.939	301.772	329.291	182.762	434.865	80.3711	77.9184	96.1935	95.9825	112.973	65.8738	138.503	168.197	134.96	144.808	93.1923	163.704	177.932	125.592	99.7306	121.256	63.2587	79.4881
1	28	16	44A12	CD147256	1004.45	1665.02	962.623	113.267	309.99	281.714	229.094	365.337	267.036	1138.72	1114.39	1363.52	273.014	371.163	279.901	563.785	609.215	366.194	568.681	291.994	685.411	500.101	487.09	686.36	392.198	504.251	293.667	339.032	473.65	503.875	2968.28	1257.09	1806.56	947.831	868.834	773.102	325.41	732.528	399.658	501.954	468.803	406.142	208.775	247.568
1	1	17	37A24	CD120409	579.594	839.034	812.402	135.221	211.35	269.376	211.611	461.493	323.861	680.821	795.851	535.392	601.768	304.354	221.75	876.275	508.193	478.893	681.933	330.049	989.637	379.083	514.034	506.197	960.599	606.506	388.142	412.18	616.062	565.611	574.776	379.265	555.167	678.499	610.052	633.447	236.337	750.358	415.736	399.352	467.502	837.995	269.419	154.618
1	2	17	3.7e+25	CD121300	600.57	942.371	792.947	1228.93	1403.94	1752.72	2221.86	2511.33	1512.76	364.887	523.025	371.094	3021.55	966.864	498.046	2885.61	2832.71	1644.23	1137.53	931.104	1990.67	3405.34	3715.66	4683.96	1647.43	1321.71	1373.45	353.07	239.144	203.189	10225.7	4794.12	5435.25	5740.9	7175.43	5958.05	4639.28	7280.35	3896.38	1476.92	1408.15	1182.04	252.668	295.221
1	3	17	37I24	CD122279	42.2812	105.057	34.1534	132.191	226.771	41.5562	124.441	71.1722	58.1081	793.534	1103.58	603.065	23.4818	90.6823	189.841	94.565	60.3081	98.0754	21.9952	99.5324	40.8572	27.6914	85.1876	32.0239	90.5407	156.446	96.1123	184.594	297.325	169.74	24.153	92.913	60.7629	128.628	39.7846	136.789	112.112	197.461	62.8277	100.902	77.1792	195.779	117.025	121.534
1	4	17	37M24	CD123281	10896.4	17771.8	14121.7	51831.6	64615.9	90690.1	65283.9	76915.3	60435.3	25581	27887.4	30733.2	3167.54	959.814	575.159	2824.08	2638.84	1996.68	1406.78	853.707	2038.91	1248.7	1672.57	1955.48	1229.78	896.719	761.725	1036.67	813.222	1117.18	2354.49	1167.27	1849.25	921.978	1032.62	1029.88	576.827	1133.67	703.944	500.753	448.966	340.929	404.107	309.209
1	5	17	38A12	CD123992	211.965	273.57	308.936	188.039	288.839	243.98	126.753	369.089	232.404	1471.56	1827.8	1307.01	300.383	274.394	314.466	456.763	425.127	283.344	423.82	406.997	419.245	192.122	295.206	243.498	495.295	368.996	362.872	234.21	256.826	299.972	379.9	368.856	303.534	506.17	210.977	310.916	464.907	759.948	440.3	238.746	232.171	477.897	224.715	262.946
1	6	17	38000000000000	CD124748	763.838	964.971	1038.44	278.821	456.358	367.78	331.743	759.83	605.934	450.012	481.169	269.447	352.245	405.955	311.05	661.039	428.779	332.907	484.02	291.682	329.849	391.755	480.389	444.874	671.979	397.009	291.028	182.096	256.741	267.551	384.328	492.769	571.65	485.067	283.383	256.921	339.563	537.54	480.69	180.245	223.371	744.762	340.887	178.636
1	7	17	38I12	CD125513	2195.93	2565.05	2594.65	487.077	829.666	690.622	994.932	1719.56	1242.08	2621.65	3819.7	3273.99	2019.4	1108.11	802.217	3847.54	3139.33	2267.61	2447.27	1454.99	2646.54	2645.05	2999.23	3821.58	2434	1485.71	1350.27	746.056	833.234	939.604	2644.77	1400.87	2196.13	3472.1	4178.87	3673.86	900.559	1935.68	1435.03	1084.22	1049.6	1539.66	719.714	723.022
1	8	17	38M12	CD126242	671.488	854.324	846.682	141.853	246.581	113.841	354.828	317.206	351.312	400.417	611.228	426.72	555.177	294.184	178.262	734.099	661.577	459.428	321.921	123.496	318.836	310.744	341.683	467.197	242.271	252.391	207.184	111.955	95.9554	122.421	439.044	270.034	307.297	333.158	197.769	313.731	209.378	370.627	331.195	179.746	196.073	214.014	216.059	152.846
1	9	17	38A24	CD124039	18.9985	5.90628	49.0582	50.0622	130.242	35.7958	62.1969	43.216	42.2789	438.838	394.75	379.847	43.8907	49.2974	123.766	96.6774	118.563	100.741	10.2858	60.7844	18.2605	41.2002	137.032	13.3079	117.389	14.4486	128.186	316.723	244.264	180.272	54.3813	17.3489	22.7871	183.384	3.62422	1564.4	68.7731	45.0001	85.0356	115.068	40.2368	42.8414	26.3435	508.557
1	10	17	3.8e+25	CD124850	1167.06	989.985	1664.72	574.158	890.722	1011.41	1206.7	1809.96	1479.29	2980.15	3146.18	3176.18	1423.59	1157.58	790.268	1896.03	1683.83	1087.13	1737.97	828.571	2367.25	923.61	1219.92	1697.57	2692.52	1770.25	1595.93	1328.06	2250.4	2176.83	1617.2	1178.83	1901.3	1595.59	1442.13	1198.76	1365.94	3137.15	2483.61	1697.91	1516.2	2978.51	955.137	1187.97
1	11	17	38I24	CD125648	126.895	178.596	190.358	139.839	202.043	236.614	230.087	455.758	211.728	162.776	169.046	200.833	199.546	317.414	214.349	361.045	207.692	148.376	392.594	536.445	119.351	155.785	253.415	236.227	264.683	114.776	83.1987	125.29	323.855	131.812	344.709	246.837	322.882	186.926	86.048	192.348	339.074	365.161	338.051	243.85	268.192	539.888	95.2273	142.129
1	12	17	38M24	CD126516	8151.86	8350.68	11251.1	660.921	657.695	1387.5	2061.44	2660.92	2349.02	1731.59	2255.93	2177.7	2093.69	1683.81	718.647	2732.91	2508.62	1780.13	1511.69	1155.96	2203.78	1580.86	1667.35	2242.19	1398.37	959.324	705.128	442.577	787.357	816.665	1865.09	1148.95	1762.26	859.464	1171.15	955.189	563.37	1243.52	838.122	737.869	625.853	1034.09	470.257	376.47
1	13	17	39A12	CD127413	1571.9	2086.65	1943.93	223.772	381.794	244.169	385.653	634.942	609.414	2249.18	2803.18	3708.63	551.377	396.283	381.749	833.001	563.5	415.324	566.982	404.197	699.837	599.916	574.099	785.125	645.165	457.669	382.723	311.688	536.549	506.848	581.54	389.957	704.514	695.672	454.452	539.987	409.406	843.755	719.813	433.623	544.458	659.875	255.087	339.851
1	14	17	emp	emp	75.1919	73.6611	187.974	66.8936	208.953	115.314	127.654	99.5022	134.85	48.3547	183.593	53.4528	92.3954	114.344	97.6189	54.0887	100.255	18.0703	53.0254	154.508	110.069	49.8374	160.278	201.766	79.605	77.1061	83.1639	178.484	229.377	205.726	52.5302	86.5103	49.5681	115.044	42.7715	126.971	160.592	77.7508	59.6782	117.485	319.049	137.455	16.2693	462.871
1	15	17	39000000000000	CD128430	724.798	926.45	808.559	65.5254	135.498	111.833	108.005	106.394	71.6093	96.4848	87.8353	79.3799	103.064	118.967	99.504	243.489	162.466	112.73	104.707	106.834	116.276	83.521	79.8127	142.402	86.7973	89.7978	124.436	90.4451	109.43	77.6148	128.604	58.6948	115.5	214.264	144.572	134.134	121.133	86.6308	142.45	123.274	149.641	105.703	57.0725	92.0957
1	16	17	39I12	CD129419	1363.64	1668.74	1389.74	344.928	500.091	774.736	698.22	827.301	805.728	390.477	543.608	593.736	2479.32	1818.62	936.807	1604.22	1734.33	1033.3	848.421	608.223	1199.43	1162.53	1385.86	1464.36	398.949	316.145	377.856	205.217	251.563	258.734	1538.66	755.97	1091.34	523.412	877.645	541.39	483.619	867.104	734.822	334.426	398.223	486.867	374.098	407.088
1	17	17	39M12	CD130232	76766.3	78125.9	87737.4	2598.63	3084.81	4336.17	6288.1	10720.4	7572.91	3992.55	5232.92	5479.81	17897.3	11658.2	4709.11	15873.7	22792.1	16456.8	10025.1	8561.24	15399.6	17893.7	16632.3	20563.2	5960.72	6143.62	5333.05	2820.81	2833.43	3693.3	10226.2	6297.25	9479.07	3491.36	6498.24	4111.7	4206.73	6006.11	2866.08	5328.05	3958.51	2598.94	2520.27	3402.65
1	18	17	39A24	CD127534	3002.08	4943.86	3367.07	707.552	1008.71	1387.94	729.746	946.372	822.595	1275.1	1609.56	1738.24	3144.16	2270.43	967.287	3138	3079.77	1931.29	1020.91	754.265	1155.31	1137.34	1068.37	1541.94	678.26	461.715	562.593	353.377	404.025	544.06	2429.3	839.588	1741.02	2055.61	3210.82	2222.99	668.444	1412.99	1093.16	1567.6	1783.59	684.51	1035.88	1162.23
1	19	17	3.9e+25	CD128617	663.32	1097.69	808.809	165.634	244.448	197.878	318.465	542.093	508.521	909.271	1300.34	1630.5	1748.57	1300.64	676.357	1116.79	1352.45	909.535	1841.98	1224.25	2377.96	2694.52	2763.34	3510.02	1426.98	1244.78	1714.63	1032.61	892.092	1272.28	25703.1	10691.6	20108.5	18102.7	26336.3	18215.7	27918.8	52554	33093.3	28230.1	34427.7	18115.8	3515.07	3692.69
1	20	17	39I24	CD129491	1367.99	1973.95	1286.5	5145.61	6699.88	9935.64	6350.27	8612.58	6572.07	564.39	533.794	576.603	10616	9179.06	4852.78	9584.39	11141.2	6044.88	10475.6	7860.33	12421.3	14197.3	12943.7	17150.9	3318	3575.02	4970.55	1054.99	860.498	1220.73	18458.3	7493.99	13919.9	4947.95	6249.43	4732.17	4880.55	10551.7	5772.6	10269.7	12441.1	4577.55	1964.92	2254.24
1	21	17	39M24	CD130287	167.105	191.798	262.143	104.2	408.745	172.773	253.49	213.498	189.864	2783.84	2309.99	3053.38	165.349	171.972	208.47	271.037	354.338	199.56	526.334	165.692	527.418	197.249	351.755	319.12	342.423	329.846	460.533	275.19	477.703	244.538	297.741	193.281	208.439	509.484	280.547	264.591	115.144	409.598	535.994	551.571	281.136	309.164	186.465	90.8655
1	22	17	40A12	CD130970	1717.18	2669.22	2318.88	478.019	740.021	944.254	662.149	1106.43	802.261	1186.52	1439.55	1401.71	823.803	903.16	442.572	1317.44	1302.12	1016.87	1262.85	600.453	1393.07	788.007	942.41	1225.45	1330.74	776.873	891.291	641.739	950.887	964.369	1526.98	874.064	1453.83	813.213	705.939	687.016	803.05	1967.23	1683.88	787.441	823.077	1180.26	1004.02	1045.55
1	23	17	40000000000000	CD131541	6187.72	10476.6	7496.03	196.981	359.773	303.872	322.737	599.259	466.159	471.745	634.641	580.574	379.359	569.17	291.343	814.213	780.093	624.058	846.272	343.503	747.262	518.504	573.47	724.265	680.221	317.293	281.018	179.505	382.603	396.129	390.9	307.964	461.77	317.523	305.729	300.747	308.929	577.551	601.807	438.067	348.006	627.287	225.876	195.947
1	24	17	40I12	CD132178	1280.15	2759.11	1902.83	398.086	591.405	769.087	611.773	1049.55	910.224	2180.3	2661.44	2485.46	636.423	980.045	494.904	1370.2	1468.52	1072.91	1783.82	565.045	1869.19	853.939	873.056	1297.68	2062.86	1269.02	1104.83	630.83	1348.01	1241.62	807.834	769.967	1195.44	1109.01	881.365	954.135	736.056	1516.05	1460.06	1196.93	1130.9	1819.14	618.124	691.924
1	25	17	40M12	CD132935	157.664	117.737	161.701	106.119	89.444	57.4051	97.7721	93.3161	116.659	1107.87	1495.66	1540.37	48.5209	92.1194	133.088	80.8527	135.252	83.0981	145.066	59.3825	116.779	86.7715	116.479	22.7102	132.443	77.9742	39.9535	58.8575	47.4413	99.6792	159.584	142.528	66.6801	121.976	23.3422	218.92	166.392	125.647	256.072	117.973	78.948	85.6237	46.2104	65.5449
1	26	17	40A24	CD131053	2959.86	3871.94	3686.86	1576.3	1792.5	1772.68	1437.94	3751.75	2323.64	2096.09	2618.82	2325.41	1474.97	2385.89	1634.36	12094	10868.3	7417.61	3270.42	1383.83	3041.8	1512.96	1647.12	2068.71	5038.78	2731.59	2072.09	1357.65	2716.85	2250.19	1816.85	2228.45	2979.09	2334.87	2115.31	2150.28	1652.31	3819.63	4224.5	2104.72	2131.75	5989.73	1295.51	1190.91
1	27	17	4e+25	CD131583	1279.12	2475.98	1650.83	384.712	495.859	661.403	318.623	1068.39	579.492	8394.12	10224.4	10848.2	761.243	1076.52	710.763	1217.55	917.45	809.382	972.098	459.317	725.843	697.416	761.621	967.607	867.16	580.942	271.223	248.42	491.331	341.626	652.454	424.658	664.862	545.143	561.002	453.32	224.53	463.46	640.738	333.443	400.967	968.218	269.369	190.526
1	28	17	40I24	CD132222	856.922	2081.24	945.122	176.598	299.341	343.976	269.042	427.834	328.223	708.95	845.19	1079.43	283.809	383.048	277.777	860.287	910.324	553.856	734.115	331.267	772.664	562.585	593.689	781.665	612.474	668.784	361.992	203.211	257.591	284.827	726.322	300.164	588.918	482.027	490.832	472.217	246.67	531.356	369.73	396.128	311.568	483.6	200.629	233.896
1	1	18	34000000000000	CD097797	743.83	962.439	958.739	92.8899	99.6202	171.559	258.771	338.088	217.719	261.945	267.836	255.253	601.92	246.486	207.384	1391.87	1053.84	844.654	724.334	578.904	1034	483.339	647.506	715.457	327.581	285.849	198.987	141.507	131.593	189.424	425.476	188.565	239.663	336.812	186.607	227.369	145.827	251.993	188.865	74.2103	136.729	178.881	104.676	76.1739
1	2	18	9.4e+25	mCD036984	372.591	392.196	577.972	183.759	309.039	569.593	286.501	420.317	260.846	605.823	673.33	376.08	616.096	387.626	323.817	804.234	590.178	657.539	834.809	493.253	1287.5	241.144	576.88	572.706	1217.18	808.941	716.517	914.554	919.903	877.851	830.127	522.619	857.538	792.125	478.685	521.911	686.992	1154.31	766.257	855.338	592.02	479.278	285.107	282.919
1	3	18	34I12	CD110822	573.453	644.232	617.106	658.823	656.487	708.323	1192.81	1115.35	726.03	146.923	179.949	127.989	11394.7	2927.08	1633.66	8700.86	9020.89	5530.43	4773.11	4007.37	7917.47	6896.85	6857.23	9462.09	2391.3	2282.71	2211.39	835.061	742.136	779.424	5278.44	2629.17	2461.48	1223.07	883.664	1127.66	890.211	1122.31	814.018	605.675	604.462	343.675	160.36	142.872
1	4	18	34M12	CD111704	2562.6	3223.43	3291.18	814.494	1225.01	1515.02	2941.61	3081.31	1996.14	1272.13	1445.38	1194.38	11756.1	3456.82	1818.6	10680	9369.36	6606.83	6050.64	5085.85	9751.9	7347.46	7274.12	9971.1	2137.15	1403.62	1597.44	2309.72	1740.21	2541.03	8958.39	4394.98	5485.09	2129.82	2665.86	2262.66	966.192	1558.11	1194.23	957.73	1121.69	1214.46	946.814	849.763
1	5	18	34A24	CD097012	1180.34	1812.42	1416.18	743.565	954.907	901.473	1023.47	1546.79	1122.84	1090.74	1276.91	993.905	1359.28	1180.29	885.581	2032.05	2223.17	1248.33	1558.72	956.525	1556.08	1081.5	1010.16	1204.2	1866.42	1663.39	1429.81	876.496	993.977	904.773	1944.58	1618.94	1270.71	1485.91	1088.31	1159.44	1402.31	2565.49	2006.55	833.209	734.357	2301.82	583.06	714.492
1	6	18	3.4e+25	CD097937	929.428	1451.59	1477.22	939.249	1178.43	1664.32	2011.28	2404.89	1904.58	2792.52	3755.66	2733.08	2349.19	1358.57	824.508	3410.07	2419.14	1967.85	2807.58	1787.69	3503.77	2010.97	2325.66	3154.58	3767.91	2024.01	1731.79	1264.93	1706.46	1817.27	4234.7	2255.15	3122.58	5470.87	7063.1	6403.26	1285.07	2745.68	2003.95	1733.91	1825.35	2184.18	913.968	807.227
1	7	18	34I24	CD110908	1084.27	1820.67	1535.55	561.107	808.946	1075.33	1502.41	1937.86	1376.12	280.55	317.495	191.02	3602.84	1156.46	531.417	3111.16	2752.51	2009.21	2403.06	1698.08	3830.93	1784.99	2468.41	2997.84	1048.57	667.6	590.073	861.093	845.137	1099.29	3916.76	1882.92	2541.03	3408.36	3935.28	3376.87	663.281	1108.17	778.225	1018.39	937.331	636.516	523.771	529.797
1	8	18	34M24	CD111789	2960.42	4338.35	4128.04	674.856	965.329	1160.09	2607.85	3128.59	2506.19	3664.36	4356.02	3753.76	723.162	729.042	386.696	1244.22	922.457	767.373	822.945	337.184	807.297	528.813	853.716	971.227	1369.55	737.344	475.075	362.601	633.858	462.506	605.92	429.582	688.146	494.141	447.116	499.607	444.882	817.042	610.595	372.284	323.066	1137.51	282.532	212.191
1	9	18	35A12	CD112738	998.774	609.09	1045.1	327.342	746.176	590.604	584.409	1001.95	730.659	1635.1	1883.28	1825.56	753.475	685.447	488.765	1264.4	1273.93	980.612	1074.57	633.88	1721.29	639.901	734.947	1041	2015.77	1350.14	1088.71	1324.66	1701.24	1722.17	963.006	609.497	911.505	1060.84	858.452	832.894	797.165	1528.66	1342.84	1260.51	1163.4	1785.59	488.552	476.679
1	10	18	35000000000000	CD114038	5891.13	7717.81	7494.4	27820.6	33545.7	52652.5	53797.1	52270.7	48330.8	4472.29	4036.66	4049.63	37837.7	23714.6	9444.85	29910.6	28091.3	19204.2	47482.6	38087.9	52479.4	42142.5	41001.4	47983.4	17630.5	15544.1	22226	4003.08	3108.16	4439.73	48397.4	33165.6	41372.1	38410.2	55750.1	45161.5	23176.7	42129.6	26880.8	44975.9	36886.1	10591.7	29327.7	27674.7
1	11	18	35I12	CD115026	765.041	1132.01	800.178	769.299	1100.2	1307.78	1056.06	1736.66	1208.77	571.04	779.495	771.297	4022.27	2319.76	1228.18	2896.23	2421.64	1426.13	1646.96	1202.65	1642.63	2523.99	2637.92	3478.75	1147.27	692.147	696.499	381.228	582.19	407.07	3426.79	1447.53	2253.54	1333.26	1440.29	1282.81	737.822	1497.89	1193.58	1081.16	1222.07	1067.18	393.559	291.952
1	12	18	35M12	CD116007	1280.79	1681.25	1486.35	180.685	291.246	561.129	293.861	535.067	397.728	1906.58	2657.43	2411.89	681.522	389.502	263.049	752.038	611.617	470.74	656.496	2730.11	600.184	292.171	469.996	554.056	767.399	453.161	291.165	180.618	245.944	245.064	580.98	261.303	368.466	245.61	282.54	196.763	304.294	450.947	494.741	236.292	252.542	500.902	235.114	158.528
1	13	18	35A24	CD112858	267.866	223.531	347.61	211.65	360.522	326.928	276.857	557.12	407.07	2432.54	2209.48	2664.16	245.491	345.794	325.554	523.057	440.498	250.599	551.688	229.141	352.896	278.788	339.309	428.015	674.032	229.432	220.311	339.951	409.907	390	445.057	384.176	540.311	845.947	256.491	384.814	275.343	728.244	606.429	281.914	473.585	788.331	188.887	101.56
1	14	18	3.5e+25	CD114143	5684.59	10187.1	8397.96	2924.35	2955.01	3972.64	4480.07	8845.81	7990.08	1978.59	2222.98	2370.38	4972.08	4664.79	2846.18	5493.67	3771.62	3053.03	3642.77	1474.56	2934.24	3317.61	3835.16	5346.17	5179.99	3128.34	2145.73	1344.98	2151.82	1898.57	5836.3	5649.28	6445.33	2149.5	2451.53	2171.6	2341.6	6260.47	4715.08	1578.97	1494.45	7155.9	2320.23	2329.04
1	15	18	35I24	CD115169	640.547	940.505	925.699	118.391	238.616	265.888	150.843	319.137	174.247	2555.75	3792.65	3925.56	272.989	300.427	209.27	402.19	332.173	230.018	303.773	242.342	263.559	195.405	242.648	225.258	451.882	218.675	156.556	102.335	270.611	169.944	220.359	122.152	233.101	256.118	217.236	211.892	198.947	193.514	368.793	164.043	210.722	335.368	139.467	100.623
1	16	18	35M24	CD116140	3491.26	5213.1	4257.05	742.77	918.112	1406.3	998.638	1516.28	1305.63	1147.41	1864.17	1782.09	1620.68	1053.59	610.962	2332.08	2274.36	1582.22	4014.83	2437.49	4838.93	3694.22	3860.48	5369.28	1512.73	996.908	1379.83	368.704	542.149	482.702	4342.52	2050.94	3492.31	4071.65	5430.92	4056.81	890.146	1703.32	1309.56	1516.17	1527.67	1099.8	491.904	517.625
1	17	18	36A12	CD116860	2801.56	4332.35	4812.26	2212.52	2871.34	3976.1	2313.26	5156.13	3937.96	10435.4	13769.9	11377.9	3408.25	4657.3	2525.52	5048.01	3793.78	3215.68	4526.06	1939.98	3683.18	2543.09	3174.09	3526.27	6356.7	3815.08	2850.85	1925.3	3843.1	3030.03	3479.72	3494.5	5384.88	2707.18	2912.62	2513.62	2306.4	5286.24	4305.59	3394.49	2765.58	8093.76	1948.12	1840.86
1	18	18	36000000000000	CD117497	3530.18	5245.33	4100.24	2576.88	3220.13	5262.22	1293.81	1663.36	1214.08	771.101	755.452	1073.66	824.69	690.272	319.254	1430.18	1275.65	870.466	823.742	625.446	1050.58	1245.53	1291.56	1566.94	637.47	524.772	768.398	142.56	161.276	179.822	1994.29	933.243	1244.67	661.666	904.783	680.866	1404.54	3070.52	2071.57	246.354	210.563	208.428	1589.68	1615.22
1	19	18	36I12	CD118242	901.454	1249.29	740.062	269.395	369.369	287.956	509.473	723.736	665.51	217.234	249.141	240.931	710.893	440.418	183.964	899.15	1086.25	495.861	1048.62	689.11	1319.03	1383.43	1309.74	1562.46	421.465	387.196	858.988	324.028	318.345	389.129	1000.17	585.961	992.308	300.426	235.221	253.705	344.693	912.825	577.552	562.111	608.33	435.21	280.792	122.902
1	20	18	36M12	CD119286	761.475	1317.83	860.653	248.174	323.208	369.213	946.186	1293.2	1076.3	259.181	392.923	311.313	1136.49	832.219	346.316	712.45	864.144	570.243	895.418	519.708	1258.41	944.523	1116.17	1434.13	1045.98	890.874	1685.8	433.056	432.439	555.218	2627.55	1236.5	1912.64	147.487	178.466	206.778	734.555	1379.09	732.564	311.632	429.244	376.045	492.137	502.784
1	21	18	36A24	CD116952	599.574	641.424	918.932	410.898	533.688	644.579	431.857	689.095	457.096	1600.89	1872.51	1838.77	445.419	611.881	582.768	873.169	1063.36	659.614	1170.42	620.846	1298.84	566.933	569.797	691.486	1448.59	1184.4	976.717	803.699	1509.68	1422.76	707.895	644.09	695.425	849.906	635.863	841.133	579.967	1303.14	1012.58	1262	1099.71	1741.3	376.731	592.154
1	22	18	3.6e+25	CD117592	4353.5	7512.2	7637.64	4654.64	4530.16	6764.67	4684.24	9244.51	6541.09	12582.6	14934.9	15509.8	5188.38	6917.86	3738.57	10004.9	8601.47	7054.08	10993.4	3942.34	11129.7	4892.65	5948.18	7705.63	14783	9308.12	7731.63	5338.58	9383.69	9189.11	5333.56	5765.34	8279.39	5608.96	5573.03	5205.14	4613.4	10677.2	10188.5	9052.99	7933.09	14437.4	4631.3	4751.09
1	23	18	36I24	CD118325	1787.12	3514.36	2754.18	1958.06	2975.53	3592.72	3787.99	5308.59	4145.19	3737.47	5190.58	4711.6	3307.91	3871.22	1478.94	4294.96	5303.46	3724.19	3523.82	1125.66	4137.08	2539.99	3038.73	3946.61	3237.4	2422.02	2118.17	541.575	897.74	894.859	2688.08	2209.6	3531.13	928.568	1073.48	889.598	1592.79	3162.65	3306.91	1405.06	1175.94	1672.3	1819.4	2080.58
1	24	18	36M24	CD119375	2829.46	4327.72	3233.31	13690.8	15601.5	18933.8	15820.1	22730.6	12450.6	3055.25	3364.92	4116	15050.8	9038.75	7548.62	16029.2	11785.6	9995.88	15561.8	17272.1	16170	22094.7	18619.4	24381.8	6019.68	4230.27	10255	7268.82	3127.81	7799.44	34584.2	10795.3	21926.3	5630.47	7532.56	4039.19	5697.37	15036.6	4679.51	2781.33	8586.31	3456.85	5950.73	8946.79
1	25	18	37A12	CD120295	1796.83	3946.91	2408.91	1259.56	1846.63	2801.33	198.792	328.058	256.055	728.894	635.58	851.638	151.264	184.084	99.811	274.086	240.345	95.9947	209.567	118.524	271.478	141.502	139.656	160.153	145.247	137.237	93.4313	79.3923	84.1628	105.209	106.335	83.6753	186.979	177.25	134.522	164.246	141.936	92.308	139.636	147.394	109.019	109.281	131.078	78.0207
1	26	18	37000000000000	CD121137	1087.68	2150.85	1013.54	162.637	219.785	253.067	182.857	317.515	234.114	1372.7	1531.68	1602.75	211.763	207.784	180.791	547.422	441.395	278.605	266.913	182.86	290.423	210.44	224.082	217.225	193.441	175.913	121.508	90.2676	171.686	97.4013	308.018	157.72	212.047	207.636	211.333	139.641	128.551	159.099	118.05	135.137	126.959	134.18	128.765	138.473
1	27	18	37I12	CD122168	706.846	1259.28	806.124	357.459	567.71	651.045	483.497	727.814	510.427	176.964	267.953	308.149	475.985	616.61	383.994	641.692	873.234	457.873	810.529	651.216	969.147	940.564	748.828	1057.64	411.112	433.176	403.515	157.768	218.192	168.365	979.066	488.37	820.239	499.416	389.246	490.536	234.628	485.916	294.679	373.647	314.563	269.462	347.237	429.49
1	28	18	37M12	CD123210	1054.37	1818.65	1006.29	5049.44	6982.02	9447.66	4650.65	7870.58	5064.19	690.033	617.161	1008.13	5081.93	6585.43	3726.25	6904.17	8034.21	4714.65	7555.64	5227.63	8016.47	7876.87	6869.6	10068.2	3033.66	3633.65	5961.39	1741.46	1150.73	1758.03	18743.7	7825.33	14483.1	6539.32	9251.92	7381.79	4563.68	9907.6	5323.72	4261.67	5055.65	2145.25	1823.52	2150.44
1	1	19	30M24	CD088291	16672.7	18105.7	25542.3	13212.9	11377.3	32853	24230.2	15885.8	14635.9	18403.4	29347.6	14661.5	24975.7	15927.9	11331.2	60533.1	39614.9	48187.8	26133.2	28013.7	37883.4	29751.1	22319.9	26278.4	36530.5	23577.7	29269.3	34338.9	36841.6	29091	36858.6	20424.7	42250.9	53361.8	73039.6	50160.5	68056.2	56764.4	53400	37206.1	48255.2	32953.6	30220.2	41797.9
1	2	19	31A12	CD089042	135.094	193.653	136.293	216.909	274.191	148.664	284.315	216.78	124.7	1656.44	1920.49	1127.8	387.805	190.951	245.407	446.682	278.328	198.044	262.705	227.561	235.506	220.406	190.007	132.423	502.187	350.224	298.23	379.74	378.108	261.702	232.552	152.89	261.075	406.714	210.74	296.736	168.177	349.626	305.216	239.492	192.124	504.846	170.178	1040.82
1	3	19	31000000000000	CD089597	310.971	388.08	369.945	178.163	254.435	218.99	261.924	448.008	240.261	325.281	362.561	211.649	207.898	199.545	215.51	645.981	430.875	251.863	329.261	182.37	196.512	456.294	426.603	484.743	532.146	309.879	246.671	143.682	241.08	220.832	858.317	499.733	666.804	259.082	170.244	228.066	233.982	331.243	438.095	158.489	148.79	369.454	146.066	127.673
1	4	19	31I12	CD090162	403.33	534.08	572.615	258.992	402.321	325.015	530.583	707.597	490.787	446.082	558.924	437.087	1248.82	624.516	309.831	2103.07	1729.91	1020.5	953.909	825.727	1403.75	1367.49	1389.9	1677.28	417.874	234.468	213.498	146.553	233.494	182.419	1701.05	892.33	782.922	473.354	723.903	721.224	352.268	526.837	432.19	175.915	224.073	387.77	136.247	151.275
1	5	19	31M12	CD090801	1610.52	1917.11	2574.38	137.233	154.229	154.637	202.67	403.385	205.213	675.465	786.849	603.284	527.245	326.186	212.217	1099.36	870.993	778.282	422.33	221.647	604.611	202.05	442.63	477.936	774.949	403.739	237.2	234.56	314.059	296.933	359.193	163.76	440.842	184.215	171.945	157.616	390.225	365.538	566.391	510.226	358.466	495.247	139.541	106.295
1	6	19	31A24	CD089078	101138	96598.1	101989	8017.52	7927.98	12724	21692.6	36724.7	23821	12971.8	15241.7	12987	58630.4	37574.3	17772.9	70007.1	73201.8	62416.4	31449	24831.2	48210	37967.7	40845.5	61469.6	21104.7	20952.4	13063.3	6063.25	4518.54	6166.18	36036.2	16896.4	19459.5	8805.68	15683.6	13258.2	13670.6	13802.2	10713.3	7570.98	6345.41	6238.54	5253.42	6858.97
1	7	19	3.1e+25	CD089702	1790.97	2764.42	2462.6	211.342	363.122	440.844	416.21	683.637	575.741	1118.24	1517.28	1008.44	619.778	348.489	217.682	908.905	633.265	582.728	760.887	404.828	1059.22	438.681	694.594	874.077	1109.87	500.627	453.253	238.581	319.865	259.131	781.872	435.791	688.269	479.626	628.236	522.461	472.752	476.268	499.256	507.755	446.053	456.006	256.216	202.594
1	8	19	31I24	CD090215	2059.76	1854.1	2538.19	1030.95	1875.04	3129.84	2073.34	1937.52	1827.7	2578.87	4032.3	2155.66	1200.52	1793.24	1626.59	1675.32	1505.58	1429.43	2486.15	2357.85	1732.75	2671.21	1570.26	1821.63	1607.98	1090.36	1088.74	766.98	1637.19	1214.05	1331.25	1200.54	2432.91	3293	6142.51	2063.83	2268.93	2308.91	2856.46	1257.2	1230.88	1871.14	2077.44	2110.54
1	9	19	31M24	CD090841	532.006	653.936	700.576	44.3304	144.631	105.394	184.758	263.956	239.053	490.959	430.068	468.135	277.079	200.722	135.59	339.647	326.522	227.272	216.453	169.283	156.451	156.796	236.956	191.665	176.502	300.778	68.8019	135.474	112.389	102.308	159.562	92.3664	88.4045	228.308	145.738	113.029	94.8755	145.44	140.913	73.3489	114.163	182.42	83.5886	123.815
1	10	19	32A12	CD091238	82697.5	80792.3	88050	815.163	837.946	1596.32	4382.97	6084.98	5469.59	6252.02	6697.25	6753.96	22411.8	10560.1	5294.01	13171.6	14515.2	14038.3	6776.69	5735.08	11199.2	10043.8	10182.7	13496.3	4609.85	4684.94	3480.69	466.05	593.106	959.337	1660.56	1280.69	1237.27	538.623	1046.35	737.097	1243.53	1533.08	1348.3	607.957	557.832	533.492	289.79	320.842
1	11	19	32000000000000	CD091773	152.55	343.841	332.475	145.921	123.8	54.0079	109.135	155.3	188.733	634.853	769.001	615.104	223.618	153.969	160.863	512.782	245.1	170.669	194.323	548.05	281.037	75.9915	194.373	63.4429	315.77	256.323	108.551	118.386	388.736	159.06	133.515	184.423	78.9945	101.375	71.0094	249.603	614.986	81.8767	312.99	288.564	232.912	269.188	35.2654	81.267
1	12	19	32I12	CD092463	14601.7	15412.9	18369	1356.6	1467.9	1565.67	1973.9	3833.71	2759.14	3307.58	4720.47	4514.92	3139.4	3325.58	1661.72	6945.99	6051.03	4486.83	3180.57	1803.64	3092.27	3116.93	3751.98	3969.8	5884.09	3256.31	2100.64	1446.68	2428.82	2082.77	2524.46	1999.37	3279.04	1943.51	2677.25	2083.19	1823.74	2887.12	1958.27	1776.23	2008.11	5044.65	899.463	941.744
1	13	19	32M12	CD093046	2185.52	3151.72	2718.89	1863.45	2564.79	3631.16	2284.25	2851.41	2198.08	1828.97	2731.5	2903.06	9942.16	4860.92	3012.78	8748.44	7996.95	5176.21	2727.31	2368.45	3530.15	4776.71	4449.79	5928.75	1840.09	1507.58	2047.3	1217.56	1070.48	1437.48	6847.21	2865.78	5512.35	2359.21	3044.61	2265.73	2251.02	3421.69	2845.91	1713.72	2417.96	1919.57	1074.42	1242
1	14	19	32A24	CD091289	241.564	373.046	275.937	276.578	506.912	462.37	393.255	632.592	399.739	691.099	687.297	676.232	336.002	623.904	416.128	773.027	594.634	346.334	684.853	390.062	396.719	291.877	419.258	380.608	966.681	643.679	384.66	410.329	589.956	453.416	442.287	453.3	811.257	691.612	590.005	427.572	402.821	899.537	700.725	438.904	696.013	1063.06	170.98	239.259
1	15	19	3.2e+25	CD091894	5520.02	8483.11	6665.16	85.9559	143.792	283.855	484.496	664.512	559.463	502.669	673.96	636.996	960.668	553.272	301.794	1150.23	744.668	610.644	302.774	214.195	484.947	630.339	645.567	815.572	281.69	172.762	334.76	103.847	144.05	96.4186	285.453	160.014	240.432	197.327	165.463	192.871	168.951	189.002	294.79	138.325	249.202	187.151	106.443	97.4452
1	16	19	32I24	CD092542	1127.84	1709.52	1458.52	2170.53	2429.32	3619.19	5354.19	6325.48	5315.63	1433.56	1338.2	1527	1558.81	1280.66	507.878	1046.01	966.178	663.836	1384.65	988.89	1643.54	1633.82	1811.48	2271.19	1285.5	782.914	1109.59	1300.68	1154.73	1451.26	9252.91	4520.77	5425.59	1198.81	1856.91	1545.35	844.152	1644.68	1281.77	1364.39	1211.84	1031.97	3813.45	3505.19
1	17	19	32M24	CD093122	1502.7	1408.07	1842.66	762.677	1271.27	1195.2	852.333	982.96	889.492	7350.84	7834.19	8588.48	1447.13	1695.47	1023.46	1879.84	2288.24	1375.12	2157.67	1207.21	2838.75	904.372	1185.91	1458.44	3674.08	2235.31	2056.96	1748.78	3317.58	3094.41	1007.15	850.605	1535.87	1468.06	1356.72	1284.01	1206.86	2336.52	2324.18	2635.2	2346.55	2861.5	760.467	921.931
1	18	19	33A12	CD093381	1675.13	2429.04	2552.4	1643.47	1641.33	2769.2	2482.3	4093.97	2963.39	3063.36	3517.54	3882.34	2450.97	2435.96	1488.71	4049.47	2814.97	2571.99	3237.88	1649.91	3889.53	2775.34	2731.63	4137.04	4957.12	2658.99	2116.34	1239.8	2703.84	2122.08	4153.61	3132.74	3614.2	3042.71	3887.98	3484.65	1939.18	5117.92	3633.14	2219.01	2230.74	4779.61	1714.43	1623.05
1	19	19	33000000000000	CD094071	76954.9	80755	81430.4	3812.83	3767.35	5634.68	10373.8	15593.1	11605.5	6489.2	8053.42	8905.46	33636.8	20735.1	11938.5	27473.3	34778.7	28308	10422.2	10895.1	16084.7	23030.5	19500.4	25030.7	7364.88	7295.56	7598.78	4061.39	3254.48	5071.24	14463.1	8256.02	13871.8	4648.21	8305.89	5556.4	7507.54	9716.64	6960.15	4697.6	5759.53	5492.3	3225.68	5484.58
1	20	19	94000000000000	mCD036972	212.523	110.33	78.6876	193.282	210.632	45.3365	173.661	104.757	67.8379	1018.42	1003.69	886.72	107.888	140.063	134.2	69.9834	196.62	133.163	181.326	96.2731	252.435	84.6628	206.302	202.203	114.005	71.4936	113.68	181.232	340.547	225.499	93.6596	214.739	153.534	152.339	167.613	298.567	269.633	225.777	253.397	124.571	217.371	282.588	106.69	263.829
1	21	19	33I12	CD095015	2620.64	4575.84	2787.48	6986.39	8537.41	14017.4	10899.6	17239.5	11391.4	1697.24	1843.12	2374.36	14681.7	10711.2	6541.14	13070	12228.3	9167.2	14310.5	10415.9	15626.1	14971.8	15149.6	20548.1	13430.8	10599.4	14417.7	3395.6	2413.39	3557.87	23255.3	9155.12	20697.2	1826.03	2400.34	1759.25	10648	18179.8	13242.3	2019.58	2807.02	2864.45	5296.18	7473.14
1	22	19	33M12	CD096221	2437.6	3880.64	3665.24	2705.07	2317.33	3242.68	2831.54	6579.05	4119.37	3445.85	4175.87	3620.15	1882.3	2876.18	1850.63	5224.98	3454.48	3398.93	4248.83	1723.65	4314.09	2320.53	2773.67	3733.59	7264.35	4304.81	2670.41	1741.81	3615.78	3128.86	2883.97	3459.69	4171.78	2458.36	2528.41	2568.91	2221.88	5414.74	4765.64	2908.01	2830.4	7330.48	2080.87	2264.78
1	23	19	33A24	CD093475	2084.53	2465.35	2981.85	613.207	958.6	830.789	738.609	1151.43	896.261	2850.37	3227.54	3782.35	3617.68	4466.6	2524.08	1861.56	1876.25	1289.77	1618.6	704.601	1487.81	954.841	942.536	1055.11	2201.37	1395.17	1151.96	1034.04	1731.44	1403.74	1059.19	792.879	1236.1	1124.8	779.209	1064.53	886.176	1710.42	1684.87	1389.69	1353.85	2164.73	559.16	775.586
1	24	19	3.3e+25	CD094132	7547.88	11555.8	8937.39	2431.25	2865.11	2863.48	3932.76	6725.64	4433.48	3929.41	4865.16	4345.26	3768.02	4990.52	2496.1	7001.56	7758.09	5408.78	8187.11	3570.89	9457.47	6668.4	6402.84	7316.03	7086.79	4822.33	3745.8	2759.95	4062.28	3502.4	5611.67	3855.51	7274.14	3132.07	4342.07	3658.98	3026.37	4309.46	4994.58	3655.02	3452.54	5093.91	2649.2	2753.62
1	25	19	33I24	CD095137	995.628	1584.36	1190.14	941.646	1300.15	1100.76	697.61	1326.66	805.07	3311.25	3862.85	3551.37	740.319	1113.1	804.898	1354.52	1229.26	1093.4	1009.35	1097.96	1078.09	835.043	714.954	762.246	1993.35	1310.46	894.385	721.484	1549.47	1021.93	783.625	664.217	958.73	1319.23	1543.36	1282.36	1087.71	1137.56	1016.16	1570.78	1432.62	1404.94	876.008	590.977
1	26	19	33M24	CD096327	1440.52	3044.71	1618.96	172.242	200.427	237.657	285.317	323.093	285.952	413.137	407.954	427.909	263.594	404.933	201.885	1516.72	1368.34	910.523	538.38	332.153	672.331	524.526	510.632	647.503	281.514	245.478	151.615	140.281	175.789	187.353	460.138	283.435	391.457	583.606	633.618	591.351	157.041	286.036	464.217	202.579	237.732	213.572	231.817	134.455
1	27	19	emp	emp	63.0371	14.6214	484.476	128.999	317.315	21.6976	687.351	184.635	102.439	144.479	315.898	47.5614	83.3466	122.382	102.201	59.3505	198.81	139.525	72.1434	49.6584	73.8226	127.302	46.3196	26.6637	52.188	36.4401	189.136	154.236	232.232	113.558	39.8005	74.711	13.7929	110.897	25.5294	59.7167	56.5333	36.342	116.446	79.2102	84.5048	152.817	65.2638	294.897
1	28	19	34A12	CD096967	8230.63	14014.5	9102.19	9818.19	11355.7	15465.2	17781.7	25124	17014	8419.24	9924.72	12151.7	9029.92	10711.9	6391.11	10463	9788.73	7466.17	18297.7	9724.62	15600.3	23535.8	20755.8	31688.2	20989.5	19212.2	27502.5	9401.41	7266.38	9176.2	39850	20176	38973.2	6721.24	8483.41	7819.23	22927.8	48949.2	28059.1	7882.99	10707.8	10339.9	5997.41	7552.28
1	1	20	2.7e+25	CD079137	3073.85	3851.78	3754.33	3641.9	4237.97	6944.47	7179.39	10225.3	6227.19	7388.25	9282.93	6560.34	15368.3	6334.91	3305.05	15796.5	9255.77	9635.38	11582.9	8029.52	18822.1	9354.01	10995.5	14365.4	21800.3	12859.7	12180.2	6659.43	5611.69	5895.08	23109.2	11345.3	13051.5	17976.1	19837.4	22135.9	23111.5	34784	24419.4	9994.63	8485.63	10117	12053.3	12509.9
1	2	20	27I24	CD079999	9548.31	9476.43	11858.6	2293.71	2308.06	4431.83	3038.89	4979.19	2748.68	986.904	1204.16	900.467	27868.1	15297	8993.95	56435.3	38017.2	37219.1	22658.4	15304.3	29633.6	9378.95	10399.2	14421.9	28685.8	19275.2	15183.2	5654.33	4639.46	4423.09	23803.2	9782.52	14306.3	5845.65	7673.4	8591.9	29465.3	32286.5	25507.4	9105.18	8493.97	11864.2	5453.61	5772.64
1	3	20	27M24	CD080860	1601.28	2576.34	2520.44	2704.55	3569.19	5567.68	8932.58	8932.1	6570.32	831.278	838.941	755.911	10693.1	3369.94	1659.93	4523.42	3273.5	2895.81	4727.35	3945.62	8072.39	8543.92	8818.27	12576.7	14527.8	9460.43	10823.9	1745.27	1106.25	1582.98	31245.4	17554.5	19231	2514.3	3089.3	3372.23	5332.79	8608.07	6062.75	2526.12	1881.69	979.011	4478.58	3884.78
1	4	20	28A12	CD081520	321.752	411.384	452.297	355.568	644.964	359.68	547.434	853.887	529.588	2831.35	3159.44	2812.3	446.754	478.616	444.89	1100.34	676.71	429.99	597.871	629.83	655.071	421.016	556.718	653.351	1161.04	817.342	574.883	673.757	774.22	887.475	613.635	543.723	671.761	770.323	938.107	836.319	659.213	1225.29	957.667	623.801	612.526	1708.09	482.353	323.022
1	5	20	28000000000000	CD082606	1532.63	1556.95	1905.5	1160.29	1569.34	2161.27	5027.15	5372.63	3854.25	2677.3	3810.94	2639.31	2578.1	1010.14	700.53	4922.02	3675.29	3294.76	4018.87	3038.85	6637.55	3732.61	4500.66	6253.04	4398.08	2985.12	3161.09	2473.99	2404.95	2949.25	36799.5	18595.8	19990.3	6457.95	7864.47	8132.78	4947.25	8075.27	5898.29	7646.81	6132.21	3289.22	989.175	885.031
1	6	20	28I12	CD083676	2033.11	2504.01	2668.25	1103.8	1674.39	2166.77	3558.6	3500.34	2636.07	1634.3	1829.88	1798.83	5292.02	1806.62	972.215	10593.1	8374.4	6200.03	4225.32	3915.21	7183.88	7511.46	7845.87	9464.87	3287.88	2420.04	2744.26	1441.94	1302.14	1754.63	11730.7	5603.96	7241.15	3575.86	4102.9	3663.51	1488.29	2480.73	1819.85	1423.33	1326.82	1239.46	1630.45	1383.04
1	7	20	28M12	CD084288	1450.98	1755.15	1815.46	2419.67	3229.5	4487.61	1681.73	2186.32	1509.72	1018.37	1323.65	1036.09	37851.5	20759.9	10907.5	26412.3	22797.6	17166.7	8265.03	7168.64	12472.7	11335.7	11039.3	14571.2	6993.42	5481.18	5709.29	989.698	968.417	1252.45	5544.25	2853.82	3420.17	2433.23	2682.13	2680.78	4332.91	8203.43	5003.24	2378.17	2475.51	2330.8	2182.42	1953.37
1	8	20	28A24	CD081705	2369.19	3758.03	3501.24	1007.32	1369.12	2143.04	2364.34	2647	2334.49	1337.73	1596.77	1372.96	2748.02	1144.21	672.513	3611.74	2458.08	2336.93	3269.51	2463.86	4817.94	3947.04	4370.84	6461.32	1874.23	1007.59	907.722	848.168	968.24	1079.54	4006.62	2146.31	2768.33	1398.86	1873.76	1708.25	925.759	1778.86	1359.2	1136.38	1198.9	1528.03	835.742	751.615
1	9	20	2.8e+25	CD082779	3255.41	4508.45	3918.81	11339.9	14326.8	22823	19076	16817.3	15242.4	4850.68	5639.87	5902.25	23217.9	11047	7162.1	18966.1	15026.4	12233.5	17444.7	17179.6	19304.1	22679	19190.5	24687.6	20400.3	17649.1	18629.5	6027.73	5348.12	6591.02	30770.7	16099.4	31153.8	17680.8	21356.8	13257.7	22777.1	31551.4	22142.7	10545.1	11607.5	11576.1	10488	11221.1
1	10	20	28I24	CD083766	413.513	655.825	583.144	145.464	353.596	395.683	166.235	377.922	273.468	1112.28	1516.27	1324.99	244.141	309.565	169.232	332.067	233.767	189.066	237.226	153.609	200.526	139.92	176.171	192.481	222.985	171.657	143.423	113.46	179.175	129.727	199.645	115.039	151.416	257.485	197.14	208.475	197.231	429.134	388.146	318.755	234.417	350.122	72.5662	92.6755
1	11	20	28M24	CD084411	771.915	1011.26	961.061	1042.01	1321.74	1561.63	5783.27	7006.92	5566.81	1974.05	2209.31	2227.43	28994.7	16653.3	7509.44	11668.8	10652.9	6656.25	12437.4	10399.4	16743.4	15354.6	15608.3	19170	9299.7	7447.79	10124.4	1590.19	1513.9	1632.59	16317	7799.84	11194.1	10919.3	14694.5	13097.1	25876.4	44064.4	28560.4	17904.4	19216.4	14018.7	4746.68	5256.55
1	12	20	29A12	CD084785	2782.8	2730.69	4111.21	1210.92	1647.08	2227.53	1919.34	2779.35	2224.38	3917.56	4223.14	3752.58	2394.72	2136.27	1244.68	3881.75	3791.56	3334.34	3653.94	2086.61	5060.55	1642.36	2196.08	2642.5	6248.84	3607.38	3468.32	2550.35	4752.99	4249.27	2135.74	1736.23	2720.52	2595.19	2708.64	2762.38	2442.4	4531.75	4217.11	4035.64	3723.18	5801.4	1553.71	1910.16
1	13	20	29000000000000	CD085187	168.799	232.29	228.601	200.009	407.535	506.318	265.948	230.191	203.955	1671.88	1587.99	1814.27	303.081	272.497	253.605	448.087	431.531	292.558	413.303	121.092	615.837	208.789	403.2	354.419	535.79	402.26	560.064	504.756	809.102	643.17	375.35	368.612	490.302	644.852	301.619	467.702	289.117	736.879	681.271	473.842	475.183	735.47	270.611	237.665
1	14	20	96000000000000	SPOTTINGBUFFER_E_12	74.4453	52.6361	98.1138	100.94	180.266	197.087	191.582	78.898	120.688	134.448	164.595	14.5124	62.3573	86.3082	141.067	43.3868	76.5257	22.3722	71.4239	179.529	21.8747	79.5263	95.9284	85.6891	51.6154	27.7564	87.1414	202.74	209.426	70.0774	39.4239	91.9505	92.5462	111.707	52.1095	78.9919	76.6336	33.9147	21.7404	52.2451	268.54	136.701	63.8102	202.277
1	15	20	29I12	CD085510	329.986	549.816	469.791	109.289	346.818	159.533	373.539	476.685	506.058	350.57	375.889	325.832	255.75	268.479	89.8605	276.286	307.985	190.996	495.767	162.425	687.146	372.78	636.495	744.961	670.38	341.824	391.398	206.028	361.759	286.36	655.121	422.461	569.154	338.897	257.012	255.063	737.384	596.545	895.401	581.159	483.488	421.08	277.559	324.32
1	16	20	29M12	CD086148	7130.71	10528.9	8638.44	6383.76	8002.73	13941.1	18999.6	25022.1	20322.7	2098.92	2119.21	3113.89	19460.4	11987.7	6063.77	20652.8	20338.8	15088.4	19617.2	12729.2	23307.1	19244.6	21213.1	28785.9	15089.6	12730.7	17882.2	8743.82	6786.75	9829.78	36541.9	16382.5	30100.5	4225.41	5822.39	4504.35	3162.68	5994.94	4299.37	3166.75	4082.07	2927.24	8157.81	9490.12
1	17	20	29A24	CD084900	380.975	351.936	409.056	290.577	180.704	198.785	261.172	413.759	266.101	2812.92	2921.45	3149.74	222.803	299.823	293.452	508.87	545.408	379.765	696.743	312.436	952.333	165.186	303.558	371.23	735.176	515.264	467.549	387.21	731.62	638.889	337.65	364.459	392.628	398.494	259.458	451.603	329.627	681.937	628.589	648.385	526.175	712.283	205.826	165.652
1	18	20	emp	emp	301.301	100.198	110.638	155.555	265.245	263.188	72.7167	183.198	6.68665	127.209	189.185	18.9693	66.9082	142.338	197.528	64.4135	101.969	61.8366	48.8381	19.0015	38.929	64.2	20.0918	43.7498	15.5296	17.7336	64.0743	579.076	290.416	370.369	48.7074	75.9606	60.5774	50.8264	12.4865	177.391	532.297	16.1689	100.436	80.9397	303.298	106.955	230.768	219.29
1	19	20	2.9e+25	CD085216	898.586	670.67	1197.65	567.896	697.852	771.462	813.569	1144.88	853.622	2245.93	2443.26	2399.05	673.295	761.278	630.315	1075.15	1232.25	858.217	1148.37	696.349	1532.88	714.238	845.799	1018.78	2016.56	1308.31	1003.32	682.372	1680.23	1288.94	824.76	784.457	1038.68	957.706	1004.86	938.198	840.054	1250.46	1323.21	1526.1	1297.84	1848.02	604.772	662.491
1	20	20	29I24	CD085622	143.141	281.496	289.549	77.7103	237.011	159.72	143.922	201.445	87.8045	1592.79	1469.07	1791.43	265.767	181.576	240.917	187.637	191.401	114.472	286.662	149.974	230.868	139.933	195.606	139.603	370.371	336.346	139.1	97.0648	218.354	229.178	111.349	144.495	272.446	161.743	200.356	264.964	151.406	177.409	257.147	266.237	172.421	473.948	233.919	122.822
1	21	20	29M24	CD086217	227.902	194.125	168.944	167.998	461.263	146.378	110.455	413.396	223.359	949.643	946.306	959.659	314.772	380.056	347.692	4819.93	6476.27	2806.49	495.022	159.096	425.296	142.521	261.539	122.262	439.077	289.657	186.882	297.091	361.084	220.469	149.244	141.062	206.891	295.525	108.326	273.562	121.994	231.234	245.76	257.865	203.897	699.67	154.249	185.47
1	22	20	30A12	CD086722	6569.65	12944.5	9141.73	2905.5	2946.79	3727.9	3182.28	5588.59	4647.82	4080.68	4555.37	4056.93	36594.6	48702.8	23874.3	7204.93	6745.03	5441.57	6101.06	2119.46	6938.92	2862.69	3774.07	5107.98	8394.65	5385.68	5025.44	3373.9	5157.3	5515.86	3360.25	3670.36	5103.04	3303.26	2991.32	3379.83	3049.74	7147.64	6791.3	5414.31	4765.75	9658.22	2924.84	3269.48
1	23	20	30000000000000	CD087254	2505.01	4072.82	2783.8	75.2127	441.034	172.298	146.408	273.11	211.47	241.737	352.128	274.277	166.782	179.409	90.31	417.813	329.959	168.258	252.439	140.068	262.678	239.63	342.491	321.566	185.525	175.22	128.306	84.6146	97.4725	99.8309	232.61	136.607	222.243	126.138	124.287	129.707	108.08	102.847	122.742	150.244	110.194	106.827	69.89	117.557
1	24	20	30I12	CD087666	165.907	425.897	173.197	72.4583	400.236	97.3379	116.832	151.759	136.143	406.974	448.625	537.926	109.56	178.364	203.821	277.992	237.715	180.505	259.585	227.092	184.193	169.136	221.743	224.942	138.636	121.455	91.525	88.0077	123.268	136.489	229.871	154.835	151.337	168.806	228.066	182.878	158.761	112.097	176.642	126.508	161.991	117.717	74.8692	93.7778
1	25	20	30M12	CD088245	381.515	645.58	540.24	386.271	514.251	461.328	268.29	575.244	414.483	656.731	846.598	808.353	435.191	451.877	409.188	727.199	801.9	415.1	920.003	441.082	870.386	739.659	689.1	881.507	762.164	474.974	392.304	433.746	555.558	735.257	995.071	624.396	810.91	442.634	337.95	505.404	409.205	642.668	654.571	486.624	563.94	897.555	373.89	214.996
1	26	20	30A24	CD086842	3218.05	3381.03	5961.51	136.707	308.665	374.902	257.163	246.064	266.054	401.522	523.011	351.645	501.191	731.34	263.147	1139.18	1136.95	944.752	817.435	602.552	508.489	660.201	423.16	529.125	551.664	396.271	158.067	116.621	145.154	107.848	166.898	125.4	158.54	122.792	159.245	181.605	189.018	242.613	309.721	127.427	161.394	89.5726	126.342	264.171
1	27	20	3e+25	CD087308	1017.83	1961.19	1094.29	364.525	369.492	436.243	198.273	633.262	348.319	711.893	952.14	1058	411.694	576.59	344.659	1174.58	695.57	637.488	740.923	355.814	661.737	492.65	518.942	716.919	763.218	562.469	308.687	236.87	467.985	343.955	349.139	224.669	657.17	430.401	310.87	507.077	259.143	533.777	677.725	321.196	339.548	579.336	253.095	251.175
1	28	20	30I24	CD087715	324.769	389.725	289.289	306.973	475.872	496.512	365.955	349.98	317.795	1059.12	1100.06	1456.56	242.511	258.086	263.439	356.418	399.545	320.58	589.462	296.771	558.926	252.807	245.595	379.252	406.511	460.795	402.359	429.954	515.312	545.09	205.585	335.674	335.032	427.904	195.495	456.175	305.547	747.46	505.06	577.874	414.708	773.632	171.418	187.349
1	1	21	24I12	CD068432	748.766	718.501	947.299	318.978	364.993	414.665	1389.97	900.237	636.263	899.26	786.626	611.218	3382.31	625.442	436.458	1310.53	935.675	525.894	861.34	988.081	1307.22	2373.54	2479.39	2514.92	627.556	728.435	601.687	1218.71	921.225	1233.75	8085.67	4756.45	3453.72	2039.72	2367.58	2218.28	490.856	619.433	672.679	1852.53	1301.92	968.287	193.577	115.563
1	2	21	24M12	CD069179	416.858	336.222	475.676	185.303	189.445	308.931	1349.67	1280.46	782.818	623.764	762.126	525.168	1247.24	454.408	315.352	1246.08	957.079	520.282	739.519	758.286	1300.38	2047.56	2461.44	2596.31	768.647	673.37	629.3	324.229	313.78	404.801	2312.52	1294.05	1105.06	333.48	295.546	288.591	849.838	1116.15	828.407	246.472	279.909	255.329	189.836	124.376
1	3	21	24A24	CD067041	411.975	710.142	474.296	268.3	326.172	348.995	1410.1	1508.56	1009.69	227.165	238.709	253.822	196.69	177.118	124.741	338.895	234.799	186.166	200.706	115.742	219.217	273.385	353.154	350.048	265.156	179.342	196.949	187.224	211.59	316.548	3319.53	1797.95	1744.96	513.256	404.044	438.206	292.651	459.987	435.723	96.753	154.076	158.125	324.572	276.333
1	4	21	2.4e+25	CD067688	4783.7	7662.63	6868.62	7570.81	8990.05	13760.8	13123.2	12014.1	9522.28	5579.11	5714.37	5311.21	25155.7	9398.46	4248.74	17539	10443.6	8867.27	12900	11447.3	17320.2	11180.7	10856.3	14249.8	7739.31	5522.88	5803.3	2431.52	2431.95	2797.09	20891.1	13745	14502.8	13110.9	17987.1	16559.1	6294.39	10558.2	8918.39	8756.4	5936.38	6171.5	5169.62	4773.14
1	5	21	24I24	CD068504	711.734	1061.55	943.712	119.714	160.917	161.808	267.277	330.641	278.461	216.069	244.475	189.762	323.797	166.555	129.06	538.219	383.746	270.528	322.875	192.396	444.718	299.674	366.792	526.45	241.085	136.365	240.778	78.4264	126.051	106.017	469.291	162.153	251.666	449.27	505.748	566.682	131.231	151.125	169.157	143.337	150.223	115.848	121.737	75.341
1	6	21	24M24	CD069221	10612.4	11375.8	14978.1	301.823	385.848	464.369	1331.38	1682.97	1177.46	1476.55	1580.54	1267.28	2985.78	1001.86	396.207	4087.82	3219.29	2787.03	1635.48	1032.1	2216.3	2311.98	2682.62	3287.86	1365.06	784.435	621.649	455.87	514.967	454.511	1189.95	739.77	1059.33	538.763	952.958	763.731	432.165	631.448	582.99	460.342	389.432	667.491	234.493	231.452
1	7	21	25A12	CD069789	1151.3	1730.25	1371.59	1669.3	1978.15	3216.42	5186.18	6380.63	4267.75	740.15	731.501	620.699	20113.7	7743.7	3407.95	8043.39	7087.5	5627.7	5443.63	4129.06	9971.69	5400.41	7368.75	8753.16	8983.96	6487.77	7598.02	5049.84	3353.21	4900.91	19539.6	8708.84	11806.4	1750.93	2016.43	2415.93	4757.58	7875.65	4317.99	3799.19	4080.73	3403.4	2847.1	3069.14
1	8	21	94I12	mCD037068	46.7674	20.0967	21.2534	14.7042	171.402	92.7825	68.827	100.766	111.437	12.027	143.635	11.3306	58.0461	52.1683	22.8784	138.87	154.127	69.1254	26.669	82.3847	35.7498	48.6725	8.11907	11.3709	29.1581	81.5728	31.304	190.209	149.225	16.0532	34.3392	85.3093	60.0009	35.1321	72.0535	85.2964	39.6981	13.9791	39.296	128.933	30.7767	66.2865	361.922	45.0161
1	9	21	25000000000000	CD071734	583.385	586.949	705.74	502.136	638.043	621.4	2013.5	2016.97	1731.78	1149.65	1200.93	971.517	378.9	338.358	256.797	666.486	345.328	301.942	816.205	596.828	1264.33	1011.42	1055.02	1390.41	737.129	538.891	517.209	452.488	639.865	567.188	4663.7	2280.53	2250.74	1324.12	1591.4	1574.52	727.059	1505.59	980.615	782.779	717.054	760.99	690.403	669.622
1	10	21	25I12	CD073077	238.283	126.657	19.4875	55.7591	208.76	119.227	95.5194	262.418	91.1621	1200.57	1190.16	1064.09	98.1663	277.123	255.427	327.196	102.419	103.175	226.474	67.19	158.28	101.978	170.565	189.314	333.59	324.737	230.959	166.347	308.183	213.399	272.313	221.602	303.885	161.411	115.02	177.511	151.789	467.762	299.713	38.7136	187.063	559.119	66.7565	101.721
1	11	21	25M12	CD074215	4566.21	4538.04	4475.78	5045.02	6550.44	10580.8	8386.47	11581.4	7508.89	7320.09	8507.81	8630.65	7935.67	4600.63	2698.71	6037.02	6071.53	4344.38	10207.6	8542.74	12580.6	8649.84	7909.01	9803.59	9021.57	7599.53	10047.9	10795.3	9920.66	11610.3	14169.7	5714.11	10621.5	8791.23	14785	11410	13889.9	16108.5	12431.8	18056.8	20171	8233.54	4851.46	6039.78
1	12	21	25A24	CD069931	1239.58	1058.16	1566.65	596.417	783.433	764.328	918.804	1417.15	1029.5	4137.93	4582.55	4534.77	1052.04	963.11	519.735	1739.54	1609.39	1201.19	1848.94	957.84	2501.28	886.681	1213.69	1479.45	2599.48	1585.5	1421.16	1285.6	2299.82	2005.2	954.46	739.006	1219.4	1368.85	1339.08	1629.38	1004.36	1756.59	1474.74	2043.48	1951.01	2317.01	710.795	786.818
1	13	21	2.5e+25	CD071781	1693.11	2522.82	2304.78	921.965	1197.97	2036.04	3742.46	5125.26	3482.84	238.333	292.084	257.552	8397.95	4584.11	2473.21	7204.74	6737.07	4991.99	4498.6	3739.94	6020.71	6944.62	7631.52	9885.94	4072.6	3499.25	4396.15	700.288	614.448	741.572	3199.98	1248.09	2582.96	1105.62	1360.97	1374.81	2373.31	3612.26	3226.17	853.376	815.795	841.409	585.259	673.661
1	14	21	25I24	CD073168	712.326	943.233	832.059	70.3064	160.314	128.944	120.169	184.069	116.101	742.487	837.66	1131.49	173.975	177.178	129.705	541.484	450.633	359.286	319.83	249.242	423.604	397.186	417.668	585.814	197.034	127.826	155.526	136.436	240.303	228.239	398.503	128.962	189.515	256.492	171.263	188.971	641.731	1173.63	883.122	556.379	532.533	501.95	135.532	123.568
1	15	21	25M24	CD074496	253.72	377.015	358.704	92.501	135.437	93.8267	73.9366	143.989	99.7404	91.5591	120.521	121.356	53.6975	126.567	106.508	187.241	184.985	107.367	206.565	227.822	425.532	354.455	337.746	505.06	1632.68	1325.06	1579.73	2712.75	2946.46	2944.34	3999.33	2749.65	5349.62	1451.88	3046	2189.99	6576.29	6803.27	5387.34	2876.25	3447.77	2619.01	1803.88	2216.45
1	16	21	26A12	CD075739	6012.1	8122.36	6049.49	23279.8	29698.1	39984.8	49497.6	48236.5	44267.4	8179.52	7903.61	10910.5	15731.2	11368.6	5420.24	18166.6	17779.3	11048.3	26526.2	19619	33401.9	34334.7	32638.8	43080.9	22882.9	22805.1	27780.8	15144.2	14087.4	18696	45710.1	36788.5	52811.6	65253.8	75195.7	64073.4	36981.4	61123.9	45092.3	26986.8	30001.4	24570.8	31062.9	30126.5
1	17	21	26000000000000	CD076671	71875.1	71475.9	82143.8	3198.12	3549.45	5256.57	9383.07	12582.1	9344.93	6674.36	8495.74	8566.76	14308.6	11750.6	6376.26	16706.5	18742.8	17356.6	9378	10172.7	15320.8	16639.5	12912.5	18408.4	4897.22	4497.31	4258.21	2284.91	2564.58	3100.53	12229.4	8632.96	8970.43	5414.11	11818.3	7459.03	3540.01	3886.8	3051.5	4117.15	3946.04	3234.27	2687.54	3136.55
1	18	21	26I12	CD077217	285.211	299.918	315.27	111.585	143	199.538	137.286	246.167	139.832	587.616	791.058	851.025	150.503	154.38	155.911	302.698	261.062	231.192	227.428	169.368	203.201	152.638	201.145	226.647	398.131	244.148	126.545	150.949	277.887	230.952	380.399	271.456	386.703	223.229	192.589	227.425	300.132	386.261	526.377	377.831	297.371	474.958	257.177	316.364
1	19	21	26M12	CD077703	2609.08	3574.46	4085.81	6178.52	6908.31	9485.27	8415.85	10577.4	7197.89	3956.67	4270.22	5181.12	14726.7	6594.44	4672.06	18736.5	12119.8	11253.8	11487.2	10498.8	13309.9	12623.5	13359.8	16696.6	6867.56	3807.03	6133.05	3506.61	2740.28	5130.82	19541.5	8610.66	13871.1	7586.65	11684.3	8661.8	6027.24	12537.2	6077.37	8589.4	13304.4	7802.85	5330.45	6567.41
1	20	21	26A24	CD075848	5102.52	5599.13	5130.79	15881.2	19741.3	26904	20653.2	22788.6	17669.8	9437.11	10235.4	12014.6	33432.3	38065	28587.4	67752.3	60298	47110.9	53939.9	54597.5	49782.2	47180.9	41689.9	47587.3	31481.7	35370	57497.3	15138.1	13445.3	16688.8	38444.5	28348.9	50732.1	14001	24158.1	19938.9	53284.2	73075.1	60564.4	40966.1	54303.4	37300.4	19659.6	25638.8
1	21	21	2.6e+25	CD076753	2881.06	4026.29	3796.02	3142.04	3663.4	4857.83	3620.76	5930.78	4061.39	5616.27	7040.53	7389.73	7618.75	6394.64	3958.63	9427.07	7757.4	5713.46	12580.8	8150.39	13972.7	12081.3	11716.8	14899.1	10747.2	7174.75	7920.88	4208.99	5773.66	5702.36	17244.3	8771.41	14958.8	6492.23	8352.18	6941.07	8402.84	16250.2	11680.1	8177.14	10160.6	10769.5	5072.7	6009.44
1	22	21	26I24	CD077319	544.595	972.044	633.952	139.758	358.044	313.386	578.925	901.051	627.788	302.851	320.895	314.577	515.972	523.315	329.005	1351.72	1249.33	822.55	1301.9	842.189	1505.72	1105.2	1281.45	1616.94	620.089	396.434	490.999	347.52	291.524	350.879	1047.21	492.014	820.688	344.426	268.8	285.825	253.587	419.223	424.872	322.155	385.059	433.597	282.92	329.727
1	23	21	26M24	CD077798	799.048	1535.51	1027.5	204.391	387.565	250.39	368.908	676.813	317.472	712.621	857.548	743.515	704.656	747.17	358.549	1160.37	1010.97	809.403	1308.54	753.791	1576.99	2033.59	2217.19	3061.25	7182.76	5478.61	7386.32	14142.3	10182.4	15226.1	44251.6	33686.4	60869.3	36973.7	50697.9	34934.2	57570.2	72028.2	86156.6	28755	42575.2	34147.1	80218.9	57344.7
1	24	21	27A12	CD078033	4578.75	6939.64	5027.56	2207.02	2364.97	3816.57	3130.34	5198.55	3499.26	2137.82	2172.66	2312.75	5109.85	4442.65	2130.89	6016.98	6402.64	4042.85	6539.14	4195.43	7240.55	5022.4	5266.2	7072.39	3362.73	2511.72	3913.06	3460.46	2541.77	3727.43	9131.96	4667.73	6588.59	2782.08	4028.05	3844.87	1876.42	3831.04	2536.33	4292.4	5187.09	3079.24	3419.9	4009.57
1	25	21	27000000000000	CD078993	1182.3	2349.56	1420.9	1809.18	2448.49	3357.5	3834.28	5661.64	3714.79	1250.24	1386.79	1475.34	5533.66	5341.65	3200.8	4048.66	3699.85	2439.45	6152.07	4526.55	7143.37	7889.14	7155.29	10169.3	3106.16	2822.56	4276.73	2041.98	1341.16	2089.61	17516.4	7616.94	13817.8	4175.11	5412.78	4418.87	4742.22	9018.21	5343.64	3359.24	4824.26	2822.82	2832.12	3399.05
1	26	21	27I12	CD079920	79420.4	84748.2	102874	4137.46	4871.7	4900.11	10298.3	15620.4	8496.8	7021.08	9119.97	10477.5	22631.1	19746.8	11103.9	21320.7	25551.7	26202.4	12179.3	10981.6	13691.2	22741.4	15444.4	24584.1	7103.83	6324.26	6347.68	2093.36	1393.49	2721.88	8329.64	6641.07	8831.49	2809.94	6542.77	4418.25	4587.66	6496.19	5886.55	4067.86	3514.14	2978.07	3189.5	4972.69
1	27	21	27M12	CD080665	3687.66	5867.6	4261.13	6334.65	8300.68	10054.9	15405.4	18508.9	11933.7	2464.97	2483.55	3184.24	7295.48	8446.63	4346.32	13399.1	12987.2	8077.32	15876.5	11224.1	16481.8	12506.3	11673.9	16915.4	4186.54	4129.65	6144.74	1421.64	1466.64	1970.05	26762.1	11254.1	18014	21010.8	27355.2	23329.1	12408.3	26955.8	16308.8	9755.78	12605.1	6363.89	6205.77	7067.01
1	28	21	27A24	CD078088	659.751	1095.31	690.199	543.723	637.173	698.299	835.987	1209.04	844.181	487.452	546.136	687.222	7658.4	10629.7	5197.69	8840.49	9607.97	5164.85	4955.66	3431.4	5311.15	5175.57	4397.16	6124.83	1223.37	1298.88	2019.08	385.08	378.386	503.275	21945.5	9581.05	12931.3	10055.3	14720.3	13514	6388.78	15303.4	8108.46	8465.6	9729.49	4549.68	509.495	471.238
1	1	22	20M24	BLANK48	126.145	125.904	256.425	37.7854	337.634	117.126	131.543	144.017	92.7248	85.1759	134.513	93.6308	133.496	70.8341	124.101	103.834	116.272	115.354	136.122	182.964	134.163	128.003	194.994	141.622	30.1191	27.1103	100.809	127.535	158.59	129.277	68.4837	58.4971	118.837	692.84	427.444	780.364	123.296	167.348	161.008	199.077	171.11	118.147	50.3064	126.937
1	2	22	21A12	AA917188	746.2	548.647	953.701	311.776	590.752	430.707	587.388	1049.94	518.76	1813.28	2458.04	1614.59	801.732	518.579	458.287	1321.51	755.214	628.096	748.853	343.778	964.253	406.37	560.626	590.953	1922.4	1076.28	801.384	841.393	1122.88	1116.72	641.711	553.056	727.119	731.684	909.083	906.452	864.635	1307.75	1141.17	765.356	785.416	2136.07	278.297	326.604
1	3	22	21000000000000	AI395019	10454.4	13161.5	14432.2	19460.7	22726.3	47321.2	46343	41759.8	33694.6	10263.8	12237.9	10326.6	45509.9	26892.8	16131.8	50192.3	34035.1	36634.4	36172.3	31917.8	42607.2	34191.5	33070.3	45624.1	40637.3	31567.6	35473.9	16262.4	11826.2	14317.4	41884.3	33196.3	42728.7	25425.2	33195.1	34016.7	38782.3	52437.9	45458.5	39251.5	34248.8	20812.7	26610	32778.9
1	4	22	21I12	AI976692	2419.71	2819.34	3132.32	3210.31	4302.69	6187.63	14703.9	12703.9	8023.06	3059.84	3929	3515.24	10205.9	3143.85	1608.37	5911.23	5087.1	4007.77	6097.71	4418.4	8563.84	9225.48	7985.43	10734.2	6055.88	5298.49	5249.19	5946.72	4638	4810.81	11046	6918.87	11605	4011.91	5035.78	5251.16	8011.65	10688.2	9506.51	5534.07	5730.96	6135.06	4212.39	4842.1
1	5	22	96I12	SPOTTINGBUFFER_I_12	66.5382	20.3761	61.9278	138.824	294.186	108.327	44.625	43.4524	227.667	46.4139	195.533	13.9787	76.8766	45.4791	144.707	89.9292	118.369	82.3259	42.1593	72.5144	43.5636	74.4287	19.0997	31.2506	15.1043	124.284	168.122	47.5964	180.671	14.1335	52.4842	116.432	91.6888	122.039	59.2445	36.0743	47.5832	21.7546	124.587	62.8049	50.1378	48.973	54.0897	80.2009
1	6	22	21M12	CD059268	935.377	644.275	1026.82	486.577	630.95	594.219	753.93	1517.42	758.647	2329.66	2606.41	2358.37	1027.73	744.993	610.006	1705.6	1312.53	1009.24	1203.26	625.367	1732.14	695.407	1064.44	1394.02	2544.87	1481.54	1265.63	1177.95	1447	1581.65	1167.71	812.359	1128.54	1078.35	1419.75	1332.46	1073.01	2201.35	1552.53	1228.69	1237.55	2009.69	649.95	614.503
1	7	22	21A24	AA958298	7703.01	10822.6	10622.3	28113	34346.9	59148	44081.9	40382.7	34095.2	9333.11	10829.7	11283.7	55385	44555	36211.8	103884	71868.8	63967.4	60540.3	53141.4	54595.3	53492.2	48810.7	54302.8	72176.4	62384.9	67539.9	18530.9	14263	20080.3	42054.3	35702.8	55445.6	19068	22746.7	20349.9	55437.6	78701	77715.6	36977	41975	36808.6	19457.7	20917.1
1	8	22	2.1e+25	AI395513	3708.81	4728.99	4345.04	7960.27	9875.92	13449.5	27336.7	25926.1	21744.6	3405.37	4045.53	4234.13	19116.5	7123.49	3906.75	19163.8	14148.3	11177.4	9572.06	8356.86	15681.5	18984.2	18535.2	24870.9	10343.7	10288.2	10429.3	3998.94	3147.23	4289.67	39656.8	21594.3	28557.9	3308.13	4975.86	4231.86	18240.7	26393.4	17910.2	6245.03	5918.13	6530.12	11372.8	13064.3
1	9	22	21I24	AI977430	3702.76	3914.11	5698.61	716.839	800.25	1070.67	1008.35	1713.41	1211	6815.32	8125.33	6716.62	1511.99	1073.09	551.395	2397.48	1841.07	1789.89	1197	671.66	1717.99	842.294	1419.07	1663.89	1961.32	926.8	689.761	468.775	795.434	571.244	776.587	672.391	1032.7	674.553	1128.38	863.525	558.54	754.805	611.736	700.02	644.08	1163.35	273.627	289.201
1	10	22	21M24	CD059525	781.966	1278.03	804.377	275.613	463.331	409.123	253.458	921.384	618.749	3123.24	3214.82	4313.72	457.735	628.378	374.427	1035.84	617.015	431.974	629.033	271.271	382.449	498.335	613.816	608.426	963.339	369.459	526.643	254.721	506.38	296.865	1218.77	665.96	959.2	4246.93	5005.67	4109.61	1581.76	2499.48	2116.49	675.679	833.96	1175.04	3453.31	3714.02
1	11	22	22A12	CD060827	2263.68	3493.67	2833.94	788.482	957.038	1254.11	3107	4090.67	3047.42	976.183	1052.43	812.483	2684.67	1619.83	746.514	2218.52	1897.78	1540.93	3429.98	2248.22	4469.02	3654.9	4014.82	5150.82	2834.51	1753.92	2260.35	761.117	961.991	1050.5	13447.9	5753.25	9436.53	12024.2	17131.3	14895.2	6304.68	11015.6	7815.16	6064.71	5996.46	3931.48	5174.03	5218.19
1	12	22	22000000000000	CD061569	3124.35	3324.05	4031.74	1274.29	1331.07	2137.26	2402.59	3037.61	2295.26	6055.24	6860.07	6814.95	9522.63	4668.93	2203.04	5604.29	5139.69	3884.67	4394.41	3496.84	6151.19	7033.32	8693.99	10900	11778.1	10774.8	13543.6	35876	31282.9	36677.2	41348.6	33209.9	55497.2	76908.6	74527.5	61466.2	65390	79151.1	77069.1	53378.1	55012.8	51067.7	58872.7	49425.4
1	13	22	22I12	CD062245	274.57	377.458	344.632	101.678	161.475	127.307	121.817	476.519	285.134	224.173	265.778	242.619	217.457	186.15	288.194	234.69	149.594	99.8512	158.793	108.69	131.088	161.478	252.846	180.925	211.661	116.04	97.3328	124.168	79.0857	86.5468	414.656	232.795	264.894	152.891	238.227	1403.9	277.445	371.183	332.049	107.708	177.887	339.844	176.071	127.634
1	14	22	22M12	CD063190	4355.53	7208.57	5283.92	11036.9	13781	22847.3	19056.1	21991.1	18857.7	8247.72	8263.52	10287.4	52567.6	48947.6	34698.3	19626.9	15168.4	12438.1	22114.2	16577.5	24974.5	17559.5	18491.3	24335.6	19518.5	14630.2	19809.3	9780.67	7742.96	10669.8	45619.9	33351.1	50049.6	28142.7	44012.4	33214.5	47057.8	65890.5	67284.6	26918.2	32439.3	38371.4	60734.1	52187.1
1	15	22	22A24	CD060913	841.258	1289.6	1080.2	123.878	164.167	256.375	253.889	546.037	369.912	392.312	441.173	577.706	385.186	416.558	243.546	1191.63	886.218	562.872	1148.45	767.599	1256.09	1515.67	1763.09	2160.2	644.913	516.092	507.388	1157.52	907.577	1217.22	4883.38	2260.05	3923.92	2405.11	3026.5	2782.18	1426.46	2016.5	1383.73	2138.78	3022.26	1809.01	400.039	336.51
1	16	22	2.2e+25	CD061699	1847	2405.25	2131.1	7688.77	9884.85	12762.8	23871.5	27576.2	20237.3	3372.7	3634.06	4675	20343.3	14456.4	7468.01	9849.75	9421.29	5833.35	17271.2	14971.9	20109.9	23442.4	23405.8	28209.9	9261.18	8138.66	11366.7	1920.6	1535.07	1905.02	46091.4	26854.5	42104.8	11333.3	16454.2	12106.2	31399.3	53716.1	35227.7	9680.79	12527.8	15498	7108.17	8001.12
1	17	22	22I24	CD062490	1423.22	2147.72	1709.79	156.997	216.269	215.603	268.964	468.162	405.106	919.206	1155.63	1073.59	246.445	188.813	162.46	821.658	549.324	390.13	502.925	302.428	572.165	470.992	563.134	615.246	408.062	219.064	205.023	397.049	339.714	577.239	1152.91	544.208	847.554	284.304	247.627	208.901	294.164	395.184	350.461	313.251	298.782	403.168	253.266	222.632
1	18	22	22M24	CD063281	891.923	1198.54	992.412	887.226	1051.09	1226.47	871.632	1442.69	1043.5	740.137	828.301	815.169	892.261	1035.23	579.376	1944.09	1673.11	1079.58	1698.48	1349.17	1935.78	1534.9	1406.33	1733.57	1792.37	1604.75	1873.8	730.038	873.693	755.917	1649.16	877.155	1846.14	1609.26	2242.82	2104.98	1388.53	1638.53	1672.96	915.404	1144.34	947.9	976.497	1206.81
1	19	22	23A12	CD063967	1369.89	1228.16	1805.42	814.838	1080.19	1245.56	1248.51	1647.99	1449.22	2294.37	2955.96	2802.86	1212.11	1283.92	889.898	1893.36	2098.25	1488.26	2067.35	1117.84	2616.52	1149.96	1409.87	1462.83	2778.43	1938.99	1711.02	1380.45	2415.88	2126.47	1443.72	1183.63	1826.91	1536.08	1525.88	1195.07	1904.87	2426.87	2528.76	2112.31	2027.71	3388.23	1000.52	1306.88
1	20	22	23000000000000	CD064701	4124.33	4308.93	6132.43	3320.98	4299.94	5959.55	1702	3360.8	1974.63	24002.8	29651.6	26042.1	4004.09	3853.77	1932.61	3418.55	3429.43	3047.32	3618.87	1876.55	4722.18	4336.88	4521.32	5926.43	6116.78	3046.25	2384.22	2130.04	4275.23	3802.52	1263.81	1355.16	2191.68	1484.37	1716.78	1628.65	1650.17	2401.95	3037.92	3146.23	3029.15	3354.65	1115.47	1126.79
1	21	22	23I12	CD065387	79232.7	93068.2	90050.3	3525.35	3000.96	3626.4	25369.6	44849.1	32453.2	42785.8	46906	51324.8	68163.4	56473.5	56054.9	65564.1	62520.9	54059.6	58270.1	56283	57707.5	55647.3	57049.7	61473.5	60056.4	51929.5	39689	1139.37	929.591	1452.35	2780.48	2049.34	2405.92	1262.39	2414.8	1874.86	2024.74	1841.11	1864.84	1764.33	1680.6	2392.52	1228.28	1323.48
1	22	22	23M12	CD066417	359.676	474.331	317.937	154.464	254.647	219.838	552.165	734.478	384.16	555.157	620.627	870.102	850.782	530.293	461.673	456.109	378.365	200.342	236.709	154.024	192.096	187.142	238.731	209.762	118.758	224.292	142.109	96.4057	114.107	123.367	1825.95	689.862	1435.8	1171.65	1414.11	1110.94	343.267	623.369	407.854	251.158	244.056	124.242	102.62	86.2325
1	23	22	23A24	CD064055	378.08	830.981	772.884	178.455	249.938	227.426	209.818	304.399	190.768	897.537	1123.87	1155.05	203.805	227.039	147.696	721.701	366.851	460.595	408.523	258.324	427.1	231.958	291.211	277.815	659.403	381.676	149.798	209.677	312.048	280.678	272.005	207.444	325.121	315.352	321.164	369.021	158.412	262.072	394.174	325.586	317.941	439.512	152.343	161.696
1	24	22	2.3e+25	CD064768	384.985	797.718	527.253	140.67	221.995	242.138	177.941	257.538	172.527	401.941	454.588	550.898	146.561	148.183	153.36	398.419	271.061	231.718	275.272	139.687	197.896	221.916	200.85	186.287	243.866	187.523	112.638	90.7159	207.275	184.817	177.638	142.901	125.298	250.911	222.269	186.018	106.951	174.583	192.3	114.423	158.986	259.509	116.145	137.033
1	25	22	23I24	CD065490	1646.77	2874.26	1870.29	5541.76	6512.63	9442.97	8499.11	13717.7	8585.39	915.26	950.725	1012.96	8213.46	7999.83	4392.12	11772.6	11541.9	7536.45	7583.56	4978.79	9384.84	9106.77	8418.2	12151.4	4194.07	4201.75	6659.21	664.965	642.345	885.767	14757.8	6476.34	10532.3	3131.38	3907.28	3852.21	4035.15	7588.37	4820.76	2680.7	2936.2	1215.44	6035.27	6719.44
1	26	22	23M24	CD066475	482.373	1174.33	738.003	112.896	239.775	202.692	197.524	263.665	144.456	1569.92	1464.75	1886.2	82.9176	180.883	129.567	397.981	371.477	277.134	334.912	209.577	242.979	200.154	232.458	296.4	203.001	158.019	122.829	96.2978	151.453	121.883	342.562	105.088	237.246	216.684	139.936	130.912	127.878	183.143	227.116	100.784	153.92	158.291	167.563	119.326
1	27	22	24A12	CD066981	1310.93	2350.33	1606.28	553.786	648.388	952.458	508.223	878.469	551.712	506.209	557.592	616.64	1534.11	1768.37	873.374	2169.94	1947.26	1389.23	1426.07	976.761	1543.38	1248.37	1335.92	1819.96	555.975	361.242	334.633	206.121	245.145	250.953	1321.87	691.835	982.707	2260.35	3073.58	2852.75	250.63	404.76	532.516	522.03	444.777	299.634	285.183	390.073
1	28	22	24000000000000	CD067612	1100.7	1459.85	1082.56	3718.13	4878.61	4636.58	8431.2	9205.99	5402.6	1599.66	1460.32	1946.76	2391.9	2192.47	1402.14	1988.09	2523.36	1350.81	5212.16	4831.16	6058.87	8837.84	6965.72	9923.03	2303.86	2971.8	4852.43	5269.02	3054.49	5831.45	32557	13350.6	20342.8	22806.2	33820.9	27600.5	11569.1	20796.2	10336.4	22677.5	32477.6	11761.4	4111.2	5734.2
1	1	23	1.7e+25	Contig6753	4847.33	5303.32	5775.99	16349.5	20092.4	25767.7	44395.6	41301.4	32169	9668.84	11002.6	9975.25	58029.9	44944.8	40663	87695.9	60548.1	60235.5	41686.1	38019	56560.5	49850.1	40866.1	49118	48748.9	44268.6	49626.4	9319.88	6298.02	7554	40599.2	26056.3	21634.2	16725.6	16705.6	20017.3	49240.9	61149.5	44511.8	22065.2	17151.4	10290.4	11876.4	13458.7
1	2	23	17I24	Contig6776	1069.51	1226.31	1486.13	605.968	873.17	829.773	3719.01	3123.29	2030.36	658.574	887.991	707.276	1177.13	383.964	315.286	2313.88	1765.56	1203.89	2363.61	2448.86	4821.4	4020.49	4001.17	5552.92	2353.45	1709.24	1775.19	2355.56	1664.78	1843.77	7407.54	4195.12	4151.06	1726.44	1563.8	2127.71	2547.49	3128.42	2257.1	1232.7	1075.7	1033.17	537.038	625.152
1	3	23	17M24	Contig6799	3394.11	5137.67	5013.96	5241.38	7409.5	11490.8	23098.1	21871.2	18034.6	7339.17	8779.15	7148.61	18415.4	5540.17	3037.89	21813.5	12030.3	12076	22473.7	18303.7	38080.2	28745	30630.3	42042.5	40104.2	28718	29935.6	10921.1	7793.18	9934.04	49097.3	32037.1	44580.6	23246.9	26552.9	30182.1	39308.5	60658.7	54638.1	26036.8	22200.1	19617.4	17097.8	17931.3
1	4	23	18A12	Contig722	4925.71	5447.8	5758.98	7953.24	11728.5	18580.8	21515.7	24026.3	17006.5	12429.8	15735.2	15057.7	39789.2	27760	18780.5	59990.5	39879	39940.5	30370.8	24200.5	39700.2	19792.5	18828.6	25839.5	21942	17205.2	18851	21372.2	15161.4	19945.5	33174.9	14262.2	23849.7	13960.2	15685.9	16953	13148.4	18590.4	15016.8	11607.5	10847.1	6787.77	8284.11	10290.2
1	5	23	18000000000000	Contig746	2281.87	2828.35	2794.03	4046.34	5428.75	7063.82	22321.8	22176.8	16834.5	4938.44	6175.94	6470.66	17183	4795.38	2835.22	12950.8	9008.01	6639.61	9838.42	8587.08	16615.5	17191.1	15947.1	21590.9	9505.92	7564.94	8095.97	11423.3	8090.1	10977.5	41785.2	21563.8	28683.7	17562.2	19606.5	20893.8	18686	23907.8	20018.9	17480.6	18470.9	12687.3	8129.55	9795
1	6	23	18I12	Contig768	281.011	467.336	392.294	137.178	251.885	157.124	149.147	320.878	217.089	2431.75	2775.91	2219.99	203.338	185.345	137.033	440.585	206.024	198.363	231.99	134.675	179.921	153.485	217.551	232.954	503.97	224.475	146.943	119.348	198.456	211.684	309.662	188.854	197.574	212.155	203.061	227.144	87.5762	237.816	308.703	122.448	146.518	467.57	177.45	90.4369
1	7	23	18M12	Contig79	104.249	42.6906	55.9081	75.74	38.6589	70.0681	127.725	14.6973	51.824	105.867	373.338	127.866	63.562	62.3319	138.803	84.9468	99.9214	79.1149	49.2841	159.791	51.8888	38.8216	37.9001	18.887	46.7688	396.116	101.261	35.0002	63.0044	72.6962	11.736	30.5303	35.4938	100.622	8.70888	156.127	157.157	60.3564	60.9878	108.018	58.8794	87.2307	75.1119	45.8381
1	8	23	18A24	Contig729	15735.6	21294.2	22011.6	286.258	150.637	272.415	121.386	209.427	119.95	431.829	536.357	466.947	125.574	121.654	83.1601	230.379	188.292	110.688	188.233	158.889	247.98	122.414	180.139	232.843	90.8119	192.248	129.852	90.3425	99.5315	89.4084	181.764	67.9602	99.4385	1745.02	2210.28	2111.51	8299.94	10974.7	7482.94	399.98	396.133	388.036	3304.49	3729.23
1	9	23	1.8e+25	Contig751	74768	81177.1	84376.4	822.105	655.217	1408.54	3574.78	5195.93	3975.11	7753.13	10193.1	8494.77	23631.4	16418.4	9551.47	20783.3	19272.5	22471.9	5751.48	6551.68	8404.54	12910.9	10716.8	13772.9	6530.28	5817.87	4790.35	454.548	522.425	837.492	1099.66	1499.61	1142.07	595.076	1514.44	942.932	1090.24	1115.94	954.616	753.922	654.363	686.459	448.382	580.311
1	10	23	18I24	Contig773	16581.1	20229.2	22504.9	53950.1	66768.3	77596.8	83064.1	99937.9	92886.6	33630	40143.3	36946	9780.59	5102.98	2052.57	6678.01	5160.63	4164.85	4600.68	2937.02	6218.15	4707.11	5632.25	7417.47	3150.49	2227.53	2414.74	3066.85	2312.03	3048.26	10157.4	4504.65	7083.72	2436.93	4297.58	4220.75	6512.84	9478.13	7097.75	2723.41	2995.94	2774.58	2670.01	3263.4
1	11	23	18M24	Contig795	3122.04	3540.23	3783.63	1627.91	1844.89	2677.15	1285.35	2225.24	1723.78	4533.99	5988.83	5003	1468.71	1233.53	873.311	2948.59	1800.6	1755.47	2088.52	948.613	2445.05	1179.34	1620.48	1883	3740.47	2117.79	1700.7	1303.32	2385.85	2162.49	1203.98	1184.97	1685.68	1493.11	1605.51	1844.8	1521.75	2495.57	2898.18	1835.78	1739.89	3635.47	1352.19	1362.78
1	12	23	emp	emp	115.895	81.832	58.4707	53.2609	102.987	38.2629	69.3945	9.34416	105.19	125.402	80.158	32.5146	98.4604	25.1557	113.659	85.5236	24.636	52.1874	55.4496	97.8726	103.189	29.9066	88.7809	15.1671	56.1162	118.595	22.6669	34.9683	105.887	110.63	16.845	44.3903	4.9007	34.2109	37.8164	2003.67	8.70651	5.62233	14.8441	74.3128	37.247	44.2096	147.548	84.0893
1	13	23	19A12	SCMNPK	46932.8	56464.6	59461.3	64742.3	79465.7	92403.2	44419.8	42592.8	42682.3	11336.8	12249.5	13649.8	78941.9	50188.1	51574.5	82782.6	69883.2	57616.2	71069.5	63973.2	54770	55345.6	49727	53145.7	63852.5	56606.3	65863.3	22632	16431.4	25395.4	48705.3	36834.5	60148.2	72663	62539.7	55324.7	57877.3	68518.4	78820.2	57656.9	59706.5	57677.7	28470.2	32135.1
1	14	23	19000000000000	SCMRSRLF	92665.4	77610.6	77023.3	3381	3498.98	5170.92	10495.1	17059	13550.3	7981.54	11408.8	9895.19	25493.8	11843.3	5224.82	22629	25941.9	23933.5	12467.3	7920.59	19619.1	16361.9	20355.9	25448.1	8504.3	7279.46	5543.13	3073.77	3152.57	4370.26	12161.9	7632.74	10924.9	3805.76	8119.15	6961.39	6297.51	6419.8	6364.62	5150.2	4680.26	4870.93	3322.71	4970.79
1	15	23	19I12	SCMSMOXII	288.425	530.452	576.653	106.341	246.92	223.438	147.986	400.952	239.127	1019.1	1016.9	1105.72	225.587	222.519	187.721	2447.73	2112.86	1357.86	1121.33	786.097	1488.74	1355.15	1600.94	2086.39	696.061	566.838	741.447	695.874	429.502	759.127	6062.65	2786.75	4600.77	1165.4	1286.8	1434.86	901.422	1865.61	1366.97	700.538	893.557	938.014	160.586	222.236
1	16	23	19M12	SEG_SCMEXGPX0	3757.17	5225.24	4402.39	6607.37	7274.21	12471.1	6246.19	7370.7	6313.05	3379.59	3515.77	4110.8	25748.9	15546.1	7416.87	21761.1	18156.5	14432.8	8849.67	6055.08	9733.43	6573.66	7728.34	8970.77	6520.33	4546.38	5606.13	5398.79	4097.58	5809.91	11263.3	5601.15	8497.14	2171.29	3277.98	3077.22	5089.33	7825.6	5923.06	3819.78	4928.14	4594.8	8108.24	8935.08
1	17	23	19A24	SCMPMY	6810.51	8463.38	7462.17	1486.19	1923.1	2643.29	7801.01	8592.25	7349.42	4493.17	4841.7	6747.63	11891.9	7851.33	4237.67	12308.2	10398.9	7299.32	10396.8	9403.2	14721.9	21663.2	21872	26668.1	5604.05	5488.08	8624.41	25635.6	22672.8	27564.2	43391.4	32456.4	51257.7	60072.1	73335	52438.1	39474.6	57310.5	42491.5	32915.4	43927.7	44343.8	3502.55	4069.77
1	18	23	1.9e+25	SCMSGTPI03	40316.6	39971.1	37769.7	68220.4	84520.6	78732.2	56836.6	52348.5	50296	42119.9	46854.7	51349.6	60019.8	50663.4	50891	82476	63920.8	51709.8	58488.7	54076.1	52414.6	52525.6	52850.9	57995.1	64513.5	62497	67728.2	50876.8	59283.6	49659	58890.6	40272.8	59983.1	96986.4	64226.3	72364.3	65610.1	67166	73957.5	74832.9	67027.5	59321.5	66950.8	64904.8
1	19	23	19I24	SCMSOD2	3188.05	5622.54	3892.04	281.925	223.784	262.715	283.758	723.278	468.335	1332.95	1563.61	1630.13	837.266	757.284	486.654	1513.14	1541.32	839.628	598.788	429.392	688.331	765.522	986.961	1111.71	703.891	412.044	480.964	187.454	228.003	234.062	1359.2	601.207	1240.84	73649	66047.4	60808.8	74704.8	68371	76846.7	2331.8	2788.8	3406.8	92172.5	97705.9
1	20	23	19M24	SEG_SMHMGRED	1283.31	1514.75	1424.77	125.16	162.272	132.039	133.006	219.406	159.148	571.718	636.918	611.577	119.638	160.822	128.414	496.241	191.395	114.172	177.422	162.703	190.287	186.531	251.648	196.446	213.311	217.508	391.915	84.8713	173.345	153.719	263.975	129.404	159.436	157.674	266.19	197.32	220.948	264.472	246.113	87.17	119.302	185.443	332.581	136.827
1	21	23	20A12	Contig5568	3581.04	4324.42	4241.18	6518.58	7705.48	9440.58	5402.59	7805.45	5886.49	5226.43	6220.06	6108.96	7885.76	7773.7	6734.24	9251.14	9165.85	7611.01	7344.96	5637.21	9004.35	7371.51	6515.65	7701.53	11143.6	8202.46	7704.03	4447.86	6029.59	5090.41	8056.96	5457.33	10025	3745.82	4680.05	4709.2	8300.5	10951.7	10562.1	5695.99	5615.01	7126.57	5407.76	6480.01
1	22	23	20000000000000	Contig6510	6075.72	10657.3	7187.78	2344.85	2632.02	3814.43	3677.31	4679.41	4008.34	1125.45	1084.3	1160.22	7781.26	8229.07	3432.42	14038.1	13180.1	9005.29	10826.2	8277.74	13130.6	9680.89	8053.14	11673.8	6231.47	6015.38	6423.64	1598.98	1404.89	1414.69	10832.2	4941.66	9446.89	3208.15	5316.55	5285.33	6173.69	9856.4	7474.93	3514.17	3806.08	3459.52	3709	3748.64
1	23	23	20I12	Contig5199	47730.5	71810.3	59576.6	2596.13	3011.91	3616.92	4382.64	7411.6	5672.29	10063.6	10829.7	11786.7	10799.5	9044.9	4094.44	13168.9	13207.2	11385.7	5404.31	4788.83	9190.47	9720.32	8815.68	11728.2	5289.08	4597.84	3663.28	2107.84	2455.33	3105.11	4744.49	3795.97	4963.53	2584.1	3675.69	3571.82	2327.67	3639.93	3695.62	3404.21	3286.72	3494.24	1958.32	2478.39
1	24	23	20M12	BLANK41	71.047	25.1691	148.058	103.971	321.911	199.904	15.112	20.9338	1.89178	291.103	403.013	147.944	50.762	54.9529	129.687	35.8479	86.5757	64.6009	13.4954	7.46468	18.2153	42.5722	40.7152	27.5422	23.1718	183.043	113.279	58.288	204.958	111.106	61.8702	68.9115	135.391	30.8305	14.5347	154.14	38.2756	5.61581	27.7732	99.242	40.7736	76.9581	127.631	204.304
1	25	23	20A24	Contig6017	7122.42	10802.1	9025.61	29095.4	31486.2	41502.7	30504.6	32303	26579.4	8539.12	8131.75	8124.41	21501.2	30005.3	15701.8	37438.2	32410.6	24628	34834.5	27822.8	37516.4	30854	19471.4	29828.4	19977.1	15434.3	19436.2	6336.88	6951.42	7745.59	44792.3	22690.5	33751.9	18273.6	28791.8	24469.8	23774.2	43352.6	28918.7	17713.4	19431.9	16532.9	29098.2	31322.9
1	26	23	95I12	mCD038604	248.954	406.381	325.699	88.133	325.32	252.629	265.193	301.507	186.191	1853.21	1941.45	1982.67	221.825	369.147	241.78	348.64	396.34	246.66	680.036	227.847	550.134	131.604	268.032	232.236	417.777	243.709	265.104	152.209	387.6	406.711	217.741	300.768	411.374	272.476	108.263	238.618	344.298	407.281	329.534	403.832	310.945	338.15	128.766	209.061
1	27	23	2e+25	Contig6743	347.568	400.217	271.125	170.283	210.349	151.376	109.037	163.149	101.176	355.443	514.875	464.838	105.551	244.478	143.04	297.748	272.218	217.911	418.842	169.211	381.44	179.147	303.572	272.189	317.191	264.051	153.976	192.732	189.332	179.759	336.573	154.344	159.95	156.72	180.79	152.73	277.37	215.613	447.358	260.206	274.852	290.057	100.852	189.245
1	28	23	20I24	Contig6920	73280	82424.8	79048.4	35161.6	34476.1	38280.9	29541.7	40947	29783.8	14972.9	16427.3	19085.1	58549.6	55669.9	38981.1	67251.5	62011.2	57330.9	73603	67047.1	73300.4	61819.6	51831.1	63597.2	26940.1	25528.3	24487.5	56825.2	45673.5	65307.7	59709.6	40331.1	39228	93030.8	112285	81281.4	47977.4	56533	39533.6	59608.3	66410.8	60966.6	12473.3	18825.1
1	1	24	14I12	Contig5589	2262.96	3087.17	3019.9	5884.48	6970.89	9964.03	22298.7	19917	15129.9	4923.14	7956.27	6198.22	16199.8	4369.02	2474.76	10013.1	6354.42	5922.4	5002.71	5310.91	9534.7	10150.3	9837.42	12594.2	3924.85	2201.27	2386.65	1326.09	976.873	1309.57	24046.2	15870.6	14943	16650.1	17139.6	19675	5592.73	9046.08	6745.16	5806.7	4932.1	3737.47	4554.53	4772.73
1	2	24	14M12	Contig561	1257.18	1461.81	1474	1260.3	1666.43	1978.08	5525.08	5214.78	3458.15	1709.71	2310.58	2067.09	6343.17	2098.11	1089.19	3390.13	2314.24	1603.54	3227	2653.67	4691.91	5751.41	6186.75	7603.22	3343.84	2497.31	2740.03	3700.22	2305.97	2773.27	15524.3	8869.17	8453.28	4248.8	4471.35	7283.55	3142.73	4921.31	3631.19	3467.64	2323.32	2626.68	2936.73	2790.75
1	3	24	14A24	Contig5547	5655.02	9448.51	8112.98	5787.46	7240.17	9001.53	12206.1	15825.9	11722.9	3867.61	5231.53	3583.26	23220.2	8180.26	4956.44	24522.5	15926.2	15486.1	10386.3	6132.93	12258.1	8180.06	10280.8	13057.4	14457.8	9977.67	7356.92	3988.82	4435.6	4868.61	17119.4	12510.4	15087.5	10063.7	12449.9	13425.3	10743.2	18174.8	16000.7	7493.72	6587.05	13701.1	4527.49	4048.35
1	4	24	1.4e+25	Contig5572	2456.45	2865.99	3256.45	1728.38	2530.9	2821.17	12997.4	11246.1	8800.6	1602.42	2058.91	1388.34	4113.63	1514.71	705.684	3937.99	2700.77	1891.4	3107.18	3010.49	5377.83	4893.23	5216.74	6308.34	1834.18	1237.8	1433.52	1028.3	934.86	1052.98	12677.2	7085.06	6200.09	7739.39	9666.85	10701.9	2916.62	5591.75	3237.71	2809.54	2300.31	2135.27	2125.78	2014.04
1	5	24	14I24	Contig5594	3019.29	3076.37	3923.92	10550.4	12672.4	15110.4	19705.4	21657.5	13980.6	759.128	824.666	714.019	36161.8	19833.7	9425.45	29150.3	22689.4	16966.9	13255.2	13653.6	22851	19076.6	17878.3	23270.1	8296.61	7385.96	8627.04	1024.97	694.671	910.398	26623.8	15889.3	14914.1	13611.5	19649.6	22709.7	10986.1	17028.5	10141.8	17103.8	11900.6	5305.12	5247.12	5465.42
1	6	24	14M24	Contig5615	3346.82	4377.67	4507.19	8900.93	10998.6	16057.9	27436.7	23815	18268.1	3382.88	3719.24	3168.17	26114.6	9751.77	4895.78	23949.5	16212.5	13557.2	14700	13917.9	22988.6	23677.4	25877.8	30043.5	14419	10980.5	12422.8	7613.73	5058.4	6937.58	43767.8	25708.4	37093	15720.5	19111.9	21321	24346.6	41974.6	27687.9	24246	21705.6	17487	16031.3	15276.1
1	7	24	15A12	Contig5894	6195.48	7197.9	8631.67	3483.66	3996.6	5351.12	6412.06	8177.6	6174.55	10780.4	14037.2	9709.79	8638.51	4124.7	2360.59	16989	13282.7	12904.9	9249.33	6300.64	12771.1	8311.9	10943.5	14078.8	7538.91	4715.54	3903.41	2619.48	2822.88	3272.04	14537.8	8681.71	11424.3	8733.82	12274	12467.2	6210.17	9481.21	7660.02	5736.63	5308.65	7016.1	3685.18	3556.59
1	8	24	15000000000000	Contig5915	5313.86	7408.13	8261.55	5863.83	6979.05	11554.3	9018.27	7979.82	5979.02	6807.89	8144.39	6700.97	25366.5	11836.2	5513.09	22074.3	15052.6	13252.3	15434.2	12652.7	21236.1	15993.5	16149.9	21323.6	10738.3	6318.98	8334.1	3649.21	3282.73	4191.67	36145.9	19578.4	24650.3	18679.9	25166.5	24202.3	12683	23017.2	17251.3	13506.2	12199.4	10745.4	6186.68	6159.52
1	9	24	15I12	Contig5938	29331	37310.6	39667.8	44883.9	54456.9	70713	62837.1	55855.4	56286.1	33329	37939.9	35651.6	68587.3	55887.7	51930.5	96341	75935.8	61231.7	71299	68660.3	66081.8	54212.1	56921.7	64116.3	63330.2	61404.8	68552	33578.3	25860.6	38514	58329.8	36789.6	64544.6	40248.8	53497.3	51296	43015.5	64633.7	56295	35036.6	34455.2	23138.8	54577.1	49723.3
1	10	24	15M12	Contig5960	1425.14	1913.32	1848.46	236.947	497.065	304.434	174.67	390.083	311.583	2039.47	2932.08	2253.8	873.6	609.698	349.792	2336.5	1732.26	1343.32	719.209	414.54	743.664	1457.53	1912.23	2180.21	2508.45	1745.94	2334.29	377.325	455.535	393.902	1432.27	707.86	877.396	1009.53	1567.07	1628.62	820.042	1722.67	1451.85	830.858	955.731	1285.63	281.388	220.536
1	11	24	15A24	Contig59	28374.4	41976.3	35666.2	53557.5	74170.3	86487.7	63223.9	67965.7	59373.4	32026.3	37675.9	38042.5	57819	73127.9	52074.7	104774	74095.2	68174.6	68347.9	60409.4	69190.2	58314	63380.7	69704.5	74822.2	65465.3	76593.3	48927.8	51527.5	45093.5	61827.4	48352.5	65071.8	80681.1	63658.3	61892.4	73729.4	68818.5	88193.8	53724.1	52477.1	56202.6	72645.1	55270.8
1	12	24	1.5e+25	Contig5921	57208.9	69523.3	72612.5	1257.06	1249.01	2141.36	4330.47	5719.21	4668.63	3401.12	4242.54	4112.06	9479.98	3915.91	2480.11	7350.3	6717.18	7256.09	2902.19	3394.01	5611.79	6133.21	6336.22	7874.83	3019.47	2350.71	2143.75	1020.24	961.658	1336.64	2841.66	1779.06	3079.35	1419.64	2839.79	2048.85	1566.32	1484.56	1667.82	1276.26	1282.8	1633.68	754.1	1061.03
1	13	24	15I24	Contig5943	30269.7	40359.9	40543.4	59254.2	73253.4	87231.7	60493.6	66795.9	65697.4	42393.5	44167.4	46472.9	62625.5	59174.9	54481.5	83893.7	68252.3	59296.8	67927.2	64543.1	60484.3	54255	55277.4	57890	83455.8	70885.1	68303	51342.9	54895.5	54791.8	62672.7	40322.7	66875	90054.4	70822	64417.3	57431.9	71388.9	74349.3	63627.8	65493.4	59310.4	70287.6	60494.1
1	14	24	15M24	Contig5966	47230.3	49481.3	57818.9	54439	60783.5	77190.5	54255.8	56252.9	54365.7	26627.4	38238.7	28981.6	42840.3	38133.8	21640.5	54602.1	53805.9	44954	45641.9	40923.6	44517.2	48431.7	45094.1	52826.2	40171.1	30181.7	28585.1	24131.9	30819.1	23052.3	45866.1	36374.7	59644.1	50723	93990.8	72745.2	66337	70375.9	77248	36227.9	39997.7	54651.3	64601	63256.7
1	15	24	16A12	Contig6299	1294.62	2033.82	1574.53	167.203	165.669	246.945	258.735	334.308	295.96	917.637	973.456	968	5682.46	2871.79	1584.98	4438.93	3859.96	2401.56	11941.1	10105.4	16398.8	20858.4	20775.3	26560.4	13936.9	12335.8	16648.5	865.967	751.468	813.727	9354.16	4174.88	8374.87	6898.97	9807.85	9504.5	30817.1	44339.2	32246	13961.7	19019.8	18606.6	2417.64	2625.81
1	16	24	16000000000000	Contig635	7150.98	9661.88	7968.21	11811.5	13419.6	21416	19196	21627	17852.3	5975.43	6509.04	8563.75	37902.9	33617	18563.9	47110.1	37168.4	29254.1	33418.1	29907.1	44037.8	39038.1	40643	47935.9	26750	23720.1	33077	16815.2	13772.9	17974.2	43318.5	32953.9	53163.4	13689.2	18891.2	16902.2	23248.3	40302.4	25687	11253.2	15091.5	15607.9	16190.7	17579.9
1	17	24	16I12	Contig6391	10191.5	13843.5	10507.8	51703.9	68536.3	77473.1	74016.8	77663.3	89805	38483	45750.8	49304.2	32160.9	22640.3	17354	20093.2	16763.2	14450.9	24059.6	18672.6	27864.7	35368.6	35259.8	44974.4	43750.2	35978.1	43532.5	10209.1	8259.11	11310.8	42013.6	27885	55306.2	35955.1	48641.4	33944.6	56989.2	76812.2	77696.6	35758.6	49606.2	38397.9	26499.6	31525.8
1	18	24	16M12	Contig6417	84.6131	46.912	177.814	182.796	287.499	383.422	44.8101	111.751	28.1129	1956.66	1734.15	1704.69	56.8469	35.3473	144.905	76.5682	73.5017	66.5141	91.8967	31.8072	78.6698	22.319	55.3877	35.252	50.9385	102.656	43.2683	109.175	49.3322	57.0698	90.7551	102.298	86.0936	33.9057	16.1932	23.523	4.00978	65.4075	124.619	50.78	33.9989	68.9515	77.0901	42.0249
1	19	24	16A24	Contig6308	3009.84	4747.35	3846.68	2081.85	2561.45	3891.08	2502.68	3689.89	2925.24	5148.64	5673.03	6271.51	4440.66	3004.5	1833.57	6020.31	4796.77	4044.86	5971.19	4417.26	7253.63	7861.48	8376.44	10956.5	5599.04	3860.54	5428.61	3792.33	3357.45	4236.9	15166.7	7341.59	11999.6	3708.37	5314.34	4388.41	4346.46	7879.73	5750.9	3612.51	5168.19	5984.7	2368.14	2891.01
1	20	24	emp	emp	127.992	187.177	25.472	108.753	312.368	87.9219	12.965	29.9842	98.9722	185.018	164.099	24.4765	16.3822	75.0838	125.948	105.747	120.685	39.3725	16.7929	56.4726	32.7429	38.3549	68.9442	25.9148	40.6774	87.561	132.817	43.8245	76.143	27.8498	42.9409	86.5886	45.2266	136.495	32.26	16.1825	51.0835	101.501	129.684	133.353	69.3658	67.4936	155.123	83.5305
1	21	24	1.6e+25	Contig6368	6963.88	7853.32	7516.58	27699.7	33231.7	43993.5	41444	35468.5	37537.4	10932.2	10809.5	13139.6	31945.7	37549.8	22300.2	61573.5	53641.3	37579.9	47092.8	53629.9	48789.2	47245.9	38792.6	47258.5	39763.6	39226.5	58318.1	21800.6	17048.2	23436.8	41214.9	33219.3	52078	42639.4	53785.5	52061.8	45550.6	66083.8	53077.9	37323.1	46145.5	25965.4	44213	48941.9
1	22	24	16I24	Contig6398	7422.09	10808.2	8828.1	47978.4	56343.8	68598.7	44521	44581	38590.9	10467.9	10168.7	12136.8	39545	44649.3	28273.8	78993.6	64620.3	51394.1	66754.7	57902.2	54113	45228.8	46857.2	55435	74949.4	58665.2	67603.7	17160.2	12558.2	18976.6	52114.8	39733.2	59760	27962.7	39289.3	32781.5	55320.7	67428.7	66102.1	27500.2	36621.9	36023.1	52094.6	47437.7
1	23	24	16M24	Contig6426	1698.26	3075.92	1871.49	746.692	911.672	1398.58	716.058	1286.27	853.71	1193.43	1639.74	1427.15	1219.8	925.527	565.525	828.523	732.579	486.153	529.308	278.609	514.013	620.378	745.408	916.375	422.321	413.899	776.137	246.767	297.817	314.582	1627.34	739.696	1496.6	957.939	1461.18	1407.04	2358.48	4066.67	2876.61	567.624	996.092	907.905	2757.62	3447.38
1	24	24	17A12	Contig6724	3732.24	6637.62	4389.64	11275.1	14002	17257.1	16184.5	21234.4	12928.3	5775.09	5511.5	8623.73	12996.4	10143.4	7575.26	17508.3	15926.6	11665.2	16142.9	14555.2	17739.4	20644.6	17275.7	22895.9	10216	9483.78	14596.6	11700.1	8321.34	12372	34274.1	12760.7	27584.4	14383.2	19174	13975.8	14356.6	19469.4	12937	5966.26	12190.1	10113	10108.4	14266.9
1	25	24	17000000000000	Contig6748	17500.6	28338.3	17984.2	26778.7	33085.9	44735.8	38746.3	42884.2	40459.5	20824.2	20419.1	29835.3	37900.7	42283.6	35748.6	55577.2	45173.9	39785.8	63199.6	51194.3	53237.3	45850	47038.9	50723.5	47869.4	41040.3	60856.7	42070.5	45507.8	44172.5	52249.3	34101.1	59831.5	40834	54745.8	45833	30897	44321.3	32272.7	45014.4	47375.7	34130.5	31244.1	33751.6
1	26	24	17I12	Contig6770	6024.46	11644.1	7698.29	41943.5	48849.1	65905.1	47613.9	44857.7	40062.7	14501.6	15432.3	17731.5	32940.7	31984	21319.1	52352.6	43969.1	33707.3	47115.8	36285.1	45740.1	41272.1	44169.6	47115.7	37627.1	32889.1	47832.9	11572.3	9047.08	12264.9	46524.3	31771	54491.2	66740.5	61308.7	55024.3	50056.1	68702.1	62777.2	27222.3	43799.9	38709.7	51310.2	49061.8
1	27	24	17M12	Contig6793	6422.78	10576.6	6748.01	12984.7	14739.8	20767	18420.6	24077.9	15618.8	3792.62	4075.91	5462.97	13517.8	12878.4	8888.76	10244.3	9680.47	6644.51	18578.9	14105.1	18164.4	30223.2	24211.5	33625.8	15112	15151.2	22140	10854.3	7604.37	11381.6	38545.5	25844.2	44681.4	25173.3	32739.8	26038.4	50349.1	61362.5	49670.6	21944	35838.5	23179.2	21071.9	25124.6
1	28	24	17A24	Contig673	5072.67	8308.87	6500.99	4299.72	7108.62	7380.98	6945.81	5797.73	4143.03	7988.92	9412.51	9307.62	50231	54374.2	48941.4	99506.3	74770.7	66613.8	74498.9	79101.3	68897.9	69941.4	57643.3	64289.8	81104.5	86180.5	92844.9	87483.4	69595	76076.5	89212.4	47082.4	74159.5	80690.2	84180.2	71092.4	89763.2	75141.8	93224	71398.6	91396.9	89088.8	67066.3	58554.1
1	1	25	10M24	Contig4192	19518.7	25906.2	27910	52752.7	75589.9	78069.8	63256	66941.4	54310	7478.13	9433.18	6558.55	54258	37488.8	17932.7	60294.8	35220.7	38302.2	33212.8	30710.1	53394.1	43920.8	44353.9	48715	60323.1	36088.6	41229.8	6567.35	5135.39	5954.66	55683.7	37898.8	55975.7	29171.5	35080.1	42040.2	18436.1	31955.9	23681.7	39537.5	28241	24162.9	40698	39944.3
1	2	25	11A12	Contig4468	1023.99	1306.6	1208.15	1530.97	1955.4	2981.3	7645.47	8086.77	5961.91	1673.71	2186.57	1980.49	8321.62	1563.59	1047.03	7412.03	4237	4218.48	4620.87	3872.54	8568.46	7171.77	8049.35	10939.2	6033.71	4986.75	4647.44	3686.88	2400.45	2912.24	11457.5	6419.64	7909.78	2763.53	2914.32	3882.85	5846.19	6885.21	6387.46	3248.66	2877.01	2346.43	1527.08	1672.74
1	3	25	11000000000000	Contig4490	1674.43	1950.48	1981.54	5481.68	7467.55	9127.03	19837.4	18627	14284.6	2442.54	3293.76	3085.2	24050.2	6621.02	3741.72	13671.9	8637.88	7662.05	9155.59	9316.27	15153.6	16030.9	15079.4	20431.3	19131.5	14672.9	15189.9	7082.79	4913.59	6754.57	29238.4	16116.9	19949.3	7769.6	8137.81	9521.53	18039.7	26938.5	19269.5	6648.61	6613.52	6933.03	8139.2	9144.76
1	4	25	11I12	Contig4512	3898.09	4763.28	4790.09	3273.9	4536.57	5586.2	3778.27	3969.79	3192.97	4942.49	6338.51	6079.64	24957.2	6991.14	3999.98	38686.9	21194.5	20616.8	13215.2	11471.4	24678.4	23229.6	25625.9	32289	32630.5	25022	28018.2	17494.6	12796.9	16545.4	46761.5	37369.9	50434.2	67348.2	60698.9	61761.3	51708.2	67233.3	62902.9	51698.2	54902.7	34231.5	7805.9	7507.23
1	5	25	11M12	Contig4534	7200.7	8646.25	8904.85	4225.92	5982.37	9936.64	10397.4	11587.6	8085.07	3005.47	4113.79	4338.38	11158.3	2856	1946.35	11179.7	7105.24	6820.72	8008	6644.2	12327.2	9880.7	10466.4	14977.3	10013.2	7109.33	6878.53	5274.88	3953.24	5647.42	19758.9	9870.11	15816.2	9773.04	10741.4	11731.3	5123.38	7923.68	5929.7	4688.45	5083.78	3325.2	3658.5	3694.83
1	6	25	11A24	Contig4473	802.423	866.8	1112.18	983.345	1475.38	1582.15	2662.18	2482.87	1731.59	1276.3	1813.5	1279.02	4593.46	1373.04	780.323	5121.17	3267.78	2478.95	3698.26	3631.84	6053.07	5834.28	6098.34	7916.09	2439.9	1847.29	2559.09	781.482	680.155	873.787	7949.33	4205.29	4732.69	3575.84	4295.7	4583	3330.76	5639.55	3475.09	3943.83	3753.75	1746.34	1202.41	1353.09
1	7	25	1.1e+25	Contig4496	3027.15	3256.31	3630.04	2755.61	3499.74	4387.11	14306.5	12597.5	8785.55	3941.33	4459	4752.33	14366	4626.44	2569.22	8091.63	6202.85	3755.32	9453.18	7819.09	14537.3	16417.1	16243	20468.6	7775.61	6857.76	8141.68	6280.04	4379.8	6417	34313.7	18265.5	25867.6	6005	7245.14	8426.47	20439.4	26669.8	18559.3	8507.26	9091.87	7653.02	2844.34	3116.52
1	8	25	11I24	Contig4518	2798.86	3830.63	3602.42	853.946	1066.34	1660.55	2076.59	2289.91	1450.94	1231.09	1479.44	1561.71	7287.28	2795.9	1469.69	2021.99	1563.71	1189.42	1952.81	1630.85	2640.09	4018.43	4419.62	5537.24	5521.45	3940.81	4891.36	4034.1	3239.41	4947.92	15467.9	7400.41	11626.8	7991.17	9502.82	9126.54	10873	15606.8	11420.1	6282.11	7075.64	7868.37	4901.09	5602.24
1	9	25	11M24	Contig454	2571.32	2986.92	2898.75	4391.71	4717.57	6584.69	16316.9	15076.4	12162.5	1823.5	2076.61	2707.84	5272.64	1875.32	1031.47	2609.4	2184.93	1297.24	4137.7	3063.26	6884.72	8402	9360.1	11645	6373.85	4741.16	6183.69	4345.22	3323.63	4951.79	23225.7	11589.9	19104.9	4957.08	6788.51	7768.5	11581.7	18010.4	12340.9	7726.7	9356.28	9532.29	3727.21	4777.71
1	10	25	12A12	Contig4819	221.426	164.978	57.2828	83.0069	56.1579	113.116	93.4772	462.372	273.977	603.896	527.293	498.202	24.6381	119.822	174.199	223.193	147.047	57.4163	177.45	25.5812	13.8152	75.9289	197.533	96.7584	199.898	65.2424	34.3298	43.9171	86.5743	61.1253	33.1454	227.333	72.1762	35.8	133.724	29.0797	15.4311	6.86143	294.12	28.9203	98.5645	220.603	78.4318	101.159
1	11	25	12000000000000	Contig4841	2192.11	2286.59	2499.1	713.957	871.901	1089.08	337.503	493.338	384.441	720.124	748.633	855.756	306.571	133.891	115.932	510.885	279.037	170.751	206.288	137.306	276.943	180.354	263.978	292.552	277.798	168.759	156.696	76.0914	140.087	147.728	199.476	126.534	171.073	53.2661	144.259	195.776	120.758	282.714	289.826	149.296	145.491	193.172	111.594	131.896
1	12	25	12I12	Contig4863	308.627	237.832	256.724	379.107	206.226	620.006	449.271	694.109	414.093	1641.2	2056.93	1699.19	636.715	298.005	303.919	747.05	873.687	638.551	949.922	606.79	1334.86	499.255	762.567	874.048	1072.55	769.428	688.305	782.164	924.426	825.186	314.141	305.853	733.109	714.929	747.426	698.926	676.727	657.971	700.951	1362.9	944.096	591.286	260.159	376.442
1	13	25	12M12	Contig4885	130.593	241.271	245.346	121.193	570.073	91.9092	164.251	200.211	106.908	1216.18	1300.05	1251.15	209.646	285.013	238.345	368.913	339.529	304.519	370.568	1535.05	370.501	39.1284	346.025	160.848	606.651	427.785	207.934	486.545	703.398	638.694	54.2962	180.344	298.86	345.058	131.724	328.586	171.35	332.059	329.067	436.665	359.135	761.046	93.5204	179.883
1	14	25	12A24	Contig4825	2621.98	4062.61	3758.44	2431.04	2776.53	3491.67	2260.74	4002.55	2737.05	9019.03	10033.9	9065.19	2864.63	3931.59	2253.29	6529.36	5659.26	4199.84	6653.21	3081.53	5393.75	2273.39	3362.13	3255.5	10482.3	5847.66	4645.14	3810.4	6110.35	4725.89	2718.34	2653.62	4081.92	3355.63	4411.13	4207.25	3132.58	5733.85	6236.14	4752.21	5497.7	8689.22	2542.3	2356.61
1	15	25	1.2e+25	Contig4847	113.672	106.589	185.753	208.234	136.358	224.161	203.15	315.753	97.3166	1444.1	1470.94	1467.1	190.694	144.389	177.116	368.724	184.075	178.155	175.107	113.561	274.089	17.9004	211.704	79.3269	376.686	302.984	86.737	150.163	267.214	295.534	137.088	160.135	203.736	181.265	108.106	217.07	178.995	174.571	374.785	313.952	288.518	298.307	67.1121	186.404
1	16	25	12I24	Contig4869	1109.6	1269.42	1118.81	614.197	582.383	704.523	1275.09	1637.44	1165.05	1099.7	997.344	1473.29	253.781	148.204	142.418	564.38	459.352	233.893	92.6709	79.5607	128.392	880.068	1032.31	1276.66	651.636	698.711	934.204	539.794	459.333	571.571	8973.26	4619.81	7559.11	3390.64	4427.16	5374.87	4138.32	5648.6	3810.17	2781.32	3086.21	1585.83	549.488	680.997
1	17	25	12M24	Contig4890	349.985	591.223	611.182	418.412	521.257	624.704	382.006	985.81	771.513	1295.23	1442.38	1430.05	321.145	565.687	447.223	784.367	585.84	327.133	645.937	262.444	398.52	409.947	576.083	426.241	886.54	565.872	339.699	404.913	574.065	559.882	637.653	438.536	557.79	473.677	462.668	395.771	372.549	680.893	656.118	562.401	589.023	1874.59	268.741	243.855
1	18	25	9.5e+25	mCA038520	811.025	759.523	1342.33	166.181	321.641	400.716	252.504	380.477	316.832	1721.07	1710.8	1696.39	461.299	621.373	406.346	909.174	749.257	702.851	1059.92	591.157	1397.77	411.244	447.405	552.145	1332.9	811.817	772.241	636.152	1220.11	961.569	498.103	440.023	645.416	565.342	568.094	424.478	332.566	1074.93	654.796	824.2	674.404	777.699	322.114	402.138
1	19	25	13A12	Contig5192	424.166	539.163	583.407	505.596	533.787	844.622	503.567	1245.58	649.303	2268.57	2777.26	2476.23	436.963	704.097	586.295	635.001	662.072	396.957	822.205	358.722	488.933	462.374	478.078	389.495	1139.01	568.457	389.989	475.837	718.915	469.809	664.91	564.231	702.886	629.126	740.065	605.698	512.505	845.699	930.979	636.365	614.532	1841.28	330.996	293.955
1	20	25	13000000000000	Contig5214	2962.77	4360.85	3585.53	3617.44	3972.22	7479.27	7578.73	9380.66	7576.72	717.22	789.734	929.427	19099.4	14151.9	7008.06	15414.1	12295.1	9637.82	20296.5	15010.7	23879.4	18359.8	18069.6	25657	14829.6	12980.8	19975.3	2869.17	1828.9	3145.65	20387.5	9139.78	15827.8	4747.4	7594.17	7321.88	5313.21	9499.25	6649.43	5519.02	6641.82	3031.29	3791.89	4375.15
1	21	25	13I12	Contig5236	513.021	850.479	536.025	169.235	371.022	355.622	277.938	386.317	241.165	275.43	383.772	357.076	704.925	404.456	194.601	916.331	1007.64	429.933	720.891	363.837	862.112	699.704	1003.44	1248.37	390.333	333.144	578.238	350.684	315.727	396.175	1226.29	596.04	759.464	249.107	243.237	435.114	195.493	499.561	306.002	564.374	689.279	305.544	319.956	298.486
1	22	25	13M12	Contig5259	2045.1	3088.76	2079.06	7070.33	7465.86	12212.4	7989.29	11635.4	8029.42	1772.37	2028.17	2362.57	12671	10271.3	6216.08	13074.9	11932.5	7052.04	14246.1	9059.54	15875.4	15613.3	15265.1	20745.7	4583.46	4239.28	6149.37	1529.14	1101.85	1631.15	30452.7	11910.7	26297.8	21411.9	29048.8	25864.2	13536.1	22202.1	15261.8	7629.87	10977.9	7468.13	4413.26	5380.17
1	23	25	13A24	BLANK134	89.4076	80.6808	168.158	119.479	385.085	45.5347	48.529	14.8462	75.8827	105.302	431.524	51.3487	73.1996	55.9317	193.417	200.736	150.355	44.6872	101.642	176.368	123.588	88.9143	74.8926	110.653	121.472	226.687	210.589	70.082	429.775	267.796	64.562	146.422	90.2163	98.0442	88.4411	228.415	636.59	271.098	573.139	242.259	306.995	314.256	291.842	176.971
1	24	25	1.3e+25	Contig522	4027.5	6748.41	4548.56	10863.9	12582.2	17535.7	24219.2	30606.9	23241	7186.73	7451.36	9541.1	22359	21094.2	12314.7	36474.5	30983.4	22678.5	47193.8	37589	43285.9	46846.4	42018.8	49193.2	34154.3	34324.9	50365.5	15841.1	12229.7	17827.5	39133.9	31285.1	49848.2	59621.6	62327	60169.2	48834.6	70222.5	48145.9	32454.2	44368.5	31017.8	34136.2	39802
1	25	25	13I24	Contig5241	14169.4	21212.5	17026.2	40938.2	42064.9	58098	38216.5	42981.1	33285.6	16750.8	17560.8	22766.3	37971.2	49959.2	47350.7	66187.6	55786.3	49027.5	52920.5	53183.7	47617.3	48613.6	44225.3	44126.5	55214.9	51157.3	56595.7	21586.4	19566	23675.4	42512.6	34459.8	53450.8	80138.4	64692.8	61415.9	56289.6	77171.9	68850	53105.1	55394.8	47122.9	54988.2	50735.1
1	26	25	13M24	Contig5264	6375.82	9630.27	6936.05	14933.3	16390.1	19810	8696.64	10660.1	6930.85	8480.52	9150.26	12112.2	12337.4	11680.1	7139.39	23403.5	19704.8	13467.9	29256	23654	30478.2	24899.2	20133.4	29056.9	10910.5	10692.2	18060.7	11451.9	7889.33	12414.7	32791.3	13616.4	22716.5	20453.8	29394.6	26627.6	19496.5	35462.6	19821.7	17410.8	25389.2	16192.3	8465.97	8968.51
1	27	25	14A12	Contig5541	19939.1	27401	20613.4	12921.8	13928.2	15204.6	12756.1	17426.8	12082.3	4275.94	5999.98	5741.23	7255.01	9086.74	5471.71	21381.9	16666.3	12784.3	14268	12166.8	12801.5	15331.6	11618.8	16063.1	9528.92	7369.69	6611.67	3993.68	4669.1	4868.27	11820.1	5466.67	7842.78	8329.38	12351.4	11872.2	2473.57	4015.78	3888.36	3455.2	4399.66	6880.84	2344.92	2541.15
1	28	25	14000000000000	Contig5566	6014.7	9053.66	6095.01	2890.7	2633.47	4081.17	4056.93	6265.01	3473.88	1131.15	1324.91	1605.98	843.282	703.041	637.144	2648.6	2095.54	1885.12	1661.87	1330.49	1460.78	1619.17	1621.71	2237.53	852.52	742.254	1167.36	1971.94	1454.73	2056.34	6578.06	2599.1	4587.26	7634.99	9561.08	7720.19	2012.03	3714.61	1725.37	1531.31	3143.77	1725.57	1479.81	1935.71
1	1	26	7e+24	Contig3091	1258.51	1698.98	1496.12	1375.55	1628.93	2406.87	4471.51	4744.48	3585.79	2852.42	4266.1	2787.23	5146.83	1103.28	813.674	2884.75	1546.99	1478.7	1901.45	1600.42	3262.05	3578.91	3844.48	4880.34	3396.52	1995.6	2047.51	2751.27	2044.82	2386.28	7241.87	5096.83	4387.17	2850.12	2633.84	3750.3	2481.4	3757.66	2847.58	2402.89	1940.07	2743.78	1650.07	1447.93
1	2	26	7I24	Contig3114	3587.55	4833.08	4651.33	7308.42	8581.85	13358.4	22063.2	20018.4	16928	4060.05	5012.73	3668.47	24049	8498.91	3756.72	22633.2	11976.6	10916.5	11488.7	10880.5	20319.4	15699.1	16215.9	19512.6	31553.7	20514	23424.2	6971.37	5031.64	5861.1	40592.6	35857	27695.2	11852.4	13124.6	18067.8	29472.7	46641.4	37411.8	19328.7	13298.6	10609	19949.3	17435.8
1	3	26	95I24	mCA038616	1253.89	1640.9	1997.89	874.701	923.182	1581.85	1190.6	1985.84	1365.29	1283.43	1500.01	1009.62	1448.29	1522.37	1126.04	2489.49	2007.89	1962.31	2343.47	1139.66	2715.3	1000.77	1415.9	1320.29	4331.9	2582.55	1886.7	1818.07	2190.92	2107.95	1750.01	1491.93	2421.67	1238.22	1395.7	1325.02	1087.59	3936.54	2513.43	1437.88	1224.69	3131.01	1235.52	1201.88
1	4	26	7M24	Contig3137	8642.28	13425.4	10541.7	11463.9	16357.2	28079.6	28026.7	33167.4	22708.7	6388.27	9155.8	9340.25	38357.6	13530.9	10164.8	37772.6	24612.3	25227	22307.2	18464	32022.9	28911.9	28559.3	36912.7	22564.8	14477.9	14098.9	16536.3	12762.7	15617.9	37096.9	18424.2	33010.1	13075.1	12782.8	13343.4	8562.98	13819.6	10758.5	9164.59	10326.1	10181.2	10015.8	11019.9
1	5	26	8A12	Contig3415	872.307	904.313	1072.08	1367.05	1679.7	2138.06	7327.24	6277.67	4401.57	2165.06	2711.81	2567.64	521.664	249.288	289.102	520.742	398.264	201.265	471.299	335.658	633.083	449.949	562.909	594.873	808.843	412.856	582.252	3443.94	2141.45	3110.72	12806.8	6714.02	6530.82	1244.91	1507.81	1677.53	1130.56	2268.52	1437.84	1006.47	768.546	816.258	1282.97	1214.84
1	6	26	8000000000000	Contig3438	46.7796	94.8216	62.3074	193.446	179.822	95.9997	109.548	110.798	115.044	314.837	512.757	122.286	49.9866	67.602	170.962	356.313	176.437	135.494	43.2032	36.7594	81.7823	30.4806	119.733	55.7179	274.636	193.578	46.8706	62.8951	204.543	69.6407	172.155	129.768	139.694	77.2832	27.7014	173.92	126.841	21.9386	227.585	26.4648	57.6821	139.816	317.808	6.3001
1	7	26	emp	emp	124.515	64.3929	27.6166	98.3965	149.838	31.7478	107.75	30.3208	57.2782	65.5499	159.039	90.207	114.309	44.142	135.663	123.004	117.628	43.2623	24.3057	58.9215	41.2961	121.287	9.58241	33.1696	5.09014	14.2594	85.7856	35.3368	60.2219	43.8745	47.9701	71.257	29.6	209.509	135.826	55.1977	127.245	224.61	76.6037	90.2391	64.9687	3.01885	21.936	179.524
1	8	26	8I12	Contig3460	59957.1	80065.2	88225.6	623.206	704.647	1156.32	1890.71	1649.28	1495.47	1621.86	2342.09	1753.7	3907.15	1381.89	853.844	2952.57	2113.02	1889.9	1099.7	940.795	1271.66	1875.82	1940	1995.25	1165.92	601.768	633.204	218.472	290.48	388.861	1454.65	868.465	1248.56	581.379	1368.28	999.195	556.927	768.043	983.89	323.487	418.688	736.231	218.069	178.986
1	9	26	8M12	Contig3483	232.112	395.421	2125.6	250.844	354.912	277.103	318.284	618.068	310.109	1309.55	1583.69	1454.65	341.248	460.833	308.152	609.848	500.375	320.258	647.976	508.596	214.39	253.433	368.464	174.11	765.697	496.192	315.414	283.186	412.915	338.834	295.186	388.955	384.459	336.512	376.114	306.932	315.657	567.076	650.122	366.095	223.288	838.603	155.623	164.777
1	10	26	8A24	Contig3420	1275.21	1037.09	1531.19	558.565	827.608	745.345	766.577	1369.78	909.104	3212.76	4646.42	3520.18	1176.6	850.171	559.311	987.591	950.096	778.751	873.974	2739.1	1065.87	582.519	729.281	881.495	1684.93	1031.57	666.43	792.778	1260.8	1120.01	884.57	787.813	1176.63	1077.03	1310.05	1156.48	1065.29	1415.3	1455.19	969.001	846.686	1985.24	435.475	636.589
1	11	26	8e+24	Contig3443	1854.79	2693.21	2587.91	1366.91	1443.08	2235.6	2132.03	2641.99	2327.36	1425.05	1778.68	1965.76	4900.98	2393.45	1232.61	5397.49	3537.33	2814.85	2231.28	1582.03	2994.12	4373.17	5032.77	6571.48	3195.86	2195.9	2719.77	2262.99	1940.9	2998.04	11752.5	6327.47	8815.66	6571.87	8676.81	10653.2	4308.62	7101.23	5359	6391.45	6545.47	3014.93	2518.2	2525.3
1	12	26	8I24	Contig3466	118.043	157.086	46.6926	89.2866	185.395	202.289	137.219	243.236	141.434	375.786	417.143	208.853	38.4859	128.599	168.165	238.895	128.878	87.949	199.24	450.838	91.7621	38.6558	152.378	63.3819	226.85	186.204	70.7092	258.672	198.689	171.045	32.5939	163.807	41.4376	118.201	193.088	138.849	82.1739	113.947	214.63	56.5497	67.1859	96.2557	122.632	58.0059
1	13	26	8M24	Contig3489	920.385	1261.3	1182.82	1388.73	1962.55	2420.53	2599.23	2817.48	2197.56	1328.81	1416.56	1865.1	2255.81	1140.77	621.802	4325.3	3702.68	1878.34	3819.89	4026.71	5775.02	7102.83	8205.54	10152	3354.26	3513.69	4672.8	3045.1	2175.69	3184.14	13511.5	6705.38	10585.3	2054.77	2689.04	2950.22	6519.88	7870.55	5420.93	2933.41	3588.82	2831.06	2105.58	2331.26
1	14	26	9A12	Contig3775	9960.44	13421.2	12916.1	18470.9	22621.8	32760.2	41341.3	36575.9	40522.6	19964	22584.2	24680.3	18630.6	12559.6	5641.27	11590.4	8364.97	6286.08	26866.9	21115.5	34179.7	39024.8	37238	43247.4	37669.2	27897.6	39657	42412.9	36746.1	37309	46192	36636.8	54711.5	70870.1	60854.6	56798.4	46067.9	64907.6	56173	54310.6	56819.5	53066.5	48839	50759.4
1	15	26	9000000000000	Contig3797	2549.29	3327.52	3311.56	963.036	943.431	1584.58	1461.85	2285.25	1894.09	8491.69	9043.55	9451.32	1742.83	1280.86	785.501	2440.25	1910.84	1718.81	2220.87	1153.65	2522.88	1325.32	1706.26	2358.84	2975.97	1416.57	1442.48	1040.93	1535.1	1573.89	2074.7	1276.3	2264.6	1388.1	2186.83	2366.95	975.591	1559.44	1461.55	2246.02	2360.51	1935.41	913.911	929.554
1	16	26	9I12	Contig3818	474.671	579.156	529.687	237.9	304.744	347.991	223.685	388.188	314.828	941.525	1275.81	1418.37	36137.3	23997.9	17907.1	78814.3	60602.6	50895.5	38861.4	37985.1	51360.9	35212.4	35206.2	44378.9	20227.3	16851.5	23180.3	6947.38	5066.35	6701.82	36117.1	20109.5	41471.2	24521.6	33517.1	28928.6	44582.5	61907.5	62321.6	23267.5	32813.8	31455.4	7002.42	9436.77
1	17	26	9M12	Contig3840	706.282	734.088	744.004	646.608	647.515	788.937	1435.52	2019.26	1359.16	1919.69	2118.33	2502.53	3221.85	2144.06	1464.46	2162.39	1662.25	1231.33	1037.89	838.086	1175.34	1731.99	1672.16	1838	1560.97	984.996	841.596	612.15	823.264	747.339	2759.24	1301.31	2239.87	1234.31	1308.17	1344.26	1417.41	1999.43	1387.4	916.623	1106.89	1289.85	448.111	532.455
1	18	26	9A24	Contig3780	8190.43	11315.1	10577.6	13363.3	13854.2	23583.4	13907.4	14686.3	12036.3	6206.74	6456.85	6468.64	37296	32560.8	16015.8	55960.8	43338.4	32575.3	64584.1	52149.5	54192.9	43090.1	42177	53956.6	16909.5	14284.7	26386.8	12355.8	8761.13	13088.1	40897.8	28325.3	40850	66740.4	64339.7	63843.5	42537	62055.9	47516.3	58670.9	58117.6	30923.5	23983.9	25333.6
1	19	26	9e+24	Contig3801	4240.42	6183.81	5580.94	18478.1	18131.1	30868.3	28977.6	32414.3	25809.1	3770.61	3836	4574.37	36351.3	34489.8	18077.7	49469.4	37688.9	29708.2	34406.4	27128.7	36145.3	28672.1	28935.9	38764.4	11064.7	9787.33	15159.2	4807.55	3408.79	5241.67	34624.8	19167.1	30567.7	16488.9	26961.5	23427.3	7915.67	14367.6	9375.26	11813.8	13708.4	4931.05	8100.91	9920.78
1	20	26	9I24	Contig3824	2003.56	2665.27	2212.79	5546.23	7149.78	8830.62	4931.92	6434.2	4393.21	1634.82	1542.43	2271.08	3621.43	2310.61	1398.45	3809.64	3483.7	2192.87	5854.37	5397.25	7597.77	9820.62	8653.75	11563.2	4456.72	4779.24	6112.14	3064.94	2805.16	3350.4	22543.4	12271.4	21029.5	8844.6	13795.3	12991.5	23979.1	27188.8	22798.5	10696.8	12704.3	11873.2	4436.04	5514.33
1	21	26	9M24	Contig3846	1419.34	1755.52	1673.88	2226.9	2483.15	3607.22	3505.13	3656.14	2858.78	1284.73	1678.68	1837.01	3980.43	2927.48	1627.41	4931.97	4423.55	2903.47	4883.1	4375.89	6544.21	7889.38	7098.68	8310.32	2918.85	2588.04	3952.26	2159.83	1942.17	2343.06	10544.1	4549.18	7995.91	2825.72	4239.75	4292.79	4396.41	7549.13	4869.99	3159.35	4626.91	4059.83	2210.04	3000.28
1	22	26	10A12	Contig4121	2422.31	3969.58	2777.07	1543.46	1553.73	2283.43	1934.38	3468.97	2151.78	2176.82	2971.07	2853.57	1813.44	2004.82	1300.85	3635.02	2906.03	2178.83	2537.42	1410.28	2574.94	2924.24	3159.14	3960.02	2467.89	1685.24	1665.29	770.191	1177.76	970.113	3068.4	1355.53	2754.58	987.17	1237.39	1318.31	1240.55	2089.74	1695.9	902.001	1072.62	2272.87	2995.28	3165.21
1	23	26	10000000000000	Contig4143	654.032	1192.4	792.056	1664.47	1801.71	2860.7	3201.89	4670.21	3291.28	1037.44	1183.3	1359.08	2766.89	2126.54	1289.68	2558.91	2183.16	1439.95	3398.74	2236.74	3571.65	3230.29	2940.14	3917.23	838.688	538.959	1008.82	407.663	332.681	528.092	6082.21	2346.4	4622.86	7270.1	9097.06	9415.8	2659.44	4056.71	2464.59	1607.75	2416.1	1021.62	1306.19	1667.69
1	24	26	10I12	Contig4165	22219.8	30339.8	27174.1	59227.3	73339.9	82001.2	59177.2	61402.2	56575.5	39987.7	42674.8	44289.8	39467.5	51554	45495.7	78642.8	65696.1	58219.1	63002.4	58073	55720.3	51837.5	52168.9	57532.1	60186.5	56558.7	68170.1	20124.6	15406.4	21709	48348.6	36869.8	58819.8	50295	59760.7	53971.2	55729	67085	85052.8	61400.7	62103.4	44232.5	64056.2	57160.3
1	25	26	10M12	Contig4187	1123.28	2093.89	1292.38	961.169	1574.17	1397.78	1510.45	2121.68	1467.07	1915.45	2501.35	2643.05	2639.23	2445.6	1224.99	11908	9985.89	7150.39	4710.58	3117.06	4988.6	3977.25	4012.28	5427.91	1240.93	791.153	1418.06	611.261	603.564	690.492	5391.94	2391.93	3782.02	1813.48	2381.44	2513.69	1204.89	2354.9	1431.59	762.724	1223.63	1172.27	1302.45	1414.62
1	26	26	10A24	Contig4127	1207.89	1820.36	1203.27	3995.07	4306.87	5225.96	2252.34	2691.93	1653.11	311.285	441.178	490.098	6626.56	6645.53	3614.09	9827.06	9433.12	5097.12	8334.14	6113.2	8878.74	11813	9231.47	14426.2	1642.72	1956.65	3257.2	173.317	159.363	273.417	16001	6578.77	11516.2	4973.62	7963.65	8300.91	15041.2	28987.9	15837.7	5539.69	8169.02	5440.17	1522.78	1705.89
1	27	26	1e+25	Contig4149	9316.87	15184.6	9824.62	44265.9	52390.2	67343.8	34204.5	40319.8	30746.1	13663.9	14659.7	20086.7	28566.5	32729.8	23422	81106.2	60624.3	52717.5	61020.9	50140.3	52905.3	47850.5	42549.8	57855.8	50284	43297.3	61204.8	26458.3	17516.5	29527.7	47028.4	31348.2	59509.9	52488.4	56479.8	49425.3	47296.2	68685.5	58656.8	34596.1	48530.9	22328.7	44607.8	45039.7
1	28	26	10I24	Contig4170	7571.56	15518.3	9488.47	48413.3	46224.7	59441.5	51301.7	51079.1	43660.2	6852.88	7068.45	8151.48	33436.4	41155.2	21694.5	70341.3	58028.9	43266.1	55578.2	51764.7	50634.5	49572.8	48510.4	60861	28637.6	23848.8	33840.1	14584.5	10143.8	13892.1	61434.8	43313.1	63926.9	39339	50660.9	45858.9	48645.1	69931.9	67358.1	23087.4	32460	41543.5	46674.4	43812.1
1	1	27	4A24	Contig1972	4107.59	5060.94	5092.75	14374.2	20464.4	27685.5	8849.44	9666.01	6217.09	4678.57	6749.77	4613.18	14362.8	3598.08	2358.67	8075.04	4653.21	4201.29	10859	11855.9	19177.3	18463.5	17516.5	22859.8	41703.4	27970.2	28163.2	4693.46	3545.59	4155.52	33258.8	20327.9	22374.5	13597.3	13228.5	14313	48506.9	64172.5	56689.8	13383.3	12575.3	16051.2	9535.4	10346.5
1	2	27	4e+24	Contig1994	1826.27	2421.13	1998.95	1600.03	2264.33	3013.8	4307.27	5177.13	3832.33	1982.43	2832.7	2808.66	16735.9	3274.08	2563.32	12798.3	6956.76	6597.77	3981.45	3704.9	7191.13	7500.89	7656.34	9959.43	4543.89	2929.7	3015.68	3336.44	2252.67	2642.62	13275.9	6969.83	8852.72	3026.22	3175.8	3587.06	1799.38	2145.07	2236.72	1326.73	1330.45	1247.04	1623.36	1500.16
1	3	27	4I24	Contig2015	32.3354	132.915	109.345	212.639	163.651	160.383	116.609	335.153	126.147	492.538	724.296	432.759	232.324	88.1273	149.841	337.182	139.866	144.977	171.968	147.01	217.476	63.697	42.8597	96.2292	317.482	291.136	37.9176	45.8639	160.594	384.44	45.859	181.26	378.351	560.123	39.6229	534.304	452.503	253.83	328.799	154.069	187.831	275.607	339.002	137.65
1	4	27	4M24	Contig2037	1525.6	2643.81	1996.08	2121.77	2766.47	3512.62	5374.95	5613.9	4260.05	1769.09	2276.97	1906.73	4736.47	1884.16	1204.58	4927.18	3016.98	2394.04	5052	4331.97	7262.98	7533.85	8612.29	10313.1	7698.44	4816.11	4850.89	2122.08	1581.8	1860.72	15386.2	8894.65	9970.12	6543.82	7233.98	8708.54	10259.4	20022.8	14163.8	7626.22	7377.93	8106.16	3863.19	3532.88
1	5	27	5A12	Contig2342	321.349	482.152	371.8	485.785	411.004	534.501	1419.55	1680.49	1094.58	1199.14	1961.21	1454.47	1382.68	520.589	468.067	2169.1	1305.16	898.701	1335.64	1116.81	1889.29	1502.8	1500.49	1730.48	1245.71	831.358	822.897	292.371	341.602	436.373	2403.16	1275.59	1977.17	3728.32	4021.98	3888.16	1039.01	1789.34	1415.93	806.141	898.565	769.262	155.236	106.113
1	6	27	5000000000000	Contig2366	782.107	637.248	813.084	487.513	577.73	516.866	714.337	1233.06	1002.4	1007.06	1430.35	1063.2	1839.3	1203.42	805.336	1711.39	1451.29	940.907	675.606	437.679	901.104	3775.55	3230.53	3589.25	1505.04	808.94	649.958	690.586	895.583	848.599	744.811	808.486	1110.02	905.67	691.975	1022.43	805.203	1681.71	1272.28	697.073	660.696	2160.75	562.661	599.32
1	7	27	5I12	Contig2393	3365.95	4083.75	4207.48	5484.1	7117.75	11914.3	28695.4	30568.9	23179.1	9237.78	11630.8	12122.5	14216.3	5453.97	3570.39	17432.6	11181.2	9261.68	14788.7	12845.6	21530.9	18683.2	20301.8	24568.4	19006.7	11087.6	12520.6	8400.41	7395.69	9129.28	30621.1	14831.4	26159.1	9797.57	10729	10708.5	16333.4	24999.1	19967.3	11019.5	13735.5	15381.7	3908.49	3896.86
1	8	27	5M12	Contig2415	15181.7	10969.3	19601.3	15560.1	11553.7	27217.8	30057.2	20083.5	13951.8	12316.9	17012	10946.3	25278.6	13830.8	9690.91	23485.2	26881.2	29188.6	21423.2	20382.5	35287.1	18737.2	21774.4	27742.6	28372.8	20709	23393.2	12472.8	19359.2	16391	11604.3	13609	24711.5	26848.4	46223.3	33777.5	44844.8	27335.7	43318.3	27402.8	27583	21576.3	15648.8	21835
1	9	27	5A24	Contig2348	4019.48	5584.04	4878.82	23177	30297.2	53040.9	32751.8	34067.1	25875.5	5721	7318.23	8476.53	1252.94	638.567	449.431	8543.21	5472.2	4578.02	14946	11003.3	20582.2	12243.6	14067.3	18180.9	8241.19	5980.35	7264.79	2448.02	1829.27	2979.77	8786.51	3879.96	7697.05	4290.13	4711.72	4594.3	14970.6	22457.1	17599.8	5565.11	6063.82	4527.17	1896.81	2045.39
1	10	27	5e+24	Contig2372	301.079	242.291	464.652	344.227	257.289	383.696	442.464	639.903	444.891	1535.7	1961.33	1729.32	290.115	367.525	320.289	479.278	310.948	192.298	436.596	196.913	358.635	153.76	314.912	328.391	702.662	421.751	297.735	274.515	468.209	300.184	217.177	367.035	516.191	271.668	295.468	332.125	509.711	619.593	624.937	255.23	311.574	1042.39	225.65	216.576
1	11	27	95M12	mCM038700	112.189	48.9952	96.1677	151.457	221.839	199.79	131.86	34.0597	93.3636	70.0682	149.903	166.873	101.219	96.0469	209.14	172.28	106.612	98.8724	131.696	83.0529	82.1154	155.351	44.0024	70.5178	139.115	72.2316	105.895	34.5249	285.255	141.331	10.1344	30.009	77.1508	63.0986	37.332	75.6079	46.8465	100.236	177.534	249.445	85.912	153.573	199.185	26.5055
1	12	27	5I24	Contig24	2331.02	3202.39	3080.06	799.976	900.927	1316.12	456.587	691.39	446.334	997.724	1233.87	1111.04	5157.61	2491.15	1566.83	3583.09	2409.36	1732.14	5733.65	4578.51	8256.45	13417.5	12319.3	18447.6	12644.3	8978.95	11073.7	1768.35	1742.81	2147.36	4725.62	2156.37	4355.91	1046.11	1156.93	1257.23	8826.56	14938.2	10273.8	3262.77	4605.09	6137.46	471.574	664.971
1	13	27	5M24	Contig2420	82.6798	23.9031	162.857	34.7787	308.363	137.236	84.7725	104.381	137.71	91.7816	303.887	205.011	133.916	170.589	93.2682	218.314	89.3299	46.9146	36.6423	6397.44	121.332	48.0719	66.5156	141.074	198.328	212.78	66.2146	96.9822	84.3068	132.812	63.0141	50.6723	167.56	97.7187	19.5475	75.147	131.181	98.761	69.3981	97.5892	104.636	152.118	265.05	94.6376
1	14	27	6A12	Contig2706	527.892	446.66	699.468	274.111	519.698	331.983	205.742	396.309	222.183	2047.62	2504.23	2203.31	296.19	321.1	249.417	345.98	464.806	281.849	442.072	221.881	380.008	117.207	379.641	175.787	561.024	366.09	165.439	537.43	775.045	613.571	213.807	172.883	294.553	286.914	285.43	400.146	259.135	357.4	393.928	347.789	345.401	545.963	84.3744	168.903
1	15	27	emp	emp	98.3404	99.5359	137.281	131.303	189.92	26.301	86.895	32.6827	152.153	70.6115	47.6551	33.9341	59.0132	129.779	176.635	54.1625	59.631	114.548	77.4097	45.4655	41.3634	24.5338	90.5601	27.0652	48.1399	25.3059	73.9892	242.571	237.833	93.4777	50.4841	118.607	63.9818	39.0022	53.9905	45.689	6.79891	3.67453	123.149	67.0991	29.0624	51.4775	72.8983	98.5603
1	16	27	6000000000000	Contig2728	233.836	350.709	232.318	79.5974	188.965	110.998	47.5623	130.282	89.3524	92.9567	124.008	161.566	72.7528	66.4667	118.471	613.469	138.68	76.9143	106.367	220.604	126.294	105.243	219.152	152.743	197.281	106.323	128.858	128.741	144.153	111.683	344.457	121.91	233.144	142.494	93.5456	135.676	95.5553	88.5092	116.571	53.6857	137.879	198.543	87.8912	84.0502
1	17	27	6I12	Contig2750	479.163	695.491	565.113	1986.74	2235.8	2843.49	3290.63	5179.7	3821.94	302.715	290.166	342.494	10285.1	6829.23	3977.61	13444.5	11060.9	7777.51	3895.29	2731.86	5290.22	5822.08	5704.5	7378.28	1334.78	1190.65	1578.8	214.836	237.197	217.454	5934.21	2770.61	5564.02	1294.54	1681.53	2274.01	4932.46	8266.79	5703.54	2191.91	2028.77	1526.62	2358.54	3323.35
1	18	27	6M12	Contig2772	2350.85	3186.32	2690.28	220.878	312.221	423.955	1125.73	1772.69	1615.18	2912.26	2879.88	3113.41	992.414	547.673	296.983	1587.33	1289.98	755.805	1468.21	1070.12	2075.84	4669.22	5009.14	6365.02	2123.85	2016.17	2300.68	3685.48	3452.97	3804.38	20608.7	12329.3	20448.5	19557.6	28272.9	31247.5	7789.45	13120.8	9948.49	14778.2	17165.1	14931.7	486.652	881.151
1	19	27	6A24	Contig2711	6022.6	7802.49	6672.37	10242.9	10885.2	18931.2	30207.7	39419.1	32416.3	12636.1	12396.4	17091.5	17495.3	10205.1	6557.98	29187.7	23198.1	17921.9	50833.5	38919.4	47363.6	43115.5	40645.9	47694.8	38626.8	36720.3	50488.7	33144.5	26371.8	37015	44504.2	32412.5	58102.6	35837.6	50026.3	43059.4	45571.7	56117.7	51569.9	47257.6	51079.7	41468.9	21067.4	27097.2
1	20	27	6e+24	Contig2734	14031.8	21721.1	16114	20311.3	22231.1	36290.1	22796.9	29387.1	22132.6	10524.3	10599.9	12149.1	34904.7	25076.2	13730.5	39104.6	31465.8	23243.3	56278.5	46642.7	48134.6	43570.8	42817	52974.4	37247.6	33253.6	42558.5	23635.7	19433.3	27311.2	45019.1	32894.9	49795.2	53931.4	57732	51657.7	38756	60155.3	46922.3	32502.2	47023.4	37346.7	14709.9	17252.8
1	21	27	6I24	Contig2756	1874.51	2994.45	2232.42	3722.17	3488.59	6801.3	4962.34	6353.47	4694.22	8048.91	8973.02	9234.43	4702.58	3716.42	1656.11	9691.36	7900.87	5949.55	9642.9	7142.16	10217.7	7530.25	7560.72	10641.3	2127.1	2072.94	3023.98	4246.29	3088.82	4335.66	8389.99	3206.88	6451.21	3831.45	5871.1	6534.3	1500.74	2906.92	1720.95	2241.03	2698.22	1577.83	2880.07	3228.71
1	22	27	6M24	Contig2778	8280.13	11346.8	10006.9	36555.3	39898.9	64131.4	43864.7	40173.8	37529	8661.27	8607.39	10070.2	31827.6	30489	19952.4	48495.1	37170	28492.2	40251	35681	41197	39015.3	36713.2	43791	33662.8	28194.2	43087.7	10385.5	7418.42	10821.6	52237.5	32442.3	48084.7	22518.4	31758.3	26800.4	44218.9	59128.3	45426.6	25467.2	42041.3	26447	22479.4	25925.5
1	23	27	96I24	SPOTTINGBUFFER_I_24	86.2282	68.4806	128.912	62.89	251.205	51.7528	258.746	297.456	131.624	73.1092	176.698	16.2907	83.5425	38.8669	140.325	46.726	39.7541	67.4665	12.6742	21.773	47.8745	40.098	88.5774	18.1251	51.5966	89.2852	30.2087	219.214	179.75	18.504	33.8047	47.6246	35.8759	66.7946	17.0945	28.3707	1048.63	59.6383	40.1354	64.6452	54.5242	47.3496	146.142	21.1913
1	24	27	7A12	Contig3063	2913.97	5288.6	3732.76	1783.79	2085.73	3673.2	6216.85	8828.23	5838.25	3913.55	4455.53	7896.6	5545.67	4269.86	2600.44	8626.5	6964.66	5215.01	5553	3580.83	6040.8	7119.9	6896.2	9824.7	4886.47	4161.6	6130.75	4790.64	3116.97	5082.37	12071.5	4811.21	8960.42	3422.73	5164.98	4578.99	4171.51	6303.77	3790.74	2734.26	4724.79	3293.15	3288.18	4116.24
1	25	27	7000000000000	Contig3085	326.894	381.86	377.109	286.967	956.233	186.868	385.353	600.396	244.98	1095.66	1351.71	2034.49	257.38	350.969	247.763	550.507	465.48	302.47	437.552	392.391	498.383	182.808	350.48	230.861	619.671	389.147	576.858	286.375	512.349	394.403	244.764	267.892	332.119	382.488	286.759	570.219	520.465	346.563	557.156	5814.85	456.403	949.875	122.911	179.199
1	26	27	7I12	Contig3109	4200.41	6389.94	4371.35	21032.7	23459.5	29279.9	15847.5	17672.6	11832.5	3581.62	4096.86	5869.78	30477.4	32948.7	20268.9	47220.7	47682.1	29970.2	39758.9	32667.7	38030.1	33963.8	27412.4	39640.2	16144.6	20677.6	33196.2	7319.27	4628.43	7030.47	39435.3	15857.7	31959.1	33043.8	52166.8	54539.6	18553.1	35665.7	18406.6	11347.8	17067.2	10324.4	19470.3	23052.9
1	27	27	7M12	Contig3131	528.296	1091.08	537.392	552.963	769.282	490.348	1090.22	1666.77	1305.49	221.684	259.623	333.271	856.583	1139.53	477.21	2320.76	2527.36	1329.22	1013.09	542.463	1062.76	1172.71	1135.31	1472.18	320.757	382.109	524.072	202.442	214.873	224.037	1275.58	590.031	957.487	303.536	538.352	780.361	181.963	316.575	444.837	299.357	368.555	199.612	322.414	405.439
1	28	27	7A24	Contig3069	7141.45	13032.2	8476.13	27342.1	28020.2	36425.4	33382	38419.6	26198.4	6144.77	6519.31	8034.27	29837.9	30212.9	17356.2	77544.6	62801.6	50524	58234.6	49242	52230.6	44728.1	38068.8	54697.5	27042	24610.9	41201.3	12489.9	8630.85	13348.3	46366.8	31712.6	48543.3	41449.6	50459.9	52697.9	38274.3	57102.4	38218	29827.2	43317.8	16667.9	47918	42084.6
1	1	28	1A12	AF215933	420.362	677.399	379.02	214.287	240.485	197.274	508.649	783.269	488.039	246.452	440.413	354.699	954.674	356.974	330.338	1381.13	551.272	427.953	478.953	426.347	434.205	595.479	665.02	649.489	796.426	436.082	329.582	199.627	271.318	312.746	1206.71	1021.32	838.919	1431.52	1273.64	1528.58	462.569	590.403	546.334	196.895	295.814	902.027	498.91	257.184
1	2	28	1000000000000	AF325695	408.33	556.569	306.432	159.962	274.072	170.941	136.626	453.955	217.61	206.085	335.167	230.735	290.303	161.799	181.724	513.099	169.687	272.58	310.411	284.736	258.024	187.259	215.41	308.864	245.412	230.927	307.405	177.24	146.707	141.644	264.405	262.156	223.48	347.091	180.278	392.291	192.933	264.691	224.815	148.461	158.346	305.011	140.088	219.707
1	3	28	1I12	AF473536.1	34115.7	46414.2	40363.7	55330.9	70183.1	88174.2	73055.4	73813.5	75035.5	47232.7	47008.1	52952.3	64364.3	57326.4	45926.5	92934.1	72576.7	64806	68293.8	59810.4	70533.2	54932.1	54519.2	64104.7	77028.4	82541.4	71576.5	68145.5	54636.7	50347.9	68458	60597.9	67700	84544.6	61909.2	66112.9	73512.5	74688.3	82860.6	65612.2	59062.6	58093.2	76677.6	63963.2
1	4	28	1M12	arginase	4628.97	6674.78	5999.77	361.923	429.013	630.19	1614.92	1760.06	1265.67	216.836	324.054	228.08	70298.4	44226.9	51337.2	87049.5	65130.6	63428.1	26102.3	23733.2	40254.2	44590.9	45562.3	44384.3	60060.8	51795.2	55065	8231.19	5895.42	7406.68	43995.5	30381.7	47805.3	56013.7	57486.5	47036.4	53140	77303.3	72151.1	45176.3	42705.4	42267.3	60562.4	46546.3
1	5	28	1A24	AF243514	3159.39	4014.18	3765.26	3189.22	4459.93	6466.99	6140.07	8756.24	5909.73	3356.68	4501.28	3805.41	10327.4	5114.8	3381.02	12665.1	8767.1	8733.84	7940.56	5632.72	10948.2	8299.04	7992.87	11243.3	14302.5	9690.16	10566	7016.18	6757.9	6652.3	13042.3	8145.83	13236.7	12932.6	12748.9	14681.3	15192.5	20827.1	20010.3	11339.5	10108.6	12148.3	3274.1	3516.36
1	6	28	1e+24	AF330106	190158	132860	149073	79807.5	73513.8	95158.9	68514.7	102207	80591.7	76629.1	75035	99856.3	86352.8	63592.7	60205	75743	79163.5	63162.9	69095.2	74886.6	77500.2	66477.5	65708.6	77743.8	69098.2	82409.7	72096.4	87005	73762.2	84920.6	97959.9	72217.3	81155.4	87682.6	155887	77245.1	98126.5	76698.4	71667.6	81431.6	85115.9	88784.5	63736.5	70574.4
1	7	28	1I24	AF510337.1	5170.2	7144.57	7256.5	2689.89	2881.58	4599.72	3697.64	6137.63	4220.14	5035.52	7047.75	5725.74	5304.56	2875.01	1671.97	8303.94	6050.72	5664.35	5231.65	3366.39	6068.25	4207.15	4757.99	6361.87	9232.67	5926.09	5553	3589.44	4117.75	4201.63	7229.06	4576.38	7379.4	5027.9	6196.72	6947.4	6886.53	8500.96	8359.91	4448.95	4748.2	6681.62	2560.4	2236.13
1	8	28	1M24	AY055467.1	6923.07	9633.91	10433.3	4764.71	5301.82	9744.26	15674.9	15424.3	13127.7	2615.33	3446.48	3010.25	24012.8	8387.12	3959.42	75214	45970.1	41983.3	10125.9	8779.36	15873	9872.62	11829.5	14619.8	14982.6	10122.9	15923.5	14315.8	11313.2	16853.4	46183.7	37631.2	47711.4	30095.6	36598.9	40255.2	31692	51364.9	41083	48635.9	54258.5	23069.9	34312.6	31516.4
1	9	28	2A12	Contig1266	94534.4	102262	93021.7	49886.3	53342.8	65141	62459.3	74319.8	66926.7	59196.4	59593.7	67590.3	79273	64981.6	57047.2	73753	75453.2	71041.5	75055.8	77016	90791.9	71676.9	69998.2	73098.8	72647.9	87658.9	65365.4	111719	74073.6	114422	95400.4	63184.5	69454.7	87081.7	107978	75898.7	72292.7	65759.1	66331.1	127882	81438.9	70027	64307.8	68590.9
1	10	28	2000000000000	Contig1288	7065.7	11398.5	10204.5	10125.6	11161.3	22561.3	40179.1	43057.1	37545.8	8565.63	10434.9	12679.3	3271.93	1240.55	893.868	3888.95	2403.06	1981.09	4369.02	3016.42	5438.01	11314.5	12525.7	16355.9	13548.8	9588.62	11829.5	24652.5	21905.5	29447.3	49538.5	38660.6	50169.6	67769.8	64652.5	63000.2	27546.7	41741.6	33382.8	39156.3	48489.4	41767.2	13077.1	16274
1	11	28	2I12	Contig1309	5504.31	7256.39	6912.67	5317.78	6367.71	10384.4	12378	14188.8	11447.3	8523.74	9804.19	9113.42	14850.8	7994.39	4038.64	11238.5	8210.2	6489.2	17360.3	14446.5	25304.6	18478	21054.4	26356.3	14755.7	9787.51	13982.6	16006.4	11803.1	17460	37870.5	23419.8	33866.8	16293.1	21139.8	26403.6	10630.2	19756.2	13077.1	30137.6	29894.4	20173.8	17995.3	20069.6
1	12	28	2M12	Contig1330	76338.9	76628.7	89908.9	5459.84	4824.82	8162.64	17799.8	22660	21437.1	8386.1	9612.6	9214.88	25712.4	13139.9	7185.82	15771.4	14228.6	14401.7	8927.32	6912	13214.8	13225	12993	16859.3	9116.96	7007.59	5399.86	3402.11	3836.45	5663.3	16039.6	9261.37	10218.8	10750.5	19124.3	15896.9	4482.03	5996.99	4819.81	4784.91	5448.89	8308.24	7700.81	8638.04
1	13	28	2A24	Contig1271	1896.85	2743.24	2829.19	2611.45	2605.95	5021.69	5529.73	6849.78	5778.36	1453.71	1535.08	1492.02	40562.2	41969.6	23632.5	72566.1	48452.9	45194.5	22465.1	16587.8	30474.6	36288.5	37700.4	48590.1	48146.9	36457.3	44640.9	2388.93	2738.98	2783.24	41154.7	32593.6	51623.8	20818.2	27951.3	27286.2	57283.4	65914.1	78218.8	24716.3	30961.8	30330.8	16690.4	20212.4
1	14	28	2e+24	Contig1293	15056.7	20530.5	18841.3	37361.7	43049.5	60990.5	47576.7	44198.1	39473.8	23690.7	26619.9	30454.3	46685.7	42935.6	27604.4	81907.4	69214.9	64699.5	61246.7	45166.3	50002.5	47780.7	51110.7	59479.2	70758.7	56143.5	69231.4	41140.4	47180.4	46488.7	61751.5	37363.8	55023.8	53396.5	60037.3	53147.1	61167.3	68113.2	85230.1	51784.3	59090.3	49774.3	64767.9	53096.8
1	15	28	2I24	Contig1314	2508.89	4030.66	3400.24	8852.27	8712.31	16512.6	18551.7	21995.4	20226.4	4543.22	4933.17	4974.44	13401.1	8151.77	3693.92	44794.2	33050.6	25839.1	18622.8	11714.3	21588.5	15221.2	18751.9	24153.4	7998.4	5542.69	7636.45	4164.32	3924.28	4732.76	27391.1	13786.1	22932.3	14070.2	19587.5	20718.8	23044.7	41428	28133.6	18991.3	22850	14874.4	8888.36	9081.61
1	16	28	2M24	Contig1336	847.762	980.372	977.897	3803.95	4089.26	6461.84	4043.9	3894.65	3105.96	790.633	778.351	1046.15	33851.6	34496.9	22656.2	35930.6	26589.4	17626.8	2876.35	2457.59	4487.26	6104.22	5901.52	8012.19	988.197	1081.75	1318.61	249.758	260.632	265.37	2882.03	1453.92	2400.09	1227.58	1467.75	1709.47	6453.73	7527.87	5925.35	2202.82	2673.83	1939.97	423.053	534.842
1	17	28	3A12	Contig1612	1578.23	2218.6	1928.22	3586.41	3702.54	7025.71	6360.1	7761.03	6011.5	1394.66	1558.09	1404.96	4492.68	2954.48	1559.3	7007.6	5210	4045.2	7915.85	5647.51	9587.06	7200.46	7728.61	9555.88	3890.01	2835.57	4449.23	1588.85	1655.07	2028.33	27886.6	13132.6	23622.7	47798.2	53159.3	52078.6	39168.9	58651.7	44649.4	37651.6	43227.9	17707.3	19488.2	22930
1	18	28	3000000000000	Contig1634	62382.2	81776.1	90796	69801.7	85484.8	94817.6	76995.7	68856.5	67873.4	54258.8	56387.5	84163.2	69457.7	63193.6	52924.2	115610	94841.6	79998.6	72034.5	68319.5	76192.9	70123.3	64515	78922.6	109054	114307	95935.2	73367.4	66039.5	65532.1	89329.7	52238.7	77408.2	72341.3	95273.7	70499.6	80774.7	79480.5	84179.5	85658.8	80630.8	85049.3	87706.9	85986.6
1	19	28	3I12	Contig1656	1793.08	2741.15	2206.66	2791.06	2582.43	4858.49	9487.01	12195.5	9446.33	2195.37	2467.04	2468.43	1682.93	1224.33	544.777	3791.28	2844.17	2225.46	2234.17	1419.93	2265.51	1314	1589.59	1922.03	1379.61	949.332	905.053	780.953	871.885	969.831	2239.94	967.976	1934.01	3718.6	5591.4	5962.37	15603.5	26237.7	18903.4	936.963	1036.98	1072.95	56858.1	51716.8
1	20	28	3M12	Contig1678	6137.78	8221.31	7169.21	14279.2	14822.9	25905.3	18259.6	22231.5	16930	3837.8	3877.35	4400.02	14338.1	11067.9	5694.86	20428.9	17428.9	12713	22824.2	17269.5	24143.4	25561.1	25940.7	34273.8	10889.5	9524.85	14312.1	10772	8369.14	11486.5	43491.6	29079.8	47138.7	33063.5	45351.4	40542	14648.4	25935.9	16715	26886	34932.9	14274	16895.9	20104.7
1	21	28	3A24	Contig1618	3610.67	3546.4	4066.99	18454.5	21280.2	27450.5	35486.2	41916.8	33140.4	4422.5	4964.21	5199.07	15924.7	13904.2	6960.38	17091.5	15335.6	8891.57	18970.6	16635.9	22964	21204.4	19847.2	25525.2	13655	15271.8	22534.9	3538.98	2733.16	3711.36	39903.1	18170.4	29205.4	5651.44	7942.31	8842.24	13168.9	21763.1	13537	5412.98	6816.9	3419.29	11444.6	13632.7
1	22	28	3e+24	Contig164	37758.6	48242.5	48291.6	54771.5	73017.7	82080.3	57457.2	55639.3	43786.5	26391.8	26215.1	28717	41227.1	49283.1	51123.9	82305.6	69562.2	55169.2	57284.7	50112.7	49944.3	47176	48605.2	49290.7	60559.4	51621.8	66324.2	34689.8	25834.1	36637.8	53124.1	35312	60062.3	93098.2	67125.5	60262.2	50303.2	64649.3	68731.1	50098.7	53566.9	51106.2	65370.1	59444.4
1	23	28	3I24	Contig1661	10355.4	13119	13135.8	39171.9	40615.7	63609.7	26427.5	29829.5	20665.6	6305.13	6715.8	8414	29575.6	19157.8	11513.2	37660.9	22820.2	19782	32733.9	33923.4	34522.7	29826.3	31115	38828.8	9237.19	7160.34	16739.6	15777.4	8869.56	18801.9	43260.8	25420.7	33953.1	31997.2	49365.6	41688	11789	26043.1	9532.81	16034.9	29807.3	12132.3	18398.9	20083.3
1	24	28	3M24	Contig1683	70395.2	89375	94620.2	66270.3	77614.2	100128	70471.1	77119.9	78770.5	54128.8	57151.7	92697.9	72514	69231.2	48698.7	106209	81241.8	67210.2	82258.4	71193.9	70715.6	57017.5	55494.8	70635.2	84723.4	89632.9	75147.5	74989.2	58236.4	81710.7	78046	53366.6	69205.3	71978.4	102827	72391.4	77760.2	74239.8	84872.6	88393.1	95224.1	74654.1	92037.9	74614.9
1	25	28	4A12	Contig1967	7499.04	12639.1	10300.8	30421.4	32704.5	47551.2	39206.7	39064.9	35737.8	13227.1	14730	25496.4	25635.7	23978.6	12179.1	45396.5	37025.1	29707.3	46008.9	32301	47392.4	39361.8	36583.1	46140.7	37378.5	31576.2	42741.1	14657.4	12624.1	17750.1	39482.8	29132	47547.6	10009.9	16014.5	16634.7	31551.6	52057.4	35276.1	13251.1	21759.1	16212.7	23543.9	30452.2
1	26	28	4000000000000	Contig1989	14522.1	17233.1	16183	32307	38224.5	34376.4	27161.6	21464.1	17632.1	11577.7	14406.1	22685.6	26325.7	30701.1	20635.7	25920.8	38867.1	31004.9	21019.1	18243.4	17810.1	22249.5	16205.2	21851.7	15034.3	15209.1	14953.4	7072.06	14452.2	13405.7	13664.6	16944.3	20214.6	5408.62	16157.8	14367.6	26737.4	22856	37205.8	14859.5	16587.3	15764.7	20939.3	27394.2
1	27	28	4I12	Contig201	530.377	945.886	604.601	164.445	235.517	246.27	170.647	414.27	226.113	407.083	379.117	485.126	802.152	696.822	507.503	763.728	372.513	285.31	678.851	576.553	817.349	859.316	905.5	1248.95	354.608	379.987	334.388	114.423	150.562	148.065	1464.95	553.787	903.867	1186.57	2047.15	1531.71	327.679	496.646	374.368	302.378	503.568	295.265	88.4008	100.572
1	28	28	4M12	Contig2031	14006.6	23937.8	14749.7	56116.7	61820.7	68496.3	41103.8	41060.8	39865.6	13711.7	13197.3	19369.9	35306.9	41509.9	38538.5	82974.8	61957.6	62910.7	58184.2	52018.7	48218.8	49363.7	51205.5	62197.7	68735.3	56929.6	56028.5	15411.8	11331.8	16850.4	46651	34152.5	53037.8	27565.9	35968.9	34155.1	51025.2	76507.9	71868.3	33894.4	53231.4	37613.3	23324	28282.9
2	1	1	90B24	SMLC54G04	1691.72	4770.04	1746.9	984.928	2799.14	4089.44	3375.75	7577.51	4001.33	531.913	362.502	4461.22	3782.93	4531.37	2242.88	3217.88	5029.2	2608.35	4919.13	2061.82	8680.47	7979.86	8747.01	10801.9	3576.94	5488.52	6042.86	1965.83	889.132	1853.43	14672.5	5609.2	9485.79	1033.61	994.439	524.471	1101.64	7989.2	3941.68	1237.32	1023	1151.35	2421.95	3500.25
2	2	1	90F24	CL44	135.556	86.102	244.837	288.103	282.033	231.593	306.409	196.359	151.442	1188.78	833.153	3376.16	249.646	127.769	176.784	387.693	221.904	453.055	180.006	228.736	462.153	191.901	140.299	107.679	306.612	412.996	152.573	459.098	428.85	404.587	150.476	178.093	240.728	278.726	257.161	372.158	97.1121	597.125	283.65	156.135	177.223	261.286	189.305	367.289
2	3	1	90J24	CL167	66769.5	82854.3	73069.2	2887.8	5102.66	6906.98	6881	12465.6	7063.7	6075.43	5861.43	9796.1	17305.3	21900.5	12184.9	15530.8	22209.6	18796.6	14249.3	9325.87	18947.5	20095.1	17769.4	27498.2	5870.18	9197.02	5864.6	4699.42	2759.53	4809.23	13188.2	7347.23	7874.93	8713.71	12499.2	7095.65	1351.77	4496.16	3665.91	4228.12	3885.62	2547.39	2937.71	5193.62
2	4	1	90N24	CL277	171.349	643.558	201.949	189.664	283.497	303.798	218.94	285.716	171.14	460.702	335.814	933.9	234.098	275.093	209.927	245.286	438.247	283.321	158.02	225.675	363.759	377.546	316.088	279.814	313.754	318.79	242.667	195.17	219.161	216.976	418.492	257.591	287.071	321.556	248.007	283.722	233.8	684.244	445.577	168.901	237.254	217.981	277.483	194.882
2	5	1	91B12	CL364	37.7156	78.2592	104.833	41.8135	309.517	92.4609	347.111	103.167	84.3571	163.562	81.9089	758.792	44.5402	126.288	47.2121	68.7581	28.8762	47.774	127.703	122.205	144.53	195.493	126.05	48.0137	128.337	226.321	183.591	118.979	299.869	130.751	172.039	5626.07	37.9746	163.638	109.731	232.863	162.708	239.741	278.877	195.879	184.224	229.587	316.138	266.783
2	6	1	91F12	CL463	56004.4	91997.4	59097.8	3402.22	6223.13	8405.15	8524.6	19606.1	12389	7718.41	6923.65	10441.5	24220.4	30214.1	17319	20700.1	32189	26906.9	14115.8	8659.55	19118.4	30650	24156.1	36695.4	7810.95	12743.5	11077.3	6358.2	2790.26	5875.22	18214.1	13983.6	16152	5393.24	6309.81	4438.45	3023.23	14414.4	9444.56	7889.24	7045.23	3543.46	6154.43	9842.37
2	7	1	91J12	CL563	1088.93	3550.17	1220.62	925.91	1753.03	2553.73	1936.47	4137.75	1997.95	2044.7	1966.62	2885.98	3703.22	4271.42	2600.23	2933.57	3328.54	2397.72	3476.83	1751.45	5406.2	5245.28	4777.56	7597.2	1518.13	1725.7	1818.62	1238.88	893.213	1486.02	10000.6	3310.6	5101.31	6243.02	5724	2914.53	904.37	5043.23	2184.31	1459.74	2396.27	1989.08	1319.75	1449.86
2	8	1	91N12	CL664	165.427	96.8739	216.212	91.4993	319.808	67.3497	126.266	121.974	232.613	149.482	138.397	148.71	171.907	150.511	121.861	30.1718	42.8001	176.249	79.0205	116.314	45.7659	112.918	32.7699	91.9963	157.801	197.52	81.833	75.0548	362.841	112.007	176.33	180.403	79.2988	185.694	7.31834	308.112	19.729	141.925	179.979	163.08	193.703	117.869	293.763	391.557
2	9	1	91B24	CL376	2601.71	9817.93	2907.21	187.174	390.966	702.069	275.278	560.706	317.764	1190.3	1006.69	1194.59	469.485	578.436	452.622	887.242	645.865	19257.8	962.78	558.052	1108.93	795.495	681.468	1019.64	902.258	786.076	549.241	915.438	733.041	1285.24	3333.36	1175.02	1904.37	970.297	672.676	549.376	181.073	938.951	505.59	636.63	771.98	749.132	324.178	263.732
2	10	1	91F24	CL475	29962.8	77349.3	40282.2	1539.12	3521.98	4494.9	2708.48	5937.04	3513.1	2920.11	2737.08	4042.17	7422.25	9910.88	5904.79	11335.8	11895.1	12367.9	7570.07	3832.67	9242.22	12392.2	9586.81	13380	3436.31	4523.27	4624.19	4162.74	1587.78	4771.53	12296.2	5199.09	7371.71	4152.92	4309.1	2314.03	832.936	3804.73	2064.85	4530.3	3954.86	1505.94	2315.03	2921.23
2	11	1	91J24	CL577	2945.5	11831.3	2983.65	16693.5	27472.7	58461.9	22959.3	44846.3	28645.9	8575.25	4990.31	8927.54	193.379	222.792	143.142	317.19	263.594	222.689	183.607	141.605	379.513	222.73	283.73	316.195	278.738	317.398	169.021	146.444	107.275	176.321	688.391	213.876	275.167	163.342	129.329	136.772	138.462	583.782	366.195	262.44	196.532	213.504	195.38	125.064
2	12	1	91N24	CL676	222.599	719.621	476.61	187.876	220.594	201.22	148.042	227.533	121.372	1304.34	804.562	1155.23	344.548	285.729	297.078	507.961	566.703	427.027	883.159	583.538	1545.58	1393.93	1387.59	1936.36	708.398	869.033	1020.53	1119.74	528.913	1163.36	4342.21	1169.34	1786.14	869.394	651.107	559.197	226.068	1327.59	689.062	416.127	688.164	448.614	405.068	625.547
2	13	1	92B12	CL765	336.525	1132.21	448.761	132.059	209.768	169.881	87.5037	183.129	118.018	268.774	218.417	285.387	151.363	184.474	194.494	290.421	201.99	184.559	422.484	160.191	531.831	222.307	195.69	241.558	329.403	211.307	137.977	202.595	139.576	241.79	303.452	230.505	193.367	308.191	205.968	176.989	104.09	374.848	235.055	248.403	196.381	187.137	152.239	170.666
2	14	1	92F12	CL870	1077.69	4101.6	1365.05	704.855	760.126	1890.53	703.994	1810.95	945.334	1540.46	930.897	1669.36	1017.37	1306.14	691.668	2516.75	2346.31	2394.55	4297.86	1834.48	6788.48	2231.26	2661.09	4281.42	1005.28	1219.89	1345.42	872.992	401.406	969.394	5557.61	2128.32	2314.92	1912.39	1698.41	947.202	528.585	3802.99	1635.48	502.562	586.442	666.413	3788.11	4447.32
2	15	1	92J12	CL988	857.16	3847.31	1417.47	530.451	620.24	1713.48	776.962	1234.97	1123.99	1885.38	1482.14	1522.12	1693.51	1748.11	992.736	1611.3	1439.87	1606.24	2724.23	1279.95	3468.35	1175.26	1326.97	1862.2	1755.42	1421.24	1948.04	1227.24	997.911	1838.66	1724.24	1349.68	1691.53	1744.44	1336.78	1183.34	497.608	2364.97	2219.81	1663.85	1774.61	1519.49	1760.04	2043.02
2	16	1	92N12	CL1104	2038.55	9416.66	2659.91	1301.74	1514.96	3667.59	1434.33	3569.83	1590.78	2745.8	1894.2	2716.67	2109.35	2246.16	1268.81	2812.07	2336.74	2348.59	3981.09	2012.5	4882.31	2772.65	3111.98	5164.76	1874.08	2121.42	2276.78	839.918	741.975	1593.76	8754.43	3353.61	4107.77	3410.11	2505.52	1598.76	982.227	6237.76	2802.99	1847.38	2455.92	1497.45	1249.82	1301.87
2	17	1	92B24	CL777	1803.89	7015.65	2166.11	4608.81	5615.55	17774.8	9860.95	23851.2	11209.4	9098.24	5370.4	9726.47	17160.2	14360	8795.71	16892.5	18860.8	20213.7	24222.2	13820	33925.7	18421.3	23242.2	26428.8	21279.9	40085.4	44859.9	13017.9	3851.77	14356.9	47066.2	32516.3	45873.5	18509.8	18243.9	8524.36	33012.3	75787	43700.2	32912.7	39182.8	17088.4	9664.1	13955.5
2	18	1	92F24	CL887	164.181	554.03	302.744	360.875	247.33	558.031	628.268	1475.09	614.643	327.306	295.277	295.842	1624.43	1312.25	778.4	818.533	1026.39	719.222	908.181	525.296	1539.3	829.677	937.894	1306.34	285.611	221.959	234.089	182.373	229.715	216.071	6081.87	1871.62	2566.15	1608.09	1068.34	743.024	479.583	2338.28	1074.45	383.051	617.436	382.926	294.829	120.32
2	19	1	92J24	CL1002	473.471	1626.13	574.927	1735.33	3495.97	5597.93	4300.76	11593.2	4543.26	1328.15	1041.92	1421.26	5334.8	3951.49	2285.75	2170.45	1902.46	2205.54	4756.52	1886.04	6591.11	3773.23	5672.26	7247.68	1847.29	3497.33	5585.05	926.611	623.949	1014.15	15705.2	5638.7	7357.98	1022.4	440.813	581.238	1362.73	13771.2	5937.8	1391.86	1652.3	907.888	3215.69	4694.6
2	20	1	92N24	CL1116	900.114	3954.1	1225.43	2072.89	2203.5	7219.53	1431.27	3860.08	1899.24	1549.65	1152.81	1376.98	4634.77	4310.08	2171.06	3714.85	3457.1	3961.77	4537.92	2479.6	8390.38	3393.72	4395.08	6384.01	1130.31	1368.19	1767.9	881.781	453.539	1091.25	13065	4889.39	5177.53	7651.17	6371.12	3660.11	1154.82	7390.58	2889.88	2044.19	2688.59	1132.66	1276.78	1386.56
2	21	1	93B12	CL1210	1881.38	7073.72	2117.81	4627.33	4927.99	14536.3	4552.96	12461.2	5595.77	11775.6	7385.02	10825.7	7268.68	5831.78	3505.68	5541.62	4590.26	6425.5	9672.58	5221.83	17320.7	6189.5	7722.63	12637.3	5676.49	8097.43	11285.6	10475.4	2971.68	12152.7	28333.7	10794.8	11930.6	15177.8	12912.9	7533.03	4722.42	25233.2	9155.4	7239.9	11856.2	3888.33	7198.13	9868.23
2	22	1	93F12	CL1318	232.98	965.004	442.413	452.048	544.689	1312.16	524.323	1100.43	711.128	1497.6	903.769	940.587	475.416	464.042	402.71	938.94	731.233	940.299	756.27	512.662	1174.62	431.185	602.354	799.747	1178.21	655.716	727.298	376.126	265.228	557.762	2551.97	900.268	847.226	415.758	469.443	289.328	214.494	911.879	482.552	272.825	480.141	337.899	222.609	259.41
2	23	1	93J12	CL1433	1353.39	4067.92	2124.91	903.193	637.012	1852.05	759.68	2404.94	1138.25	1642.56	1390.07	1432.03	1443.04	1673.05	942.458	2273.99	1098.86	1729.38	2169.38	1573.08	2720.02	1103.59	931.06	1655.59	2496.85	1637.4	1231.87	1038.69	1027.27	1660.06	2580.49	1418.79	1280.66	1954.56	1334.37	1205.84	479.456	2795.89	1367.57	1286.18	1606	1522.61	722.523	812.267
2	24	1	93N12	Blank_M12	73.1743	145.09	94.6324	35.4286	293.46	67.6671	256.913	83.9771	150.954	132.597	259.747	112.758	176.236	118.367	81.1125	56.998	133.108	65.0732	53.457	88.7684	37.273	89.4187	33.7523	77.7635	118.609	172.401	115.524	237.668	205.368	158.491	71.1983	76.4773	18.3465	172.378	207.218	263.383	1028.48	138.075	103.121	61.1383	217.928	104.084	385.99	268.641
2	25	1	93B24	CL1223	2186.35	9580.41	2721.97	525.613	365.882	1150.12	306.933	1227.21	543.798	1152.86	1134.39	1053.33	507.613	648.683	495.896	1626.19	752.265	1399.68	1081.01	826.503	1782.05	801.745	796.973	1231.07	1607.54	1005.03	1022.51	235.924	439.653	426.79	1841.75	1023.33	994.102	90882.5	68082.8	73763.9	57513.6	89407.1	81276.2	1086.38	1907.6	1282.68	73617.8	87638.7
2	26	1	93F24	CL1332	384.919	979.502	539.068	339.493	374.012	894.519	346.355	586.717	295.425	952.927	706.766	700.683	441.13	435.761	617.548	1695.37	1081.41	1409.31	1093.46	724.938	1378.58	394.778	474.019	550.455	710.803	601.022	550.603	218.975	166.642	430.413	538.14	515.546	415.567	402.733	149.988	236.019	242.124	667.339	370.677	610.237	576.788	182.303	242.653	970.707
2	27	1	93J24	CL1447	581.743	1609.94	781.117	558.566	564.081	1299.51	594.293	2326.16	994.148	1472.72	1106.97	1033.04	879.649	775.331	677.986	1867.23	1033.29	1445.07	1866.07	1342.95	3342.88	1255.1	1350.67	2112.95	1527.9	1271.16	1521.61	558.589	626.723	783.113	3161.15	1390.85	1394.5	1246.66	899.158	779.747	844.285	5858.24	1871.94	848.86	1169.82	895.749	711.929	668.697
2	28	1	93N24	Blank_M24	139.836	61.1453	62.5954	211.903	298.272	87.7076	275.129	40.6372	137.743	282.926	154.88	184.29	81.2003	87.0388	91.3359	16.4283	43.1477	39.0111	7.44561	145.72	93.8721	137.492	79.2514	53.6923	115.716	260.804	140.07	297.317	156.821	204.411	91.8162	107.327	105.807	214.279	60.3723	310.417	207.82	97.3727	239.146	300.519	265.275	193.749	518.628	283.772
2	1	2	87J12	SMLC18E01	2193.62	8135.62	4678.33	871.043	2208.81	2321.15	1328.89	2683	2246.2	2837.11	3483.56	4742.79	1846.15	3204.68	1524.63	3380.75	3953.5	1968.9	3989.78	1571.83	3947.37	2989.62	2311.16	3245.87	2921.59	2769.04	2489.96	1595.89	1780.3	2074.29	3550.06	2670.99	4490.4	2113.61	2187.89	1456.37	971.1	4559.64	4126	2825.37	2637.68	3421.98	2095.74	1913.95
2	2	2	96N12	SPOTTINGBUFFER_N_12	65.5665	39.8683	84.1425	227.277	86.1703	116.717	258.22	318.235	142.33	139.71	168.689	2652.02	140.47	31.0509	68.1771	47.2428	48.8783	101.498	13.946	130.304	90.5162	68.3769	103.79	74.5629	115.117	197.489	240.622	159.199	73.8375	153.593	119.403	64.6006	16.9356	236.383	139.891	238.128	248.15	79.3574	478.971	230.86	224.136	133.666	260.816	580.8
2	3	2	87N12	SMLC20C08A	23046.1	51803.7	30084.8	825.582	2274.17	2980.7	3142.31	5653.75	3201.71	1811.68	1809.25	2859.95	5483.22	9269.2	3860.53	8823.28	10544.9	6928.52	6020.05	2982.08	7950.03	8336.87	8114.23	9693.08	1992.41	2973.76	2200.51	1377.06	780.973	1702.18	8609.16	4045.65	5103.48	2329.53	2414.79	1680.79	619.211	2617.88	1432.15	1428.97	1327.03	873.024	1559.38	2344.93
2	4	2	87B24	SMLC13A07	39.1838	78.142	116.68	178.592	260.574	254.536	269.602	132.168	137.346	242.613	179.189	804.987	155.115	146.016	64.6665	92.4609	89.9786	113.812	53.8806	130.325	68.6486	190.839	191.864	59.8664	147.686	163.373	295.035	281.039	408.552	205.318	99.5959	109.839	23.3035	156.2	89.5366	285.267	377.554	146.441	249.466	236.873	313.71	159.817	525.186	467.948
2	5	2	87F24	SMLC15H02	235.772	791.155	528.885	336.543	585.523	597.359	263.486	699.633	533.702	768.438	684.757	924.182	460.608	632.99	358.299	623.724	965.333	405.38	828.096	425.188	1032.69	936.696	713.387	749.616	499.543	557.222	450.5	304.615	389.143	485.44	786.977	493.231	777.202	571.8	278.895	356.842	318.858	810.323	808.23	464.69	516.906	349.07	477.519	409.805
2	6	2	87J24	SMLC18G02A	3917.42	210.468	359.703	157.577	399.517	265.315	209.563	529.941	421.988	444.5	280.066	368.429	226.141	311.279	199.962	377.776	270.837	186.752	415.627	253.104	339.62	259.675	192.315	331.323	403.457	368.571	381.808	296.522	161.238	339.355	497.789	439.669	336.351	334.986	396.595	251.529	247.345	418.512	632.865	553.152	222.002	700.493	232.187	286.422
2	7	2	87N24	SMLC20E08	173.512	421	307.132	313.647	439.261	349.819	215.517	359.891	327.451	1599.62	1466.63	1742.04	285.275	248.912	240.721	295.452	370.816	184.674	354.725	292.993	501.72	361.168	298.218	254.849	503.766	309.609	273.225	305.767	341.289	450.105	232.128	324.911	406.885	482.906	228.978	357.942	339.434	731.018	522.751	335.715	406.225	299.62	291.285	249.745
2	8	2	88B12	SMLC22F09A	96.3364	101.845	149.428	135.46	256.636	220.775	245.045	105.561	110.71	255.008	342.475	281.782	142.522	131.814	68.0827	130.595	62.8287	460.728	130.79	33.7482	114.001	68.1668	85.8043	32.3802	270.227	218.612	298.69	309.315	336.498	270.908	219.204	89.8395	140.742	141.868	58.0779	322.921	383.153	100.194	425.651	129.364	214.94	175.529	312.69	582.746
2	9	2	88F12	SMLC24H05	5021.86	18151.7	6518.08	8576.4	14841.3	30146.3	5103.4	4968.07	4744.12	8887.38	7707.33	9740.57	4026.91	9209.39	5802.53	6515.69	5474.45	36637.1	11456.8	6539.5	10992.4	7958.54	4357.5	7541.21	2999.27	4818.78	6672.19	6429.22	5044.17	6072.49	6447.81	3578.68	10187.1	5542.8	5974.33	3941.02	1964.12	7116.34	4547.87	3505.62	5385.52	2553.47	4428.55	7044.55
2	10	2	88J12	SMLC27B02	1223.72	2597.87	2317.37	1436.66	1438.96	2462.12	1008.22	2691.63	2101.23	3744.78	3463.43	4594.44	1034.95	2036.66	1260.42	4026.25	1969.77	1720.11	3745.59	1475.85	2952.12	1695.03	1359.09	1645.58	4249.46	3101.65	2470.94	1798.59	2273.44	2687.36	1943.81	1781.68	2950.19	2630.29	1641.02	1603.83	1037.53	3826.4	2910.31	2122.91	1963.87	4148.43	1672.87	1425.15
2	11	2	88N12	SMLC29G04A	26418.3	50702.3	27278.1	55000.7	70570.6	80491.2	67893	53689.9	42091.7	41642.4	43263.3	55126.8	39415.4	49869.1	60852.4	78578.3	69804.9	54976.6	57451.1	66633.4	44230.5	44517.3	44200.4	55956.1	52230.4	64166.6	68494.4	56588.5	53193.7	45251.8	48057.4	35550	59082.6	101123	76244	71186.5	69735	76484.3	78511.7	58593.7	61368.6	58793.4	60029.2	54988.7
2	12	2	88B24	SMLC22H05A	106.305	122.632	171.37	159.691	124.272	56.7122	235.917	27.1215	73.1764	181.87	111.816	106.714	158.221	80.5111	56.3587	586.61	81.51	144.868	161.561	100.574	218.759	68.95	72.5369	80.651	199.467	167.962	113.181	151.486	109.359	178.99	158.473	145.96	116.205	43.9447	149.21	313.186	104.274	178.759	169.189	26.7131	159.386	58.9127	265.592	247.245
2	13	2	88F24	SMLC25B03	1021.92	3434.02	1116.07	1693.28	2576.41	5779.67	3156.78	7765.58	3080.58	1497.11	1103.15	1768.7	8584.39	8369.18	5806.85	10975.2	12137.3	10774	5833.64	3237.36	8553.36	10571.6	10241.3	13348.8	2481.94	5021.88	5551.61	4831.77	1870.26	4774.04	15346.1	7140.93	10474.4	6478.33	4191.99	3515.26	2520.2	11595.2	4832.86	2032.19	2805.99	1709.66	1978.29	2966.49
2	14	2	88J24	SMLC27E05	28.124	35.5788	137.032	151.048	208.778	65.0767	307.055	141.61	60.3559	470.582	307.173	226.701	174.416	131.123	81.7317	96.5988	122.158	122.6	52.9215	146.864	57.2451	165.88	91.2743	63.6681	179.869	235.861	220.843	270.323	137.228	318.49	28.2374	80.468	199.577	199.526	128.712	150.035	114.209	246.4	263.327	64.285	225.704	65.9345	259.568	680.117
2	15	2	94N12	mCD037188	576.845	1103.81	1238.78	462.068	758.108	1219.86	438.777	602.923	443.648	2332.77	1588.1	2257.95	635.488	975.071	681.765	1180.92	1005.07	801.6	1782.9	1145.13	1645.89	945.846	741.389	934.376	1150.84	1013.84	1228.55	1221.67	1085.95	1671.64	1370.6	811.394	958.514	819.319	288.471	462.955	371.385	1926.06	1084.71	1080.74	1064.12	778.167	847.515	1020.24
2	16	2	88N24	SMLC30A01A	670.13	1683.05	964.944	666.93	658.935	1177.64	530.073	1506.87	861.534	1034.03	986.254	977.261	544.513	800.887	470.253	1434.72	888.861	704.322	1065.77	787.78	844.389	923.363	686.558	906.458	1241.77	967.669	473.086	626.74	894.1	811.61	911.584	727.686	1128.23	1010.97	764.203	455.306	516.049	1689.18	1120.73	585.217	652.024	1331.42	710.864	512.745
2	17	2	89B12	SMLC31D10	46.0003	167.899	95.5055	182.611	204.079	137.913	288.029	143.138	113.721	655.547	613.423	565.454	121.678	102.283	96.6477	217.002	82.4078	94.8357	204.481	163.904	214.896	217.068	160.469	42.2884	322.282	167.821	87.7368	373.57	216.001	200.121	211.457	181.316	501.918	141.312	51.7144	95.8408	266.759	115.393	147.189	85.7711	191.452	139.119	96.6469	363.723
2	18	2	89F12	SMLC35A02	32393	47349.7	36827.2	24089.5	25882.6	57742.2	22738.2	30562.8	24911.7	18000.2	20122.8	25569	31140.9	38992.4	28671.6	20859.6	17016.5	20963.8	16421.6	10519.4	15481	25890.9	25881.6	34143.3	30617.5	41168.1	48721.6	30593.8	21237.6	32062.6	34541.4	28916.6	57340.7	53212.3	43999.9	34595.6	33795.5	61322.4	48675.1	29261.4	35446	25857.5	37171.4	47080.2
2	19	2	89J12	SMLC3D04	117.654	160.745	162.241	218.989	369.715	174.641	288.694	1079.16	174.972	246.347	313.637	119.112	90.9477	49.6884	68.3643	64.6815	105.184	137.178	28.7984	104.515	88.5544	197.248	41.6096	105.17	244.843	106.976	167.329	96.3526	215.639	189.166	237.515	180.033	251.24	87.9699	182.533	309.157	85.6836	72.9541	418.053	135.632	128.065	231.636	128.405	317.025
2	20	2	89N12	SMLC46C01	121.17	145.713	170.108	242.324	287.689	255.884	276.225	102.763	143	1085.46	773.021	864.825	99.6869	151.193	93.7452	152.808	140.67	130.627	51.5743	202.087	192.648	74.2795	86.2844	246.527	224.323	158.489	109.382	55.9806	265.521	102.892	201.396	137.482	16.3619	199.715	85.5607	291.662	119.062	301.604	189.345	22.8661	145.75	239.977	159.601	42.7129
2	21	2	89B24	SMLC31G05A	1253.34	5037.81	1997.71	1428.76	1086.49	2857.98	1119.4	3366.9	1648.57	2698.11	1775.12	2085.5	2615.45	2272.42	1371.96	3592.8	1908.21	3297.01	3495.68	1859.96	5260.92	1892.54	2250.65	3859.98	2826.97	2237.36	2555.71	1177.66	1066.03	1684.84	5303.15	2368.39	3088.27	2016.09	1420.17	1322.84	642.079	3514.09	1910.48	1127.17	1530.22	1604.16	1137.45	1180.99
2	22	2	89F24	SMLC35C05	1122	2115.1	2117.12	656.846	1185.68	1756.25	246.034	895.376	588.994	13235.2	9992.75	11066	689.81	1346.52	806.069	2174.95	1070.12	1951.5	2580.06	2171.79	2583.93	1116.23	625.318	742.339	2181.34	1293.22	1050.66	1003.89	1164.99	1219.78	791.1	644.279	936.106	1034.22	1033	721.651	402.443	1029.64	727.595	1229.82	1292.24	594.686	588.103	482.401
2	23	2	89J24	SMLC3E12	108.248	90.9647	140.47	162.608	151.939	196.168	248.928	51.9267	148.783	145.573	69.4003	147.851	89.0545	82.4459	59.1521	120.492	136.073	146.822	191.171	73.3314	64.5924	44.3077	259.875	45.896	154.859	169.459	271.478	159.922	317.001	47.4051	111.205	212.915	18.4858	88.7594	42.9834	244.483	106.651	205.745	326.453	258.441	155.493	116.256	311.159	215.355
2	24	2	89N24	SMLC46H10	185.634	275.691	227.578	234.448	376.711	199.967	318.445	92.4583	149.031	380.475	240.949	233.461	76.7826	85.0242	154.122	261.086	101.366	145.063	268.188	161.909	356.49	140.562	207.462	84.2466	308.811	388.565	158.097	145.787	190.838	280.033	158.032	320.819	160.195	244.386	153.199	219.921	101.57	626.11	301.639	263.005	295.363	250.596	183.788	88.83
2	25	2	90B12	SMLC53H12	839.997	2879.14	1181.34	443.428	441.975	958.46	391.848	1133.49	481.143	738.756	680.552	723.74	872.776	970.03	628.211	1078.05	774.092	1215.79	1196.24	990.236	1895.26	887.88	1151.46	1701.83	1401.03	1143.76	1013.08	425.288	410.695	731.99	2503.05	930.039	1166.31	593.006	268.045	373.75	382.538	2082.21	1068.32	479.672	636.018	518.994	446.037	468.605
2	26	2	90F12	CL31	1106.08	3675.63	1123.94	1091.43	1059.93	3024.91	1079.99	2656.44	1222.76	1514.78	1063.77	1173.7	3770.63	3319.53	1665.08	2770.47	2377.1	3208.14	3611.71	2888.15	7523.08	2048.1	2474.28	4255.34	1029.35	1370.6	2314.12	2241.23	744.36	2735.36	15723.5	5956.14	5342.07	5842.48	4284.37	2216.69	1390.53	8956.97	2558.39	1898.29	3533.61	1815.4	1061.16	1731.61
2	27	2	90J12	CL153	566.157	1757.09	814.672	1132.81	913.612	2735.11	837.131	2544.58	1092.92	1435.3	1642.78	2060.38	1418.4	1237.73	696.788	2070.41	1338.38	1673.23	2011.62	1410.49	2589.69	1498.78	1513.24	2362.63	1431.89	1194.57	1669.11	481.699	620.129	566.379	3519.29	1472.42	1634.71	1178.4	912.624	574.081	437.853	2429.01	957.698	531.353	665.335	697.249	571.351	1067.53
2	28	2	90N12	CL264	174.003	82.879	153.3	217.77	273.904	101.565	162.811	86.4979	65.4486	149.293	143.537	213.087	125.928	57.2659	104.207	20.4644	73.997	13.3105	37.4393	140.72	94.8811	169.798	18.4698	139.152	152.803	155.761	198.829	132.222	237.439	56.0476	130.479	132.777	116.021	119.089	69.9957	251.642	279.069	205.54	292.653	68.6158	290.83	238.888	354.016	173.364
2	1	3	84B12	SMLA32E04	167.835	114.173	102.365	257.705	231.675	157.66	49.6258	29.3261	79.4075	153.401	114.667	1540.72	21.4589	58.2604	118.29	104.49	113.917	121.179	55.5735	82.4127	131.786	23.732	42.7347	40.9153	31.9389	97.8374	222.467	402.629	364.206	137.571	198.459	162.574	81.7557	259.328	67.5103	269.221	101.445	108.126	111.84	740.876	16.8517	75.0735	366.269	198.821
2	2	3	84F12	SMLA36C09	149.704	28.4087	72.307	219.9	283.59	282.257	166.964	44.4979	181.006	594.797	570.507	1245.18	100.989	59.8016	80.7782	218.885	144.302	83.8771	281.333	233.929	288.201	88.7316	202.234	184.932	252.665	286.835	125.532	249.994	350.364	169.247	341.533	120.05	279.551	221.008	81.505	145.527	246.999	368.847	209.563	131.874	109.552	152.316	346.05	873.917
2	3	3	84J12	SMLA39G07	277.055	32.2847	83.3895	193.221	238.638	216.994	352.724	80.8374	93.5714	136.203	110.824	623.63	83.0668	139.611	55.8063	92.2501	52.8045	43.9928	29.8706	186.695	76.2832	133.418	99.1104	136.664	147.964	70.0823	133.409	73.4002	154.42	416.645	135.886	214.028	16.8452	198.085	254.31	331.809	266.761	77.7665	123.467	477.301	184.76	131.828	329.343	217.757
2	4	3	84N12	SMLA42G06	130.918	141.207	80.5724	189.784	178.998	195.814	246.398	87.9252	61.5069	169.017	224.583	475.08	102.886	251.486	139.716	43.6668	180.022	58.5742	92.9914	127.742	108.98	148.672	55.9325	130.419	143.401	196.748	295.891	199.516	156.171	172.41	135.081	127.827	90.937	133.865	82.1258	299.532	232.684	192.868	265.509	228.511	278.079	303.799	482.817	492.002
2	5	3	84B24	SMLA32H01	282.987	374.643	343.12	297.003	322.981	190.842	189.275	415.987	170.17	738.001	545.6	731.172	325.725	261.703	194.765	567.064	353.988	343.431	646.657	272.653	489.989	320.202	270.44	260.2	572.062	580.229	501.795	365.408	531.049	594.926	355.413	441.195	254.147	425.072	360.065	418.508	152.201	820.953	495.853	446.695	419.282	435.255	241.834	103.04
2	6	3	84F24	SMLA36G04	79.9783	89.4866	60.9253	124.578	207.623	293.272	245.776	100.558	132.955	99.6965	273.186	273.595	107.593	81.0488	62.7671	106.045	67.2952	48.7443	17.8468	146.186	216.883	103.805	66.1419	53.9812	220.549	155.431	183.467	224.216	372.654	109.911	185.584	137.588	26.4956	156.256	53.684	289.946	197.003	63.3937	124.494	1057.82	132.518	57.2774	378.556	640.904
2	7	3	84J24	SMLA3D08	473.76	1497.25	568.729	477.557	727.638	797.262	186.124	498.015	276.941	663.787	457.634	979.842	329.006	464.934	422.635	1042.44	704.131	489.753	545.671	299.429	634.194	1005.35	1002.35	1387.7	1454.78	1099.73	1144.09	180.875	404.692	314.631	414.029	268.121	260.603	225.069	272.037	227.531	218.822	596.573	412.474	213.422	226.359	248.852	179.171	104.778
2	8	3	84N24	SMLA43C04	992.778	2831.62	1852.11	740.905	1013.97	1482.09	660.094	1832.26	1462.77	1960.8	2045.43	1985.65	780.612	1008.47	774.265	1487.35	940.056	1285.78	1912.14	689.96	1442.34	1083.46	913.847	1163.03	1227.71	1198.24	1028.62	694.07	924.666	1156.7	1465.4	1286.35	1817	1240.69	819.355	723.193	614.741	2442.76	1786.14	895.363	782.145	1968.16	1188.66	1069.33
2	9	3	85B12	SMLA45H10	71158.5	84418.5	63888.9	9198.02	14452.6	25686.3	20079.3	43116.8	23690.1	12268.5	11358.7	17960.9	40070.8	41371.3	21483.3	35927.2	50510.2	31068.6	34497	21112	47071.7	42652.4	42276.8	53936	21042.5	31401.4	26051.3	12590.8	6186.66	14995.5	47912.2	23256.9	26863.7	9966.55	14066.3	7356.12	5252.27	18897	9893.95	8178.31	7354.39	5529.89	5899.29	10221.2
2	10	3	85F12	SMLA4A07	200.64	63.3164	91.143	99.2224	260.023	31.524	349.341	45.8332	227.781	88.616	84.9363	124.308	107.409	39.0654	66.5254	40.2689	70.0264	64.1656	83.2695	46.0979	58.4438	121.375	70.0032	15.7217	128.185	217.19	193.712	405.159	326.69	102.15	76.8907	159.729	41.0234	229.556	88.0194	221.644	137.279	247.259	216.789	283.373	111.787	138.571	450.222	588.884
2	11	3	85J12	SMLA52D08	454.523	433.913	553.992	311.24	743.766	663.649	730.934	727.826	538.463	526.225	549.912	565.334	336.132	523.04	244.238	270.992	574.127	371.31	723.244	204.514	412.391	447.645	502.714	589.275	364.49	547.357	478.939	277.214	551.92	429.62	674.768	466.436	1137.95	783.882	422.318	793.171	655.515	1045.12	967.629	547.245	320.076	379.961	592.773	691.49
2	12	3	85N12	SMLA55E01	1561.49	4043.4	2792.44	2039.15	2311.33	4054.23	902.974	3127.35	1667.67	20061.4	18002.3	20473.4	1504.26	2496.24	1472.52	5055.26	2301.16	2480.71	5749.2	2539.98	4202.2	1774.95	1345.31	1702.86	5152.01	3597.65	2312.34	1597.16	3152.62	3043.31	1476.83	1321.34	2155.06	2836.64	2366.74	2209.02	1005.02	2641.82	3617.72	2873.94	2946.19	2868.1	1273.29	1387.12
2	13	3	85B24	SMLA46D06	241.18	85.6713	108.631	108.877	159.292	270.327	275.839	23.7585	206.679	119.138	148.305	43.4709	139.404	55.5609	60.6452	26.1223	98.6599	65.5835	114.204	105.003	154.609	122.359	148.346	114.448	181.918	180.555	225.536	160.841	295.343	245.298	149.799	75.9723	24.4338	118.909	81.7539	258.723	85.7255	98.4898	256.533	52.1901	71.8083	121.998	311.341	397.285
2	14	3	85F24	SMLA4E08	529.047	2744.51	791.087	625.18	964.941	1826.25	584.332	1397.17	630.988	415.805	293.583	436.098	1777.62	1919.42	1115.61	1503.68	1695.69	1535.05	2366.71	1260.21	3546.35	2259.82	2289.64	3840.98	541.657	875.662	936.516	443.947	197.055	521.503	3161.77	1154.36	1405.84	355.247	442.297	289.771	199.829	559.337	422.058	231.437	332.508	330.585	261.475	346.631
2	15	3	85J24	SMLA52G02	383.106	526.407	735.671	207.57	256.151	419.436	202.372	300.114	229.69	1755.12	1537.92	2299.84	365.794	324.784	258.704	492.813	437.804	382.629	889.723	533.597	984.888	398.625	216.318	418.749	633.747	644.183	699.369	742.998	719.692	1107.99	358.792	216.924	384.786	756.804	348.364	514.31	313.775	677.896	502.603	724.716	858.093	676.876	273.096	298.491
2	16	3	85N24	SMLA55H05	370.143	557.147	586.699	188.007	269.32	412.534	249.008	374.064	249.819	322.974	231.794	219.533	362.34	325.763	367.387	625.994	473.607	566.432	379.514	263.683	587.742	312.119	338.425	278.859	548.79	472.326	435.975	316.502	415.386	380.492	542.69	652.208	264.396	570.399	327.76	273.277	412.764	1126.54	641.915	288.655	306.08	554.718	175.82	139.641
2	17	3	86B12	SMLA59A01	97.2517	191.048	153.082	212.045	192.504	175.989	210.318	592.523	161.004	81.6203	139.823	133.059	171.414	76.183	46.8874	20.8457	37.0758	45.1631	73.544	106.568	28.714	105.27	78.4077	56.944	129.979	189.05	122.524	95.3438	249.724	39.7703	121.594	232.118	138.112	42.175	78.4202	173.095	133.295	42.7822	136.048	236.863	23.8255	73.1575	540.963	63.3355
2	18	3	emp	emp	119.663	69.5557	177.102	171.159	329.431	82.9748	144.247	491.105	220.137	313.928	208.178	213.205	108.65	33.9291	84.0373	61.9742	41.024	112.41	39.5544	152.794	39.8453	50.5193	99.9872	74.2582	131.678	223.205	88.0249	77.0613	235.068	113.213	104.621	95.0568	115.209	82.0635	87.9373	189.455	34.9835	140.579	76.8809	67.9047	108.075	27.2004	86.9517	247.448
2	19	3	86F12	SMLA61D02	78.4907	44.3298	130.662	225.379	256.603	82.9943	280.322	500.684	77.1737	142.919	355.05	42.2285	62.3595	79.9253	49.1847	118.402	93.9189	31.0702	39.4408	59.7229	24.5797	100.247	45.4394	38.59	197.505	68.42	226.956	84.1079	208.221	119.556	91.4246	38.2022	141.08	87.9521	34.4081	173.489	64.8585	99.5045	124.165	199.88	25.7625	143.659	443.52	244.037
2	20	3	86J12	SMLA8C09	297.168	348.792	470.264	238.235	228.625	353.442	287.275	338.613	245.171	794.845	888.983	1034.71	303.655	236.588	222.845	512.344	440.039	266.886	587.924	326.831	525.666	467.279	206.165	248.716	488.195	432.683	193.817	256.662	361.934	443.179	538.209	223.375	391.905	600.587	348.829	398.962	204.079	630.881	550.196	421.376	362.749	424.994	259.593	214.02
2	21	3	86N12	SMLC11C04A	2086.99	8727.32	2834.88	5975.24	6715.79	23912.8	1906.22	5457.42	1921.53	2327.32	1280.33	2307.98	37084	46442.6	33791.4	54994	51507.1	52021.4	41188.9	25747.5	40328.7	26900.5	31638	35706.9	19125.6	30229.4	40716.2	6501.42	2531.26	7387.22	33321.4	12660.7	16041.6	9798.31	7516.34	4405.92	12372.3	54083.9	21261.4	9958.22	13134.1	9992.41	3772.66	5858.73
2	22	3	86B24	SMLA59E02	664.334	2007.37	1123.89	673.61	598.161	2293.63	575.642	1122.54	603.767	1052.66	876.38	866.258	2514.1	2439.53	1528.79	2783.55	2410.3	2917.79	2159.72	1508.29	3220.93	1777.76	2245.66	3530.12	1240.59	1436.74	2151.13	892.979	597.187	1305.41	2629.32	1658.83	1894.66	1412.57	1055.2	731.06	776.717	3543.34	1783.37	2317.77	2421.26	1102.23	698.464	1140.97
2	23	3	86F24	SMLA62B03	502.056	1917.74	653.596	173.47	120.961	256.569	203.534	214.343	107.685	516.001	239.312	358.612	225.779	234.304	179.601	305.31	225.466	278.908	479.234	306.576	328.588	319.821	216.786	247.408	355.099	302.751	238.709	120.156	160.178	127.883	284.841	156.931	224.805	300.133	287.059	155.208	108.139	257.267	267.838	120.137	156.201	191.445	112.074	108.151
2	24	3	94B24	mCD036912	893.851	2589.02	2693.42	802.267	997.105	2711.95	653.652	1340.76	1241.3	3185.51	2225.41	2188.27	915.114	1495.79	1200.9	2500.04	1280.7	1977.18	3815.02	2092.35	3105.62	1318.52	1044.41	1691.01	3613.14	2078.48	2991.85	2089.6	1638.36	2862.71	2213.05	1624.52	1953.07	1742.02	988.332	939.909	712.594	3611.34	2293.62	2512.32	2406.63	2084.51	1492.14	1653.79
2	25	3	86J24	SMLA9B10	227.166	101.927	58.8671	318.077	268.174	262.584	285.595	22.6802	181.426	174.836	193.141	120.739	115.376	45.5974	178.005	73.3496	121.981	80.0566	42.6592	59.8498	72.0185	158.601	124.87	120.207	224.944	177.442	234.903	160.481	247.128	78.9099	126.008	66.4644	44.1099	107.984	39.1864	77.2694	101.009	30.877	170.333	155.677	98.612	138.212	167.299	299.451
2	26	3	86N24	SMLC11D08	4817.35	15342.3	5909.52	4844.63	4000.95	20152.3	2446.37	7334.8	3026.82	4682.94	2212.46	2941.08	12368.5	10875.9	5125.3	14011.7	13514.8	16677.7	43750.9	26410.8	47874.8	16028.8	19057.3	24944.4	8347.91	13632.7	26177.2	24947.3	6831.86	28047.7	39384.7	20187.7	16509.3	28973.1	26895.9	15666.7	5465.48	27910.8	8518.25	19684	25479.4	4582.14	11909.8	15888.2
2	27	3	87B12	SMLC12F09	201.837	637.559	252.059	238.369	244.706	334.143	261.012	410.72	386.652	3697.39	2954.89	3273.04	534.533	204.119	165.24	296.351	135.062	424.199	1123.41	665.499	1256.66	509.441	779.512	1053.77	296.407	422.648	479.322	716.393	229.441	656.771	4199.65	1628.4	1650.29	1787.2	946.782	999.915	237.913	1439.37	626.911	785.641	761.441	416.447	359.425	1385.16
2	28	3	87F12	SMLC14H12	471.532	727.64	747.778	596.236	671.236	967.764	459.591	743.287	563.296	1030.49	1274.95	1175.03	591.352	577.355	395.847	1010.21	742.109	786.56	1046.48	1130.72	1343.68	757.572	487.993	777.493	903.08	965.691	839.538	821.003	756.222	1314.61	979.865	828.869	759.747	1152.93	791.108	818.935	740.15	1834.66	1191.83	842.272	1021.36	725.341	631.273	582.916
2	1	4	80F24	CONTIG9007	9721.64	23618.3	9321.67	13003.8	30844.5	40906.3	25792.4	42967.7	25714.5	10805.8	8203.02	12541.6	38425.8	51011.5	40900.4	51975.3	67677.3	50761	57629.6	38802.7	55816.3	46623.1	46888.7	57419.8	54776.9	58899.4	59363.2	24164.4	13342.9	26220.7	53240	43352.3	65996.8	39379.8	49903.3	26982.5	32279.8	71579.1	57964.6	43517.2	47563.3	37810.6	20273.9	24605
2	2	4	80J24	CONTIG9128	973.824	2840.5	1269.17	2128.3	5436.14	7800.42	5824.96	11403	6297.91	1277.16	1528.27	2139.88	3954.24	5311.6	2973.03	4479.33	6203.6	3892.69	6400.49	2841.28	8029.7	6066.03	6091.44	9384.03	2177.49	2608.88	3112.36	1391.98	1197.2	2015.81	10718.4	3839.44	7278.38	1465.35	1477.12	997.546	1421.8	8298.43	3974.06	1476.51	1708.14	1855.1	3133.85	3940.23
2	3	4	80N24	CONTIG9259	1484.82	3613.16	1771.41	3815.75	8080.26	10632.1	9537.26	16275.8	9417	2254.68	2443.2	3347.56	6965.53	11347.3	4870.76	5435.85	7892.8	4475.66	9614.99	4562.23	12453.8	10409.2	10366.2	15433.1	3348.82	3631.57	4849.35	1316.36	1337.17	2070.64	30703.7	12982.7	16201	28470.7	32369.5	19683.6	3335.86	19087.8	8274.08	14227.3	11998.8	5165.78	3096.95	2821.01
2	4	4	81B12	CONTIG9401	722.133	1273.77	976.065	516.838	674.693	806.857	307.025	1482.05	728.368	1130.52	1251	1651.24	471.724	824.056	542.586	1584.68	1274.94	762.938	1406.09	691.886	1661.12	1173.42	1018.06	1407.44	1701.04	1479.34	878.575	854.781	1255.99	1310.28	2455.44	1083.78	2107.92	1068.26	696.011	655.889	528.609	1309.53	1150.66	966.38	895.629	1376.73	695.125	702.238
2	5	4	81F12	CONTIG9538	160.717	75.6861	65.6595	102.197	128.205	118.061	188.593	43.0683	158.724	130.116	106.999	314.744	173.339	128.442	99.818	32.0103	146.946	45.5128	49.7674	125.97	87.0529	152.108	113.519	44.1911	201.506	82.7271	213.739	97.6503	213.63	201.141	80.2591	87.3203	268.044	175.721	111.784	243.057	196.979	210.628	186.671	288.739	129.453	195.24	211.764	442.007
2	6	4	81J12	CONTIG9661	586.537	1436.7	593.96	808.403	2508.85	3058.42	2333.72	5261.7	2265.41	981.173	650.967	1554.87	2574.25	2830.35	1802.6	5405.64	10406	5690.93	13211.3	5506.52	18213	13263.7	12252.2	18442.5	3927.29	7988.9	10225.1	3507.3	1684.75	3728.06	10663.6	3762.98	5812.35	2567.32	2543.08	1747.2	746.378	2809.8	1401.08	2890.86	3254.73	1346.01	1573.11	2069.68
2	7	4	81N12	CONTIG9786	150.48	84.0242	198.865	194.562	226.179	91.798	355.333	33.6466	194.316	232.935	203.719	106.153	188.034	132.83	106.533	159.125	79.481	64.7998	37.1268	132.632	116.72	151.687	45.1644	173.785	158.179	237.985	259.028	117.743	240.799	71.9821	138.641	128.042	33.2257	55.0086	90.8766	275.143	127.726	237.529	379.734	253.15	91.5222	94.1049	412.183	275.749
2	8	4	81B24	CONTIG9419	89.8812	25.716	153.882	95.6688	242.123	256.758	289.543	127.038	222.591	42.9321	282.465	82.5923	168.355	111.28	48.0807	137.641	102.989	700.979	111.363	88.413	96.5201	70.1778	54.3525	176.737	186.128	164.056	169.799	169.769	276.4	263.239	155.212	68.2382	49.7194	205.994	77.5054	208.729	42.6439	213.743	226.37	227.306	65.4257	141	539.437	391.48
2	9	4	81F24	CONTIG9553	229.336	1189.19	382.069	428.712	832.887	1375.34	776.284	1629.03	824.938	866.83	729.448	1197.88	1843.54	2670.58	1589.42	1336.02	2046.96	38541.5	2346.75	1082.55	3640.68	2293.88	2333.33	3452.22	441.463	652.714	811.594	161.798	215.072	168.819	1355.99	623.269	740.69	942.136	908.316	664.772	227.444	891.358	518.202	329.414	222.566	195.205	244.527	228.29
2	10	4	96F24	SPOTTINGBUFFER_F_24	53.6237	76.4691	89.9203	137.286	173.344	162.914	211.87	12.5765	122.766	88.2438	141.79	35.2502	187.757	76.8322	44.3045	80.122	91.6153	49.5872	125.058	113.378	44.8175	179.098	115.498	31.3943	229.801	171.585	304.755	386.871	251.181	119.447	73.4141	122.236	169.249	305.991	26.4824	208.555	301.773	366.136	308.479	340.699	185.796	113.364	540.452	239.434
2	11	4	81J24	CONTIG9682	821.68	2634.92	1458.79	3661.88	7288.01	9767.99	8980.71	18115	9054.13	2117.29	1656.75	2733.89	5609.53	7393.92	3970.59	3428.54	6228.75	3582.35	7253.11	3643.87	10117.5	7703.73	7469.65	10662.1	2691.7	5409.08	6972.46	2821.71	1517.8	2810.28	17514.3	7416.4	9746.05	3269.5	2568.82	1927.01	1003.12	5979.52	2484.58	2881.7	2972.07	1604.43	3731.46	5237.13
2	12	4	81N24	CONTIG9800	489.063	1031.41	1019.97	425.874	640.501	801.723	489.751	870.057	463.73	2760.8	1392.84	2463.36	443.965	770.812	570.35	1537.75	976.846	1517.53	1502.9	816.069	1315.49	659.875	653.526	661.658	1507.54	983.038	1121.78	1063.87	1021.92	1354.77	907.364	661.764	836.223	1382.6	1084.22	954.113	718.251	1923.88	1591.84	1018.59	1187.67	1142.35	479.935	585.698
2	13	4	82B12	CONTIG9878	196.638	28.5451	106.829	152.734	120.459	159.63	266.628	77.5154	177.879	273.909	56.9758	21.4432	69.8674	70.2517	125.042	58.1709	26.9159	123.335	8.62102	123.078	147.892	93.2046	58.7792	37.7297	168.417	34.5011	190.192	169.062	441.099	102.398	67.6618	156.007	58.5269	222.491	128.728	329.242	142.795	187.023	233.271	203.595	201.73	172.803	608.424	414.224
2	14	4	82F12	CONTIG9989	2081.51	11563.9	5617.87	163.109	273.488	344.829	187.392	354.085	250.117	286.113	259.779	400.643	318.291	533.184	259.245	1188.19	1077.8	947.947	999.481	502.591	1306.56	733.299	581.128	718.348	290.214	336.93	383.64	207.6	174.491	180.673	646.02	250.832	561.182	348.893	504.81	260.905	113.848	342.434	209.208	329.929	186.492	136.783	196.487	201.864
2	15	4	82J12	SMLA13A10	85.5464	103.467	111.6	247.228	88.0847	178.18	313.3	57.1001	39.931	181.98	309.78	78.4647	144.665	29.1841	85.1145	103.639	67.8248	19.8169	78.4719	151.263	61.0759	77.3709	42.8662	78.8455	172.215	89.3524	208.75	109.981	428.745	257.233	131.843	151.987	11.4293	123.827	183.206	312.012	114.218	161.895	86.5531	260.703	134.784	203.181	338.571	341.411
2	16	4	82N12	SMLA16B08	170.211	171.184	45.2148	161.838	245.641	179.492	264.78	38.4359	163.786	34.7179	189.746	216.763	122.701	76.181	52.8264	149.878	63.8517	7.21947	28.6212	96.4178	40.4481	78.2413	178.759	42.6953	202.064	121.757	286.22	48.3547	326.583	83.2957	150.779	94.5525	29.2354	123.32	41.4124	254.593	130.428	34.0031	302.588	123.546	51.8355	136.135	278.734	72.3758
2	17	4	82B24	CONTIG9893	2837.02	10026.8	3725.51	10736.1	15297.2	36896.5	15459.8	30461.7	17021.7	7394.64	5104.39	7496.71	13323.9	16688.3	9949.92	14669.3	14141.5	14739.4	27310	14559.2	36834.1	19028	19408.6	28537.1	13692.2	20953.6	26910.3	16153.4	6686.13	17309.5	38374.3	30627.1	37174.4	19663.2	19100.9	10577.3	9787.74	45900.3	20663.1	14007.5	17117.1	10834	12834.6	17230.2
2	18	4	82F24	SMAA25592	11538.7	43872.2	15795.2	8225.17	9281.16	23104.1	10085.5	20062.1	13045.5	28833.9	23312.9	32961.9	19501.5	20719.8	12026.3	30464.4	23824	30650.8	30753.3	16635.2	31387.8	30173.3	30863.5	47453.6	35760.2	50351.4	54483.7	47561.8	27982.2	43723	56601	46508.4	65464.4	84144.2	72773.3	72248	48480	71024.9	58305.9	52484.4	60727.3	62450.4	10343.2	14544.6
2	19	4	82J24	SMLA13D07	1758.96	8329.27	2152.56	3199.69	3427.14	13837.3	2882.74	8960.93	3362.82	1789.04	1089.17	1678.1	11907	12565.5	7360.05	14151.4	14093.8	17320.2	30734.1	15511.9	41153.2	19353.5	24362.2	36233.9	15968.1	26070.6	36017.9	10352.4	3659.9	11371.8	34696.2	17482.1	23911.4	3619.91	2817.53	1470.43	2386.65	15861.3	5509.56	2202.06	3335.72	2900.22	5338.89	7204.35
2	20	4	82N24	SMLA16E05	447.206	1157.39	633.961	196.591	325.96	431.006	167.962	305.322	264.314	759.547	779.249	742.229	200.15	473.803	282.81	903.238	472.397	484.938	832.547	547.019	625.03	319.787	339.116	429.624	993.394	692.59	436.998	435.976	519.31	594.077	383.879	423.798	434.431	674.27	454.561	490.874	273.994	763.541	490.506	482.887	562.558	712.17	249.873	249.942
2	21	4	83B12	SMLA20B09	124.25	120.268	47.5563	104.196	249.843	118.795	326.546	255.778	214.949	350.339	291.244	81.279	150.974	53.4291	77.0444	84.9472	33.231	47.6553	51.9171	119.611	37.0103	114.658	133.264	14.2791	123.704	149.795	99.6438	179.841	143.834	195.087	80.7884	125.845	144.821	104.819	81.8446	285.885	100.55	281.289	182.801	161.723	161.944	216.703	348.443	375.878
2	22	4	83F12	SMLA23G05	1761.33	5895.39	1915.46	197.815	210.667	262.336	166.495	331.461	183.775	791.867	476.253	596.663	244.85	322.485	210.173	779.032	382.441	648.113	514.476	468.214	751.572	316.742	336.41	526.5	512.698	355.997	382.934	160.001	174.319	250.428	333.858	297.291	230.155	329.371	245.707	239.781	154.222	920.015	337.395	130.557	230.139	320.803	127.655	136.97
2	23	4	83J12	SMLA27D09	171.875	59.5148	142.026	206.154	264.926	111.915	270.317	173.463	22.9208	302.041	272.974	62.8086	48.7538	56.6102	141.011	119.147	108.531	66.1592	62.9875	162.846	89.568	154.101	29.2248	229.237	138.593	182.422	216.793	120.883	197.515	127.997	144.487	80.0225	48.702	352.586	57.7064	170.194	89.3348	237.397	365.738	235.643	156.1	216.233	227.653	264.285
2	24	4	83N12	SMLA30C04	154.656	114.529	133.655	222.666	310.438	193.605	357.372	121.114	177.295	632.038	298.647	162.703	155.235	18.7259	124.669	125.912	194.072	51.9771	60.5245	128.807	141.354	73.1924	63.096	50.8244	242.433	209.331	239.992	315.813	64.4756	159.037	172.312	124.762	47.1011	129.132	59.4608	109.767	184.869	388.973	216.153	95.5279	88.7146	225.324	170.682	316.671
2	25	4	83B24	SMLA20E12	230.327	654.399	446.168	219.995	118.283	166.35	188.703	104.615	76.4102	82.4579	89.0337	122.041	147.342	61.6102	138.708	262.453	158.366	149.151	178.513	94.9866	160.164	101.408	151.42	168.332	106.411	116.856	139.262	80.2624	106.792	113.855	99.7232	93.7724	88.2675	140.125	165.078	227.722	98.2851	135.596	147.847	113.641	126.195	87.0013	117.074	129.32
2	26	4	83F24	SMLA24C06	633.819	2664.76	1166.87	577.383	601.51	1882.49	409.987	1262.48	735.213	953.155	598.698	535.969	630.603	884.874	611.459	2677.31	1608.56	2855.95	2064.59	1207.97	3040.63	1449.59	1851.03	1836.95	2051.29	1937.49	2720.18	917.374	436.831	1043.9	3163.98	1373.51	1620.74	1515.04	1205.17	933.558	537.07	2990.41	1416.1	992.506	1094.53	834.605	527.692	677.066
2	27	4	83J24	SMLA27H06	97.4552	158.477	20.3544	200.732	297.837	148.611	288.282	93.5317	143.822	49.525	159.887	135.629	142.5	51.1649	111.689	46.5446	53.6176	28.3583	61.6536	118.228	60.6539	15.9506	81.5319	31.7875	152.147	218.545	287.303	136.28	21.9163	272.468	100.535	110.849	18.3947	13.5181	106.683	204.158	84.136	40.1226	157.142	237.06	194.013	137.811	299.19	1383.58
2	28	4	83N24	SMLA30E10	1150.14	4322.53	1710.96	860.018	553.186	1962.85	357.118	1260.41	848.502	1251.16	892.754	837.57	1625.12	1630.6	914.414	2292.17	1134.05	2197.15	2200.17	1453.21	2534.75	988.402	1035.04	1942.31	2195.77	1324.53	2017.59	1110.29	695.474	1313.12	2064.68	1316.04	1112.49	932.146	504.409	633.798	499.54	2892.5	1566.91	1078.57	999.565	897.773	815.387	1158.83
2	1	5	77N12	CONTIG7813	5324.89	12245.5	5544.15	17676.8	40119.3	50942.4	27222.5	43769.1	25774.1	7058.25	5135.12	7869.21	30095.1	40534.1	21234.1	24282.2	40108.4	19593.5	51807.3	25084	46424.6	43395.4	41849.2	49991.9	24890	35408.9	47278.9	9975.98	5453.74	11228	42290.7	28638.1	43322.8	26407.9	30185.6	16993.4	13254	52715.9	26837.8	40972.4	35419.5	10117.3	26539.4	28835.7
2	2	5	77B24	CONTIG7465	3294.01	8936.45	3659.93	2176.87	5769.8	8215.59	3186.54	6248.37	3281.34	831.114	615.494	1067.8	1698.56	2214.5	1281.75	2559.16	4367.18	1976.42	5144.8	2414.8	6894.46	4842.28	5272.12	6623.54	1122.85	1869.16	1954.38	799.185	467.87	754.428	6196.91	2270.56	3345.75	3800.63	4633.72	2461.14	1581.12	7511.41	3428.6	3600.28	3463.62	2202.4	857.998	821.928
2	3	5	77F24	CONTIG7586	37784	60760.3	40895	12710.6	26041.9	41227.1	43670	66548.5	47054	20944.8	19826.9	28984.4	8634	9504.33	5630.45	5503.17	9569.18	8039.56	4465.29	2288.29	6878.39	10206.9	8921.21	10946.8	3001.53	3719.21	3319.36	500.152	289.936	366.41	1542.38	1194.8	905.823	267.638	384.715	327.472	853.551	3968.8	2105.61	1978.14	1827.5	1125.1	630.536	848.626
2	4	5	94B12	mCD036900	316.776	656.528	721.618	222.903	487.188	869.545	257.456	256.612	228.096	894.182	768.899	750.269	447.8	636.591	299.7	657.76	860.354	501.857	1079.4	411.145	1340.11	679.479	546.996	596.777	755.489	698.355	1016.34	818.292	908.35	1225.86	767.191	492.603	619.655	377.861	228.766	430.416	404.959	1241.17	594.241	922.462	672.122	548.68	468.017	531.006
2	5	5	77J24	CONTIG7712	1592.07	5838.59	1690.14	664.818	1962.58	2387.79	18398.4	39045.9	21755.9	948.087	844.199	1367.12	191.818	289.244	215.269	217.909	202.699	295.426	216.085	166.132	255.093	171.572	228.254	193.224	151.787	152.485	68.1184	92.72	177.002	75.1487	125.522	87.5114	114.332	135.951	126.976	121.844	110.761	158.771	125.436	129.986	85.5399	121.406	133.705	50.0899
2	6	5	77N24	CONTIG7828	1700.16	5157.66	1766.1	1145.93	2520.17	3718.14	2850.92	5232.82	2583.8	1594.12	1508.94	2045.24	2616.55	3982.15	2091.84	5590.56	8984.58	5839.89	12715.9	5667.61	18053.2	12134.1	10481.1	16669.1	930.355	1477.79	2076.27	2161.87	1155.08	2240.51	11188.3	4209.55	5704.31	1788.24	1868.16	1182.09	510.593	2695.27	1363.82	2861.75	2796.03	1292.18	1505.69	1517.71
2	7	5	emp	emp	177.222	120.835	124.299	174.352	246.221	41.8284	274.092	89.2854	167.162	251.9	271.237	168.852	112.824	62.5056	130.479	125.847	64.5496	29954	138.424	103.666	107.845	146.088	22.4348	95.5932	250.687	49.506	158.043	139.787	268.444	93.4722	83.5351	83.0672	67.5539	281.299	140.679	298.209	10.0156	211.174	219.674	153.721	180.358	205.298	312.141	344.298
2	8	5	78B12	CONTIG7930	276.092	1369.62	364.405	640.435	1683.59	3362.31	950.12	2383.26	1231.56	182.83	161.194	266.035	250.969	290.753	194.853	371.894	421.177	39963.9	803.162	184.283	794.831	386.6	638.498	593.582	183.452	257.455	199.574	129.59	94.1391	95.3229	1420.63	492.988	983.077	330.104	302.78	407.812	552.572	2741.16	1464.63	454.326	366.05	256.676	379.292	486.356
2	9	5	78F12	CONTIG8041	2139.76	7191.32	2570.65	3776.59	6492.76	10708.1	6714.71	12702.5	6787.07	2691.43	1912.06	2463.65	7277.04	9451.68	5121.54	21669.2	27496.6	22013.3	17239	8829.71	23493.1	17994.6	15981.5	28144	3395.06	5592.14	7208.2	1658.58	811.901	1771.48	30492.4	11891.1	16494.2	3171.72	3138.7	2032.54	1618.37	8812.62	4229.69	2356.28	2685.2	1044.67	6005.58	7068.78
2	10	5	78J12	CONTIG8171	773.319	2518.71	739.029	120.529	150.637	185.292	148.182	224.981	156.554	397.31	372.316	505.256	121.416	207.408	131.662	292.815	334.427	247.164	203.524	177.226	277.85	163.621	177.334	274.862	267.556	157.169	194.531	157.706	103.977	242.848	804.173	504.309	387.073	270.148	387.104	264.423	167.57	205.919	318.244	164.831	311.216	184.741	136.061	85.9067
2	11	5	78N12	CONTIG8294	711.972	1938.83	1563.23	637.859	916.813	1301.41	546.382	1054.55	812.232	3063.91	2310.49	2994.29	734.628	1152.45	845.885	1913.43	1374.47	988.928	2809.29	1134.57	2565.9	1094.79	848.67	1330.62	2089.33	1871.81	1915.36	1573.79	1682.35	2635.98	1207.73	1017.44	1362.16	1873.12	865.815	1015.65	767.533	2555.23	2042.66	1621.45	1949.93	2274.44	831.049	919.294
2	12	5	78B24	CONTIG7944	8110.15	31653	9823.65	29842.4	46507.4	79957.8	54351.8	68675.7	50102.9	21287.1	14782.7	24266.2	257.734	437.5	270.533	490.271	407.782	401.594	938.188	351.741	421.842	441.213	404.803	543.222	255.328	294.633	296.164	118.977	121.732	152.9	193.767	181.821	238.874	144.405	106.835	134.612	121.836	130.617	320.046	265.308	164.544	159.119	93.9354	85.7449
2	13	5	78F24	CONTIG8058	2873.52	7498.61	2989.44	4811.24	7820.36	12312	7575.08	14752.6	6779.02	5321.82	3497.62	5720.82	10202	11475.4	8573.14	10139.3	13919.2	9430.22	19281.6	11351.8	26619.7	15883.1	12469.5	20879	4457.07	9620.73	12194.9	7001.98	2791.98	7887.23	35536.7	19047.4	23737.5	11716.7	10153.9	5937.38	6771.6	29310.1	11189.7	9955.84	14406.7	7056.61	4780.52	7729.89
2	14	5	78J24	CONTIG8189	1399.12	4687.94	1344.44	271.445	307.349	508.123	162.276	739.161	336.622	424.187	387.621	505.499	261.371	540.995	314.035	1034.8	674.108	748.823	771.66	504.24	937.564	517.549	538.636	840.142	605.833	449.98	345.171	304.729	325.051	350.726	577.541	306.667	527.073	355.059	262.3	349.991	203.49	353.944	437.638	136.201	267.307	375.716	222.856	157.404
2	15	5	78N24	CONTIG8309	2966.35	10431.4	3699.24	9569.02	11234	27650.7	11877.2	26448.9	13378.8	1689.92	1095.75	1792.12	13862.1	16204	9503.69	13530.7	13379.1	13607	14612.4	6899.93	17673.6	13110.5	12676.9	22298.2	6917.91	11256	13376.4	1999.22	749.875	2086.49	35429.6	13852.5	19340	10843.2	10904	5982.9	7478.05	33647.3	14274.5	4838.84	6063.82	2404.93	11346.8	16253.3
2	16	5	79B12	CONTIG8382	970.765	2480.76	1726.12	153.214	202.922	417.526	141.631	253.655	202.072	279.034	285.878	280.569	196.422	425.58	265.043	786.017	510.089	481.647	484.415	312.773	786.086	383.462	318.235	416.054	430.778	247.287	332.634	183.398	215.501	311.958	422.915	289.833	314.301	364.386	292.601	232.023	199.282	472.232	486.412	268.562	364.548	234.014	158.09	202.786
2	17	5	79F12	CONTIG8502	1499.17	4896.24	3580.88	1361.46	1556.11	4051.17	921.564	2082.28	1299.54	6400	5326.76	5241.98	1608.5	2979.51	1690.96	5419.11	3562.17	4341.69	10958.1	4696.94	7442.52	2844.6	2074.62	3568.97	5935.28	4459.23	5850.79	3786.5	4480.86	6247.21	2602.56	2218.07	2910.56	3551.48	2490.12	1924.67	1346.45	6810.56	4691.59	4657.34	5162.96	4296.18	2863.03	2972.38
2	18	5	79J12	CONTIG8624	194.854	413.061	265.272	644.094	798.731	1810.25	501.215	1141.73	501.052	97.4058	225.425	120.881	518.666	442.179	282.007	607.379	786.017	759.745	887.945	416.641	1206.49	704.945	920.962	1214.99	317.421	400.762	361.368	132.473	42.832	107.833	604.437	289.741	209.657	567.42	437.91	522.585	231.201	837.921	507.013	138.958	174.79	63.0364	112.535	77.1256
2	19	5	79N12	CONTIG8742	219.334	25.0306	194.077	140.949	160.726	197.226	258.104	156.654	87.6095	118.941	118.89	64.2299	86.8527	113.186	81.2483	55.2807	71.1066	38.5765	13.3986	75.4633	59.3087	99.2677	71.1677	89.6792	149.408	237.49	80.9348	179.111	70.3268	103.131	103.26	181.947	68.9668	239.159	65.5528	253.114	103.401	31.7494	163.451	114.872	61.0522	126.615	287.311	303.998
2	20	5	79B24	CONTIG8395	748.623	1254.78	1205.76	699.767	729.789	1108.35	389.879	1350.94	788.758	971.575	1140.09	1120.42	502.888	783.652	632.451	1447.64	800.628	865.264	1600.74	940.631	1490.81	968.808	569.896	699.501	1505.77	979.814	670.031	694.835	911.594	827.709	930.086	718.77	973.727	1240.28	721.512	705.234	483.421	1562.03	1138.75	775.624	800.272	1386.78	579.894	368.388
2	21	5	79F24	CONTIG8518	432.145	1856.83	814.055	972.785	1214.02	3381.5	719.773	2014.22	766.406	632.163	437.111	586.621	2289.4	2506.65	1316.52	1665.82	1572.58	1479.31	2156.34	975.25	3077.87	1405.76	1618.62	2639.17	579.539	717.726	998.181	434.859	240.94	502.041	5199.19	1887.11	2195.41	1643.3	1261.88	954.271	362.168	2138.98	905.766	677.389	681.907	351.73	1409.8	1735.6
2	22	5	79J24	CONTIG8641	605.916	1949.25	664.199	421.514	450.5	1221.38	276.983	698.063	287.71	533.822	342.546	583.429	510.497	533.203	241.54	451.66	453.703	483.334	1001.38	563.077	1761.04	799.437	899.907	1592.98	373.609	449.032	542.656	186.528	201.514	235.497	3552.3	1374.08	1682.64	1174.52	907.061	671.809	213.236	1345.14	672.061	246.544	468.017	294.028	380.718	456.785
2	23	5	79N24	CONTIG8755	462.236	824.048	342.421	837.904	764.844	2622.59	958.734	2282.59	1016.99	476.559	424.054	335.605	1173.3	1003.12	518.965	1144	1431.73	1574.19	3009.79	1347.56	4572.75	1350.18	2450.71	3226.05	399.207	812.323	1175.08	394.459	292.401	333.77	6540.43	2642.27	1851.9	2018.38	1348.45	1284.32	362.517	2484.11	861.644	752.171	753.197	395.859	781.57	952.214
2	24	5	80B12	CONTIG8866	435.957	129.993	204.454	162.413	263.874	202.433	222.742	156.567	90.1687	292.337	213.558	161.12	96.4429	93.8646	53.5496	59.7115	106.556	33.0083	41.0393	128.432	87.7929	125.734	139.749	113.309	191.297	478.365	171.302	117.7	139.974	305.187	30.4035	50.4998	149.552	194.526	129.103	188.734	90.1026	64.1165	248.761	180.277	161.351	174.212	264.774	302.913
2	25	5	80F12	CONTIG8993	457.613	1682.18	543.108	682.965	422.008	1471.85	765.189	1727.5	784.761	876.385	855.844	1194.4	1026.36	1135.92	639.539	1139.59	788.702	955.37	996.971	828.98	2097.15	734.695	745.935	1514.67	493.178	642.355	598.076	207.844	267.276	371.245	2803.14	1221.93	803.348	1477.48	1108.88	858.51	238.829	812.588	380.737	375.641	508.907	307.68	362.803	305.085
2	26	5	80J12	CONTIG9113	1529.67	4597.69	1773.38	617.421	452.192	1266.1	1495.83	3377.95	1806.43	3491.85	2427.16	2985.21	1078.26	995.908	621.318	2627.59	1997.32	2788.01	5317.13	3812.11	10628.7	6782.46	7241.43	12078.9	4677.89	7115.48	11310.1	16403.3	5110.97	17338.7	34945.3	22078.8	22274.1	17783.1	14219.2	8655.72	4286.6	17384.8	6084.05	10626.4	19725.1	8154.27	829.76	736.88
2	27	5	80N12	CONTIG9246	103.126	153.251	58.3	65.4695	315.605	31.9111	222.366	70.6282	84.6767	292.242	111.819	190.591	71.2659	119.704	55.3603	77.9281	153.183	164.874	130.132	100.252	23.9371	101.528	9.8632	27.5296	196.365	202.521	190.889	109.445	127.816	128.31	107.834	74.9961	40.2865	254.992	38.7837	232.715	33.4412	72.6707	51.7937	188.79	15.3792	64.6178	547.437	1506.9
2	28	5	80B24	CONTIG8883	6632.36	16910.6	7690.95	5293.49	3300.33	11971.9	2095.7	5471.82	3233.72	2087.44	1272.44	1141.35	10718.5	10894.5	4041.01	16354.7	11850.5	15142.8	18353.9	13175.5	27713.2	7611.55	8625.92	15233.9	2964.47	3591.39	6821.94	550.394	207.632	653.832	15431.9	5728.81	4898.4	22092.1	19927.5	12856.6	4105.11	17523.9	7401.17	15462.7	18011.7	3059.16	2147.9	2696.5
2	1	6	74F12	CONTIG6027	4522.28	10195.2	4677.57	1645.15	3618.57	4237.26	2580.64	4495.67	2443.53	1472.94	1699.34	2372.18	1285.16	1948.81	1069.55	3029.84	3570.01	1983.63	4082.22	2012.33	5270.66	4913.42	4371.7	6848.71	1567.83	1284.35	1536.41	884.242	806.628	1042.04	9066.89	3290.84	5464.86	3024.74	3260.46	1794.76	594.381	2985.35	1291.73	1226.62	1541.26	1329.28	2625.03	2910.39
2	2	6	74J12	CONTIG6152	1915.14	4230.14	1930.42	1559.6	2601.85	3428.05	2090.5	3975.74	1919.49	847.386	823.073	1117.33	542.79	832.669	543.677	1074.21	809.18	637.06	1181.61	559.454	1318.76	1794.51	1575.28	2337.67	1140.82	1003.62	994.899	960.991	779.136	1016.53	7925.54	3004.2	5041.75	2947.05	2900.9	1751.54	660.62	2371.83	1572.73	702.477	1139.81	1681.23	977.755	1076.79
2	3	6	74N12	CONTIG6280	1885.16	5361.66	2313.47	622.845	1240.81	1526.96	811.926	1609.42	1178.31	1898.1	1924.8	2947.14	1338.43	1825.76	983.403	1844.08	2669.7	1590.68	2468.32	1161.12	3578.18	1997.19	1945.75	3179.82	1100.23	1062.27	1240.64	693.395	675.113	1140.19	3791.05	1636.83	1876.02	3252.68	3629	2199	459.976	1521.47	1308.87	1137.79	1074.16	774.29	593.505	586.344
2	4	6	74B24	CONTIG5921	2911.96	8012.09	3567.68	1235.9	2171.77	3538.82	1751.21	4054.4	2261.19	2869.21	3336.4	5053.69	3618.4	5150.25	2916.59	5017.47	6332.66	4387.46	4370.69	1880.3	5435.46	4135.08	3973.47	6308.62	1471.15	1345	1238.46	764.133	685.07	909.728	6742.42	2502.43	3637.71	2949.14	3172.06	1856.41	376.57	2284.78	1209.83	681.878	727.895	1012.82	840.38	904.604
2	5	6	74F24	CONTIG6046	2381.11	6389.74	2458.78	4349.37	9794	13269	11664.1	21187.5	12774	4503.05	3055.94	5666.58	9370.67	12711.8	9094.92	9139.11	14686.1	9016.31	24267.2	11741.6	29843.2	28867.5	23697.4	38640.2	10836	17608.7	21083.8	14204.3	7959.15	14929.2	38347	23115.7	36507.1	13915.8	14003	7679.51	13964.2	53859.2	24686.1	13621.6	19361.3	17131.4	14873.2	20442.1
2	6	6	74J24	CONTIG6172	153.133	82.5978	108.505	115.26	205.596	252.604	224.324	30.2703	12.627	105.154	101.701	241.805	36.2973	142.813	87.0012	82.9173	42.3536	67.6044	39.9348	196.699	41.2681	54.1483	23.7302	20.873	135.157	153.042	209.951	79.0352	187.971	167.52	82.8197	102.063	9.52072	157.654	98.7242	279.172	118.325	48.741	196.063	201.255	124.907	146.061	298.077	473.661
2	7	6	74N24	CONTIG6299	2508.85	8534.32	2735.73	6550.11	13486.1	22893.8	11834.9	23109.6	12897.2	2223.02	1501.65	2765.73	10123.6	15432.7	8880.24	7229.77	10928	7880.63	17983.4	6493.67	25141.1	21883	20939.8	32911.7	17829	31811.3	37910.9	9430.63	4870.98	9620.93	40868.4	27658.4	34281.1	4009.17	3956.32	2351.74	6562.88	34566.2	17106.5	5524.25	5797.17	4704.67	19430	22902.5
2	8	6	75B12	CONTIG6447	246.003	837.999	330.718	301.418	545.045	609.024	277.364	691.836	447.46	1180.15	1789.07	1460.16	443.592	536.534	349.908	692.257	884.072	2768.75	1039.69	400.684	1568.31	1016.56	830.492	1392.37	260.473	281.032	467.105	159.66	150.016	176.675	1337.78	487.744	685.586	1006.2	949.61	678.976	225.116	613.977	354.304	183.571	200.706	202.463	319.297	233.343
2	9	6	75F12	CONTIG6573	447.96	1393.6	566.141	896.445	1493.43	2164.9	1484.59	2792.18	1442.8	281.733	268.754	358.974	856.803	1094.83	820.237	959.656	1347.17	1473.11	933.535	468.854	1129.91	1485.29	1206.05	2221.35	657.07	707.892	873.669	809.055	454.331	850.391	9897.49	3383.57	4483.33	2417.68	2012.3	1200.2	477.65	2090.64	1103	962.005	1256.32	535.535	145.423	204.3
2	10	6	75J12	CONTIG6708	3826.69	12452	4800.23	3300.77	5962.19	10894.3	3545.35	6740.74	3814.62	2043.07	1248.79	1915.5	3987.78	6120.99	3405.79	4082.71	5480.07	3522.34	11561.1	5776.03	15056.8	10221.5	9243.34	16386.7	2933.81	5264.91	7306.3	3101.07	1520.13	3236.08	26330.8	11660	12846.9	6474.26	7063.43	4102.54	1919.98	11450.4	5134.18	7391.38	6418.17	3699.46	4740.67	5012.99
2	11	6	75N12	CONTIG6833	49718.3	79296.9	53084.5	2381.53	3438.47	5090.83	4201.8	9923.77	5698.24	4402.49	4277.18	5945.84	9141	10921.3	7365.88	11596.3	13510.4	12263.2	11051.8	6607.98	12408.9	18298.9	13273.2	21910.5	5713.76	7859.83	6485.41	7093.02	2981.66	7259.73	17126.5	10232	8702.98	7097.49	7220.14	5161.37	1738.94	6695.21	3143.63	4978.34	5751.54	5290.3	6306.48	9627.58
2	12	6	emp	emp	105.103	44.4413	32.886	131.244	273.039	58.8873	345.633	105.648	100.497	556.02	100.051	26.1349	39.0938	96.1989	81.5088	70.922	81.5946	85.8456	49.6375	37.3749	50.3155	12.3198	142.377	24.8811	137.856	193.837	189.709	80.9502	148.558	147.358	109.092	24.5481	8.59686	138.268	65.1523	281.176	96.0173	286.244	229.647	155.242	251.904	149.183	423.177	462.778
2	13	6	75B24	CONTIG6463	15435.1	33071.7	17801.5	4279.9	6761.24	10494.4	3586.91	7276.68	4100.63	4523.08	4493.33	4538.57	44733.4	54406	58088.1	80359.5	72033.5	58481.6	36014	24877.1	36783.9	26991.5	18890	31400.4	8868	10625.4	9554.8	6302.4	3065.61	7389.26	20947.2	5981.23	8773.59	6367.89	7166.7	4315.33	2037.64	7493.62	4233.31	3453.35	4073.5	3149.43	3016.97	3625.27
2	14	6	75F24	CONTIG6588	1140.54	4406.92	1505.47	1273.63	1901.77	4572.78	1718.53	5082.37	2279.77	941.292	849.938	1071.49	1357.42	1705.13	968.657	1677.84	1875.56	1826.41	9681.03	3934.49	12056.1	6607.42	6708.99	13374.7	8629.15	13510.1	17990.4	5102.08	1801.9	5516.38	17347.3	6667.36	9319.63	1947.82	1883.11	1228.57	1006.17	7042.5	3522.31	1895.31	2602.53	1152.75	2691.63	3184.94
2	15	6	75J24	CONTIG6721	897.439	2239.61	1599.92	841.876	1123.45	1989.95	495.718	1297.01	914.148	4081.02	4221.15	5926.93	696.046	1524.68	799.894	2329.97	1896.82	1672.39	2801.05	1315.15	2160.62	1444.2	956.344	1365.01	2639.01	1832.34	1285.86	1005.34	1382.19	1388.94	1688.7	1123.87	1788.29	1283.24	1059.57	757.572	598.223	1797.51	1768.92	884.096	1246.04	1421.81	753.622	709.449
2	16	6	75N24	CONTIG6849	3833.24	14395.4	5464.59	1464.24	1561.74	3136.34	1281.01	3526.42	2005.94	6851.5	5983.48	7984.54	3155.98	4147.87	2386.61	4125.9	3483.36	3436.2	4068.95	2137.88	3792.48	3515.01	3166.46	4837.56	3208.08	4193.83	3477.58	1356.24	1064.48	1524.32	4093.17	2122.36	2633.84	1008.9	783.077	687.079	512.144	2649.97	1626.96	847.441	1124.57	1838.66	2502.93	3035.38
2	17	6	76B12	CONTIG6964	314.396	310.4	194.944	281.77	475.868	287.16	299.255	85.8483	191.856	1991.61	1385.08	1840.5	212.807	144.409	119.631	420.048	198.966	296.48	346.042	415.156	639.598	427.755	240.454	162.395	429.302	440.451	347.577	234.03	294.872	421.763	180.911	314.59	207.064	302.276	262.533	285.875	111.77	387.168	505.129	585.856	597.315	256.49	316.31	161.92
2	18	6	76F12	CONTIG7085	164.151	386.03	201.194	83.4007	130.005	127.37	103.333	74.2607	66.8123	274.291	177.199	220.251	74.6672	64.8719	114.185	210.289	138.208	92.6864	85.7181	90.1891	166.211	119.847	108.171	144.869	204.247	189.985	101.801	101.819	136.816	104.632	130.486	53.9744	65.9739	76.411	117.489	90.4123	116.657	75.7176	192.842	64.8831	75.9646	107.228	75.9624	98.7519
2	19	6	76J12	CONTIG7209	1973.02	6420.57	2743.32	12094.4	13929.4	31840.6	5186.88	11153.1	5703.41	2306.99	1776.57	2357.2	32878.8	46116.6	42527.7	59141.3	53831.9	45292.6	16901.8	9531.74	24189.3	11945.4	10832.3	21567.4	3475.96	3896.54	5096.9	997.115	1047.81	1729.01	9293.22	4306.33	4378.94	7913.62	6559.72	4224.64	8223.26	38301.9	16536.8	8520.48	12872.7	7595.86	1546.59	1806.41
2	20	6	76N12	CONTIG7333	441.729	1330.13	628	313.919	311.654	1057.04	459.314	975.846	517.825	156.959	136.229	171.412	943.1	1136.25	736.403	928.209	812.286	835.015	637.912	356.767	1151.52	700.97	756.486	1159	483.494	752.229	890.627	122.818	129.99	145.968	1769.78	688.997	468.009	312.986	174.452	176.34	200.332	1190.57	572.192	430.16	122.081	125.051	213.309	207.278
2	21	6	76B24	CONTIG6979	2175.65	8315.99	2642.7	16232.5	17909.1	41750	8576.48	21182.3	9228.8	4007	2558.05	4897.28	34221.7	38551.6	32259.1	50042.4	43262.7	43685.3	38959.5	25073.8	38219.3	30756.6	28999.8	42084.6	29917.6	47320.9	55803.5	8661.93	3415.97	9471.72	37856.8	23695.4	34865.9	4944.37	4215.62	2242.54	17544.1	58557.1	28735.2	5942.31	10881.3	10262.3	14176.4	21036.5
2	22	6	76F24	CONTIG7100	352.175	1236.99	549.394	329.803	551.461	738.249	444.27	1076.99	519.068	609.828	540.777	565.862	727.938	793.009	626.983	650.872	503.78	629.486	675.929	510.811	719.649	486.735	402.395	655.11	405.609	292.665	511.706	226.485	203.626	314.844	2872.55	1010.27	1325.1	939.941	752.225	516.176	328.319	1015.46	706.036	497.879	476.556	416.561	162.307	152.809
2	23	6	76J24	CONTIG7225	1448.68	4177.67	1841.04	6555.52	6600.9	15661.1	5411.51	11856.2	6315.97	2316.78	2518.42	2936.9	6271.04	7009.6	4337.2	8616.49	6910.1	8035.17	14562.3	9339.78	20369.1	11771.4	10833.4	18811.9	7925.05	12865.9	20586.5	2795.43	1088.45	3001.89	34376.6	21587.3	23043.7	8675.55	7177.99	4899.75	12577.6	47133.8	19313.2	5781.85	9531.43	3985.93	6570.52	7389.9
2	24	6	76N24	CONTIG7345	3228.33	10346.7	3741.87	20623.4	19903	54972.7	26133	43009.4	27881.1	8869.36	6953.83	9130.37	31510.4	35387.5	20141.5	35093.1	26985.9	39544.9	34953.7	24040.7	36125.6	30979.2	30757.6	39540.5	24636.8	42238	57418.2	16108.3	5639.78	16042.4	38393.6	35469.7	53045	14686.7	11239.2	6547.25	33610.9	75816	42278.8	9703.07	17289.7	14895.8	28768.1	36487.3
2	25	6	96B12	SPOTTINGBUFFER_B_12	174.78	106.909	98.6044	157.469	239.265	112.189	105.417	35.1168	47.9553	126.928	260.265	45.4352	84.1189	37.6668	97.5775	76.7073	52.3798	88.7383	82.5205	180.097	42.8887	86.8746	61.1514	63.9087	152.333	92.1259	137.319	179.097	171.967	99.9593	143.691	128.372	64.3674	82.5563	9.18466	172.343	73.2116	256.508	61.0627	137.928	33.0574	211.919	255.789	246.397
2	26	6	77B12	CONTIG7451	983.29	3548.03	1116.29	4484.7	3647.04	11343.1	1626.37	4651.13	2240.77	1113.34	856.462	976.882	1219.72	1304.31	746.756	3849.67	2872.82	3975.11	2449.36	1781.16	4897.88	2764.73	2995.91	5695.97	1948.11	2872.19	4748.72	725.991	256.685	793.349	17102	6982.6	7024.66	10820.5	8359.56	5189.61	4043.15	17438.8	6487.18	6133.2	10147.6	2471.97	1305.86	1396.89
2	27	6	77F12	CONTIG7571	886.812	2483.97	1107.58	4405.43	3319.21	9147.94	2759.51	5664.29	2842.53	992.593	741.062	887.221	1846.26	2007.46	993.637	2826.53	2042.18	2581.53	3747.64	3348.63	7691.49	3645.49	3504.59	6709.22	1402.54	1993.99	3019.49	1701.05	741.69	2026.44	16164.9	5650.32	5763.43	3919.08	2826.85	1810.42	1230.39	5366.73	1808.96	1535.58	3477.52	1577.88	1198.74	1529.53
2	28	6	77J12	CONTIG7690	26516.9	37221.6	23520.3	66838.3	66144.5	87133.8	55389.4	51250.4	44837.4	24163.3	25593.1	30270.6	43065.2	53472.4	39806.6	84269.6	62636.7	67258.2	64259.4	51805.8	58305.7	49669.3	43746.7	55572.9	72712.7	62082.1	67947.5	35203.3	12874.9	35017.8	58090.8	45790.4	53276.7	76922.9	72185.5	43204.7	54719.5	72144.1	66205.7	42242.3	59177.6	35870	40697.4	55534.3
2	1	7	70N24	CONTIG4335	1431.83	3616.72	1504.72	372.085	670.156	926.874	677.775	1399.12	832.136	1331.3	1815.77	1993.02	759.536	1128.21	731.035	1535.22	1868.29	1155.6	1526.07	492.146	1332.7	1568.26	1315.58	2284.24	863.884	682.316	1170.76	466.983	537.017	485.086	7980.8	3179.59	5324.7	1916.15	2030.67	1239.59	436.926	1495.04	1467.35	681.805	756.428	803.482	428.225	333.936
2	2	7	71B12	CONTIG4458	187.94	27.0878	154.983	148.448	168.713	52.7977	201.473	19.8527	64.6868	21.8192	256.115	308.932	86.965	62.714	72.3453	46.2175	66.0832	74.9095	83.1814	114.832	95.6719	115.071	14.208	53.4968	98.2536	297.56	165.155	115.084	192.643	272.222	3.92529	88.4203	156.58	47.6365	64.3624	237.508	50.0892	39.5215	245.336	147.332	75.5464	135.284	201.251	468.643
2	3	7	71F12	CONTIG4584	1165.42	3463.11	1109.02	3222.6	7221.94	10329	7710.15	17864.4	9686.6	1328.45	1855.83	2608.57	7813.14	11407.2	6502.22	5424.44	8732.48	4874.43	9318.52	4170.57	11814.2	11761.8	10760.9	16447	2554.09	3513.96	5642.9	313.513	159.098	401.777	23501.7	9437.57	15126.5	3877.62	4091.13	2220.45	5624.42	28213.9	12569	2993.93	3711.24	2870.13	5619.8	6632.77
2	4	7	71J12	CONTIG4714	7007.89	18953.8	7267.45	31708.6	44255.9	72322.7	33028.6	47164.4	38916.9	17101.4	13347.1	23973.1	30156.6	39357.2	35808.2	41016.6	56759.5	41485.8	62958.3	37686.1	49022.3	45532.6	45726.6	53513.3	54883.9	55160.4	73824.6	43763	28132	36180	41972.7	37238.8	65345.4	43135.2	46789.8	25507.6	39635.9	72466.7	49403	23643.2	33667.2	36825.6	38507.1	46836
2	5	7	71N12	CONTIG4842	172.709	35.3851	11.3648	82.0475	33.2594	131.15	168.522	42.5781	5.05619	225.466	47.8097	242.86	87.6211	134.117	71.87	69.6374	70.2178	105.208	25.3223	49.3897	81.761	106.698	51.171	29.5152	58.3678	107.494	147.482	113.196	263.038	125.688	12.1705	35.4957	26.161	61.7681	12.3694	194.2	126.913	39.6589	51.3803	1554.07	113.111	154.086	119.577	362.453
2	6	7	71B24	CONTIG4473	51993.2	74905.9	54510.8	23441.5	33350.8	48865	56139.8	73491.2	59028.8	12666	10435.6	18138.2	7539.36	8826.27	5247.66	8367.12	12349.8	10199.5	7434.34	3921.71	8242.06	13257.1	10184.8	18203.7	2615.5	2610.7	2211.65	943.122	713.02	1315.11	2633.27	1816.2	1593.31	686.457	747.059	546.365	817.432	4830.43	1366.88	1477.74	1732.49	1326.35	640.866	1403.78
2	7	7	71F24	CONTIG4596	188.571	336.003	333.137	193.682	336.398	288.372	296.484	262.34	177.279	651.368	269.746	210.252	234.132	238.755	113.438	661.991	465.737	313.299	810.913	398.646	464.535	130.125	326.267	209.465	643.764	595.064	308.666	178.402	503.776	311.383	328.281	303.012	263.27	254.663	284.981	418.898	285.259	551.133	534.826	607.465	250.456	440.87	234.111	268.238
2	8	7	71J24	CONTIG4734	987.847	2205.08	1910.8	794.045	960.951	1102.69	650.267	2131.18	1071.97	2298.55	1870.88	2455.45	973.321	1919.6	1195.69	3525.59	2796.91	2064.11	3194.6	1579.45	3263.71	2717.82	2286.14	3814.84	3082.18	1847.35	1384.76	1840.01	1706.75	2207.54	3180.84	1677.39	2357.33	2616.84	2295.19	1706.63	848.086	2890.69	1787.4	1345.33	1608.57	2278.96	793.792	774.085
2	9	7	71N24	CONTIG4854	2306.01	5832.55	2443.01	8641.32	15272.1	25762.8	11851.1	20226.9	11902.5	2112.9	1500.55	2145.27	11579.8	18876.5	10777.8	12748.8	15363.1	10586.3	23443.8	13034.7	30388.9	20628.4	17514.2	29215.8	9514.34	16205.4	22010.1	6638.74	3237.27	6562.7	34168.9	15967.4	17523	5802.99	5994.82	3931.74	4066.42	22766.4	11433.9	5463.98	4622.82	3119.29	13895.2	14577.9
2	10	7	72B12	CONTIG4959	4289.99	11905.4	7239.84	3300.16	4019.44	7537.33	1049.12	3954.84	2033.18	15846.6	13381.3	16299.3	1394.94	2583.86	1945.38	5164.5	2752.08	2808	5716.42	2939.22	4838.3	2485.57	2110.92	3239.55	4204.88	3200.88	1727.53	1273.58	2297.42	2129.99	2590.12	1998.29	2391.04	1839.59	1541.95	1267.98	676.653	2573.93	2114.08	1319.45	1357.77	3040.7	719.226	743.736
2	11	7	72F12	CONTIG5073	1736.73	4123	3911.93	1742.3	1674.32	2872.94	1270.13	4194.45	2744.83	3972.56	3412.01	3998.81	1595.98	3195.9	1856.87	5496.28	3101.73	3305.61	8475.52	4016.85	6749.12	2520.56	2373	3166.6	6612.24	4289.14	4167.22	2543.86	3407.6	3976.13	2661.04	3023.21	3230.39	3075.62	2003.97	1962.92	1252.75	5300.19	4097.61	3158.44	3184.79	5431.58	2048.34	1911.76
2	12	7	72J12	CONTIG5192	142.472	76.7195	83.3164	149.666	262.396	92.3065	204.96	125.688	112.676	351.223	209.354	190.825	146.917	88.8421	56.9665	27.0131	95.011	27.2653	97.1043	50.4673	70.0935	18.5875	92.9017	112.341	141.074	87.1123	159.689	135.936	383.032	190.044	96.2253	94.2567	42.8646	268.006	5973.95	165.468	34.4268	336.409	149.25	168.138	152.357	69.4608	388.547	176.664
2	13	7	72N12	CONTIG5317	631.55	2047.53	860.698	350.928	309.167	733.273	212.226	694.957	421.383	1976.82	1938.7	2526.89	407.287	676.46	569.808	1196.23	818.648	722.943	1230.44	598.281	1263.82	707.873	549.517	887.897	1171.14	843.274	611.258	354.83	640.689	720.647	1227.98	694.432	921.618	839.595	375.851	486.344	271.376	1033.63	796.759	741.429	597.282	750.749	323.697	375.117
2	14	7	72B24	CONTIG4973	558.157	1741.96	1192.22	850.118	1196.75	1842.66	376.019	574.297	468.732	832.215	746.384	887.642	4133.49	5894.85	3760.47	2694.41	2583.44	1967.81	2159.68	1635.18	2159.6	1947.85	1225.38	2257.39	1354.28	1076.56	1032.5	558.275	1122.07	1036.4	1672.04	977.365	1134.3	2388.34	2187.94	1394.74	643.603	2634.07	2088.78	1858.76	2069.58	1008.99	708.535	659.831
2	15	7	72F24	CONTIG5087	667.832	2046.7	971.189	574.541	673.889	1077.83	317.063	1050.41	606.801	2124.26	2311.75	2859.25	428.476	748.236	484.214	2055.09	804.839	1050.14	1603.06	836.946	1302.3	720.331	591.165	927.482	1933.73	1291.81	738.647	568.591	998.007	879.556	718.871	770.559	931.525	993.336	609.561	739.088	367.714	1326.75	1130.73	695.295	798.698	1145.47	398.502	361.131
2	16	7	95B24	mCD038448	117.639	466.813	605.515	151.655	301.793	575.29	246.089	205.605	199.086	897.724	744.089	638.261	510.999	612.76	469.848	947.11	790.198	744.18	1088.47	625.369	972.648	388.067	294.244	542.238	547.006	643.352	691.276	743.521	615.301	834.453	518.798	283.968	476.56	410.281	49.9469	310.529	277.962	613.888	668.225	774.019	596.584	445.32	235.496	383.955
2	17	7	72J24	CONTIG5207	307.994	1008.67	491.631	228.325	238.074	416.506	222.218	295.762	197.506	1163.15	1054.71	1443.25	203.854	400.162	308.272	832.668	354.507	348.903	560.8	388.819	521.902	254.843	147.944	328.012	488.663	526.069	644.64	287.444	295.524	355.344	342.083	247.178	254.686	377.488	310.098	281.844	250.775	390.83	393.835	267.086	332.267	361.64	157.161	119.055
2	18	7	emp	emp	226.728	104.452	143.084	199.467	176.896	266.117	277.053	129.019	141.023	146.228	134.371	65.3371	97.5355	93.1677	36.2771	60.7377	141.41	10.0836	26.2927	105.174	95.1091	123.295	96.9453	46.4772	157.924	110.524	203.629	330.587	256.341	90.8463	60.2556	102.861	48.4619	159.907	90.9758	165.955	57.3017	176.979	150.165	111.865	172.089	342.136	300.422	344.686
2	19	7	72N24	CONTIG5333	332.944	1494.72	523.285	778.676	768.142	2010.92	1280.68	2951.55	1617.86	814.085	671.421	808.832	2754.77	3568.16	1938.75	2643.26	2153.07	2039.25	3596.31	1914.19	5593.22	3604.38	3148.71	6729.99	949.667	978.445	1735.54	215.901	230.034	414.307	3956.71	1725.41	1493.96	2664.55	2304.14	1601.25	733.841	4122.08	1533.49	1237.42	1860.43	667.904	367.14	168.384
2	20	7	73B12	CONTIG5407	1180.28	3683.93	1534.45	3601	3432.54	10341.7	3189.91	8591.99	4018.94	1211.89	878.206	1189.05	10388.9	12182	5898.7	9391.61	8320.07	9500.12	7844.47	4555.82	13513.3	8129.87	8089.75	17314.7	4519.76	7613.21	9615.93	1979.55	857.318	2064.32	29846.5	12216.5	16165.3	3920.75	3375.06	2104.14	5797.68	29794.3	12841.7	2998.89	5482.28	3138.82	8853.27	11269
2	21	7	73F12	CONTIG5523	400.929	815.069	590.902	220.908	553.298	805.05	217.165	270.623	266.673	2595.76	1551.99	2201.86	288.026	403.605	289.064	767.129	590.523	753.754	1310.13	616.148	1370	455.52	322.275	615.188	766.583	704.42	836.45	537.689	588.05	934.945	627.299	431.316	565.55	712.171	631.979	503.933	136.851	806.509	771.21	1003.43	993.447	666.122	313.504	353.311
2	22	7	73J12	CONTIG5647	2764.98	9122.62	3646.07	7171.43	7569.17	22168.4	6526.31	16949.7	8256.51	7632.97	5642.18	8489.62	5996.04	6737.58	3684.81	11638.2	9254.38	11495	29347.9	15938.6	42319.8	13876	14505.5	26205.6	7766.42	12360.4	17821.3	12923.1	5082.65	14769.7	36779.7	15586.4	20629.8	18731.8	15814	10076.5	3438.56	15205	6716.63	10660.3	13957.7	4298.57	7582.98	8735.99
2	23	7	73N12	CONTIG5771	91.3316	40.8576	155.83	121.44	256.795	50.7556	254.784	6.89612	121.176	217.684	308.227	55.1612	172.117	22.4851	52.6113	83.3829	113.472	19.9977	74.0047	83.0275	42.465	20.243	204.45	73.9167	155.421	227.471	121.599	197.749	69.5997	49.6209	158.3	96.2508	101.968	102.269	72.2859	261.801	252.506	184.352	104.592	139.037	127.17	43.7948	294.042	77.4258
2	24	7	73B24	CONTIG5426	1007.56	3165.6	1098.53	260.627	235.073	411.187	175.076	410.962	244.601	529.336	427.225	409.463	475.555	534.039	321.261	1070.67	721.386	1027.69	678.942	469.369	1352.03	620.744	616.773	1212.82	313.173	261.133	583.112	333.419	239.279	401.884	2398.46	832.754	1041.2	565.606	397.011	359.296	190.421	862.362	478.212	181.085	260.971	161.127	181.5	216.262
2	25	7	73F24	CONTIG5539	3222.3	7193.61	2982.37	5106.22	4138.31	10029.6	2287.95	4633.97	2689.46	1549.03	1370.02	1829.85	4080.65	3276.89	2539.04	2869.9	2058.15	2448.8	2917.82	2262.26	5077.81	4036.17	3293.36	7533.5	2203.35	3088.81	3521.16	2753.03	1222.42	2998.06	22153.8	9590.22	9116.17	25967.1	19900.3	11250.3	4584.57	16672.5	5456.05	2762.01	6442.23	3542.2	2890.41	3516.91
2	26	7	73J24	CONTIG5663	12650.2	30863.8	11897.8	22853.1	18868.1	50036.1	13744.1	26235.1	14383.4	4961.4	4320.53	5209.64	24301.2	25691.6	12999	5933.89	4692.31	6172.44	6719.56	4594.69	10830.9	6648.69	5648.58	12051.2	9981.15	15615.9	25089.2	53981.8	24308.4	42715.1	68051.7	45809.6	70534.3	11971.4	8330.24	5211.54	12509.4	47334.6	18584.8	3935.32	8826.06	4267.28	38014.3	45673.3
2	27	7	73N24	CONTIG5783	766.294	2016.66	897.206	133.69	168.098	361.251	113.038	203.483	278.46	446.651	327.215	359.241	215.143	124.68	164.645	619.108	247.697	482.363	501.767	336.513	855.463	194.738	261.434	464.421	361.54	181.69	181.679	226.377	146.192	206.66	824.628	343.516	202.427	508.154	389.907	368.818	146.789	154.467	341.185	137.715	165.639	177.489	134.788	183.347
2	28	7	74B12	CONTIG5905	406.866	1261.78	588.576	310.326	268.077	635.032	214.027	697.719	477.323	1557.92	1119	1072.81	9134.64	10600.4	4763.1	6317.02	4417.32	5853.72	3773.66	2706.81	5851.29	2480.06	2475.43	4549.36	1333.92	1314.35	2524.51	1014.72	455.123	1149.58	13653	5301.96	4465.1	11375.6	9010.4	5940.51	1011.31	4645.49	1793.29	2886.78	4580.5	1343.61	589.117	681.769
2	1	8	67B24	CONTIG2397	1344.06	2955.57	1571.07	2506.72	6646.73	8115.89	7203.48	12335.4	7378.83	3109.7	2467.13	3959.99	3053.2	4534.24	2829.96	3371.11	4997.05	2528.27	8658.87	3813.83	10870.4	8754.58	7717.87	10860.4	4433.99	6021.69	8488.29	4732.84	2990.75	4770.5	18311.1	7834.29	12567.2	1538.09	1390.34	1131.61	2641.53	11360.5	4861.05	1859.58	2395.4	2732.3	6050.09	7605.38
2	2	8	67F24	CONTIG2535	3135.22	7739.11	3126.18	7100.16	13601	19348.6	18891.3	33155.3	19312.3	6265.29	4961.89	8557.93	14665.8	20876.2	13316.3	9928.51	15218.8	9732.15	35349.7	16805.1	38330	21808.1	17618.3	29924.4	10413.5	13700	18789.5	11489.3	7118.65	12480.6	42278.1	25468.9	41182.4	9352.56	10136.3	5799.22	9089.4	40556	20433.5	8134.77	11398.9	11391.5	10364.8	13388.6
2	3	8	67J24	CONTIG2694	4387.62	9565.9	4020.63	8793.34	17206.9	23654.8	14402.6	25275.4	14544.3	2325.67	1843.98	3023.67	20884.3	30872.8	19258.8	14023.4	20792.6	11666.6	25560.9	14201.3	29821.8	31746.2	27558.4	38856.6	14238.1	22925.2	28997.8	6472.99	3887.23	7024.45	41938.2	25560.4	38197.1	17940.3	21182.5	11588	15980	61136.9	26680.3	12538.1	15583.8	15209.6	14304.7	17691.3
2	4	8	67N24	CONTIG2842	3462.9	9895.07	4051.62	6259.2	11958.6	18546.4	9311.87	17513.2	10319.7	2927.18	2457.04	3774.95	27480.1	38527.6	22967.7	21002.7	26914.9	18323	48480	22927.6	41678.2	29388.7	25643.8	38617.7	16472.8	21278.6	26678.1	6512.46	3715.97	6948.82	41222.6	23054.4	35141.1	30571.7	41052.8	23806.3	12692.1	49965.2	26340.8	17852.1	20083.3	14702	16005.3	20209.6
2	5	8	68B12	CONTIG2961	1977.13	4635.19	1969.71	5153.37	10443.4	13891.9	7884.53	13241.2	6938.97	3213.29	2389.84	4254.2	7641.5	11812.4	7643.03	7376.12	10793.8	5955.22	14065.4	7114.46	17520.5	17398.8	13296.8	22163.1	7312.15	12896.7	15606.9	7094.78	3939.29	7214.29	36296.5	15557	23307	4681.61	5039.4	2973.73	5375.99	24705.5	9898.66	6251.3	8430.53	7782.11	6429.45	7955.87
2	6	8	68F12	CONTIG3102	2889.93	7423.83	2956.59	10735.2	19068.7	31349.9	19552	31338.4	17549.7	7554.16	5864.05	10040.7	26897.3	37836.2	23471	63249.8	63045.1	47991.4	37802.6	18445.6	43720.8	19641.1	17047.7	29110.7	11306.6	15645.5	19017.7	3204.38	1922.47	3420.67	34650.6	13069.2	22675.6	7050.32	6968.22	4200.82	13279.9	52578.1	26598.7	9145.56	12312.5	10938.1	7003.33	8776.52
2	7	8	68J12	CONTIG3259	1001.14	2293.51	909.708	461.212	968.597	1331.14	378.328	628.565	390.647	725.157	570.421	804.791	864.26	1251.82	935.829	867.039	1119.45	583.585	1897.28	893.789	2318.88	3534.46	2887.29	4500.07	1718.08	2891.3	3482.52	3817.81	1929.44	3928.62	14761.5	5420.98	9314.27	9913.69	10154.4	5731.46	5622.34	21754.8	9061.22	10115.7	11443.6	7865.53	740.044	1096.75
2	8	8	94N24	mCD037200	2090	5466.08	5387.28	1595.86	2188.87	5270.71	1608.43	3310.1	2961.11	5291.95	4471.79	4867.83	2506.89	4700.85	2607.61	6400.69	4890.27	3928.56	11888.9	4564.53	9974.22	2978.98	2950.21	4913.83	7093.29	5352.19	7696.97	4819.49	4929.1	6936.08	5245.47	4790.56	4765.12	3109.51	2040.67	1991.85	1549.2	10419.5	6253.99	5859.33	5074.19	6436.39	3668.72	3838.93
2	9	8	68N12	CONTIG3390	164.968	98.0171	158.665	40.0569	172.777	74.0245	106.176	96.9663	17.7741	115.79	240.308	102.521	28.4769	30.1047	105.39	93.7225	35.6677	18.8311	61.7522	102.057	95.5343	378.442	89.6199	29.7998	192.441	178.881	80.1248	153.202	76.5834	206.579	73.9444	142.385	65.0915	109.992	23.2269	293.829	100.909	166.646	142.677	158.494	26.0868	25.2574	95.6519	52.1915
2	10	8	68B24	CONTIG2980	3807.15	9748.89	3933.22	17474.8	28057.2	47775.9	29562.2	46289.5	31856.6	15465.2	10961.4	15627.3	19485.9	27141.4	17478.4	26363	33352.4	24679.5	63946.6	42601.2	60843.7	46386.9	43341.9	59712.1	49240.3	59801.3	69385.9	38566.1	20653.8	36755.7	48177	37199.1	53854	38490.8	40728.9	23000.6	26530.7	69566.7	47650.3	40130	47347.1	23735.7	54285	53367.4
2	11	8	68F24	CONTIG3121	4372.67	11998.8	4399.93	8794.74	13832	25274.4	15292.2	27873.2	16485	13050.5	9333.66	14269.1	4841.1	7251.88	4448.8	1355.4	1457.35	1034.59	6549.62	3111.06	7771.57	4947.52	4493.74	8384.91	5117.02	8360.99	11025.8	29299.6	16774.2	31944.6	41255.9	28140.7	41297.7	12425.2	12258.7	7485.83	14660	58381.5	27608	11345.8	14037.9	8734.7	43149.3	42862.6
2	12	8	68J24	CONTIG3280	138.658	46.4108	83.9475	183.078	283.588	124.813	258.346	404.284	141.35	173.15	206.057	64.9314	168.305	27.9383	180.496	32.2681	106.394	106.516	27.1783	67.5734	51.6831	55.7161	83.5419	77.8472	118.914	157.13	128.638	56.3811	154.792	194.557	166.628	65.3767	109.952	99.1025	41.1834	273.403	95.5454	262.428	83.3187	461.563	94.9143	96.674	367.227	418.18
2	13	8	68N24	CONTIG3403	855.534	4659.06	1372.89	119.82	137.806	212.91	147.77	304.25	229.958	572.163	423.379	453.241	145.982	242.773	200.662	226.278	278.059	279.312	774.249	225.198	843.7	224.009	256.257	441.766	250.39	177.227	159.28	123.243	133.5	150.381	170.72	156.375	213.364	206.239	108.43	144.03	113.835	163.305	243.143	210.605	180.335	97.4795	174.657	150.131
2	14	8	69B12	CONTIG3468	4321.85	13646.9	5781.58	2202.87	2590.42	4999.75	1642.26	3477.07	2184.97	2058.34	2174.14	2552.59	1580.9	2921.34	1424.8	3993.94	3029.59	2671.68	5932.01	2838.11	6820.95	2617.76	2488.59	4384.46	2546.53	2120.58	2284.01	1053.67	1275.82	1542.02	10625.1	5238.23	6492.97	8592.38	7842.65	5988.15	1408.42	6301.12	3494.1	4596.01	4223.42	3262.78	1129.77	1038.43
2	15	8	69F12	CONTIG3579	772.551	1302.53	1339.32	617.914	594.956	793.849	217.938	1097.13	412.364	3448.82	3468.24	4331.66	485.197	983.317	619.728	1892.5	1053.26	1145.76	1616.35	1000.29	1254.16	586.962	575.79	519.676	2303.32	1595.64	858.128	766.45	1337.28	1000.47	608.305	742.041	814.405	1199.31	765.074	857.361	386.09	1147.33	1112.11	882.344	872.354	1165.28	373.373	308.157
2	16	8	69J12	CONTIG3698	1963.14	8418.68	3230.9	550.283	499.002	1085.94	316.405	1335.05	913.647	1644.93	1651.77	1957.38	535.604	1020.9	596.14	1443.86	1155.42	1168.87	1277.04	569.935	1296.27	789.899	708.125	1134.64	1244.62	930.119	694.88	360.055	456.571	605.187	1309.24	898.446	1091.47	523.694	605.623	480.179	363.865	1106.08	861.9	537.43	634.45	1363.44	375.763	395.382
2	17	8	69N12	CONTIG3802	1592.63	5430.03	3099.25	2635.68	2473.84	6488.51	1414.07	4167.03	2286.53	2022.33	1901.08	1848.97	5786.76	9227.8	4442.61	5564.08	3738.7	3612.54	13364.3	5894.71	16710.5	10334.1	9953.98	19710.5	4561.55	3645.3	4382.09	1835.96	1546.63	2443.4	8489.77	4508.85	5278.76	5919.67	5240.15	4260.28	1846.43	9581.12	5020.09	4474.08	4958.17	4103.31	2442.56	2459.91
2	18	8	69B24	CONTIG3484	271.426	357.558	320.537	301.174	451.541	859.821	422.592	385.345	379.373	544.288	464.731	337.369	320.809	626.467	367.413	684.818	540.37	517.712	1017.92	532.191	709.932	540.787	467	414.008	517.858	551.464	690.877	412.796	420.341	281.747	656.221	561.654	617.804	347.838	198.414	299.533	103.297	1044.9	816.553	547.056	354.354	558.419	361.104	247.26
2	19	8	69F24	CONTIG3595	48935.2	74952	58348.4	3859.12	3308.17	8695.18	4723.9	12194.3	7297.56	6550.18	6676.4	8419.85	10201.6	19882.4	9642.49	19943.2	16560.4	21205.8	17468.6	11626.2	15938.4	19934.2	14846.7	26225.9	5153.6	6050.67	6753.07	3412.56	2387.16	4266.92	17333.6	9765.19	12924.6	5731.93	6670.46	4669.42	1704.75	7475.07	4471.26	4881.26	4506.75	2829.14	3317.22	4933.98
2	20	8	69J24	CONTIG3710	795.067	3119.14	1705.24	588.727	675.828	1783.86	346.55	1001.44	664.162	2807.99	2062.72	1785.89	548.443	1047.97	733.786	1949.52	1021.39	1308.04	3016.59	1646.72	2855.86	1211.56	950.588	1384.31	1975.53	1181.1	1748.56	1048.15	1199.77	1793.37	1156.18	1002.57	1358.15	1237.95	838.914	810.587	529.254	2253.42	1999.41	1679.6	1647.68	1665.31	826.521	685.601
2	21	8	69N24	CONTIG3819	348.975	1180.53	546.913	141.845	184.549	250.269	126.147	342.496	195.916	732.33	531.2	603.913	208.569	287.708	253.71	630.535	360.016	520.013	474.881	369.356	606.076	312.568	251.412	417.909	640.787	526.311	454.803	197.129	286.789	268.484	236.557	342.824	330.244	848.466	548.412	450.188	436.108	1574.55	988.924	326.104	328.997	195.7	817.468	1026.61
2	22	8	70B12	CONTIG3951	103.311	20.9572	134.539	159.512	281.077	206.742	275.782	187.233	121.162	541.797	332.227	386.261	27.5615	69.4724	168.166	182.544	138.396	103.099	182.003	142.343	132.347	117.622	145.378	137.163	289.355	282.726	295.706	95.4473	200.962	128.228	179.653	158.748	36.687	340.209	95.5115	272.684	117.892	170.875	189.017	67.6271	118.206	68.2815	83.3409	285.897
2	23	8	70F12	CONTIG4068	465.918	833.84	869.669	570.518	659.914	831.304	300.948	742.094	445.115	1876.17	1409.22	1663.08	403.919	572.714	489.94	1042.71	674.477	689.886	1339.57	1066.47	1249.41	644.582	519.956	685.989	1149.79	870.734	774.474	835.936	908.857	1081.4	744.404	658.975	1600.7	1093.53	631.153	758.629	401.19	1265.52	1145.57	1033.86	1003.27	1126.98	254.703	369.977
2	24	8	70J12	CONTIG4184	245.988	786.456	400.386	421.558	552.289	1905.67	459.493	1803.3	824.614	492.255	464.086	404.838	111.783	53.8965	39.79	209.881	145.434	107.341	3639.89	1211.3	4181.88	2103.79	3024.07	4170.37	299.769	192.856	287.918	180.123	243.331	189.69	128.949	91.3362	2789.31	2602.97	2022.85	1325.38	692.907	3907.79	1343.54	852.434	817.828	338.684	375.956	582.632
2	25	8	70N12	CONTIG4321	1705.3	4773.58	2568.05	1894.61	1442.03	3097.53	819.567	3502.68	1835.34	3101.95	2931.17	2844.4	1315.33	2255.64	1263.59	4136.35	2105.58	3214.21	4643.98	2331.85	5411.22	2519.82	2204.53	4159.54	4012.65	2325.54	2185.81	1311.22	1857.22	1802.57	3739.27	2663.69	2823.47	2439.15	1499.86	1484.31	1016.72	3887.49	2611.05	1554.91	1778.53	3608.68	1160.11	1180
2	26	8	70B24	CONTIG3964	196.2	239.381	237.718	269.685	307.048	161.215	259.752	166.386	116.47	989.405	549.038	655.905	88.9722	107.665	130.348	265.818	176.462	138.545	370.225	195.836	365.853	171.302	156.733	121.367	365.437	285.281	248.252	131.687	256.135	127.52	83.0944	216.895	190.606	322.777	40.258	237.089	113.576	197.993	305.861	89.6322	185.806	136.508	57.1047	151.813
2	27	8	70F24	CONTIG4082	288.287	803.38	266.937	384.363	440.011	1078.02	337.339	820.97	466.229	485.992	320.998	409.875	930.502	925.972	549.518	1148.75	862.438	889.185	1175.36	805.134	1908.38	993.8	1147.23	1854.89	387.984	337.333	419.427	156.515	216.494	187.093	3593.66	1123.96	1271.98	1937.73	1174.97	871.913	372.243	1399.67	567.328	174.461	271.84	187.906	227.113	167.791
2	28	8	70J24	CONTIG4201	3926.51	12188.4	4719.83	13801.5	10571.7	34937.3	8303.5	20038.6	10459.4	1909.48	1482.11	1417.55	13587.4	15230.3	8353.88	19454.1	14486	17579.1	22096.3	13518.3	29695.6	15694.8	16423.1	29796	3391.75	4613.46	9985.27	1666.62	661.019	1834.43	32385.8	17693.4	17999	17964.4	13090.5	9547.08	4462.57	19869.7	7634.2	4510.29	6459.67	2024.83	10610.9	12890.2
2	1	9	64F12	CONTIG12795	1584.5	3702.22	2288.6	1043.3	1550.17	1884.19	1516.86	3690.07	2056.33	2459.03	2370.89	3013.56	1315.8	2196.64	1070.95	2741.37	2730.23	1700.15	2472.54	643.897	2320.93	1976.81	2006.03	2738	2325.44	1566.34	1408.07	737.29	1133.32	1011.76	4014.86	1999.75	2900.29	1328.83	1413.82	1121.03	567.598	2336.41	1879.45	848.894	777.711	2205.33	988.159	965.447
2	2	9	64J12	CONTIG12921	834.416	1860.17	893.282	727.504	1086.8	1501.06	955.823	2807.22	1780.6	1089.72	1010.79	1503.8	2037.36	4025.54	1762.26	1988.06	3398.19	1764.19	4214.27	1300.94	5415.54	5377.77	4502.53	6751.11	1555.28	2210.45	3293.35	773.413	707.181	1020.86	8350.01	4884.81	7315	1478.68	1635.66	996.102	418.632	2987.24	2131.15	1209.27	1297.06	906.706	1048.27	1172.83
2	3	9	64N12	CONTIG13048	543.69	1260.09	611.777	1113.38	2376.98	2847.77	2147.01	4094.2	2658.32	659.278	623.02	1132.16	3570.66	5875.81	3448.41	4419.28	7368.87	3928.05	6423.87	2823.54	7930.96	5637.07	4551.11	7736.72	727.743	1033.36	1203.67	395.562	384.402	450.585	8121.9	3638.74	4684.73	1737.71	2190.64	1323.79	1416.87	6635.75	2879.14	1407.38	1771.57	1555.07	1542.94	1589.07
2	4	9	64B24	CONTIG12680	237.874	167.53	368.436	136.681	177.685	145.923	216.617	282.096	155.882	749.076	755.588	853.64	290.99	261.289	181.274	323.711	183.49	133.236	360.742	157.997	308.623	152.625	205.432	112.334	304.921	225.614	60.8687	126.156	266.529	188.936	249.605	109.844	116.948	259.158	96.8841	333.084	131.283	204.664	265.708	88.3232	164.503	261.801	159.022	60.3704
2	5	9	64F24	CONTIG12811	396.972	772.669	478.324	1094.16	2418.08	3034.95	2579.92	3797.83	2457.09	1650.33	1877.25	1835.41	559.317	788.019	470.3	523.975	499.255	416.542	2244.53	718.907	2863.01	3394.34	3080.13	4097.5	1510.06	2311.18	3254.43	1341.43	1206.32	1304.45	6104.23	4470.45	5661.72	512.654	543.83	534.925	1121.93	5263.44	2806.16	1272.43	1218.84	1205.17	1715.49	3628.83
2	6	9	64J24	CONTIG12941	1375.77	4022.25	1732.65	355.638	579.886	1029.76	370.512	960.367	614.225	1260.16	1525.8	2074.54	491.232	765.859	440.145	1278.1	1243.53	879.689	1839.8	816.225	2197.61	1001.36	794.639	1469.8	1107.43	770.561	843.417	516.037	571.769	763.514	909.84	623.296	860.436	1408	1304.11	1009.03	256.6	626.308	585.889	860.209	662.613	717.689	401.91	316.139
2	7	9	64N24	CONTIG13062	63.0552	43.2811	48.2636	147.191	144.16	82.4929	252.392	3.81905	135.475	59.8459	195.566	91.6986	86.3165	101.777	41.5003	59.0125	56.98	131.609	43.2956	103.889	33.924	128.752	131.817	57.702	121.856	138.178	358.723	102.67	114.703	163.673	74.3787	62.6223	51.7344	102.836	39.5283	127.59	87.4154	38.9459	66.629	110.515	47.3327	90.0531	273.107	322.08
2	8	9	65B12	CONTIG13162	2903.99	7380.36	3099.11	1264.38	2375.66	3952.21	1259.73	2585.53	1450.77	1059.73	1127.29	1187.16	1865.69	3015.12	1709.92	4232.12	5247.19	3699.84	6891.48	3227.56	8555.85	4834.62	4151.29	7332.75	1645.08	5801.68	3173.52	1678.23	869.141	1719.15	10361.1	4238.4	5883.25	4488.63	4718.72	2950.91	1662.04	8794.73	4143.3	4031.13	4451.03	2702.32	2482.78	2761.36
2	9	9	65F12	CONTIG13308	34641.9	56411.4	38743	78015.1	112878	105183	82981.2	74946.4	75619.3	57439.4	54302	64915.8	80581.1	69423.2	73375.4	102729	93891	67010.7	92771.1	72807.7	90568.5	71318.5	61746.3	79787.6	74669.7	111357	83768.5	98844.7	67712	71309.4	88948.3	52009.9	102069	85353	75208.7	63231.3	73074.4	96522.5	90563.1	68526.6	73573.5	63265.5	80609.3	72047.5
2	10	9	65J12	CONTIG1444	137.197	397.355	179.401	135.899	345.773	228.295	230.694	367.399	290.904	901.023	885.797	1204.61	245.751	320.465	352.233	634.805	467.988	388.683	1035.43	430.084	769.535	232.345	316.421	255.579	561.722	473.168	695.656	289.389	432.421	410.492	432.64	605.467	501.872	349.42	201.521	425.059	211.472	860.524	595.659	438.099	311.52	442.708	176.791	121.185
2	11	9	65N12	CONTIG1568	2925.53	10821.2	3415.87	521.918	696.526	1200.18	841.176	2057.42	1174.09	3217.2	2256.74	3180.61	1229.7	2043.18	1003.86	3718.63	3494.05	2881.06	1624.38	740.175	1857.49	2588.43	2357.01	3911.37	1444.98	2138.57	2200.96	5190.95	3026.61	5723.13	31758.4	22115.7	32485.1	55430.8	56735	35198.1	12515.2	46959.9	26442	27505.6	29353.4	23162.7	2368.88	2974.21
2	12	9	65B24	CONTIG13180	291.997	535.621	348.471	578.121	843.951	1509.67	876.29	1449.45	1065.26	830.203	647.9	803.747	935.813	1952.03	796.871	565.531	899.365	595.536	1975.89	794.324	2234.54	1440.43	1337.01	1901.77	488.537	776.048	1207.1	333.462	464.723	355.06	2631.01	2065.68	2881.33	950.328	635.852	670.438	418.567	2242.21	2275.11	2027.07	926.614	313.77	389.683	280.049
2	13	9	65F24	CONTIG13335	145.075	47.7163	74.8937	146.392	194.934	56.6233	286.985	65.3546	125.783	179.991	267.087	44.3347	93.306	102.987	78.2469	28.3629	98.3277	62.1581	62.1167	60.4533	93.1918	30.1526	57.3517	105.569	135.407	190.515	177.371	63.8354	192.585	147.831	93.4642	44.6369	65.7044	34.2643	164.707	183.905	110.058	78.4586	244.671	111.012	60.149	133.286	273.534	43.3289
2	14	9	65J24	CONTIG1461	6981.58	17505.4	7405.24	1808.91	2521.12	4760.52	2188.9	4207.33	2039.01	1060.84	894.291	1409.08	10404.6	12666	9234.9	23257.8	24809.1	21124.1	26108	15376.2	32775.9	19763.8	14808.4	30241	2505.53	4296.73	4867.94	2631.19	1126.18	3041.83	14835.3	5967.32	8598.61	8447.37	7516.42	4591.01	1401.87	5777.75	2482.2	3328.93	6100.35	3268.17	1103.5	1607.8
2	15	9	65N24	CONTIG1585	5806.05	17958.5	6531.02	3472.91	4787.47	10057	2465.77	5385.65	2962.04	3896.73	3143.54	4482.47	14524.6	21559.7	12686	14422	13964.3	12724.6	38043.1	19857.5	40934.8	17113.4	14654.6	27734.8	6923.07	9560.37	12296.4	20297.5	10110.3	21126.8	40754.9	19607.6	24344	44001.5	52129.4	35511	4688.95	19167.9	10295.9	57236.6	54277.9	21126.7	2410.25	2891.95
2	16	9	66B12	CONTIG1753	1739.9	5865.51	2301.58	11200.9	14663.7	29588.4	13602.1	22628.2	13842.5	2688.13	1935.65	3040.79	13576.3	19709.5	12561.1	18066.9	18201.9	15212.5	24284.2	14339.6	32367.1	26801	19755.9	38930.5	17771.6	32493.8	37985.2	4003.5	1794.95	4076.29	39318.1	32027.4	36420.7	6463.59	5804.98	3519.43	17044.3	62967	26761.8	5743.44	8842.73	8827.06	19008.3	24162.4
2	17	9	66F12	CONTIG1900	2066.32	5034.56	2204.23	3811.71	5508.12	8892.12	3429.37	5647.58	3140.27	3633.21	2755.65	5099.28	4228.29	4495.16	4095.75	4580.11	4505.11	3941.15	8073.37	5359.16	11306.1	9439.34	5717.34	14965.4	3367.94	7192.93	7980.45	13017.3	5574.71	14201.8	18484.1	7392.35	8829.14	4331.81	3566.7	2151.41	1846.76	7294.93	2716.25	209.74	142.046	138.265	6174.93	9099.89
2	18	9	66J12	CONTIG2057	2999.73	11566.4	3862.77	12380.8	14201.5	33346.6	9913.68	20765.7	12811.2	5686.18	4273.52	6405.82	20661.8	26690.8	16373.8	41048.4	31566.3	33059.9	46573.1	27181.3	40063	38340.6	34559.3	54538.3	26286.4	35932.9	38025.7	9574.11	4824.36	10465.2	41659.8	21816.6	31344.8	6896.01	5490.71	3538.86	8405.97	32910.9	14496.7	4672.75	8637.75	9205.13	12527.4	17022.5
2	19	9	66N12	CONTIG2212	411.368	1134.87	564.029	912.461	887.816	1933.11	644.67	1579.09	766.094	1527.73	1183.19	1333.85	2744.87	3601.67	2146.77	14668.1	13213.2	13032.9	8163.26	4512.14	10811	7728.18	6511.66	13128.5	6643.02	11963.1	16025.1	13918	6350.09	14946.4	35786.9	17521.5	23203.4	39717.8	39451.3	22180.2	11882.2	43784	17360.8	8129.44	13757.8	7131.57	12734.8	15946.4
2	20	9	66B24	CONTIG1770	1305.4	3661.94	1731.42	417.158	443.957	1284.7	323.513	877.964	571.879	852.117	623.436	676.472	892.505	1424.67	621.936	1580.85	1157.87	1132.32	1732.55	1046.04	2645.33	871.876	844.325	1627.14	849.112	630.385	769.097	554.183	327.018	635.785	3809.05	1774.36	1611.8	1472.03	1383.52	921.699	303.316	1236.22	899.265	813.926	903.753	619.657	814.082	803.609
2	21	9	95B12	mCA038436	311.506	435.522	546.581	251.76	228.154	480.337	343.882	365.428	148.173	703.138	656.213	696.878	260.076	307.243	237.68	477.563	376.112	467.774	678.911	538.989	913.544	225.584	338.193	468.515	450.693	488.055	541.331	466.968	510.042	654.887	287.532	351.935	293.992	191.301	156.626	301.163	298.199	678.146	436.634	530.826	458.721	599.559	185.616	154.097
2	22	9	66F24	CONTIG1916	1331.56	5220.53	1812.63	3834.82	3798.91	14174.1	822.092	2399.4	1061.43	861.204	741.572	787.285	2600.14	3877.14	1990.86	2000.27	1641.09	1943.85	2580.13	1446.17	4144.53	1751.45	2215.46	3043.82	1230.59	1848.48	2887.6	2141.38	1111.81	2270.73	8549.82	3898.16	5861.82	1843.83	1296.5	1101.5	2092.46	10012.8	4648.49	2134.32	2503.87	1523.2	1624.86	2092.39
2	23	9	66J24	CONTIG2075	323.894	1033.3	423.951	386.176	337.639	956.885	424.974	422.606	389.029	570.123	467.097	424.158	413.204	584.256	479.737	689.158	538.468	764.98	1522.84	935.202	1025.29	830.728	480.292	743.174	701.418	673.917	1017.05	566.134	773.658	740.417	1075.59	741.652	843.852	762.142	570.829	654.05	463.594	927.052	1243.64	1084.82	991.894	709.957	500.364	560.173
2	24	9	66N24	CONTIG2225	2459.5	6837.86	3212.67	12133	9181.04	25388.4	6709.93	13415	8765.16	3401.11	2671.73	3028.49	6134.49	7588.12	3718.09	12495.8	9593.81	10610.4	22043.4	14385.2	34749.6	16036.5	15171.9	29212.7	13279.7	20051.9	31124.9	8268.07	3385.29	9663.01	38492.2	24528.5	20558.2	16781.8	14252.5	9490.46	7253.19	29967.1	13106.1	12775.3	18841.1	5558.24	12293.4	12779
2	25	9	67B12	CONTIG2376	3367.58	13887.4	4295.28	9465.14	7883.05	24678.3	3568.51	10526.7	5071.75	4224.03	2864.02	3736.7	19636.7	27422.2	16626.5	19612.2	13876.4	20633.2	16018	7321.94	18423.2	8620.83	8816.41	18215.4	10256.1	13553.9	23725.1	12882	6080.04	13156.4	31091.6	14569.7	22268.4	21829	15263.2	11999.3	9383.97	33603	17002.7	10760.8	17524.9	10071.8	8863.67	10183.9
2	26	9	67F12	CONTIG2519	1052.5	3031.86	1340.34	1923.66	1404.07	4839.89	1400.42	3413.8	1738.18	1245.12	1375.74	1288.39	3683.31	4243.22	1970.99	2065.85	1775.99	1690.87	2725.47	1719.04	4423.54	2449.2	2291.61	4799.35	891.261	1328.95	2328.32	747.675	332.046	949.603	15668.5	6568.03	5904.03	3478.77	2531.08	1751.88	2691.24	12086.9	4366.47	1693.26	2793.4	1321.42	674.473	782.834
2	27	9	67J12	CONTIG2678	606.295	2222.75	750.209	217.626	143.958	327.275	159.944	249.099	79.9598	715.891	581.845	683.771	35259.8	44738.3	32386.9	83311.3	69673.9	58230.2	56126.1	68653.1	50760.6	61298.4	51779.8	56303	45478.9	50801.5	61717.7	16559	7002.85	17476.2	44280.3	35866.2	44491.1	47215.1	38262.7	25475.7	51811.3	75439	60349.8	45104.3	54971.4	30411.1	10213.9	11515.9
2	28	9	67N12	CONTIG2827	4948.15	14157.2	5714.26	3989.58	3065.98	9829.52	1307.58	3544.33	1928.3	3654.65	2944.72	3151.75	3110.34	3734.02	1733.89	15717.6	9783.06	15566.2	10612.3	6758.05	14368.2	6327.27	6659.05	13295.5	4279.42	5097.13	8524.24	6089.28	2208.5	6551.36	17274.1	7072	7948.55	16719	13461.4	9223.13	1168.87	3911.11	1981.69	3016.76	4694.26	2350.89	2775.08	3107.91
2	1	10	60J24	CONTIG10886	114.249	51.2037	182.576	99.2091	216.552	94.7567	377.809	128.265	238.191	113.206	268.609	255.839	108.773	161.737	32.7027	44.271	45.7625	132.298	35.4192	91.0454	42.7211	224.322	136.524	12.3516	97.5663	13.7094	166.344	150.845	296.752	72.3395	210.15	56.073	84.8416	192.474	46.8165	197.743	36.1388	209.81	235.915	92.5457	255.446	130.52	284.442	579.522
2	2	10	emp	emp	130.113	110.074	229.249	198.662	317.188	259.742	103.841	248	104.691	146.769	317.308	310.312	104.055	103.406	77.2567	130.933	71.0336	60.484	87.2973	90.4048	50.2443	96.2279	47.7457	34.8542	129.199	104.666	193.907	153.604	269.138	137.835	141.022	37.0962	29.0498	164.119	91.5462	229.243	118.318	290.58	249.855	157.264	84.4585	197.188	374.783	331.723
2	3	10	60N24	CONTIG10989	123.437	75.2914	55.4488	161.691	283.979	158.415	450.853	67.6357	173.167	238.585	88.3133	322.056	125.452	33.4674	100.847	67.576	130.096	89.9042	86.1735	98.9305	60.4956	143.532	25.326	86.4247	213.152	203.804	182.286	142.818	260.5	246.084	216.196	56.5309	117.406	110.01	64.2268	305.136	4162.93	66.1321	220.257	355.934	167.408	159.995	273.98	614.382
2	4	10	61B12	CONTIG11084	2509.44	7376.17	2717.3	289.207	426.195	467.117	320.149	925.498	574.658	495.978	640.702	742.326	305.373	456.265	390.374	770.721	768.387	549.446	928.161	156.943	436.945	642.295	566.269	764.645	683.931	381.165	217.528	158.707	303.176	236.47	518.495	453.745	601.269	509.115	600.342	426.063	180.313	533.412	426.323	271.787	314.901	525.922	381.767	214.295
2	5	10	61F12	CONTIG11198	59879.6	65972.4	59581	10162.9	13733	18614.4	52651.6	60851.7	57108.3	8697.89	9257.91	10761.4	16586.3	26522.5	16456.3	15289.2	21932.6	18264.5	15697.8	10239.4	15374.8	18743.8	13098.7	21072.4	8281.49	9463.55	9422.25	6115.09	4416.33	6200.35	21681.4	12603	12821.9	14936.3	23471.3	14518	3075.69	7398.66	5501.67	4514.32	4722.08	3199.94	5030.45	7005.61
2	6	10	61J12	CONTIG11365	440.773	1281.81	550.898	1713.12	3091.37	4540.33	3888.16	7058.4	4033.6	519.697	510.799	561.007	1642.74	3126.85	1636.66	3034.22	3976.54	1871.73	4140.88	1729.32	5798.17	5363.13	4447.07	7708.88	1032.51	1507.31	1677.84	307.715	330.918	476.509	7789.24	3907.18	4597.28	2069.01	2367.96	1927.02	2617.97	11249.2	5610.49	3727.25	3155.65	1990.01	2422.7	2532.03
2	7	10	61N12	CONTIG11495	961.773	2836.68	1426.05	815.537	1227.65	1779.77	1387.42	2731.03	1831.83	2294.73	1974.01	2687.76	1113.6	2068.21	1055.69	2685.63	3131.11	2055.79	13307.6	6070.12	13747	13738.3	11244	19134.8	12597.3	16837.3	25480.1	4592.2	3333.31	5474.83	45263.5	34566.7	53345.1	47041.7	52128.7	34257.9	47158	79864.9	67434.6	57274.4	61282.3	19779.2	17927	21943.4
2	8	10	61B24	CONTIG11098	609.727	2072.28	969.302	116.88	177.032	269.844	187.485	308.94	168.433	437.117	477.323	677.933	196.139	330.609	197.923	350.68	387.441	286.121	476.862	238.992	403.142	237.634	237.578	331.433	353.568	193.815	163.43	96.7492	133.877	128.245	310.894	153.529	278.473	208.59	216.051	207.863	166.787	165.709	183.768	166.785	119.299	140.154	141.3	81.5371
2	9	10	61F24	CONTIG11232	4808.53	15745	5618.97	11607.9	18936.8	32713.3	3256.25	7312.25	4126.71	703.696	724.315	828.148	7544.58	10955	8741.66	3785.61	4158.35	3117.24	1464.35	533.255	1582.46	1252.01	979.563	1877.06	806.166	814.873	852.409	1205.73	813.385	1336.9	13458.7	5849.43	9179.31	517.956	285.436	374.317	1975.32	9175.48	4920.45	1037.44	1076.82	1216.14	543.271	646.469
2	10	10	61J24	CONTIG11379	1088.94	3751.64	1968.47	1691.1	2768.83	3911.28	1395.76	2406.09	2247.68	2050.34	2165.97	2174.93	1426.65	3463.45	2228.25	3740.9	4088.19	3071.36	7055.32	3442.6	6558.32	4786.99	3095.49	5055.19	3848.45	3585.31	4695.91	1603.89	2746.97	2049.41	2891.06	3000.15	3925.12	2193.55	2313.27	1536.35	1248.67	3313.23	4767.32	4312.83	3833.07	1764.08	2963.61	2963.06
2	11	10	61N24	CONTIG11513	1080.62	3604.86	1914.86	5623.3	7665.77	15826.3	4312.44	8472.24	5155.63	3793.79	4397.91	4509.21	2794.43	5078.13	3038.97	4685.98	4528.45	3563.58	15766.1	6469.65	13930.3	13423.1	10316.4	20895.8	6658.07	8785.31	12602	3059.57	2505.21	4362.74	10537.2	4776.3	8018.76	4258.76	3274.92	2947.83	1802.68	8764.77	5373.53	3673.63	4481.53	3765.42	2300.35	2580.38
2	12	10	62B12	CONTIG11588	4367.58	10622.7	4853.84	27653.7	37013.3	60862.9	25283.1	41564.8	25764.4	8084.36	6147.27	8835.51	7277.46	10279.1	6500.92	5405.18	5437.97	4130.58	14618.7	7519.48	17208.8	15134.7	11043.1	23351.2	9172.19	15477	21951.6	8881.46	4315.79	9894.55	36833.1	16222.2	24606.8	30879.8	28834.2	17899.3	18951.6	60745.4	30126.3	33374.8	44437.6	14579.3	3130.57	4281.99
2	13	10	62F12	CONTIG11735	2949.97	8677.8	3296.25	22869.4	32100.4	57688.1	12814.7	25031.8	13803.8	3398.71	2615.36	4069.44	33172.4	47132.3	49236.8	43272.4	46612.8	35750.4	44214.3	23172.5	39880	41735.9	29322.9	48206.9	35028.6	52253.5	54537.8	4606.47	2487.09	4861.17	39052.6	30871.7	48905.3	13807.3	13050.8	8566.42	48801.3	65741.7	57420.3	27456.1	36924.6	22041.6	24207.5	30259.6
2	14	10	62J12	CONTIG11855	2278.44	8730.8	3160.64	996.114	1340.06	3017.31	1494.41	3013.13	1620.07	1147.33	888.087	1057.42	1035.36	1536.06	935.46	2013.43	1998.91	1572.52	10936.8	5085.37	13502.8	6923.91	5950.01	12769.4	3573.9	5145.89	7262.33	500.903	395.89	767.405	15321.8	6830.28	8850.78	8631.49	8208.49	5599.44	7133.53	28783	14294.6	6567.02	8581.42	4706.26	2799.31	3158.66
2	15	10	62N12	CONTIG11974	4958.68	19520.5	6712.48	13863.4	17117.1	34345.5	12004.3	24998.6	14451.1	2476.29	1827.07	2174.45	9671.02	16326.8	8140.66	14617.8	14848.4	10566.2	38188.3	18362.2	44980.7	24669.7	23436	43578.8	9279.09	12563.7	18485.3	1555	896.584	1669.31	22092.5	25814.5	33820	26956.9	26866.5	20115.4	10154.1	39836.4	22581.9	15826	16913.8	6012.38	7772.6	8325.82
2	16	10	62B24	CONTIG11601	4227.91	10939.9	4274.5	10871.7	14537.7	25343.1	8767.68	16011.6	8734.89	8298.87	7094.45	12048.9	12989.6	14393.5	13009.7	25846	24100.6	19588.9	46616.6	33549.8	42217.5	46056.3	31894.4	45604.1	20893.3	33762.3	38661	12475.4	6320.22	13641.9	31814.5	12083.2	21361	48149.6	43647.7	23475.2	17064.4	50460	22203.1	12142.7	21955.1	15196.4	7015.61	10026.5
2	17	10	62F24	CONTIG11750	200.947	758.583	333.701	68.0479	193.432	271.237	86.9437	117.311	115.708	501.677	639.446	761.981	101.694	113.978	130.288	371.705	165.261	161.774	311.383	158.691	238.976	126.188	132.722	169.61	297.164	228.362	249.863	115.847	146.855	137.204	166.517	141.055	113.47	194.93	239.594	243.838	223.491	139.455	242.349	117.285	193.234	130.61	171.034	83.3741
2	18	10	62J24	CONTIG11870	73.4871	106.065	147.617	47.416	247.473	134.258	213.152	139.84	98.0285	234.413	246.092	163.225	136.734	73.4964	85.5489	206.326	161.772	113.546	240.275	149.486	271.559	64.357	117.974	42.2244	281.878	253.548	271.443	274.731	243.386	216.295	174.352	202.427	203.864	244.746	18.0839	364.42	119.158	310.166	428.653	186.957	99.8099	250.677	84.2795	75.1054
2	19	10	62N24	CONTIG11991	1144.12	3097.82	1254.72	7331.93	7541.5	16656	5173.61	11068.6	5763.21	2322.59	1614.9	2406.12	6698.84	9451.71	5878.03	40827	35539.2	33467.6	52835.6	42919.2	47304.2	43265.7	34032.5	46920.4	7221.45	13089.1	20120.6	2365.53	1057.16	2420.7	18938.1	8205.77	8704.94	18490	17747.1	12029.8	1879.38	8606.13	3360.98	9858.12	13074.1	4999.68	727.163	852.72
2	20	10	63B12	CONTIG12144	2237.1	6531.78	2789.46	449.112	547.074	1161.19	1874.42	4408.3	2214.21	1589.72	1212.12	1624.63	2608.22	3805.89	1972.5	6144.45	5132.56	5205.01	15661	8923.18	20096.8	20398.4	16706.9	29502.2	17596.9	31340.5	39124.6	7710.63	3628.35	7932.45	43289.3	27384.3	31514.5	36013.7	34229.3	21936.1	35780.6	75123.5	50491.3	20930.2	31957.3	26040.5	18288.7	21709.5
2	21	10	63F12	CONTIG12295	94.8829	114.064	155.12	187.939	252.521	216.614	290.592	343.368	129.563	316.046	241.03	155.103	164.239	74.2264	94.913	56.6697	57.0067	33.1632	67.7027	190.029	27.1034	65.6064	100.971	65.3412	184.746	169.884	102.72	129.542	140.685	70.8654	115.853	110.634	99.2509	56.7172	131.444	251.602	123.057	96.4704	134.334	197.56	221.852	209.444	208.852	210.791
2	22	10	63J12	CONTIG12426	1791.8	4953.13	2011.45	17696.2	16932	42530.9	13427.7	27452.2	14486.3	4373.28	3546.14	4846.32	25522.4	30182.1	20565.1	34719.6	29953.7	33877.2	39159.3	25992.5	39598.9	31459	26346.5	47367.3	22707.3	39343.6	48200.1	9776.81	4445.47	10844.8	38555.9	26899.8	38570.2	8879.34	7342.56	4503.07	27086.8	66876.2	29034.4	8792.26	13619.8	8577.61	11640.8	15650.8
2	23	10	63N12	CONTIG12560	188.021	639.975	227.005	455.885	415.965	974.818	270.323	620.354	300.027	407.815	233.858	290.656	2892.74	3752.09	1969.95	2498.23	2005.45	1865.78	4714.41	2497.51	6967.15	3275.67	3255.97	6618.4	995.182	1827.75	3354.47	858.018	394.465	1013.45	17985.7	7639.13	7898.71	6927.86	5695.86	4443.36	1431.97	5783.54	2281.86	3035.33	3388.89	873.001	1996.36	1962.75
2	24	10	63B24	CONTIG12172	393.227	436.392	853.943	418.686	482.853	520.68	260.582	786.692	385.237	2403.17	1903.46	2084.96	386.971	514.099	520.153	1046.34	547.116	604.465	882.595	519.795	742.526	468.332	467.784	390.952	1038.31	669.279	483.294	447.297	620.376	588.273	430.316	541.658	494.482	809.222	435.921	571.772	330.163	1121.35	765.47	460.43	502.206	1011.91	255.142	257.823
2	25	10	63F24	CONTIG12312	2507.6	7721.94	3298.2	2145.29	1793.7	4868.85	1383.18	3398.71	1877.94	3101.54	2822.67	3623.77	2335.18	2690.13	1820.63	5620.3	4272.67	4965.35	6221.92	3866.84	8033.2	5086	4577.72	9447.63	3298.5	3657.59	5044.55	7614.13	3406.32	8062.47	19450.1	8220.1	10290.4	7505.72	5499.3	3600.34	2421.46	8312.79	3943.73	2663.03	4900.97	2712.02	1827.15	2042.73
2	26	10	63J24	CONTIG12448	1099.55	3315.06	1394.1	1180.41	875.926	2826.56	1180.83	3660.75	1805.53	1478.76	1254.87	1427.15	1863.34	2439.72	1207.16	6758.65	4515.96	6551.36	46993.6	26460.8	52584.1	9332.81	10459.8	19846.7	5078.46	6073.26	10704.2	1393.8	660.695	1545.58	32796.7	12823.1	16648.8	7444.9	6721.43	4302.38	2064.73	7740.09	4175.13	5092.03	6834.97	2976.64	388.569	477.562
2	27	10	63N24	CONTIG12577	100.921	77.46	82.6942	204.088	214.948	243.181	301.612	91.3944	66.0209	398.958	567.865	227.574	168.354	127.768	99.8274	154.612	46.1867	145.296	248.113	197.835	221.76	177.401	122.763	72.0864	240.784	114.349	376.534	433.168	357.451	455.053	102.628	154.203	100.279	320.599	14.4524	358.101	343.281	428.307	184.821	155.852	150.821	322.353	295.485	29.7433
2	28	10	64B12	CONTIG12665	162.497	74.5187	78.462	230.652	233.566	89.7233	234.788	191.859	186.876	230.343	107.877	204.927	93.1538	60.2673	82.7291	74.8759	176.081	40.2429	51.5806	81.8037	55.0014	86.5845	46.5566	71.8632	135.141	168.134	193.508	50.5979	238.868	262.575	151.942	83.137	43.9729	180.188	86.1098	384.632	37.7972	202.558	111.868	129.413	146.271	223.519	405.997	2145.83
2	1	11	57B24	CF494043	73942	79794.1	75069.4	28395.6	31970.2	44854.6	49872.1	73633.3	63085.2	39724.5	40660.7	49904	52109.3	57749.3	50741.9	60498.6	58451.6	50594.1	60168.7	41784.6	57734.8	57912.9	48284	56274.4	32215	38254.7	34216.7	37337.7	24116.7	43842.7	60060.9	42661.3	47883.9	48557.4	55752.5	42617.9	11568.3	29261.1	14538.5	23262	21098.2	31045.4	33414.9	48560.1
[truncated: 36,567 more rows]
