# Supplementary material for: Anti-schistosomal Intervention Targets Identified by Lifecycle Transcriptomic Analyses
Source: PLoS Negl Trop Dis. 2009 Nov 3;3(11):e543. doi: 10.1371/journal.pntd.0000543 (PMC2764848; doi:10.1371/journal.pntd.0000543)
Supplement: Dataset S5 — Schistosome transcripts demonstrating constitutive expression. The column description worksheet provides details as to each column header. Subsequent worksheets identify the constitutively expressed transcripts (less than 1% variation in expression across all life-stages examined, ‘constit_1pc_copy.txt’ worksheet), provide details as to Gene ontology (GO) enrichment (‘constit_1pc_GO.xls’ worksheet) and list those that have sequence similarity restricted within the Platyhelminthes (‘Platyhelminth restricted’ worksheet). (0.54 MB XLS) [file pntd.0000543.s005.xls]

## Sheet: Column Description
Microarray Information
Block		Microarray oligonucleotide co-ordinates
Column		Microarray oligonucleotide co-ordinates
Row		Microarray oligonucleotide co-ordinates
ID		Unique oligonucleotide identification
Name		Oligonucleotide name
oligosequence		Oligonucleotide sequence
Trimmed_oligoseq		Trimmed oligonucleotide sequence
BLAST Information
hit1accession		First database hit ID of the submitted sequence
hit1id_lrge		Identifier for the database aligned sequence
hit1name_lrge		The highest scoring alignment described by one line summary
hit1length		The length of alignment
hit1score		The (bit) score of the highest-scoring segment pair found for the database sequence
hit1evalue		The number of times one might Expect to see the hit alignment by chance
hit1frame		The reading frame of the alignment in the hit sequence
Smp Mapping (GeneDB)
Smp Hit		Smp gene ID that contained a 70% ungapped match (or better) to the microarray oligonucleotide
Smp.description		The highest scoring alignment described by one line summary
Amino_acids_1		Lengths of the CDS hits
Amino_acids_2		Lengths of the CDS hits
CDS_Sense.Antisense		Sense/antisense orientation of each Smp match
CDSHits		Number of different Smp genes hit by the oligo (70% match)
Genome mapping (Wellcome Trust Sanger Institute)
GenomeHits		Contig containing a 80% match to the microarray oligonucleotide
InterPro Searches
Pfam_ID		Identifier for the Pfam aligned domain
Pfam_name		Description for the Pfam aligned domain
PFAM_IPR_ID		InterPro Identifier for the Pfam aligned domain
PFAM_IPR_Desc		InterPro Description for the Pfam aligned domain
PFAM_IPR_2_GO		InterPro Gene Ontology for the Pfam aligned domain
SMART_ID		Identifier for the SMART aligned domain
SMART_IPR_ID		InterPro Identifier for the SMART aligned domain
SMART_IPR_Desc		InterPro Description for the SMART aligned domain
SMART_IPR_2_GO		InterPro Gene Ontology for the SMART aligned domain
ncbi_evals		E values from NCBI BLAST searches
comp_strand		Strand code
GOI		Gene of Interest
Expression Information
logFC	log base 2 fold change of the gene/probeset; a positive value indicates up regulation, while a negative value indicates down regulation
AveExpr (underneath each designated life stage)	average log2 signal intensity of the probeset across ALL arrays
t	moderated t-test values
P.Value	raw (uncorrected p value)
adj.P.Val	adjusted p value, corrected using Benjamini & Hochberg method for multiple testing
B	natural log odds of p(gene is differentially expressed) / p(gene is not differentially expressed); probesets with B > 0 are thus more likely to be differentially expressed than not
UT01	Egg
UT02	Miracidia
UT03	Mother sporocyst
UT04	Daughter sporocyst
UT05	Cercariae
UT06	3 hr Somules
UT07	24 hr Somules
UT08	3-day Somules
UT09	6-day Somules
UT10	2-wk Worms
UT11	3-wk Worms
UT12	5-wk Worms
UT13	7-wk Mixed Worms
UT14	7-wk Male Worms
UT15	7-wk Female Worms
Remaining UT columns display pairwise comparisons as indicated in Results.
Cene Ontology Information
GO:ID		Gene Ontology Identification
NodeSize		Number of calculated nodes (genes)
SampleMatch		Number of loci being analysed that had that GO term
Phyper		Hypogeometric probability of enrichment (i.e. relative to all things on the microarray that have that GO term)
Term		Gene Ontology term
Ont		Ontology
SampleKeys		The "enriched" genes SchistogeneDB ID

## Sheet: constit_1pc copy.txt
Block	Column	Row	ID	Name	oligosequence	Trimmed_oligoseq	hit1accession	hit1id_lrge	hit1name_lrge	hit1length	hit1score	hit1evalue	hit1frame	SmpHit	Smp.description	Amino_acids_1	Amino_acids_2	CDS_Sense.Antisense	CDSHits	GenomeContig	ContigStrand	GenomeHits	Pfam_ID	Pfam_name	PFAM_IPR_ID	PFAM_IPR_Desc	PFAM_IPR_2_GO	SMART_ID	SMART_IPR_ID	SMART_IPR_Desc	SMART_IPR_2_GO	ncbi_evals	comp_strand	GOI
1	5	1	91A12	CL388	TCGAGAACCTTTCGGGAAATAGAATAACCTATAATACCTGTTGAACGGTT	TCGAGAACCTTTCGGGAAATAGAATAACCTATAATACCTGTTGAACGGTT	Q6IFT8	Q6IFT8_SCHMA	Pol polyprotein	1166	261 (667)	3e-68	3	NA	NA	NA	NA	NA	NA	NA	NA	NA	NA	NA	NA	NA	NA	NA	NA	NA	NA	3e-68	SU	NA
1	25	1	93A24	CL1252	ACCAGCTCTTCACTTATCCCTTTTTCTCCATTTCTTTTTGCTTTTGTTTT	CCAGCTCTTCACTTATCCCTTTTTCTCCATTTCTTTTTGCTTTTGTTTT	Q5DDK3	Q5DDK3_SCHJA	Hypothetical protein	110	197 (500)	4e-49	1	NA	NA	NA	NA	NA	NA	NA	NA	NA	NA	NA	NA	NA	NA	NA	NA	NA	NA	4e-49	SU	NA
1	3	3	84I12	SMLA3H02	TCCAACATAATTTTGACTTTGATTCCTAGAATACCTTGGGGAAGTTGAAC	TCCAACATAATTTTGACTTTGATTCCTAGAATACCTTGGGGAAGTTGAAC	Q86DZ5	Q86DZ5_SCHJA	Clone ZZZ39 mRNA sequence	226	262 (669)	1e-68	-1	Smp_027610	40S ribosomal protein S3, putative	230	NA	-	1	shisto10760g11.p1k, shisto229b08.q1k, shisto2396h03.p1k, shisto2491e08.p1k, shisto9211c04.p1k	-, +	5	PF00189; PF07650	KH_2; Ribosomal_S3_C	IPR001351; IPR004044	K Homology, type 2; Ribosomal protein S3, C-terminal	Molecular Function: RNA binding (GO:0003723); Molecular Function: structural constituent of ribosome (GO:0003735), Cellular Component: intracellular (GO:0005622), Cellular Component: ribosome (GO:0005840), Biological Process: translation (GO:0006412)	NA	NA	NA	NA	1e-68	AA	NA
1	9	28	2A12	Contig1266	no data	TCTCGATATGCCAGTCCAAAATCAAGTTCACAATCTCACATATACTCTAT	Contig1266	-	UNKNOWN 620	UNKNOWN 620	hypothetical protein; sequence orphan; low similarity to glycoamylases and other	OM0023353-AOP	-	NA	NA	NA	NA	NA	NA	NA	NA	NA	NA	NA	NA	NA	NA	NA	NA	NA	NA	1	UU	NA
1	18	28	3000000000000	Contig1634	no data	GAAAAAGAGTTCTACCACCTAACTGGAAGTATGATAGTTCCACAGC	Contig1634	-	SIMILAR TO RIBOSOMAL PROTEIN S13 (2E-68)	SIMILAR TO RIBOSOMAL PROTEIN S13 (2E-68)	-	OM0023385-AOP	-	Smp_096750	expressed protein	151	NA	+	1	shisto10279c01.q1k, shisto8315e01.p1k, shisto1945d07.q1k	-	3	PF00312; PF08069	Ribosomal_S13_N; Ribosomal_S15	IPR000589; IPR012606	Ribosomal protein S13/S15, N-terminal; Ribosomal protein S15	Molecular Function: structural constituent of ribosome (GO:0003735), Cellular Component: intracellular (GO:0005622), Cellular Component: ribosome (GO:0005840), Biological Process: translation (GO:0006412); Molecular Function: structural constituent of ribosome (GO:0003735), Cellular Component: ribosome (GO:0005840), Biological Process: translation (GO:0006412)	NA	NA	NA	NA	1	US	NA
1	24	28	3M24	Contig1683	no data	TCTCACCAGATTTAGACGAAGAAAATGAAAACGATGAAGAGGATGAAGAT	Contig1683	-	SI9MILAR TO PROTEIN PHOSPHATASE 2A INHIBITOR-2 I-2PP2A (SET TRANSLOCATION) 1E-69	SI9MILAR TO PROTEIN PHOSPHATASE 2A INHIBITOR-2 I-2PP2A (SET TRANSLOCATION) 1E-69	-	OM0023385-AOP	-	Smp_155060.2	set, putative	272	NA	+	1	shisto11155e09.p1k, shisto11914e10.p1k, shisto5175f10.q1k	-, +	3	PF00956	NAP	IPR002164	Nucleosome assembly protein (NAP)	Cellular Component: nucleus (GO:0005634), Biological Process: nucleosome assembly (GO:0006334)	NA	NA	NA	NA	1	US	NA
2	16	2	88N24	SMLC30A01A	ATCCAAACCTGGGTAAACCGGAAATCCTCCCCAAAAACCGATCCAAGTCC	TCCAAACCTGGGTAAACCGGAAATCCTCCCCAAAAACCGATCCAAGTCC	Q74Z70	Q74Z70_ASHGO	AGR336Cp	179	42.7 (99)	0.011	-1	NA	NA	NA	NA	NA	NA	NA	NA	NA	NA	NA	NA	NA	NA	NA	NA	NA	NA	1	UU	NA
2	6	22	21N12	BF936584	GAGACGGTAATGCAGCTGCATGGCATGTTTTTTTTTTTTTTTTTTTTTTT	GAGACGGTAATGCAGCTGCATGGCATGTTTTTTTTTTTTTTTTTTTTTTT	Q3NKU6	Q3NKU6_SHEFR	Response regulator receiver:ATP-binding region, ATPase-like:Histidine kinase A,	1140	32.0 (71)	5.8	-3	NA	NA	NA	NA	NA	NA	NA	NA	NA	NA	NA	NA	NA	NA	NA	NA	NA	NA	1	UU	NA
2	7	22	21B24	AA825109	GACAGGCCAGTGAATTGTAATACGACTCACTATAGGGCTAGGAATTGGTA	GACAGGCCAGTGAATTGTAATACGACTCACTATAGGGCTAGGAATTGGTA	-	-	-	-	-	-	-	NA	NA	NA	NA	NA	NA	NA	NA	NA	NA	NA	NA	NA	NA	NA	NA	NA	NA	1	UU	NA
2	9	23	18F24	Contig838	no data	CGTGTTATAATTGTTCCTCGTCAATGTCTGAATGTGATGGTACTGTAA	Contig838	-	SIMILAR TO DAD-1-LIKE PROTEIN (DEFENDER AGAINST CELL DEATH 1) 1E-57	SIMILAR TO DAD-1-LIKE PROTEIN (DEFENDER AGAINST CELL DEATH 1) 1E-57	-	OM0023377-AOP	-	NA	NA	NA	NA	NA	NA	NA	NA	NA	NA	NA	NA	NA	NA	NA	NA	NA	NA	1	UU	NA
2	1	27	4B24	Contig2059	no data	TTAAATGCAAGTAAGTGTTTAAGACCATCCGCCATACCACTGGCTGGC	Contig2059	-	UNKNOWN 997	UNKNOWN 997	AF275629_1 bancal protein [Drosophila melanogaster]·	OM0023330-AOP	-	NA	NA	NA	NA	NA	NA	NA	NA	NA	NA	NA	NA	NA	NA	NA	NA	NA	NA	1	UU	NA
2	7	27	5J12	Contig2483	no data	GGTCCAAAATCCAAAGAACTCTTTTTTGATTAATCGCTCCATAAGGAGAA	Contig2483	-	UNKNOWN 1329	UNKNOWN 1329	-	OM0023340-AOP	-	NA	NA	NA	NA	NA	NA	NA	NA	NA	NA	NA	NA	NA	NA	NA	NA	NA	NA	1	UU	NA
2	13	27	5N24	Contig2510	no data	CGTGAAGCTTATCGTTCCAAAAGATATGTTCCCAAAGATTTGAGACCGAA	Contig2510	-	SIMILAR TO 60S RIBOSOMAL PROTEIN L35 (3E-09)	SIMILAR TO 60S RIBOSOMAL PROTEIN L35 (3E-09)	-	OM0023340-AOP	-	Smp_004940	60S ribosomal protein L35, putative	125	NA	+	1	shisto5005f09.p1k	-	1	PF00831	Ribosomal_L29	IPR001854	Ribosomal protein L29	Molecular Function: structural constituent of ribosome (GO:0003735), Cellular Component: intracellular (GO:0005622), Cellular Component: ribosome (GO:0005840), Biological Process: translation (GO:0006412)	NA	NA	NA	NA	1	US	NA
2	7	28	1J24	Contig1055	no data	TTGCTTACCAACTTTCAAAAAATCGAAATATCACCTATATCCCTGATGG	Contig1055	-	SIMILAR TO PROHIBITIN (1E-92)	SIMILAR TO PROHIBITIN (1E-92)	-	OM0023369-AOP	-	Smp_075940	prohibitin, putative	208	208	+	1	shisto4252b09.q1k, shistoFOS_25o06.p1kSP6	-, +	2	PF01145	Band_7	IPR001107	Band 7 protein	-	SM00244	IPR001107	Band 7 protein	-	1	US	NA
3	3	8	67K24	CONTIG2759	AAAGTTAACTGATGACGAGGTCGATGAAATGATACGTGAAGCTGATATAG	GTTAACTGATGACGAGGTCGATGAAATGATACGTGAAGCTGATATAG	Q5DA21	Q5DA21_SCHJA	Hypothetical protein	149	295 (755)	1e-78	2	Smp_026560.2	calmodulin, putative	183	183	+	1	shisto216h09.p1k, shisto5127b04.p1k, shisto6925h08.p1k	+	3	PF00036	efhand	IPR002048	Calcium-binding EF-hand	Molecular Function: calcium ion binding (GO:0005509)	SM00054	IPR002048	Calcium-binding EF-hand	Molecular Function: calcium ion binding (GO:0005509)	1e-78	SS	NA
3	13	23	19C12	SCMRRM1	no data	TACCCGCTGAACTTAAGCATATCAATAAGCGGAGGAAAAGAAACCAACCG	SCMRRM1	-	S.MANSONI 28S-LIKE RIBOSOMAL RNA, 5prime END	S.MANSONI 28S-LIKE RIBOSOMAL RNA, 5prime END	-	OM0023390-AOP	-	NA	NA	NA	NA	NA	NA	NA	NA	NA	NA	NA	NA	NA	NA	NA	NA	NA	NA	1	UU	NA
3	16	23	19O12	SM58SRRNA	no data	TGCATTTGGGTAACCGATGTATGGGATTATTGGCGTACAACTTTGAGCG	SM58SRRNA	-	S.MANSONI PARTIAL GENE FOR 5.8S RIBOSOMAL RNA	S.MANSONI PARTIAL GENE FOR 5.8S RIBOSOMAL RNA	-	OM0023390-AOP	-	NA	NA	NA	NA	NA	NA	NA	NA	NA	NA	NA	NA	NA	NA	NA	NA	NA	NA	1	UU	NA
3	17	23	19C24	SCMRRNAM	no data	GTCCTAATAATCGCCACAGCCTAGTCTGGTCTAGATGACTTGATTGAGAT	SCMRRNAM	-	SCHISTOSOMA MANSONI 5.8S RIBOSOMAL RNA (5.8S RRNA) GENE, 5prime END, 28S RIBOSOMAL R	SCHISTOSOMA MANSONI 5.8S RIBOSOMAL RNA (5.8S RRNA) GENE, 5prime END, 28S RIBOSOMAL R	-	OM0023390-AOP	-	NA	NA	NA	NA	NA	NA	NA	NA	NA	NA	NA	NA	NA	NA	NA	NA	NA	NA	1	UU	NA
3	10	24	15O12	Contig5971	no data	CTTGGAAAGTATGAGCAAGACAACAGGATCTCACCTTAGTCCGGACAA	Contig5971	-	UNKNOWN 3555	UNKNOWN 3555	-	OM0023348-AOP	-	NA	NA	NA	NA	NA	NA	NA	NA	NA	NA	NA	NA	NA	NA	NA	NA	NA	NA	1	UU	NA
3	16	28	2O24	Contig1347	no data	GATGAATTATTCCATGGTGCACCGATTCAAGATGGGAATTTCGATTATAA	Contig1347	-	SIMILAR TO MYOSIN II REGULATORY LIGHT CHAIN 5E-51	SIMILAR TO MYOSIN II REGULATORY LIGHT CHAIN 5E-51	-	OM0023353-AOP	-	NA	NA	NA	NA	NA	NA	NA	NA	NA	NA	NA	NA	NA	NA	NA	NA	NA	NA	1	UU	NA
3	25	28	4C12	Contig1978	no data	GAGTAAAAAGACATATGATCTATCTGGATCAATCCGGTCGATGGGTGAAA	Contig1978	-	SIMILAR TO 40S RIBOSOMAL PROTEIN S21 (4E-17)	SIMILAR TO 40S RIBOSOMAL PROTEIN S21 (4E-17)	-	OM0023386-AOP	-	Smp_146190	40S ribosomal protein S21e, putative	NA	NA	+	1	shisto12766c05.q1k, shisto4819h12.q1k, shisto8608e03.q1k, shisto8928f09.p1k	-, +	4	NA	NA	NA	NA	NA	NA	NA	NA	NA	1	US	NA
4	15	8	69H12	CONTIG3638	CTTACGTCTCCCCGACAAAACATTAAGTCGTCTACAAACGATTTAGTATC	CTTACGTCTCCCCGACAAAACATTAAGTCGTCTACAAACGATTTAGTATC	Q9AVH2	Q9AVH2_PEA	Putative senescence-associated protein (Fragment)	282	120 (302)	6e-26	1	NA	NA	NA	NA	NA	NA	NA	NA	NA	NA	NA	NA	NA	NA	NA	NA	NA	NA	6e-26	SU	NA
4	16	16	42D24	CD137846	AGCCGCAACAATCACTAAATTTGCAAGCAATGTGTGCAGTGTGACAATCA	GCCGCAACAATCACTAAATTTGCAAGCAATGTGTGCAGTGTGACAATCA	Q94747	Q94747_SCHMA	Elongation factor 1-alpha	465	251 (640)	6e-66	3	Smp_099870.1, Smp_189530	NA	NA	NA	-	2	shisto12743f08.q1k, shisto1467c05.q1k, shisto1887a09.p1k, shisto7296d09.p1k	-, +	4	NA	NA	NA	NA	NA	NA	NA	NA	NA	6e-66	SA	NA
4	25	19	33L24	CD096000	AGATGGCAATATCTCGACGACCATCGTTATTGTCACGATCTCTTCCACCA	GATGGCAATATCTCGACGACCATCGTTATTGTCACGATCTCTTCCACCA	Q4D2D8	Q4D2D8_TRYCR	Protein kinase, putative	604	32.0 (71)	5.7	-3	Smp_179300.1, Smp_179300.3	NA	NA	NA	-	2	shisto12047d07.p1k	-	1	NA	NA	NA	NA	NA	NA	NA	NA	NA	1	UA	NA
4	6	23	18L12	Contig865	no data	TCAAAGCAGGCGTTCCTTCCTTAGATAACTTCCTGGATAAACTATAAAAC	Contig865	-	SIMILAR TO ELONGATION FACTOR 2 (EF-2) 1E-113	SIMILAR TO ELONGATION FACTOR 2 (EF-2) 1E-113	-	OM0023377-AOP	-	Smp_143140	eukaryotic translation elongation factor, putative	196	NA	+	1	shisto10693g11.q1k, shisto10968g06.p1k, shisto7435f01.p1k	-, +	3	PF00679; PF03764	EFG_C; EFG_IV	IPR000640; IPR005517	Translation elongation factor EFG/EF2, C-terminal; Translation elongation factor EFG/EF2, domain IV	Molecular Function: GTP binding (GO:0005525)	NA	NA	NA	NA	1	US	NA
4	19	23	19L24	SMU22168	no data	TATGCTACGTTAATCACTTGATCTTGTCTCTGGTTTGGTCTATGGTTTGT	SMU22168	-	SCHISTOSOMA MANSONI 5.8S RIBOSOMAL RNA AND 28S RIBOSOMAL RNA GENES, PARTIAL SEQU	SCHISTOSOMA MANSONI 5.8S RIBOSOMAL RNA AND 28S RIBOSOMAL RNA GENES, PARTIAL SEQU	-	OM0023338-AOP	-	NA	NA	NA	NA	NA	NA	NA	NA	NA	NA	NA	NA	NA	NA	NA	NA	NA	NA	1	UU	NA
4	9	27	5D24	Contig2456	no data	TTAAAGAGGATAAGATCCCATCGGGTATACGTCACTATTGGGGATTCGGA	Contig2456	-	SIMILAR TO RIBOSOMAL PROTEIN S18 (1E-06)	SIMILAR TO RIBOSOMAL PROTEIN S18 (1E-06)	-	OM0023340-AOP	-	NA	NA	NA	NA	NA	NA	NA	NA	NA	NA	NA	NA	NA	NA	NA	NA	NA	NA	1	UU	NA
4	7	28	1L24	Contig1066	no data	GATTACTTCATTATCCTGGATTGAATTGCGGATGTGCATTTTGTGCTGTC	Contig1066	-	SIMILAR TO DNAJ-LIKE PROTEIN (1E-122)	SIMILAR TO DNAJ-LIKE PROTEIN (1E-122)	-	OM0023369-AOP	-	NA	NA	NA	NA	NA	NA	NA	NA	NA	NA	NA	NA	NA	NA	NA	NA	NA	NA	1	UU	NA
4	19	28	3L12	Contig1757	no data	GTGTGGGCAAGGTATGAGTGGATAAGGAACTGTATAAATGAAGGTAGTT	Contig1757	-	UNKNOWN 823	UNKNOWN 823	hypothetical	OM0023329-AOP	-	NA	NA	NA	NA	NA	NA	NA	NA	NA	NA	NA	NA	NA	NA	NA	NA	NA	NA	1	UU	NA
5	28	3	8700000000000	SMLC16C12	AAAGGGGGGGAAAAAAATAAGGGGGGGAGGAAAAAAAAAAACCGCCCCCC	GGGGGGGAAAAAAATAAGGGGGGGAGGAAAAAAAAAAACCGCCCCCC	Q4I557	Q4I557_GIBZE	Hypothetical protein	305	48.5 (114)	0.0006	1	NA	NA	NA	NA	NA	NA	NA	NA	NA	NA	NA	NA	NA	NA	NA	NA	NA	NA	1	UU	NA
5	14	4	8200000000000	SMAA43846	TTTGAAGTGCAATCCAATCAGCGAGAACACCAGCCATGTACGTCGGCATC	TTTGAAGTGCAATCCAATCAGCGAGAACACCAGCCATGTACGTCGGCATC	Q4SMI4	Q4SMI4_TETNG	Chromosome 18 SCAF14547, whole genome shotgun sequence	383	82.0 (201)	5e-15	2	NA	NA	NA	NA	NA	NA	NA	NA	NA	NA	NA	NA	NA	NA	NA	NA	NA	NA	5e-15	SU	NA
5	15	4	82I11	SMLA13G11	GCCCCCCCCCCCGCAACAAATTTTTTTTTTTTTTTTTTTTTTTTTTTTTT	GCCCCCCCCCCCGCAACAAATTTTTTTTTTTTTTTTTTTTTTTTTTTTTT	-	-	-	-	-	-	-	NA	NA	NA	NA	NA	NA	NA	NA	NA	NA	NA	NA	NA	NA	NA	NA	NA	NA	1	UU	NA
5	24	16	43A23	CD141637	CAACAGAGATAACCTGGATAAACTCATGACCAAACTTTCTCTGCTTAAGT	CAACAGAGATAACCTGGATAAACTCATGACCAAACTTTCTCTGCTTAAGT	Q5C7A9	Q5C7A9_SCHJA	SJCHGC01113 protein (Fragment)	152	47.4 (111)	0.0001	1	Smp_095250	hypothetical protein	NA	NA	-	1	shisto10794g09.p1k, shisto2971f04.p1k, shisto5448f02.p1k, shisto9579h10.p1k	-, +	4	NA	NA	NA	NA	NA	NA	NA	NA	NA	1	UA	NA
5	19	23	19I23	SCMESSA	no data	CTTTACTTTGAACATGGATAACTGTAGTAATTCTAGAGCTAATACATGCC	SCMESSA	-	S.MANSONI 18S RRNA GENE, COMPLETE SEQUENCE	S.MANSONI 18S RRNA GENE, COMPLETE SEQUENCE	-	OM0023376-AOP	-	NA	NA	NA	NA	NA	NA	NA	NA	NA	NA	NA	NA	NA	NA	NA	NA	NA	NA	1	UU	NA
5	6	24	14M23	Contig5525	no data	TAGTTAGCATGCCAAAGTCTCGTTCGGTATCGGAATTAACCAGACGAATC	Contig5525	-	UNKNOWN 3252	UNKNOWN 3252	-	OM0023367-AOP	-	NA	NA	NA	NA	NA	NA	NA	NA	NA	NA	NA	NA	NA	NA	NA	NA	NA	NA	1	UU	NA
5	21	24	1.6e+24	Contig6197	no data	TGGTTTTTTACCTACAAACTGATGACAAATCATCTTCATTTTATGGCGTG	Contig6197	-	UNKNOWN 3724	UNKNOWN 3724	-	OM0023346-AOP	-	NA	NA	NA	NA	NA	NA	NA	NA	NA	NA	NA	NA	NA	NA	NA	NA	NA	NA	1	UU	NA
5	26	27	7I11	Contig302	no data	CGTATTAAGGACCTTCGTGATAAGTACAAGATGCGTGTTATCAAGGTGT	Contig302	-	SIMILAR TO HNRPK PROTEIN (5E-31)	SIMILAR TO HNRPK PROTEIN (5E-31)	-	OM0023395-AOP	-	Smp_005860.1, Smp_005860.2, Smp_005860.3, Smp_005860.4, Smp_005860.5, Smp_120960.3, Smp_120960.1, Smp_120960.2, Smp_162320, Smp_156670	NA	NA	NA	+	10	shisto3363f07.q1k	+	1	NA	NA	NA	NA	NA	NA	NA	NA	NA	1	US	NA
5	23	28	3I23	Contig1575	no data	TCTGTAAGAAAAAAGCTTCATTTAATACTTCCAGCTGGTCGGTATTTC	Contig1575	-	SIMILAR TO 14-3-3 EPSILON 2 (1E-139)	SIMILAR TO 14-3-3 EPSILON 2 (1E-139)	-	OM0023335-AOP	-	NA	NA	NA	NA	NA	NA	NA	NA	NA	NA	NA	NA	NA	NA	NA	NA	NA	NA	1	UU	NA
6	6	2	87J23	SMLC18G01	CCCCCCCCCCCCCGTTGTTTTTTTTTTTTTTTTTTTTTTTTTTTAAAAAA	CCCCCCCCCCCCCGTTGTTTTTTTTTTTTTTTTTTTTTTTTTTTAAAAAA	-	-	-	-	-	-	-	NA	NA	NA	NA	NA	NA	NA	NA	NA	NA	NA	NA	NA	NA	NA	NA	NA	NA	1	UU	NA
6	25	13	53J23	CD190435	TGATGCACGAATATATCGGAAGAGGTATCAGAACGAGTAATGAAGCCATA	TGATGCACGAATATATCGGAAGAGGTATCAGAACGAGTAATGAAGCCATA	Q5DE71	Q5DE71_SCHJA	SJCHGC05173 protein	175	139 (351)	2e-32	-2	Smp_097750	cold shock domain protein A, putative	NA	NA	-	1	shisto7882e09.p1k, shisto10124c02.p1k, shisto10558f07.q1k, shisto2772h08.q1k, shisto2792c12.q1k, shisto4451a11.q1k, shisto4540h11.p1k, shisto8742c12.q1k, shisto10240g01.p1k, shisto10245c01.p1k, shisto10818a07.q1k, shisto12627d07.q1k, shisto2513f09.p1k, shisto3798a11.p1k, shisto5767f11.q1k, shisto8947h12.q1k, shisto8993e06.q1k, shisto1054h09.p1k, shisto11344h11.q1k, shisto12299g12.p1k, shisto12546…
6	10	17	38F23	CD124652	TTTAGATACAAAAAATGGACCCGCTTGTTGTCACCCGCCGCCGCCATTTG	TTTAGATACAAAAAATGGACCCGCTTGTTGTCACCCGCCGCCGCCATTTG	Q64N57	Q64N57_BACFR	Transcriptional regulator	75	57.0 (136)	2e-07	-1	NA	NA	NA	NA	NA	NA	NA	NA	NA	NA	NA	NA	NA	NA	NA	NA	NA	NA	1	UU	NA
6	8	23	18B23	Contig902	no data	CTATCACGGGATTATACAAAAAGTTGACGGGTAAAGACGTCCAGATC	Contig902	-	SIMILAR TO RIBOSOMAL PROTEIN S7 (9E-53)	SIMILAR TO RIBOSOMAL PROTEIN S7 (9E-53)	-	OM0023378-AOP	-	Smp_021140	putative ribosomal protein S7	200	NA	+	1	shisto10398a11.q1k, shisto12678d10.p1k, shisto3525e03.q1k, shisto431h08.p1k, shisto5287h06.q1k	-, +	5	PF01251	Ribosomal_S7e	IPR000554	Ribosomal protein S7e	Molecular Function: structural constituent of ribosome (GO:0003735), Cellular Component: intracellular (GO:0005622), Cellular Component: ribosome (GO:0005840), Biological Process: translation (GO:0006412)	NA	NA	NA	NA	1	US	NA
6	13	23	19B11	SMU54584	no data	CGAAAAAAGTTGCACGTCCTAAGACTTCAAAACCAAAAACTACTCCAAAG	SMU54584	-	SCHISTOSOMA MANSONI HISTONE H1 MRNA, PARTIAL CDS	SCHISTOSOMA MANSONI HISTONE H1 MRNA, PARTIAL CDS	-	OM0023337-AOP	-	Smp_003770	histone h1/h5, putative	193	193	+	1	shisto10967e12.q1k, shisto5089d01.q1k, shisto8341g09.q1k	-	3	PF00538	Linker_histone	IPR005818	Histone H1/H5	Cellular Component: nucleosome (GO:0000786), Molecular Function: DNA binding (GO:0003677), Cellular Component: nucleus (GO:0005634), Biological Process: nucleosome assembly (GO:0006334)	SM00526	IPR005818	Histone H1/H5	Cellular Component: nucleosome (GO:0000786), Molecular Function: DNA binding (GO:0003677), Cellular Component: nucleus (GO:0005634), Biological Process: nucleosome assembly (GO:0006334)	1	US	NA
6	3	28	1J11	Contig1136	no data	GGTCCGTGTAGAGTTTCTGGATGATACTAATAGGTCAATCATAAGAAACG	Contig1136	-	SIMILAR TO 40S RIBOSOMAL PROTEIN S28 (7E-16)	SIMILAR TO 40S RIBOSOMAL PROTEIN S28 (7E-16)	-	OM0023401-AOP	-	Smp_026100	40S ribosomal protein S28, putative	68	NA	+	1	shisto3855d05.p1k, shisto3647a07.p1k, shisto3647e07.p1k	-	3	PF01200	Ribosomal_S28e	IPR000289	Ribosomal protein S28e	Molecular Function: structural constituent of ribosome (GO:0003735), Cellular Component: intracellular (GO:0005622), Cellular Component: ribosome (GO:0005840), Biological Process: translation (GO:0006412)	NA	NA	NA	NA	1	US	NA
6	9	28	2B11	Contig1439	no data	TTTGCGAAAAGGAGAAGAATCGTTGGCTTAATTTCAGCAAGAAAATGATC	Contig1439	-	SIMILAR TO CG17454 PROTEIN Q9W5L3 (2E-06)	SIMILAR TO CG17454 PROTEIN Q9W5L3 (2E-06)	-	OM0023375-AOP	-	Smp_064830	survival motor neuron protein, putative	NA	212	+	1	shisto1740b01.p1k, shisto2836c11.q1k, shisto3850a01.q1k, shisto4274b03.p1k	-, +	4	NA	NA	NA	NA	NA	SM00333	IPR002999	Tudor	Molecular Function: nucleic acid binding (GO:0003676)	1	US	NA
6	16	28	2N23	Contig151	no data	TTTAAATTTGAGGCTTATTTTTTATTAGTGCCAGGTATTCGTTTTCGACT	Contig151	-	UNKNOWN 92	UNKNOWN 92	CG32701-PA [Drosophila melanogaster]	OM0023375-AOP	-	Smp_071600.2, Smp_071600.1, Smp_045200, Smp_000260, Smp_020760.2, Smp_020760.1	NA	NA	NA	-, +	6	shisto11925b01.p1k, shisto4067b12.p1k, shisto11784g07.p1k, shisto12382g01.p1k, shisto12741c01.q1k, shisto12930f02.p1k, shisto1777g04.q1k, shisto9474f10.q1k, shisto9686g03.q1k, shisto9884d06.p1k, shisto10073f04.p1k, shisto10164c11.p1k, shisto10227a01.p1k, shisto10314d01.p1k, shisto10323g05.p1k, shisto10328b03.q1k, shisto10556e02.p1k, shisto10614h09.q1k, shisto10628b01.p1k, shisto10742g03.p1k, shis…	-, +	203	NA	NA	NA	NA	NA	NA	NA	NA	NA	1	UU	NA
6	19	28	3J11	Contig1833	no data	TCAGATGGTCCCTGTGAAGATGATCTATTTGCCTGGCAAGCCACTATTAT	Contig1833	-	SIMILAR TO UBIQUITIN-CONJUGATING ENZYME E2 (EC 6.3.2.19) 2E-18	SIMILAR TO UBIQUITIN-CONJUGATING ENZYME E2 (EC 6.3.2.19) 2E-18	-	OM0023327-AOP	-	Smp_067990.4, Smp_067980.4, Smp_068000	NA	NA	NA	+	3	shisto2393e02.p1k, shisto3455h03.p1k, shisto3666e12.q1k	-	3	NA	NA	NA	NA	NA	NA	NA	NA	NA	1	US	NA
7	26	5	80K11	CONTIG9210	TGAGTTGAAACGTAGACATGCATATATAGATGCTGACAGAATACGTGACA	TGAGTTGAAACGTAGACATGCATATATAGATGCTGACAGAATACGTGACA	Q8N8I2	Q8N8I2_HUMAN	Hypothetical protein FLJ39450	268	43.1 (100)	0.003	-1	NA	NA	NA	NA	NA	NA	NA	NA	NA	NA	NA	NA	NA	NA	NA	NA	NA	NA	1	UU	NA
7	8	24	15G11	Contig584	no data	TCAATGGAGTGTATTACCTGATTTGTTTCTTTATCGTGATCCAAACGAGG	Contig584	-	SIMILAR TO 40S RIBOSOMAL PROTEIN SA (P40) (34/67 KDA LAMININ BINDING PROTEIN) 6E	SIMILAR TO 40S RIBOSOMAL PROTEIN SA (P40) (34/67 KDA LAMININ BINDING PROTEIN) 6E	-	OM0023352-AOP	-	Smp_081960, Smp_179180, Smp_179790, Smp_016780, Smp_157020, Smp_006920, Smp_171020, Smp_123060	NA	NA	NA	-, +	8	shisto10810f03.p1k, shisto1225e08.p1k, shisto4787d02.q1k, shisto8755e09.q1k	-, +	4	NA	NA	NA	NA	NA	NA	NA	NA	NA	1	UU	NA
7	17	24	16K11	Contig6241	no data	TTCGCCCTATAGTGAGTCGTATTACAATTCACTGGCCGACGATACAAC	Contig6241	-	UNKNOWN 3762	UNKNOWN 3762	-	OM0023346-AOP	-	NA	NA	NA	NA	NA	NA	NA	NA	NA	NA	NA	NA	NA	NA	NA	NA	NA	NA	1	UU	NA
7	25	24	17G11	Contig6669	no data	GGAATTCGGCACGAGGGAGGAGGAAAATTTATAGGTTTTGATAATAAATT	Contig6669	-	UNKNOWN 4116	UNKNOWN 4116	hypothetical	OM0023373-AOP	-	Smp_089730	hypothetical protein	NA	NA	-	1	shisto12140e05.p1k, shisto5335e09.q1k	-	2	NA	NA	NA	NA	NA	NA	NA	NA	NA	1	UA	NA
7	4	28	1O11	AF153977	no data	CAAAACGTGTTAAACTATTGAGCTACCAAGCTTTAACTTGTCTCCGATTC	AF153977	-	SCHISTOSOMA MANSONI EUKARYOTIC TRANSLATION INITIATION FACTOR 5 (EIF-5) MRNA, PAR	SCHISTOSOMA MANSONI EUKARYOTIC TRANSLATION INITIATION FACTOR 5 (EIF-5) MRNA, PAR	-	OM0023326-AOP	-	NA	NA	NA	NA	NA	NA	NA	NA	NA	NA	NA	NA	NA	NA	NA	NA	NA	NA	1	UU	NA
7	17	28	3C11	Contig1537	no data	GGTCCTAAAGTCAAGAAAAATCCATTGAAGAACCTACAGGCGTTGCTAA	Contig1537	-	SIMILAR TO 60S RIBOSOMAL PROTEIN L4 (1E-109) POSSIBLE ANTISENSE	SIMILAR TO 60S RIBOSOMAL PROTEIN L4 (1E-109) POSSIBLE ANTISENSE	-	OM0023335-AOP	-	Smp_153790	60S ribosomal protein L4, putative	NA	NA	+	1	shisto4700h04.p1k, shisto584d07.q1k, shisto7652f05.q1k	-, +	3	NA	NA	NA	NA	NA	NA	NA	NA	NA	1	US	NA
8	13	23	19D11	SMU65657	no data	TTTGCCGCTCGACTGATGCTGAGAAGATGACCTAATTTGACTATTTAGAG	SMU65657	-	SCHISTOSOMA MANSONI 18S RIBOSOMAL RNA GENE, COMPLETE SEQUENCE	SCHISTOSOMA MANSONI 18S RIBOSOMAL RNA GENE, COMPLETE SEQUENCE	-	OM0023337-AOP	-	NA	NA	NA	NA	NA	NA	NA	NA	NA	NA	NA	NA	NA	NA	NA	NA	NA	NA	1	UU	NA
8	2	28	1H11	Contig1125	no data	TAATATCAAAGTTGCGAAAGTCAACACGCTTAATTGCCCTAACAATGTT	Contig1125	-	SIMILAR TO RIBOSOMAL PROTEIN L23A 1E-36	SIMILAR TO RIBOSOMAL PROTEIN L23A 1E-36	-	OM0023401-AOP	-	Smp_003410	60S ribosomal protein L23a, putative	197	NA	+	1	shisto7018g10.p1k	+	1	PF00276	Ribosomal_L23	IPR013025	Ribosomal protein L25/L23	-	NA	NA	NA	NA	1	US	NA
8	5	28	1D23	Contig1109	no data	GGCTAAGCAATCTTAGGTAATCATAGTAAATAGGTGGCTAAACAAGGGTT	Contig1109	-	SIMILAR TO CYTOSCHROME C OXIDASE POLYPEPTIDE I (1E-128) POSSIBLE ANTISENSE	SIMILAR TO CYTOSCHROME C OXIDASE POLYPEPTIDE I (1E-128) POSSIBLE ANTISENSE	-	OM0023401-AOP	-	NA	NA	NA	NA	NA	NA	NA	NA	NA	NA	NA	NA	NA	NA	NA	NA	NA	NA	1	UU	NA
8	19	28	3L11	Contig1845	no data	GGGATCAAGGAGGAGAAATACGGAAAGGGTGTTGTAGTCATCACAAAGAA	Contig1845	-	SIMILAR TO RIBOSOMAL PROTEIN L28 (1E-14)	SIMILAR TO RIBOSOMAL PROTEIN L28 (1E-14)	-	OM0023327-AOP	-	Smp_084460	60S ribosomal protein L28, putative	134	NA	+	1	shisto1949c11.q1k, shisto864e03.p1k, shisto8775a06.p1k	-, +	3	PF01778	Ribosomal_L28e	IPR002672	Ribosomal protein L28e	Molecular Function: structural constituent of ribosome (GO:0003735), Cellular Component: intracellular (GO:0005622), Cellular Component: ribosome (GO:0005840), Biological Process: translation (GO:0006412)	NA	NA	NA	NA	1	US	NA
9	16	16	42A22	CD137602	TACTTTCAATTTGTTCGCTATTGACGGACCCTAATCCAGATGATCCTCTA	TACTTTCAATTTGTTCGCTATTGACGGACCCTAATCCAGATGATCCTCTA	Q5DHA7	Q5DHA7_SCHJA	SJCHGC00720 protein	147	123 (308)	2e-27	-1	Smp_067990.3, Smp_067990.2, Smp_067990.4, Smp_067990.1, Smp_067980.5, Smp_067980.1, Smp_067980.2, Smp_067980.3, Smp_067980.4, Smp_068000	NA	NA	NA	+	10	shisto12321f02.q1k, shisto5531a01.p1k, shisto890g12.q1k	-, +	3	NA	NA	NA	NA	NA	NA	NA	NA	NA	2e-27	AS	NA
9	27	23	2e+23	Contig6738	no data	GATGGGACTTGCACACAGACACAGACATAGACACACACACACACACACAC	Contig6738	-	UNKNOWN 4178	UNKNOWN 4178	-	OM0011068-NOP	-	NA	NA	NA	NA	NA	NA	NA	NA	NA	NA	NA	NA	NA	NA	NA	NA	NA	NA	1	UU	NA
9	28	23	20I22	Contig6911	no data	CACATCGCAAATCCTCAGGTGGTAGAAAGATCTGCGGAGCTGATCCCAA	Contig6911	-	UNKNOWN 4326	UNKNOWN 4326	-	OM0011068-NOP	-	NA	NA	NA	NA	NA	NA	NA	NA	NA	NA	NA	NA	NA	NA	NA	NA	NA	NA	1	UU	NA
9	19	25	13A10	Contig5191	no data	TTAAAAATGCTGATATGTCTGATGATATGCAACAATGGCGCAGTGGGATA	Contig5191	-	UNKNOWN 3036	UNKNOWN 3036	dynein light chain 2; RIKEN cDNA 1700064A15 gene [Mus musculus]	OM0023332-AOP	-	NA	NA	NA	NA	NA	NA	NA	NA	NA	NA	NA	NA	NA	NA	NA	NA	NA	NA	1	UU	NA
9	7	28	1I22	AF503487.1	no data	GGATAATTCGCACCTATCGTATGCTACGTTAATCACTTGATCTTGTCTCT	AF503487.1	-	SCHISTOSOMA MANSONI INTERNAL TRANSCRIBED SPACER 2, PARTIAL SEQUENCE	SCHISTOSOMA MANSONI INTERNAL TRANSCRIBED SPACER 2, PARTIAL SEQUENCE	-	OM0023389-AOP	-	NA	NA	NA	NA	NA	NA	NA	NA	NA	NA	NA	NA	NA	NA	NA	NA	NA	NA	1	UU	NA
9	13	28	2A22	Contig1270	no data	GTAACGCTACTAAAGAAGAATTGGCAAAACGTCAGATGTTTGTACATCAA	Contig1270	-	SIMILAR TO RIBOSOMAL PROTEIN L10A (2E-70)	SIMILAR TO RIBOSOMAL PROTEIN L10A (2E-70)	-	OM0023353-AOP	-	Smp_042090.2, Smp_042090.3, Smp_042090.1	NA	NA	NA	+	3	shisto11795a12.p1k, shisto12045b08.q1k, shisto2711a11.q1k, shisto3925f02.p1k	-, +	4	NA	NA	NA	NA	NA	NA	NA	NA	NA	1	US	NA
9	19	28	3I10	Contig1655	no data	CGCCGTTTGTAATAACTCACGTGTCGAATACAATATGGTTTGACTTGATT	Contig1655	-	SIMILAR TO 40S RIBOSOMAL PROTEIN S14 (7E-51)	SIMILAR TO 40S RIBOSOMAL PROTEIN S14 (7E-51)	-	OM0023385-AOP	-	NA	NA	NA	NA	NA	NA	NA	NA	NA	NA	NA	NA	NA	NA	NA	NA	NA	NA	1	UU	NA
9	20	28	3M10	Contig1677	no data	TTTACCACTGGATAGTTTGCAGTTATACAACTGTGGATCATTAATTAGTG	Contig1677	-	SIMILAR TO RIBOSOMAL PROTEIN S30	SIMILAR TO RIBOSOMAL PROTEIN S30	-	OM0023385-AOP	-	Smp_014650	40S ribosomal protein S30, putative	135	NA	+	1	shisto846f02.p1k, shisto9427b09.p1k	-, +	2	PF04758	Ribosomal_S30	IPR006846	Ribosomal protein S30	Molecular Function: structural constituent of ribosome (GO:0003735), Cellular Component: intracellular (GO:0005622), Cellular Component: ribosome (GO:0005840), Biological Process: translation (GO:0006412)	NA	NA	NA	NA	1	US	NA
10	27	4	83J22	SMLA27H02	CGGACACAAATCCTACAGATACCTTCACACATTTGTTTACCACATATACT	CGGACACAAATCCTACAGATACCTTCACACATTTGTTTACCACATATACT	Q5CVD5	Q5CVD5_CRYPV	Hypothetical protein	546	49.7 (117)	0.0002	3	NA	NA	NA	NA	NA	NA	NA	NA	NA	NA	NA	NA	NA	NA	NA	NA	NA	NA	1	UU	NA
10	28	9	67N10	CONTIG2824	TACAAGAGCAAAACTTCTTGGCATGATCCAGAGAATCGTATACAAGAGCA	TACAAGAGCAAAACTTCTTGGCATGATCCAGAGAATCGTATACAAGAGCA	Q5DDM8	Q5DDM8_SCHJA	SJCHGC09286 protein	129	171 (432)	1e-41	1	Smp_091640	40S ribosomal protein S24, putative	129	NA	-	1	shisto5693e04.q1k, shisto12373b07.q1k, shisto3487d10.q1k, shisto3579b03.q1k, shisto9833a10.q1k	-, +	5	PF01282	Ribosomal_S24e	IPR001976	Ribosomal protein S24e	Molecular Function: structural constituent of ribosome (GO:0003735), Cellular Component: intracellular (GO:0005622), Cellular Component: ribosome (GO:0005840), Biological Process: translation (GO:0006412)	NA	NA	NA	NA	1e-41	SA	NA
10	7	22	21B22	AA825102	AGTGAATTGTAATACGACTCACTATAGGGATCGAATTGGGTACCAGGCCC	GTGAATTGTAATACGACTCACTATAGGGATCGAATTGGGTACCAGGCCC	O53022	O53022_9ZZZZ	Fused-ccdB protein	217	46.2 (108)	0.0003	1	NA	NA	NA	NA	NA	NA	NA	NA	NA	NA	NA	NA	NA	NA	NA	NA	NA	NA	1	UU	NA
10	13	23	19B10	SMA419780	no data	TAAGTCGTAACATGGTAGTGCTTGAAGAATCAGGCGCTAGAATTAGACTG	SMA419780	-	SCHISTOSOMA MANSONI MITOCHONDRION PARTIAL 12S RRNA GENE, ISOLATE NHM 2798	SCHISTOSOMA MANSONI MITOCHONDRION PARTIAL 12S RRNA GENE, ISOLATE NHM 2798	-	OM0023338-AOP	-	NA	NA	NA	NA	NA	NA	NA	NA	NA	NA	NA	NA	NA	NA	NA	NA	NA	NA	1	UU	NA
10	19	24	16B22	Contig645	no data	GATTTTTGTGCCTGTAAAGCATGCAATTCATTGTACTCCTCCAATCT	Contig645	-	SIMILAR TO CABP (1E-12)	SIMILAR TO CABP (1E-12)	-	OM0023371-AOP	-	Smp_015980, Smp_135690, Smp_035500, Smp_136800, Smp_099770, Smp_129960	NA	NA	NA	-, +	6	shisto10007c08.q1k, shisto10007h09.q1k, shisto3249g07.q1k, shisto4014h01.p1k, shisto8957f11.q1k	-, +	5	NA	NA	NA	NA	NA	NA	NA	NA	NA	1	UU	NA
10	1	27	4B22	Contig2058	no data	TATGGTTGCAAAGCTGAAACTTAAAGGAATTTCGACGGCGCACTGTTCGT	Contig2058	-	UNKNOWN 996	UNKNOWN 996	-	OM0023330-AOP	-	NA	NA	NA	NA	NA	NA	NA	NA	NA	NA	NA	NA	NA	NA	NA	NA	NA	NA	1	UU	NA
10	13	27	5N22	Contig251	no data	GAACTCGGAGGAGGTTATTGATTATACAGGTGATAGATCATTTGAAGCCC	Contig251	-	PROTEIN DISULFIDE ISOMERASE HOMOLOGUE PRECURSOR	PROTEIN DISULFIDE ISOMERASE HOMOLOGUE PRECURSOR	-	OM0023340-AOP	-	Smp_056760, Smp_004940, Smp_080180, Smp_004000	NA	NA	NA	+	4	shisto10121a07.p1k, shisto10121b07.p1k, shisto10651b04.p1k, shisto12901d04.q1k, shisto5138e09.p1k, shisto6506f03.p1k	-, +	6	NA	NA	NA	NA	NA	NA	NA	NA	NA	1	US	NA
10	10	28	2F10	Contig1373	no data	GTTTCCCAATTGTATGCAATTCACTTTTTTACATTTAACGGTTGTGTACT	Contig1373	-	UNKNOWN 666 POSSIBLE UNKNOWN	UNKNOWN 666 POSSIBLE UNKNOWN	Similar to ribophorin II [Xenopus laevis]	OM0023384-AOP	-	NA	NA	NA	NA	NA	NA	NA	NA	NA	NA	NA	NA	NA	NA	NA	NA	NA	NA	1	UU	NA
10	12	28	2N10	Contig1416	no data	GCACAATATCAGTCCTCAAATGACGATTTATGTTCTAAGAAAGCTGAT	Contig1416	-	SIMILAR TO DOLICHYL-DIPHOSPHOOLIGOSACCHARIDE-PROTEIN GLYCOSYLTRANSFERASE 67 KDA	SIMILAR TO DOLICHYL-DIPHOSPHOOLIGOSACCHARIDE-PROTEIN GLYCOSYLTRANSFERASE 67 KDA	-	OM0023384-AOP	-	Smp_105680.2, Smp_105680.1	NA	NA	NA	+	2	shisto11321a04.p1k, shisto3660d08.q1k, shisto9988e07.p1k	-, +	3	NA	NA	NA	NA	NA	NA	NA	NA	NA	1	US	NA
10	15	28	2J22	Contig140	no data	CAGCGGTTGTGCACAAATGTGTTGTTATTTAATAAATCTGAGCACAATGG	Contig140	-	SIMILAR TO MAP-LC3 (7E-14) AND HYPOTHETICAL 18.8 KDA PROTEIN (SYMBIOSIS-RELATED	SIMILAR TO MAP-LC3 (7E-14) AND HYPOTHETICAL 18.8 KDA PROTEIN (SYMBIOSIS-RELATED	-	OM0023384-AOP	-	NA	NA	NA	NA	NA	NA	NA	NA	NA	NA	NA	NA	NA	NA	NA	NA	NA	NA	1	UU	NA
10	16	28	2N22	Contig1421	no data	GCGGGCATGAAGAAAGAAGATATTGATGAAATTATTCTAGTTGGTGGTTC	Contig1421	-	HSP70 (0.0)	HSP70 (0.0)	-	OM0023384-AOP	-	Smp_049550	heat shock protein 70 (hsp70), putative	648	NA	+	1	shisto12477b05.p1k, shisto1393a01.q1k, shisto2970f09.q1k, shisto3673b12.p1k	-, +	4	PF00012	HSP70	IPR013126	Heat shock protein 70	-	NA	NA	NA	NA	1	US	NA
10	17	28	3B10	Contig1699	no data	TATGTTCTTCATCACTCTCATATCCCTGTAGTCATCGTCCCACCTCAAGA	Contig1699	-	SIMILAR TO UNIVERSAL STRESS PROTEIN USP1 (3E-09)	SIMILAR TO UNIVERSAL STRESS PROTEIN USP1 (3E-09)	-	OM0023329-AOP	-	Smp_043120	universal stress protein, putative	160	NA	+	1	shisto12579b08.q1k, shisto1618f09.p1k, shisto2731f01.q1k, shisto4965d08.q1k	-	4	PF00582	Usp	IPR006016	UspA	Biological Process: response to stress (GO:0006950)	NA	NA	NA	NA	1	US	NA
10	22	28	3F22	Contig1727	no data	TGCAAGTGGAAATTATGCTACTGTTGTCGCTCACAATCCCGACACTAAAC	Contig1727	-	SIMILAR TO RIBOSOMAL PROTEIN L8 (1E-113) POSSIBLE ANTISENSE	SIMILAR TO RIBOSOMAL PROTEIN L8 (1E-113) POSSIBLE ANTISENSE	-	OM0023329-AOP	-	Smp_051260	60S ribosomal protein L8, putative	259	NA	+	1	shisto8757a06.p1k	-	1	PF00181; PF03947	Ribosomal_L2; Ribosomal_L2_C	IPR002171	Ribosomal protein L2	Molecular Function: structural constituent of ribosome (GO:0003735), Cellular Component: intracellular (GO:0005622), Cellular Component: ribosome (GO:0005840), Biological Process: translation (GO:0006412)	NA	NA	NA	NA	1	US	NA
11	10	7	72C10	CONTIG4985	TTAGGTTCCAACACACCACTATTACTACCACCACCACCTCCACCAACACC	TTAGGTTCCAACACACCACTATTACTACCACCACCACCTCCACCAACACC	Q5BVS4	Q5BVS4_SCHJA	SJCHGC06736 protein (Fragment)	178	223 (569)	6e-57	1	Smp_142360.2, Smp_142360.1	NA	NA	NA	-	2	shisto3967h04.p1k, shisto2916f09.p1k, shisto5480a07.q1k, shisto5480e07.q1k	-, +	4	NA	NA	NA	NA	NA	NA	NA	NA	NA	6e-57	SA	NA
11	16	23	19O10	SM28SGAP	no data	TTGTCCGTTCGCGGGCTTTGTTCAGTAATCTGCAAAGTACTGTTGCATT	SM28SGAP	-	SCHISTOSOMA MANSONI 28S RRNA GENE GAP REGION	SCHISTOSOMA MANSONI 28S RRNA GENE GAP REGION	-	OM0023390-AOP	-	Smp_182670	hypothetical protein	NA	NA	-	1	shisto5774f12.p1k, shisto5774f12.p1ka	-	2	NA	NA	NA	NA	NA	NA	NA	NA	NA	1	UA	NA
11	17	23	19C22	SCMRRNAE	no data	CATTATTAGACGGAAAGACCCCAAGAGCTTTTTTTGTGTTAGATTTGTTT	SCMRRNAE	-	SCHISTOSOMA MANSONI RIBOSOMAL RNA	SCHISTOSOMA MANSONI RIBOSOMAL RNA	-	OM0023390-AOP	-	NA	NA	NA	NA	NA	NA	NA	NA	NA	NA	NA	NA	NA	NA	NA	NA	NA	NA	1	UU	NA
11	5	24	14K22	Contig5603	no data	TAAACAGCGTAAGAAGGAGGGTAAAGACCCATTGCCTGGTATAAGGA	Contig5603	-	UNKNOWN 3304	UNKNOWN 3304	ribosomal protein L6 [Mus musculus]	OM0023347-AOP	-	Smp_038510.2, Smp_038510.1	NA	NA	NA	+	2	shisto11364h08.p1k, shisto11473c07.q1k	+	2	NA	NA	NA	NA	NA	NA	NA	NA	NA	1	US	NA
11	10	24	15O10	Contig5970	no data	TGGATTGTGTCTCCAACGCAAATGAAATACCACTGCTATCATTGTTGCTA	Contig5970	-	UNKNOWN 3554	UNKNOWN 3554	putative senescence-associated protein [Pisum sativum]	OM0023348-AOP	-	NA	NA	NA	NA	NA	NA	NA	NA	NA	NA	NA	NA	NA	NA	NA	NA	NA	NA	1	UU	NA
11	5	28	1C22	AF310263.1	no data	CCGTTGTATCCCAATCTTAAAATCGCTGGAATCCAAAAACGAAGATCAAC	AF310263.1	-	SCHISTOSOMA MANSONI HEAT SHOCK PROTEIN HSP60 MRNA, PARTIAL CDS	SCHISTOSOMA MANSONI HEAT SHOCK PROTEIN HSP60 MRNA, PARTIAL CDS	-	OM0023389-AOP	-	Smp_008545	heat shock protein HSP60, putative	NA	NA	+	1	shisto1027b05.p1k, shisto10645e03.p1k, shisto11993c02.q1k, shisto3250a02.p1k, shisto3320c09.q1k, shisto3320g09.q1k, shisto3859f11.q1k, shisto9921d10.p1k, shisto5557d09.q1k	-, +	9	NA	NA	NA	NA	NA	NA	NA	NA	NA	1	US	NA
11	14	28	2G22	Contig1302	no data	TTTGTCTCTAATGACCGATTACTCGTTCAAAGAGGCCGAACAGATTAAAG	Contig1302	-	SIMILAR TO 60S ACIDIC RIBOSOMAL PROTEIN PO (1E-100)	SIMILAR TO 60S ACIDIC RIBOSOMAL PROTEIN PO (1E-100)	-	OM0023353-AOP	-	Smp_009690.1, Smp_009690.2	NA	NA	NA	+	2	shisto4214g02.p1k	-	1	NA	NA	NA	NA	NA	NA	NA	NA	NA	1	US	NA
11	25	28	4C10	Contig1977	no data	TTGAGATCGTGTTTTTGTGCTGCAATGACAGAGAAGAAAGCAGATGTCCC	Contig1977	-	SIMILAR TO 40S RRNA PROTEIN HOMOLOG (5R-55) POSSIBLE ANTISENSE	SIMILAR TO 40S RRNA PROTEIN HOMOLOG (5R-55) POSSIBLE ANTISENSE	-	OM0023386-AOP	-	NA	NA	NA	NA	NA	NA	NA	NA	NA	NA	NA	NA	NA	NA	NA	NA	NA	NA	1	UU	NA
12	3	19	31H10	CD089870	GTGGCATAGACGTGATGAACGATTGGGGAGGATTATATTTGAGCTATTCA	GTGGCATAGACGTGATGAACGATTGGGGAGGATTATATTTGAGCTATTCA	Q26565	CYPH_SCHMA	Peptidyl-prolyl cis-trans isomerase (EC 5.2.1.8) (PPIase) (Rotamase) (Cyclophili	161	107 (267)	1e-22	1	Smp_040130.1, Smp_040130.2	NA	NA	NA	+	2	shisto10049c09.q1k, shisto7334f12.q1k	-, +	2	NA	NA	NA	NA	NA	NA	NA	NA	NA	1e-22	SS	NA
12	3	23	17P22	Contig69	no data	GGTTTTGCTCAAAGATTATCTACTTGTACAGGAAAGTAACGACGAAAGCA	Contig69	-	14-3-3 PROTEIN HOMOLOG 1 (EXPECT = 3E-18)	14-3-3 PROTEIN HOMOLOG 1 (EXPECT = 3E-18)	-	OM0023381-AOP	-	Smp_009780.2, Smp_009780.1, Smp_066830, Smp_165540, Smp_076500, Smp_172190.2, Smp_172190.1, Smp_131020, Smp_077860, Smp_185950, Smp_190960, Smp_190950, Smp_193540.1, Smp_193540.2, Smp_154010.1, Smp_154010.2, Smp_154020, Smp_186200, Smp_184410, Smp_117350, Smp_143470.1, Smp_143470.2, Smp_166050, Smp_005160, Smp_127500, Smp_174960, Smp_019280, Smp_179040, Smp_135280, Smp_058650, Smp_172420	NA	NA	NA	-, +	31	shisto12678e06.p1k, shisto1034f07.p1k, shisto10483f01.q1k, shisto10613e07.p1k, shisto10718a03.q1k, shisto10771d01.q1k, shisto10823c08.q1k, shisto10916h02.p1k, shisto1104f05.p1k, shisto11065c02.p1k, shisto11127d08.p1k, shisto11288b10.p1k, shisto11293d03.p1k, shisto11320g11.q1k, shisto11642d11.q1k, shisto11651h03.q1k, shisto11668d09.p1k, shisto11683d10.p1k, shisto11740c10.p1k, shisto11913f04.p1k, s…	-, +	102	NA	NA	NA	NA	NA	NA	NA	NA	NA	1	UU	NA
12	19	23	19L22	SMU22162	no data	TGGCTTTATCTGCATCTGCTTTAGATATACTGTTTCATGATACTTGGTTT	SMU22162	-	SCHISTOSOMA MANSONI CYTOCHROME C OXIDASE SUBUNIT 1 GENE, MITOCHONDRIAL GENE ENCO	SCHISTOSOMA MANSONI CYTOCHROME C OXIDASE SUBUNIT 1 GENE, MITOCHONDRIAL GENE ENCO	-	OM0023338-AOP	-	NA	NA	NA	NA	NA	NA	NA	NA	NA	NA	NA	NA	NA	NA	NA	NA	NA	NA	1	UU	NA
12	24	24	17D10	Contig6825	no data	GATGCAATTAACCGACAAGTCAAAGCCATCGGTCATCAGATTCATCATCA	Contig6825	-	UNKNOWN 4251	UNKNOWN 4251	-	OM0023381-AOP	-	NA	NA	NA	NA	NA	NA	NA	NA	NA	NA	NA	NA	NA	NA	NA	NA	NA	NA	1	UU	NA
12	12	27	5L22	Contig25	no data	GCTTTTGGGAGTAGATAACGCAGAGGTTATAAATCTTTTAGAATCTGAAG	Contig25	-	POLYADENYLATE BINDING PROTEIN (3E-15).	POLYADENYLATE BINDING PROTEIN (3E-15).	-	OM0023340-AOP	-	Smp_024140.1, Smp_024140.4, Smp_024140.3, Smp_028170.3, Smp_028170.1, Smp_028170.2, Smp_034420.1, Smp_034420.3, Smp_034420.2, Smp_054620, Smp_056760, Smp_004940, Smp_080180, Smp_004000, Smp_170110, Smp_142210, Smp_157500, Smp_140900.1, Smp_140900.2, Smp_065210.2, Smp_128280.2, Smp_128280.1, Smp_065470.2, Smp_065470.1, Smp_065470.3, Smp_176360, Smp_129360, Smp_152840, Smp_078070, Smp_128480, Smp_1…	NA	NA	NA	-, +	36	shisto12082g08.q1k, shisto12452g10.q1k, shisto12637a08.p1k, shisto1699c03.q1k, shisto3178e03.p1k, shisto3861f01.q1k, shisto5047h01.q1k, shisto8385h06.p1k	-, +	8	NA	NA	NA	NA	NA	NA	NA	NA	NA	1	UU	NA
12	16	28	2P22	Contig1432	no data	CGTGTTTTCGCAAGATGAAATGATTGATGTTATAGGTGTAACCAAGGG	Contig1432	-	SIMILAR TO RIBOSOMAL PROTEIN L3 (1E-108)	SIMILAR TO RIBOSOMAL PROTEIN L3 (1E-108)	-	OM0023384-AOP	-	Smp_047200.3	60S ribosomal protein L3, putative	419	NA	+	1	shisto9675c08.p1k, shisto1430g06.p1k	+	2	PF00297	Ribosomal_L3	IPR000597	Ribosomal protein L3	Molecular Function: structural constituent of ribosome (GO:0003735), Cellular Component: intracellular (GO:0005622), Cellular Component: ribosome (GO:0005840), Biological Process: translation (GO:0006412)	NA	NA	NA	NA	1	US	NA
13	13	11	58M21	CONTIG10055	AGCAAACGTAGAAGAGCCTTTAAAAGAAGCATTTGTTACGGGTCGTCTGT	GCAAACGTAGAAGAGCCTTTAAAAGAAGCATTTGTTACGGGTCGTCTGT	Q5DFE0	Q5DFE0_SCHJA	SJCHGC01952 protein	217	343 (879)	9e-93	1	Smp_054780	40S ribosomal protein S8, putative	NA	NA	+	1	shisto10306f09.q1k, shisto11825b12.p1k	-, +	2	NA	NA	NA	NA	NA	NA	NA	NA	NA	9e-93	SS	NA
13	4	22	21I9	AI976644	CAGTACGGTAATGCAGCTGCATGGCATGTTTTTTTTTTTTTTTTTTTTTT	CAGTACGGTAATGCAGCTGCATGGCATGTTTTTTTTTTTTTTTTTTTTTT	-	-	-	-	-	-	-	NA	NA	NA	NA	NA	NA	NA	NA	NA	NA	NA	NA	NA	NA	NA	NA	NA	NA	1	UU	NA
13	28	24	17A21	Contig664	no data	TGGTCTGTTCGAAGATACAAACCTTTGTGCGATTCATGCTAAAAGGGTTA	Contig664	-	SIMILAR TO H3 HISTONE, FAMILY 3A (9E-71)	SIMILAR TO H3 HISTONE, FAMILY 3A (9E-71)	-	OM0023373-AOP	-	Smp_082240, Smp_073410, Smp_191680, Smp_048480, Smp_148080, Smp_135210	NA	NA	NA	-, +	6	shisto10343b04.p1k, shisto3731d10.p1k, shisto4775f06.q1k	-, +	3	NA	NA	NA	NA	NA	NA	NA	NA	NA	1	UU	NA
13	4	28	1M9	AF101196	no data	CTGTTCCCAGTCATGTTGATTATTTAAATGCTTCTAAGTTATGGGTAGTT	AF101196	-	SCHISTOSOMA MANSONI CYTOCHROME C OXIDASE SUBUNIT 1 (COX1) MRNA, MITOCHONDRIAL GE	SCHISTOSOMA MANSONI CYTOCHROME C OXIDASE SUBUNIT 1 (COX1) MRNA, MITOCHONDRIAL GE	-	OM0023326-AOP	-	NA	NA	NA	NA	NA	NA	NA	NA	NA	NA	NA	NA	NA	NA	NA	NA	NA	NA	1	UU	NA
13	16	28	2M21	Contig1249	no data	GATGGAGTTTACCGAAGCAGAATCTAATATGAACGATCTAGTGAGCGAG	Contig1249	-	TUBULIN, BETA, 2 POSSIBLE ANTISENSE	TUBULIN, BETA, 2 POSSIBLE ANTISENSE	-	OM0023357-AOP	-	Smp_030730	tubulin beta chain, putative	NA	NA	+	1	shisto12050b04.p1k, shisto12208g06.p1k	+	2	NA	NA	NA	NA	NA	NA	NA	NA	NA	1	US	NA
13	25	28	4A9	Contig1878	no data	GTTTAATAGTCGGTCATTAGAGGCGTGGTATCCAGTCCTTGACAAGAAAT	Contig1878	-	SIMILAR TO 60S RIBOSOMAL PROTEIN L37 (5E-42)	SIMILAR TO 60S RIBOSOMAL PROTEIN L37 (5E-42)	-	OM0023328-AOP	-	NA	NA	NA	NA	NA	NA	NA	NA	NA	NA	NA	NA	NA	NA	NA	NA	NA	NA	1	UU	NA
13	28	28	4M9	Contig1944	no data	TGGCCTAGAACTAGTTTTAACGAAATGTGTGCCAAAGGACAACTAG	Contig1944	-	SIMILAR TO 60S RIBOSOMAL PROTEIN L10 (QM PROTEIN HOMOLOG) 3E-94 POSSIBLE ANTISEN	SIMILAR TO 60S RIBOSOMAL PROTEIN L10 (QM PROTEIN HOMOLOG) 3E-94 POSSIBLE ANTISEN	-	OM0023328-AOP	-	Smp_013200.2, Smp_013200.1	NA	NA	NA	+	2	shisto12834h11.q1k, shisto2900g08.p1k, shisto3610h08.q1k, shisto7557b03.q1k, shisto8985e07.p1k	-, +	5	NA	NA	NA	NA	NA	NA	NA	NA	NA	1	US	NA
14	6	1	91F9	CL462	GTCCAGTCAGTTCTTTAAGGGCTTTTTTTATCATATCTCCATATGGAGGA	GTCCAGTCAGTTCTTTAAGGGCTTTTTTTATCATATCTCCATATGGAGGA	Q55F35	Q55F35_DICDI	Hypothetical protein	933	44.3 (103)	0.005	1	Smp_003770	histone h1/h5, putative	193	193	-	1	shisto11014a04.p1k, shisto12720f06.p1k, shisto3105c03.q1k, shisto5098e03.q1k, shisto6688b02.p1k, shisto6855d09.p1k, shisto7577a08.p1k	-, +	7	PF00538	Linker_histone	IPR005818	Histone H1/H5	Cellular Component: nucleosome (GO:0000786), Molecular Function: DNA binding (GO:0003677), Cellular Component: nucleus (GO:0005634), Biological Process: nucleosome assembly (GO:0006334)	SM00526	IPR005818	Histone H1/H5	Cellular Component: nucleosome (GO:0000786), Molecular Function: DNA binding (GO:0003677), Cellular Component: nucleus (GO:0005634), Biological Process: nucleosome assembly (GO:0006334)	1	UA	NA
14	8	1	91N9	CL662	ATTTATTACATCTGTAGCATAGCGTGTCGCTATTATTATTTGGGCAGTTT	TTTATTACATCTGTAGCATAGCGTGTCGCTATTATTATTTGGGCAGTTT	Q86EQ4	Q86EQ4_SCHJA	Clone ZZD1536 mRNA sequence	192	118 (296)	5e-26	3	Smp_179300.1, Smp_179300.2, Smp_179300.3	NA	NA	NA	-	3	shisto7940b09.q1k	+	1	NA	NA	NA	NA	NA	NA	NA	NA	NA	5e-26	SA	NA
14	6	3	84F21	SMLA36G02	CAACTGATCAATCTGCGCCTAGGGATTCTTTATTCACACCTTTACTTTCT	CAACTGATCAATCTGCGCCTAGGGATTCTTTATTCACACCTTTACTTTCT	Q5XGC3	Q5XGC3_XENTR	Hypothetical LOC496533	223	90.9 (224)	8e-17	-3	NA	NA	NA	NA	NA	NA	NA	NA	NA	NA	NA	NA	NA	NA	NA	NA	NA	NA	8e-17	AU	NA
14	2	7	71B9	CONTIG4415	ATTATCAATAAGAATGCAATGAAAGACAAGTCCTTACGAAAGAAGGCGAA	TTATCAATAAGAATGCAATGAAAGACAAGTCCTTACGAAAGAAGGCGAA	Q4GXD4	Q4GXD4_9CUCU	Ribosomal protein L27e	135	147 (372)	7e-35	3	Smp_063350	60S ribosomal protein L27e, putative	143	NA	+	1	shisto3300a11.p1k, shisto9271d08.q1k, shistopuc19N149a05.p1k	-, +	3	PF01777	Ribosomal_L27e	IPR001141	Ribosomal protein L27e	Molecular Function: structural constituent of ribosome (GO:0003735), Cellular Component: intracellular (GO:0005622), Cellular Component: ribosome (GO:0005840), Biological Process: translation (GO:0006412)	NA	NA	NA	NA	7e-35	SS	NA
14	13	9	65F21	CONTIG13333	ACGTGAAGAAGTACAACCGATATGAGAAGCGACATAAGAATATGTCTGTA	CGTGAAGAAGTACAACCGATATGAGAAGCGACATAAGAATATGTCTGTA	Q5DB08	Q5DB08_SCHJA	SJCHGC00575 protein	146	290 (742)	1e-77	-2	Smp_032760	ribosomal protein S11, putative	NA	NA	+	1	shisto12129e01.p1k, shisto12876a10.q1k, shisto422f07.p1k, shisto8218c07.p1k, shisto9956b05.p1k	-, +	5	NA	NA	NA	NA	NA	NA	NA	NA	NA	1e-77	AS	NA
14	21	22	23J9	CD065377	TGTAGGTATGATAATGAGTTTGGATACAGTTGCCGCGTAGTTGATCTCAT	TGTAGGTATGATAATGAGTTTGGATACAGTTGCCGCGTAGTTGATCTCAT	P20287	G3P_SCHMA	Glyceraldehyde-3-phosphate dehydrogenase (EC 1.2.1.12) (GAPDH) (Major larval sur	338	71.2 (173)	9e-12	-2	Smp_056970.3, Smp_056970.1	NA	NA	NA	+	2	shisto2866c09.p1k, shisto3306b11.q1k, shisto4857a10.p1k	+	3	NA	NA	NA	NA	NA	NA	NA	NA	NA	9e-12	AS	NA
14	9	23	18F21	Contig924	no data	GAAAATGGCTATCAACATCAATCGAGAGGTTGAAGATACCTTTTACAGGT	Contig924	-	SIMILAR TO EUKARYOTIC TRANSLATION INITIATION FACTOR 5 (EIF-5) 7E-56	SIMILAR TO EUKARYOTIC TRANSLATION INITIATION FACTOR 5 (EIF-5) 7E-56	-	OM0023378-AOP	-	Smp_122840.2, Smp_122840.1	NA	NA	NA	+	2	shisto1247a01.q1k, shisto3746d05.p1k, shisto550b01.p1k, shisto917h12.p1k	-, +	4	NA	NA	NA	NA	NA	NA	NA	NA	NA	1	US	NA
14	14	23	19F9	SMU82265	no data	GGTGATTAGTTGGTTTTATATTTTTATTTACGGTTGGTGGTGTCACAGGG	SMU82265	-	SCHISTOSOMA MANSONI CYTOCHROME OXIDASE C SUBUNIT 1 (COI) GENE, MITOCHONDRIAL GEN	SCHISTOSOMA MANSONI CYTOCHROME OXIDASE C SUBUNIT 1 (COI) GENE, MITOCHONDRIAL GEN	-	OM0023337-AOP	-	NA	NA	NA	NA	NA	NA	NA	NA	NA	NA	NA	NA	NA	NA	NA	NA	NA	NA	1	UU	NA
14	18	23	19F21	SMU90319	no data	GAATTTATAGCATCGTATCGTTCCAGTCTTAATCGAATGAGTGATCTTCA	SMU90319	-	SCHISTOSOMA MANSONI UBIQUINOL-CYTOCHROME C REDUCTASE COMPLEX UBIQUINOL BINDING P	SCHISTOSOMA MANSONI UBIQUINOL-CYTOCHROME C REDUCTASE COMPLEX UBIQUINOL BINDING P	-	OM0023337-AOP	-	Smp_024120	Ubiquinol-cytochrome c reductase complex 14 kDa protein, putative	130	NA	+	1	shisto12087b11.q1k, shisto12309f02.p1k, shisto7377e09.q1k, shisto9769b11.q1k, shisto10299h10.p1k	-, +	5	PF02271	UCR_14kD	IPR003197	Cytochrome bd ubiquinol oxidase, 14 kDa subunit	Biological Process: electron transport (GO:0006118), Biological Process: mitochondrial electron transport, ubiquinol to cytochrome c (GO:0006122), Molecular Function: ubiquinol-cytochrome-c reductase activity (GO:0008121)	NA	NA	NA	NA	1	US	NA
14	22	25	13N9	Contig5432	no data	TTGGATATGAACAATGGAGTAATTGCAGATATGAATGAGCTCGGGATTAT	Contig5432	-	SIMILAR TO T-COMPLEX PROTEIN 1, BETA SUBUNIT (TCP-1-BETA) 5E-10 POSSIBLE ANTISEN	SIMILAR TO T-COMPLEX PROTEIN 1, BETA SUBUNIT (TCP-1-BETA) 5E-10 POSSIBLE ANTISEN	-	OM0023382-AOP	-	Smp_054340.3, Smp_054340.1, Smp_054340.2	NA	NA	NA	+	3	shisto11113e10.q1k, shisto8052b07.q1k, shisto8576b10.q1k	+	3	NA	NA	NA	NA	NA	NA	NA	NA	NA	1	US	NA
14	2	28	1F9	Contig1113	no data	TTAGATGACGAGGCATTTGGCTACCTTAAGAGAGTCATAGTTACTCCCG	Contig1113	-	SIMILAR TO SENESCENCE-ASSOCIATED PROTEIN (2E-51)	SIMILAR TO SENESCENCE-ASSOCIATED PROTEIN (2E-51)	-	OM0023401-AOP	-	NA	NA	NA	NA	NA	NA	NA	NA	NA	NA	NA	NA	NA	NA	NA	NA	NA	NA	1	UU	NA
14	11	28	2J9	Contig1481	no data	TGGTCTAAAGGAAAAGTTCGGGATAAACTAGCTAATATGGTGTTGTTC	Contig1481	-	SIMILAR TO RIBOSOMAL PROTEIN S25 (4E-20)	SIMILAR TO RIBOSOMAL PROTEIN S25 (4E-20)	-	OM0023375-AOP	-	Smp_017450	conserved hypothetical protein	329	NA	+	1	shisto10189c02.q1k, shisto10372h04.q1k, shisto1245b03.q1k, shisto1246f03.q1k, shisto3181h01.q1k, shisto4801g11.p1k, shisto626a09.p1k, shisto6852h01.p1k, shisto7230c01.p1k, shisto7741e06.p1k	-, +	10	PF00583; PF03297	Acetyltransf_1; Ribosomal_S25	IPR000182; IPR004977	GCN5-related N-acetyltransferase; Ribosomal protein S25	-; Molecular Function: N-acetyltransferase activity (GO:0008080), Biological Process: metabolic process (GO:0008152)	NA	NA	NA	NA	1	US	NA
14	16	28	2N21	Contig1509	no data	TCTTGAGAAGAAGCATTAATTGACAGGATCCGGAAAGAAAATGACCATTT	Contig1509	-	UNKNOWN 719	UNKNOWN 719	CG13551-PC [Drosophila melanogaster]	OM0023375-AOP	-	NA	NA	NA	NA	NA	NA	NA	NA	NA	NA	NA	NA	NA	NA	NA	NA	NA	NA	1	UU	NA
15	20	3	86K9	SMLB67B02	TGTTCTGCATCACAACCACTTCAGAAAAAAGTGGCAATTTATGGTGAAAA	TGTTCTGCATCACAACCACTTCAGAAAAAAGTGGCAATTTATGGTGAAAA	Q95043	RL13_SCHMA	60S ribosomal protein L13 (BBC1 protein homolog)	184	171 (434)	3e-41	1	Smp_022640	60S ribosomal protein L13 (BBC1 protein homolog), putative	204	NA	+	1	shisto1214f05.p1k, shisto7336c08.q1k, shisto8848d08.q1k, shisto9851d01.p1k	-, +	4	PF01294	Ribosomal_L13e	IPR001380	Ribosomal protein L13e	Molecular Function: structural constituent of ribosome (GO:0003735), Cellular Component: intracellular (GO:0005622), Cellular Component: ribosome (GO:0005840), Biological Process: translation (GO:0006412)	NA	NA	NA	NA	3e-41	SS	NA
15	8	23	18C21	Contig704	no data	GAGACGCCTACTGAAAATGATATCAAGACTGTCCTAAACTCTGTTGGCAT	Contig704	-	SIMILAR TO RIBOSOMAL PROTEIN P2 (MINOR ALLERGEN) 3E-12	SIMILAR TO RIBOSOMAL PROTEIN P2 (MINOR ALLERGEN) 3E-12	-	OM0023379-AOP	-	Smp_029820	60S acidic ribosomal protein P2, putative	NA	NA	+	1	shisto12120c09.q1k, shisto1397f03.q1k, shisto9594d04.p1k, shisto3685b03.p1k, shisto3866e10.q1k, shisto8238e03.q1k, shisto8744a09.q1k, shisto285h02.q1k, shisto4470c03.p1k, shisto11103h04.p1k, shisto2988a01.p1k, shisto1557c04.q1k, shisto1863d06.q1k, shisto225g07.q1k, shisto3179b03.p1k, shisto5247a03.q1k, shisto5379a11.q1k, shisto544f03.p1k, shisto10140g06.p1k, shisto10224c05.q1k, shisto10280c05.p1k…
15	18	23	19G21	SCMCYC	no data	CCATCCATTTCAAAAATGGCTGCGAAAGCGTTTTTCGATATTAAGGCCGG	SCMCYC	-	SCHISTOSOMA MANSONI CYCLOPHILIN MRNA, COMPLETE CDS	SCHISTOSOMA MANSONI CYCLOPHILIN MRNA, COMPLETE CDS	-	OM0023376-AOP	-	Smp_040130.1, Smp_040130.2	NA	NA	NA	+	2	shisto11518e06.p1k, shisto11782b06.q1k, shisto2456a12.p1k, shisto4149b04.p1k, shisto6857c11.q1k, shistopuc19N142c09.q1k	-, +	6	NA	NA	NA	NA	NA	NA	NA	NA	NA	1	US	NA
15	20	23	19O21	SCMMEGB	no data	TGATAGTCAACTGAAATGTCGCATGACAGATGATGGTGTTTTGATGTTAG	SCMMEGB	-	SCHISTOSOMA MANSONI MAJOR EGG ANTIGEN (P40) MRNA, 3prime END	SCHISTOSOMA MANSONI MAJOR EGG ANTIGEN (P40) MRNA, 3prime END	-	OM0023376-AOP	-	Smp_049250, Smp_148550, Smp_049300.1, Smp_049300.3, Smp_186020, Smp_117310	NA	NA	NA	+	6	shisto6372e06.p1k	-	1	NA	NA	NA	NA	NA	NA	NA	NA	NA	1	US	NA
15	5	24	14K21	Contig5513	no data	CCCAGCTTTGTCACTAGTATTAAAGGAAATAAAAGTGTTCAAGCCAGTT	Contig5513	-	UNKNOWN 3242 POSSIBLE ANTISENSE	UNKNOWN 3242 POSSIBLE ANTISENSE	similar to heterogeneous ribonuclear particle protein [Xenopus laevis]	OM0023367-AOP	-	NA	NA	NA	NA	NA	NA	NA	NA	NA	NA	NA	NA	NA	NA	NA	NA	NA	NA	1	UU	NA
15	26	25	13O21	Contig5186	no data	TGATCTAAAATCTTTGCTCGTTTTCACGTCATCAAATGTTAATGAAATCT	Contig5186	-	UNKNOWN 3032	UNKNOWN 3032	ATPase, H+ transporting, lysosomal (vacuolar proton pump), subunit 1 [Danio reri	OM0023356-AOP	-	Smp_171300	hypothetical protein	NA	1143	+	1	shisto10498e07.q1k, shisto2987e12.p1k, shisto6470h08.q1k	-, +	3	NA	NA	NA	NA	NA	SM00082	IPR000483	Cysteine-rich flanking region, C-terminal	-	1	US	NA
15	5	28	1C21	AF030961	no data	TGTTAAAGTCGCAGGAGATTTGTAATTTGTAATAAAGTTTTCTTCACGGG	AF030961	-	SCHISTOSOMA MANSONI CLONE NLSL20 40S RRNA PROTEIN HOMOLOG MRNA, PARTIAL CDS [POL	SCHISTOSOMA MANSONI CLONE NLSL20 40S RRNA PROTEIN HOMOLOG MRNA, PARTIAL CDS [POL	-	OM0023326-AOP	-	NA	NA	NA	NA	NA	NA	NA	NA	NA	NA	NA	NA	NA	NA	NA	NA	NA	NA	1	UU	NA
16	26	3	86P21	SMLC11H02	GGGGGGGGGGATTTTTTTTTTTTTTTTTTTTAAGGAGGAAAGAAATTATT	GGGGGGGGGGATTTTTTTTTTTTTTTTTTTTAAGGAGGAAAGAAATTATT	-	-	-	-	-	-	-	NA	NA	NA	NA	NA	NA	NA	NA	NA	NA	NA	NA	NA	NA	NA	NA	NA	NA	1	UU	NA
16	14	22	22P9	CD063619	AATAATGGAAAAAAGGTCAAGGCGGTGAACATTCTAAAACATACATTCGA	TAATGGAAAAAAGGTCAAGGCGGTGAACATTCTAAAACATACATTCGA	Q86EP9	Q86EP9_SCHJA	Clone ZZD1552 mRNA sequence	194	70.9 (172)	1e-11	-1	Smp_093440	40S ribosomal protein S5, putative	194	NA	+	1	shisto6601c02.p1k	+	1	PF00177	Ribosomal_S7	IPR000235	Ribosomal protein S7	Molecular Function: structural constituent of ribosome (GO:0003735), Cellular Component: intracellular (GO:0005622), Cellular Component: ribosome (GO:0005840), Biological Process: translation (GO:0006412)	NA	NA	NA	NA	1e-11	AS	NA
17	14	2	88I20	SMLC27D11	CCCCCCCCCCCCCCCTTTTTTTTTTTTTTTTTTTTTTTTTTTTTTTTTTT	CCCCCCCCCCCCCCCTTTTTTTTTTTTTTTTTTTTTTTTTTTTTTTTTTT	-	-	-	-	-	-	-	NA	NA	NA	NA	NA	NA	NA	NA	NA	NA	NA	NA	NA	NA	NA	NA	NA	NA	1	UU	NA
17	17	2	89A8	SMLC32A10	CCCCAAAAAATTTTTTTTTTTTTTTTTTTTTTTTTTCCGCCCCCCCCTTT	CCCCAAAAAATTTTTTTTTTTTTTTTTTTTTTTTTTCCGCCCCCCCCTTT	-	-	-	-	-	-	-	NA	NA	NA	NA	NA	NA	NA	NA	NA	NA	NA	NA	NA	NA	NA	NA	NA	NA	1	UU	NA
18	19	3	86F8	SMLA61A10	CCCGTTTTTTTTTGTTTTACCCCCCCCCCCCCTTTTTTTTTTTTTTTTTT	CCCGTTTTTTTTTGTTTTACCCCCCCCCCCCCTTTTTTTTTTTTTTTTTT	-	-	-	-	-	-	-	NA	NA	NA	NA	NA	NA	NA	NA	NA	NA	NA	NA	NA	NA	NA	NA	NA	NA	1	UU	NA
18	26	3	86N20	SMLC11D01A	AGTGAAGAAGTTTGTTTAAATAGCCGCGATTATTTATCGTGCTAAGGTAG	GTGAAGAAGTTTGTTTAAATAGCCGCGATTATTTATCGTGCTAAGGTAG	-	-	-	-	-	-	-	NA	NA	NA	NA	NA	NA	NA	NA	NA	NA	NA	NA	NA	NA	NA	NA	NA	NA	1	UU	NA
18	24	12	57B8	CF493074	TTGCTTTCGTTACCTGTGTTAGCCAGAGGAATAACGATGTTATTATTTGA	TTGCTTTCGTTACCTGTGTTAGCCAGAGGAATAACGATGTTATTATTTGA	-	-	-	-	-	-	-	Smp_184920, Smp_184440, Smp_184550	NA	NA	NA	+	3	shisto12493a01.p1k, shisto5521b03.q1k, shisto5531a02.q1k, shisto12161a03.p1k	-, +	4	NA	NA	NA	NA	NA	NA	NA	NA	NA	1	US	NA
18	4	23	18B8	Contig809	no data	TACAAAGCTAAACTCATACTGTTCCCTCTAAATCCAGCGAAGCCTCAGG	Contig809	-	SIMILAR TO 60S RIBOSOMAL PROTEIN L13 (BBC1 PROTEIN HOMOLOG) 2E-88 POSSIBLE ANTIS	SIMILAR TO 60S RIBOSOMAL PROTEIN L13 (BBC1 PROTEIN HOMOLOG) 2E-88 POSSIBLE ANTIS	-	OM0023377-AOP	-	Smp_022640	60S ribosomal protein L13 (BBC1 protein homolog), putative	204	NA	+	1	shisto3113d07.p1k	-	1	PF01294	Ribosomal_L13e	IPR001380	Ribosomal protein L13e	Molecular Function: structural constituent of ribosome (GO:0003735), Cellular Component: intracellular (GO:0005622), Cellular Component: ribosome (GO:0005840), Biological Process: translation (GO:0006412)	NA	NA	NA	NA	1	US	NA
18	6	23	18J8	Contig852	no data	TCGAGAAAGAATTGAACAAAATGAGGTCCCAACTTGCACCCATGAGAGCA	Contig852	-	UNKNOWN 474 POSSIBLE ANTISENSE	UNKNOWN 474 POSSIBLE ANTISENSE	unnamed protein product [Mus musculus]	OM0023377-AOP	-	NA	NA	NA	NA	NA	NA	NA	NA	NA	NA	NA	NA	NA	NA	NA	NA	NA	NA	1	UU	NA
18	9	23	18F20	Contig836	no data	GCAAGCTATTGCTAAGTCAGTGGTAGCATTCCATCAAAAATACGTTGATG	Contig836	-	SIMILAR TO RIBOSOMAL PROTEIN S16 3E-49 POSSIBLE ANTISENSE	SIMILAR TO RIBOSOMAL PROTEIN S16 3E-49 POSSIBLE ANTISENSE	-	OM0023377-AOP	-	Smp_119920	ribosomal protein S9, putative	151	NA	+	1	shisto11292h05.q1k, shisto12117e04.p1k, shisto12310b10.p1k, shisto5072c09.p1k, shisto5381h03.p1k, shisto6942e04.p1k, shisto8218g02.q1k	-, +	7	PF00380	Ribosomal_S9	IPR000754	Ribosomal protein S9	Molecular Function: structural constituent of ribosome (GO:0003735), Cellular Component: intracellular (GO:0005622), Cellular Component: ribosome (GO:0005840), Biological Process: translation (GO:0006412)	NA	NA	NA	NA	1	US	NA
18	13	23	19B8	SMA416904	no data	GGTTGAGCAGGTTTCGTAGTTTTATTATTTTTGTTACTTGGAATGTGGAG	SMA416904	-	SCHISTOSOMA MANSONI MITOCHONDRION PARTIAL ND6 GENE FOR NADH DEHYDROGENASE SUBUNI	SCHISTOSOMA MANSONI MITOCHONDRION PARTIAL ND6 GENE FOR NADH DEHYDROGENASE SUBUNI	-	OM0023338-AOP	-	NA	NA	NA	NA	NA	NA	NA	NA	NA	NA	NA	NA	NA	NA	NA	NA	NA	NA	1	UU	NA
18	15	23	19J8	SMPR28SRR	no data	TTGAAAAGTACTTGAAGAGAGAGTAAACAGTGCGTGAAACCGCTCAAAGG	SMPR28SRR	-	S.MANSONI GENE FOR 28S RIBOSOMAL RNA (NMRI-PUERTO RICA)	S.MANSONI GENE FOR 28S RIBOSOMAL RNA (NMRI-PUERTO RICA)	-	OM0023338-AOP	-	NA	NA	NA	NA	NA	NA	NA	NA	NA	NA	NA	NA	NA	NA	NA	NA	NA	NA	1	UU	NA
18	13	24	15J20	Contig603	no data	TGGGAAGAAAATCACTGCTTTTGTACCTAATGATGGCTGCTTAAATTTC	Contig603	-	SIMILAR TO 40S RIBOSOMAL PROTEIN S23 (3E-56) POSSIBLE ANTISENSE	SIMILAR TO 40S RIBOSOMAL PROTEIN S23 (3E-56) POSSIBLE ANTISENSE	-	OM0023350-AOP	-	Smp_167760, Smp_074470, Smp_007180, Smp_011710, Smp_180180, Smp_045940, Smp_158450.2, Smp_158450.1	NA	NA	NA	-, +	8	shisto11267e04.p1k, shisto12668b01.q1k, shisto3479c08.p1k, shisto4473h05.q1k	-, +	4	NA	NA	NA	NA	NA	NA	NA	NA	NA	1	UU	NA
18	16	24	16F8	Contig647	no data	GCATTTCGACACCACTTGACGATGTGATTACATTGTAGTTGGTTAATTTT	Contig647	-	SIMILAR TO HEAT SHOCK PROTEIN 60 (2E-48) POSSIBLE ANTISENSE	SIMILAR TO HEAT SHOCK PROTEIN 60 (2E-48) POSSIBLE ANTISENSE	-	OM0023371-AOP	-	NA	NA	NA	NA	NA	NA	NA	NA	NA	NA	NA	NA	NA	NA	NA	NA	NA	NA	1	UU	NA
18	24	25	13F20	Contig5306	no data	TCTTCTTCATCAACTTCGGGAGTGTTAGTATCCTGAGTATTTTGCTGTG	Contig5306	-	SIMILAR TO PREFOLDIN 2 (1E-26) POSSIBLE ANTISENSE	SIMILAR TO PREFOLDIN 2 (1E-26) POSSIBLE ANTISENSE	-	OM0023366-AOP	-	Smp_030290	prefoldin subunit 2, putative	143	NA	+	1	shisto3075d11.q1k, shisto3075f11.q1k, shisto5505b03.p1k, shisto6532b04.p1k	-, +	4	PF01920	Prefoldin_2	IPR002777	Prefoldin beta-like	Biological Process: protein folding (GO:0006457), Cellular Component: prefoldin complex (GO:0016272), Molecular Function: unfolded protein binding (GO:0051082)	NA	NA	NA	NA	1	US	NA
18	8	26	8J8	Contig355	no data	CTGGTGTGTTGGTGTATTTCAGTAAGTCTTTTTGTATGTTTAGGTATAT	Contig355	-	SIMILAR TO NADH DEHYDROGENASE SUBUNIT 2 (3E-98) (POSSIBLE ANTISENSE)	SIMILAR TO NADH DEHYDROGENASE SUBUNIT 2 (3E-98) (POSSIBLE ANTISENSE)	-	OM0023361-AOP	-	NA	NA	NA	NA	NA	NA	NA	NA	NA	NA	NA	NA	NA	NA	NA	NA	NA	NA	1	UU	NA
18	28	27	7B20	Contig3157	no data	TACGACTAAATAGTCCTGTCTGTACTCAGGTTGATGAAAAAATCGCAC	Contig3157	-	SIMILAR TO EUKARYOTIC TRANSLATION INITIATION FACTOR 2 SUBUNIT 3, Y-LINKED (EIF-2	SIMILAR TO EUKARYOTIC TRANSLATION INITIATION FACTOR 2 SUBUNIT 3, Y-LINKED (EIF-2	-	OM0023334-AOP	-	Smp_095150	eukaryotic translation initiation factor 2 gamma subunit (eif-2-gamma), putative	462	NA	+	1	shisto3113c05.p1k, shisto4751d03.q1k	-, +	2	PF00009; PF03144; PF09173	eIF2_C; GTP_EFTU; GTP_EFTU_D2	IPR000795; IPR004161; IPR015256	Initiation factor eIF2 gamma, C terminal; Protein synthesis factor, GTP-binding; Translation elongation factor EFTu/EF1A, domain 2	-; Molecular Function: GTP binding (GO:0005525); Molecular Function: GTPase activity (GO:0003924), Molecular Function: GTP binding (GO:0005525)	NA	NA	NA	NA	1	US	NA
18	5	28	1B20	Contig1009	no data	CAAGAAGAAACTTCGTTAAGCCCTAATTAAAGCGAATAAATTTTTCTCGG	Contig1009	-	SIMILAR TO UBIQUITIN/RIBOSOMAL FUSION PROTEIN 1E-69 POSSIBLE ANTISENSE	SIMILAR TO UBIQUITIN/RIBOSOMAL FUSION PROTEIN 1E-69 POSSIBLE ANTISENSE	-	OM0023369-AOP	-	NA	NA	NA	NA	NA	NA	NA	NA	NA	NA	NA	NA	NA	NA	NA	NA	NA	NA	1	UU	NA
18	8	28	1N20	Contig1075	no data	TTGTCTACAAGTTAATGAGTAAAGATGTTGATATTCTCAACCGACGCAA	Contig1075	-	SIMILAR TO UBIQUINOL-CYTOCHROME C REDUCTASE COMPLEX CORE PROTEIN 2, MITOCHONDRIA	SIMILAR TO UBIQUINOL-CYTOCHROME C REDUCTASE COMPLEX CORE PROTEIN 2, MITOCHONDRIA	-	OM0023369-AOP	-	Smp_079450	ubiquinol-cytochrome C reductase complex core protein, putative	345	NA	+	1	shisto3120h01.q1k, shisto507a08.q1k, shisto9038h06.q1k	-, +	3	PF00675	Peptidase_M16	IPR011765	Peptidase M16, N-terminal	Molecular Function: metalloendopeptidase activity (GO:0004222), Biological Process: proteolysis (GO:0006508)	NA	NA	NA	NA	1	US	NA
18	16	28	2N20	Contig1420	no data	TATACCGGTGTTGTTGTGATGAACATGAGTGATATGCCTCTAGGTTTCGG	Contig1420	-	SIMILAR TO PEACHY PROTEIN (1E-49) POSSIBLE ANTISENSE (REQUIRED FOR 60S RIBOSOMAL	SIMILAR TO PEACHY PROTEIN (1E-49) POSSIBLE ANTISENSE (REQUIRED FOR 60S RIBOSOMAL	-	OM0023384-AOP	-	Smp_021760	60S ribosome subunit biogenesis protein nip7-related	179	179	+	1	shisto1967b07.q1k	+	1	PF01472	PUA	IPR002478	PUA	Molecular Function: RNA binding (GO:0003723)	SM00359	IPR002478	PUA	Molecular Function: RNA binding (GO:0003723)	1	US	NA
18	17	28	3B8	Contig1698	no data	GATTTTTTATACATTTTTCGTTAAGTTTTCCCCTACATCGTGCACAACGG	Contig1698	-	UNKNOWN 791	UNKNOWN 791	hypothetical	OM0023329-AOP	-	Smp_034420.1, Smp_034420.3, Smp_034420.2	NA	NA	NA	+	3	shisto10923h04.p1k, shisto1635b09.p1k, shisto2371b05.p1k, shisto3350f04.p1k	-, +	4	NA	NA	NA	NA	NA	NA	NA	NA	NA	1	US	NA
19	9	2	88G8	SMLC26A02	GGGGAAGGGGGGGGCGTTTTCTTTTTTTTTTTTTTTTTTTTTTTTTTTTT	GGGGAAGGGGGGGGCGTTTTCTTTTTTTTTTTTTTTTTTTTTTTTTTTTT	-	-	-	-	-	-	-	NA	NA	NA	NA	NA	NA	NA	NA	NA	NA	NA	NA	NA	NA	NA	NA	NA	NA	1	UU	NA
19	8	16	41C20	CD134048	ATGCCAAAAGATAAGATAAAGCCACGCCTGTGACACCACCAACCGTAAAT	TGCCAAAAGATAAGATAAAGCCACGCCTGTGACACCACCAACCGTAAAT	Q9B8X8	Q9B8X8_SCHMA	Cytochrome c oxidase subunit 1	609	40.8 (94)	0.013	2	NA	NA	NA	NA	NA	NA	NA	NA	NA	NA	NA	NA	NA	NA	NA	NA	NA	NA	1	UU	NA
19	19	18	36K8	CD118736	GTATGGTTAAAAGCATCTGCTGAACAACAGTTTCTTTACGGACAAAATGT	GTATGGTTAAAAGCATCTGCTGAACAACAGTTTCTTTACGGACAAAATGT	Q86EJ8	Q86EJ8_SCHJA	Clone ZZD271 mRNA sequence	151	264 (675)	1e-69	3	Smp_021760	60S ribosome subunit biogenesis protein nip7-related	179	179	+	1	shisto12954a10.p1k, shisto2065a09.q1k, shisto3628g05.q1k, shisto4317e02.p1k, shisto9357g08.p1k	-, +	5	PF01472	PUA	IPR002478	PUA	Molecular Function: RNA binding (GO:0003723)	SM00359	IPR002478	PUA	Molecular Function: RNA binding (GO:0003723)	1e-69	SS	NA
19	17	23	19C20	SCMRRNAC	no data	TATTAGACGGAAAGACCCCAAGAGCTTTTTTTGTGTTAGATTTGTTTGGG	SCMRRNAC	-	SCHISTOSOMA MANSONI RIBOSOMAL RNA	SCHISTOSOMA MANSONI RIBOSOMAL RNA	-	OM0023390-AOP	-	NA	NA	NA	NA	NA	NA	NA	NA	NA	NA	NA	NA	NA	NA	NA	NA	NA	NA	1	UU	NA
19	19	24	16C20	Contig6332	no data	TATCGGTACCTTCAGCGTAGGATGCAAATAAACTTTGGGTATGTGAT	Contig6332	-	UNKNOWN 3837	UNKNOWN 3837	-	OM0023372-AOP	-	NA	NA	NA	NA	NA	NA	NA	NA	NA	NA	NA	NA	NA	NA	NA	NA	NA	NA	1	UU	NA
19	23	26	10G8	Contig4152	no data	GTACTCATGAAGTTGCTTTTGTTCGGACTTAATACGTGATGCTAAATCAC	Contig4152	-	UNKNOWN 2640	UNKNOWN 2640	RIKEN cDNA 2610511G16 [Mus musculus]	OM0023403-AOP	-	Smp_056360.8, Smp_056360.6, Smp_056360.5, Smp_056360.4, Smp_056360.3	NA	NA	NA	-	5	shisto426a01.q1k	-	1	NA	NA	NA	NA	NA	NA	NA	NA	NA	1	UA	NA
19	3	28	1K8	AF521086.1	no data	CATAAAGCTAGTCGATAAATATTTCGCCAAACGCGGTGAACTGGCTAACA	AF521086.1	-	SCHISTOSOMA MANSONI CLONE P17C5 UNKNOWN MRNA	SCHISTOSOMA MANSONI CLONE P17C5 UNKNOWN MRNA	-	OM0023389-AOP	-	Smp_054160	Glutathione S-transferase 28 kDa (GST 28) (GST class-mu), putative	NA	NA	-	1	shisto11944e10.p1k, shisto3456c11.p1k, shisto3528d05.p1k	-, +	3	NA	NA	NA	NA	NA	NA	NA	NA	NA	1	UA	NA
19	9	28	2C8	Contig1275	no data	CGCCAGAAAGTACAATATCTCAGCTATGCCAACGTTTATAGCCATTAAAA	Contig1275	-	SIMILAR TO THIOREDOXIN (9E-53)	SIMILAR TO THIOREDOXIN (9E-53)	-	OM0023353-AOP	-	Smp_008070	thioredoxin, putative	106	NA	+	1	shisto11114g08.q1k, shisto2082a10.p1k, shisto826g01.p1k, shisto8722d08.q1k, shistopuc19N58c06.q1k	-, +	5	PF00085	Thioredoxin	IPR013766	Thioredoxin domain	-	NA	NA	NA	NA	1	US	NA
19	11	28	2K8	Contig1318	no data	CCCGGAATGAACTATGTATTTGTACAGTACATTTGCTGACATCTTTTTTC	Contig1318	-	UNKNOWN 643	UNKNOWN 643	leucine-rich protein [Schistosoma mansoni]	OM0023353-AOP	-	NA	NA	NA	NA	NA	NA	NA	NA	NA	NA	NA	NA	NA	NA	NA	NA	NA	NA	1	UU	NA
19	12	28	2O8	Contig134	no data	TCTCATTTCCGCTAAAGGTAGTTCGAATTCCTATGCAATCATAAAGAAGG	Contig134	-	SIMILAR TO 40S RIBOSOMAL PROTEIN S5 (9E-54) (POSSIBLE ANTISENSE)	SIMILAR TO 40S RIBOSOMAL PROTEIN S5 (9E-54) (POSSIBLE ANTISENSE)	-	OM0023353-AOP	-	Smp_093440, Smp_010290, Smp_041980, Smp_129060, Smp_005350	NA	NA	NA	+	5	shisto5308g08.q1k, shistopuc19N30b12.p1k	+	2	NA	NA	NA	NA	NA	NA	NA	NA	NA	1	US	NA
19	17	28	3C8	Contig1621	no data	TGATCGGTTTTCTAGAATAGCACCTATTGGTGGCATGACGCTCGTATTC	Contig1621	-	SIMILAR TO HYPOTHETICAL PROTEIN Y106G6H.8 (2E-22)	SIMILAR TO HYPOTHETICAL PROTEIN Y106G6H.8 (2E-22)	-	OM0023385-AOP	-	Smp_096290.1	expressed protein	143	NA	+	1	shisto10709e10.q1k, shisto11919c10.p1k, shisto1533f10.q1k, shisto3037b11.p1k, shisto722d12.q1k, shisto7859c08.q1k, shisto8424g02.p1k, shisto10128e02.q1k, shisto1022g11.q1k, shisto10684c02.q1k, shisto11587f08.p1k, shisto11763b07.q1k, shisto1440b11.q1k, shisto7035b07.q1k	-, +	14	PF04241	DUF423	IPR006696	Protein of unknown function DUF423	-	NA	NA	NA	NA	1	US	NA
20	17	23	19D20	SMEF1ALPH	no data	CGCAAAGGTTGCAAAGAAAAAGTAATTTGAACATATTCAGTTAACCAATT	SMEF1ALPH	-	S.MANSONI MRNA FOR ELONGATION FACTOR 1-ALPHA [POLY-A TAIL REMOVED]	S.MANSONI MRNA FOR ELONGATION FACTOR 1-ALPHA [POLY-A TAIL REMOVED]	-	OM0023338-AOP	-	NA	NA	NA	NA	NA	NA	NA	NA	NA	NA	NA	NA	NA	NA	NA	NA	NA	NA	1	UU	NA
20	17	27	6L8	Contig2846	no data	GAATCAAGAGATGCAAACACTTCGAACTTGGTGGAGATAAGAAGAAGAAA	Contig2846	-	SIMILAR TO RIBOSOMAL PROTEIN L44 (9E-45)	SIMILAR TO RIBOSOMAL PROTEIN L44 (9E-45)	-	OM0023394-AOP	-	Smp_035790	expressed protein	NA	NA	+	1	shisto2035c07.p1k, shisto3443f10.p1k, shisto4423f09.p1k	-, +	3	NA	NA	NA	NA	NA	NA	NA	NA	NA	1	US	NA
20	18	27	6P8	Contig287	no data	GGAGGATAGCACGTTTAAATTCTTCGAAGTTATTTGCATTGATCCTTTCC	Contig287	-	SIMILAR TO RIBOSOMAL PROTEIN L15 (1E-59)	SIMILAR TO RIBOSOMAL PROTEIN L15 (1E-59)	-	OM0023394-AOP	-	Smp_032260, Smp_164620, Smp_160000.2, Smp_160000.1, Smp_154240, Smp_015690	NA	NA	NA	+	6	shisto8550e11.p1k	-	1	NA	NA	NA	NA	NA	NA	NA	NA	NA	1	US	NA
20	14	28	2H20	Contig1389	no data	CTATGGACTAAAGTACTTGGTTGAAAAATTCAGATTACCCATCCAAACAA	Contig1389	-	SIMILAR TO 40S RIBOSOMAL PROTEIN S12 (9E-34)	SIMILAR TO 40S RIBOSOMAL PROTEIN S12 (9E-34)	-	OM0023384-AOP	-	Smp_060090.1, Smp_060090.2	NA	NA	NA	+	2	shisto620h09.p1k	-	1	NA	NA	NA	NA	NA	NA	NA	NA	NA	1	US	NA
21	1	3	84A7	SMLA33B01	GGCGGGGCCCTTTTTTTTTTTTTTTTTTTTTTTCCCCCTAAAATTTTTTT	GGCGGGGCCCTTTTTTTTTTTTTTTTTTTTTTTCCCCCTAAAATTTTTTT	Q4X6Z3	Q4X6Z3_PLACH	Hypothetical protein (Fragment)	120	37.7 (86)	0.8	-2	NA	NA	NA	NA	NA	NA	NA	NA	NA	NA	NA	NA	NA	NA	NA	NA	NA	NA	1	UU	NA
21	22	5	79I19	CONTIG8637	AGAATGCGATTAGTAAAGTTATCCAGAGTCATCACAGAATGCGATCAGTA	GAATGCGATTAGTAAAGTTATCCAGAGTCATCACAGAATGCGATCAGTA	Q3YSX8	Q3YSX8_EHRCJ	Hypothetical protein	671	32.7 (73)	5.9	-1	NA	NA	NA	NA	NA	NA	NA	NA	NA	NA	NA	NA	NA	NA	NA	NA	NA	NA	1	UU	NA
22	21	4	83B7	SMLA1B03	TTACCAAGATCTAAGTCAGCCCGCGAGCTGTTCCACTGGATGATAAAGCC	TTACCAAGATCTAAGTCAGCCCGCGAGCTGTTCCACTGGATGATAAAGCC	Q5DHN8	Q5DHN8_SCHJA	SJCHGC07042 protein	234	140 (352)	7e-32	-1	NA	NA	NA	NA	NA	NA	NA	NA	NA	NA	NA	NA	NA	NA	NA	NA	NA	NA	7e-32	AU	NA
22	9	23	18F19	Contig923	no data	GTCCTCTAAAAAGCCTACCAAGCGTTAGTTTGAAATAGATTTCTAATGGT	Contig923	-	SIMILAR TO 60S RIBOSOMAL PROTEIN L19 (2E-58) POSSIBLE ANTISENSE	SIMILAR TO 60S RIBOSOMAL PROTEIN L19 (2E-58) POSSIBLE ANTISENSE	-	OM0023378-AOP	-	NA	NA	NA	NA	NA	NA	NA	NA	NA	NA	NA	NA	NA	NA	NA	NA	NA	NA	1	UU	NA
22	17	23	19B19	SMU54588	no data	CAAAAGTAGTCACTCCGCTTCTGAAAAACACTTATGTTTATGGGTTTCGA	SMU54588	-	SCHISTOSOMA MANSONI FIBRILLIN 2 MRNA, PARTIAL CDS	SCHISTOSOMA MANSONI FIBRILLIN 2 MRNA, PARTIAL CDS	-	OM0023337-AOP	-	NA	NA	NA	NA	NA	NA	NA	NA	NA	NA	NA	NA	NA	NA	NA	NA	NA	NA	1	UU	NA
22	6	24	14N19	Contig579	no data	TCATACTTGCTACAAAAGACGATATTGTTCCTAAGGTACCTGCAGCTGCT	Contig579	-	SIMILAR TO RIBOSOMAL PROTEIN L17 (3E-21) POSSIBLE ANTISENSE	SIMILAR TO RIBOSOMAL PROTEIN L17 (3E-21) POSSIBLE ANTISENSE	-	OM0023351-AOP	-	Smp_024850, Smp_006340, Smp_041480.3, Smp_041480.2, Smp_041480.1, Smp_160760, Smp_086690	NA	NA	NA	-, +	7	shisto10177c11.q1k, shisto12688h07.p1k, shisto7314f10.q1k, shisto9530d04.p1k	-, +	4	NA	NA	NA	NA	NA	NA	NA	NA	NA	1	UU	NA
22	13	25	12N7	Contig507	no data	TCTATAGGGTTTATATACGCTGTGGCAGATTTCTTGATCTACAAATTACG	Contig507	-	SIMILAR TO MITOCHONDRIAL INNER MEMBRANE TRANSLOCATING PROTEIN (2E-10)	SIMILAR TO MITOCHONDRIAL INNER MEMBRANE TRANSLOCATING PROTEIN (2E-10)	-	OM0023358-AOP	-	Smp_080980.1, Smp_080980.2, Smp_080980.3	NA	NA	NA	+	3	shisto11264h06.q1k, shisto11386a10.q1k, shisto4344c09.q1k, shisto9529b02.p1k, shistoFOS_48g10.q1kT7	-, +	5	NA	NA	NA	NA	NA	NA	NA	NA	NA	1	US	NA
22	8	26	8J7	Contig3640	no data	TATCTAACTAACTAGTACGTACTACTTCCAGTACTACTAATCCGGCGCCC	Contig3640	-	UNKNOWN 2303	UNKNOWN 2303	-	OM0023368-AOP	-	NA	NA	NA	NA	NA	NA	NA	NA	NA	NA	NA	NA	NA	NA	NA	NA	NA	NA	1	UU	NA
22	5	28	1B19	Contig1097	no data	GTCGCTACCTGAGTTTATCCTTGTCTTGGTATTACCCAGTTTAATAAACA	Contig1097	-	SIMILAR TO ELONGATION FACTOR 1 GAMMA (6E-38)	SIMILAR TO ELONGATION FACTOR 1 GAMMA (6E-38)	-	OM0023401-AOP	-	Smp_083410	elongation factor 1 gamma, putative	417	NA	+	1	shisto10808e01.p1k, shisto4135f02.q1k, shisto8940e10.q1k	-, +	3	PF00043; PF00647; PF02798	EF1G; GST_C; GST_N	IPR001662; IPR004045; IPR004046	Glutathione S-transferase, C-terminal; Glutathione S-transferase, N-terminal; Translation elongation factor EF1B, gamma chain, conserved	-; Molecular Function: translation elongation factor activity (GO:0003746), Cellular Component: eukaryotic translation elongation factor 1 complex (GO:0005853), Biological Process: translational elongation (GO:0006414)	NA	NA	NA	NA	1	US	NA
22	9	28	2B7	Contig1437	no data	TCAGTCTCATCACTTGCTTGTTATGTTGATCTTAATAGTCACCAAGTTTG	Contig1437	-	UNKNOWN 682	UNKNOWN 682	hypothetical	OM0023375-AOP	-	NA	NA	NA	NA	NA	NA	NA	NA	NA	NA	NA	NA	NA	NA	NA	NA	NA	NA	1	UU	NA
22	21	28	3B19	Contig1793	no data	TCTTGGTGGTAGTAGCAAATATTCAAGTGAGAACCTTGAAGCCCCGCAT	Contig1793	-	SIMILAR TO RRNA PROMOTER BINDING PROTEIN 4E-17	SIMILAR TO RRNA PROMOTER BINDING PROTEIN 4E-17	-	OM0023327-AOP	-	NA	NA	NA	NA	NA	NA	NA	NA	NA	NA	NA	NA	NA	NA	NA	NA	NA	NA	1	UU	NA
22	23	28	3J19	Contig1837	no data	TTATGTCTTTTTGTAACATTTTTATCGATTTTTATTCTGACCCCGCATCT	Contig1837	-	UNKNOWN 857	UNKNOWN 857	acidic repetitive protein arp1 - Tetrahymena thermophila (pir|A54138)	OM0023327-AOP	-	NA	NA	NA	NA	NA	NA	NA	NA	NA	NA	NA	NA	NA	NA	NA	NA	NA	NA	1	UU	NA
23	4	15	44C19	CD148306	AGACCAACATCGCTTAGATGCAGAAGAAATCGAAAAATGATTAATGATGC	GACCAACATCGCTTAGATGCAGAAGAAATCGAAAAATGATTAATGATGC	Q86EY7	Q86EY7_SCHJA	Clone ZZD1287 mRNA sequence	224	149 (377)	4e-35	1	Smp_049550	heat shock protein 70 (hsp70), putative	648	NA	+	1	shisto2016a01.q1k, shistoFOS_9i07.p1kSP6	-	2	PF00012	HSP70	IPR013126	Heat shock protein 70	-	NA	NA	NA	NA	4e-35	SS	NA
23	24	21	27C7	CD078655	CTGTAGTCCTCACGACCATCATCTAAAATCTTTGGTTTTGTATCGTAATC	CTGTAGTCCTCACGACCATCATCTAAAATCTTTGGTTTTGTATCGTAATC	Q5DFC5	Q5DFC5_SCHJA	SJCHGC06267 protein	219	208 (529)	9e-53	3	Smp_021730.2, Smp_021730.3, Smp_021730.1	NA	NA	NA	+	3	shisto10006h12.p1kv, shisto10887d04.q1k, shisto1107d08.q1k, shisto12177d10.p1k, shisto1248d09.p1k, shisto1293e12.q1k, shisto177h11.q1k, shisto2062d08.p1k, shisto2086c06.q1k, shisto2367d07.q1k, shisto3091d12.q1k, shisto3947h12.q1k, shisto4072d01.p1k, shisto4693c12.p1k, shisto4874f08.p1k, shisto4892d08.p1k, shisto6528h10.q1k, shisto6732a04.p1k, shisto6934f05.p1k, shisto708b06.q1k, shisto712f05.p1k,…	-, +	24	NA	NA	NA	NA	NA	NA	NA	NA	NA	9e-53	SS	NA
23	16	26	9K7	Contig374	no data	TACTTCTCTTCAAGTCTGGTTAATTCGGAGAAAACCGAAAATTCAAGAG	Contig374	-	SIMILAR TO DYNEIN LIGHT CHAIN-2 (8E-45)	SIMILAR TO DYNEIN LIGHT CHAIN-2 (8E-45)	-	OM0023360-AOP	-	NA	NA	NA	NA	NA	NA	NA	NA	NA	NA	NA	NA	NA	NA	NA	NA	NA	NA	1	UU	NA
23	1	27	4C19	Contig1893	no data	CAGATGGAACTATGATTCACTTTAAGAATCCAAAAGTCCAAGCAGCTCCA	Contig1893	-	SIMILAR TO TRANSCRIPTION FACTOR BTF3 HOMOLOG (4E-31)	SIMILAR TO TRANSCRIPTION FACTOR BTF3 HOMOLOG (4E-31)	-	OM0023328-AOP	-	Smp_002180.2, Smp_002180.3, Smp_002180.1	NA	NA	NA	+	3	shisto1142c04.q1k, shisto7406f04.q1k, shisto900b12.q1k	-	3	NA	NA	NA	NA	NA	NA	NA	NA	NA	1	US	NA
23	2	28	1G7	AF035770	no data	CATTCAAAAGAAAACCTGTTCATCCTGTGGATATCCTTCTGCTAGATTA	AF035770	-	SCHISTOSOMA MANSONI RIBOSOMAL PROTEIN L37 MRNA, COMPLETE CDS [POLY-A TAIL REMOVE	SCHISTOSOMA MANSONI RIBOSOMAL PROTEIN L37 MRNA, COMPLETE CDS [POLY-A TAIL REMOVE	-	OM0023326-AOP	-	Smp_035800	60S ribosomal protein L37, putative	NA	NA	+	1	shisto12447g04.q1k, shisto5042d06.q1k, shisto7193e02.q1k, shisto8814e08.q1k, shisto12463g06.q1k, shisto10770e02.p1k, shisto3196e11.q1k, shisto8668g03.p1k, shisto10136d12.q1k, shisto10407h05.q1k, shisto10664a11.p1k, shisto11102a10.q1k, shisto11674c10.p1k, shisto11792b06.p1k, shisto12278c12.p1k, shisto2431d04.q1k, shisto3260b08.q1k, shisto5436b02.q1k, shisto6603h02.q1k, shisto7120b09.q1k, shisto807…	-, +	1574	NA	NA	NA	NA	NA	NA	NA	NA	NA	1	US	NA
23	4	28	1O7	AF140785	no data	TTGCTACTTCTATCGGCTGCGTGTTTCTTTTACAATCATATTTTTTGTTT	AF140785	-	SCHISTOSOMA MANSONI RHO GTPASE MRNA, PARTIAL CDS	SCHISTOSOMA MANSONI RHO GTPASE MRNA, PARTIAL CDS	-	OM0023326-AOP	-	NA	NA	NA	NA	NA	NA	NA	NA	NA	NA	NA	NA	NA	NA	NA	NA	NA	NA	1	UU	NA
23	5	28	1C19	AF030960	no data	TCACAGCGAGGTTCAAAGAAAGATGAAAAAGAAGATGAGGATAAGCAGAA	AF030960	-	SCHISTOSOMA MANSONI CLONE NLSL19 S5A 26S PROTEASOME MRNA, PARTIAL CDS [POLY-A TA	SCHISTOSOMA MANSONI CLONE NLSL19 S5A 26S PROTEASOME MRNA, PARTIAL CDS [POLY-A TA	-	OM0023326-AOP	-	Smp_000740.2, Smp_000740.1	NA	NA	NA	+	2	shisto3213e07.q1k, shisto498d11.q1k, shisto9604d07.p1k	-, +	3	NA	NA	NA	NA	NA	NA	NA	NA	NA	1	US	NA
23	21	28	3C19	Contig1540	no data	TGGTTGGAACTGTTTTCAATTTCGTGTTCAAAATAGATTGTCATATCGCT	Contig1540	-	SIMILAR TO ETHANOL INDUCED PROTEIN 6 (9E-16) POSSIBLE ANTISENSE	SIMILAR TO ETHANOL INDUCED PROTEIN 6 (9E-16) POSSIBLE ANTISENSE	-	OM0023335-AOP	-	NA	NA	NA	NA	NA	NA	NA	NA	NA	NA	NA	NA	NA	NA	NA	NA	NA	NA	1	UU	NA
24	25	17	40P7	CD133054	ATAACAGGACTTACAGATGTTTATCGATTTTGTGAGCTTCTCTATACCGC	TAACAGGACTTACAGATGTTTATCGATTTTGTGAGCTTCTCTATACCGC	Q5DEB4	Q5DEB4_SCHJA	SJCHGC09285 protein	287	186 (472)	3e-46	-3	Smp_171570	60S ribosomal protein L19, putative	872	NA	-	1	shisto4610g06.q1k, shisto8611g09.p1k	-, +	2	PF01280	Ribosomal_L19e	IPR000196	Ribosomal protein L19/L19e	Molecular Function: structural constituent of ribosome (GO:0003735), Cellular Component: intracellular (GO:0005622), Cellular Component: ribosome (GO:0005840), Biological Process: translation (GO:0006412)	NA	NA	NA	NA	3e-46	AA	NA
24	3	22	21H7	AI395751	GTCCATTGTGCAGATAATAGACACTCTTAATACTAGCAAAATAAATTGTT	GTCCATTGTGCAGATAATAGACACTCTTAATACTAGCAAAATAAATTGTT	Q6BK61	Q6BK61_DEBHA	Similar to CA1130|CaNAG1 Candida albicans CaNAG1 Glucosamine-6-phosphate deamina	252	31.2 (69)	9.8	2	NA	NA	NA	NA	NA	NA	NA	NA	NA	NA	NA	NA	NA	NA	NA	NA	NA	NA	1	UU	NA
24	1	28	1D7	Contig1101	no data	GTTATCGTTTCTGGTAAAATTAAAGGTCAGAGAGCGAAAGCTATGAAG	Contig1101	-	SIMILAR TO RIBOSOMAL PROTEIN S3 (2E-80)	SIMILAR TO RIBOSOMAL PROTEIN S3 (2E-80)	-	OM0023401-AOP	-	Smp_027610, Smp_131450	NA	NA	NA	+	2	shisto7413e02.q1k	-	1	NA	NA	NA	NA	NA	NA	NA	NA	NA	1	US	NA
24	15	28	2L19	Contig1497	no data	GGTTTTGGGTATATAAAGTGGATGTAGTATTTGTTTTGAGTGAAGGGAAA	Contig1497	-	SIMILAR TO NADH DEHYDROGENASE 3 (NADH DEHYDROGENASE SUBUNIT 3) 6E-35 POSSIBLE AN	SIMILAR TO NADH DEHYDROGENASE 3 (NADH DEHYDROGENASE SUBUNIT 3) 6E-35 POSSIBLE AN	-	OM0023375-AOP	-	NA	NA	NA	NA	NA	NA	NA	NA	NA	NA	NA	NA	NA	NA	NA	NA	NA	NA	1	UU	NA
24	17	28	3D7	Contig1799	no data	TCAAGGTTCTCACTTGAATATTTGCTACTACCACCAAGATCTGCGCCTGT	Contig1799	-	SIMILAR TO HEMOLYSIN 7E-04	SIMILAR TO HEMOLYSIN 7E-04	-	OM0023327-AOP	-	NA	NA	NA	NA	NA	NA	NA	NA	NA	NA	NA	NA	NA	NA	NA	NA	NA	NA	1	UU	NA
25	5	24	14I18	Contig5591	no data	TCGACGTTCGGGAAAGACTGTTACTGATACAGGCTTCACATTGCTAGAA	Contig5591	-	SIMILAR TO ELONGATION FACTOR 1-ALPHA (4E-43) POSSIBLE ANTISENSE	SIMILAR TO ELONGATION FACTOR 1-ALPHA (4E-43) POSSIBLE ANTISENSE	-	OM0023347-AOP	-	Smp_099870.1	elongation factor 1-alpha (ef-1-alpha), putative	465	NA	+	1	shisto7244b06.p1k, shisto10719d06.q1k, shisto1553b08.p1k	-, +	3	PF00009; PF03143; PF03144	GTP_EFTU; GTP_EFTU_D2; GTP_EFTU_D3	IPR000795; IPR004160; IPR004161	Protein synthesis factor, GTP-binding; Translation elongation factor EFTu/EF1A, C-terminal; Translation elongation factor EFTu/EF1A, domain 2	Molecular Function: GTP binding (GO:0005525); Molecular Function: GTPase activity (GO:0003924), Molecular Function: GTP binding (GO:0005525)	NA	NA	NA	NA	1	US	NA
25	21	28	3A18	Contig1615	no data	CACCGTAAATGTTTCTAATCTGACTTCATTACTTTGTACAAATGGTATAA	Contig1615	-	SIMILAR TO ACTIN 1 (3E-58) POSSIBLE ANTISENSE	SIMILAR TO ACTIN 1 (3E-58) POSSIBLE ANTISENSE	-	OM0023385-AOP	-	NA	NA	NA	NA	NA	NA	NA	NA	NA	NA	NA	NA	NA	NA	NA	NA	NA	NA	1	UU	NA
25	28	28	4M6	Contig2029	no data	GTATATCCTCTAGACCTGGTCAAATCGGTCGAGCAGATGGTTATATTCTC	Contig2029	-	SIMILAR TO RIBOSOMAL PROTEIN S8 (4E-60) POSSIBLE ANTISENSE	SIMILAR TO RIBOSOMAL PROTEIN S8 (4E-60) POSSIBLE ANTISENSE	-	OM0023386-AOP	-	Smp_054780	40S ribosomal protein S8, putative	NA	NA	+	1	shisto1604h11.q1k, shisto10343a09.p1k, shisto11278d06.p1k, shisto4494f12.p1k	-, +	4	NA	NA	NA	NA	NA	NA	NA	NA	NA	1	US	NA
26	16	1	92N6	CL1098	GTTTCAATCTTCACTGTTTCTTCTCTAATTCCATTGCTCATGCATTTTTC	GTTTCAATCTTCACTGTTTCTTCTCTAATTCCATTGCTCATGCATTTTTC	-	-	-	-	-	-	-	NA	NA	NA	NA	NA	NA	NA	NA	NA	NA	NA	NA	NA	NA	NA	NA	NA	NA	1	UU	NA
26	7	4	81N6	CONTIG9778	TTTTTTCAGCTTTCTAATGAAATACCAGAAACGTGATTTGGCTACAACTG	TTTTTTCAGCTTTCTAATGAAATACCAGAAACGTGATTTGGCTACAACTG	Q5DH26	Q5DH26_SCHJA	SJCHGC06172 protein	176	315 (806)	8e-85	1	Smp_191540	60S ribosomal protein L18a, putative	75	NA	-	1	shisto11381d11.q1k, shisto9350a11.q1k	-, +	2	PF01775	Ribosomal_L18ae	IPR002670	Ribosomal protein L18ae	Molecular Function: structural constituent of ribosome (GO:0003735), Cellular Component: intracellular (GO:0005622), Cellular Component: ribosome (GO:0005840), Biological Process: translation (GO:0006412)	NA	NA	NA	NA	8e-85	SA	NA
26	5	8	68B6	CONTIG2951	CTTGTCCTTGCACTTTGATATTAATGTGTTCTGAAGGAGCTTCCTTATTG	CTTGTCCTTGCACTTTGATATTAATGTGTTCTGAAGGAGCTTCCTTATTG	Q5BS96	Q5BS96_SCHJA	SJCHGC05342 protein	90	159 (402)	2e-38	1	Smp_045510	ubiquitin-like protein sumo/smt3-related	90	90	-	1	shisto10522a09.p1k, shisto9659c03.q1k	-	2	PF00240	ubiquitin	IPR000626	Ubiquitin	Biological Process: protein modification process (GO:0006464)	SM00213	IPR000626	Ubiquitin	Biological Process: protein modification process (GO:0006464)	2e-38	SA	NA
26	14	13	52N6	CD188169	TGACAAAGCTGTATATTGCTTCTTGAACTTATCTACCAGTCCTGGGATTG	TGACAAAGCTGTATATTGCTTCTTGAACTTATCTACCAGTCCTGGGATTG	Q5BS66	Q5BS66_SCHJA	SJCHGC05868 protein (Fragment)	170	148 (374)	4e-35	3	Smp_019750.1, Smp_019750.2	NA	NA	NA	-	2	shisto2897e09.p1k, shisto3034e02.p1k	+	2	NA	NA	NA	NA	NA	NA	NA	NA	NA	4e-35	SA	NA
26	1	24	14J6	Contig5673	no data	TAGCTAGTGAACAGTGTGGTTTACCTAGTGCAAGAGCATTGTGTGAA	Contig5673	-	SIMILAR TO MITOCHONDRIAL RIBOSOMAL PROTEIN L20 (L20MT) 3E-06 POSSIBLE ANTISENSE	SIMILAR TO MITOCHONDRIAL RIBOSOMAL PROTEIN L20 (L20MT) 3E-06 POSSIBLE ANTISENSE	-	OM0023349-AOP	-	Smp_004980	50S ribosomal protein L20, putative	163	NA	+	1	shisto10273c10.p1k, shisto2482f06.p1k, shisto4856f04.p1k, shisto5284c12.p1k, shisto7133a07.q1k, shisto3707b01.q1k	-, +	6	PF00453	Ribosomal_L20	IPR005813	Ribosomal protein L20	Molecular Function: RNA binding (GO:0003723), Molecular Function: structural constituent of ribosome (GO:0003735), Cellular Component: intracellular (GO:0005622), Cellular Component: ribosome (GO:0005840), Biological Process: translation (GO:0006412)	NA	NA	NA	NA	1	US	NA
26	27	25	14B6	Contig563	no data	GCTGTAGCCTATGGTCTTTGTTTGTTGATATTGCATTTCTTTGGTTCAGT	Contig563	-	UNKNOWN 306 POSSIBLE ANTISENSE	UNKNOWN 306 POSSIBLE ANTISENSE	membrane component, chromosome 11, surface marker 1 [Homo sapiens]	OM0023349-AOP	-	NA	NA	NA	NA	NA	NA	NA	NA	NA	NA	NA	NA	NA	NA	NA	NA	NA	NA	1	UU	NA
26	4	26	7N18	Contig3221	no data	TTGATCTGAACAAAGACCCAGAGCTTAGTATTTTTCATAATATATATTCG	Contig3221	-	SIMILAR TO SPLICING FACTOR 3A SUBUNIT 2 (SPLICEOSOME ASSOCIATED PROTEIN 62) 1E-1	SIMILAR TO SPLICING FACTOR 3A SUBUNIT 2 (SPLICEOSOME ASSOCIATED PROTEIN 62) 1E-1	-	OM0023334-AOP	-	NA	NA	NA	NA	NA	NA	NA	NA	NA	NA	NA	NA	NA	NA	NA	NA	NA	NA	1	UU	NA
26	1	27	4B18	Contig2056	no data	TAAGCAGAAGAGTAGATCAACATGGAAGGTCGAGCTCATTCGCAGAGTT	Contig2056	-	SIMILAR TO MAJOR EGG ANTIGEN (P40) 1E-179	SIMILAR TO MAJOR EGG ANTIGEN (P40) 1E-179	-	OM0023330-AOP	-	Smp_049250, Smp_049240	NA	NA	NA	+	2	shisto12096b10.p1k, shisto1357g06.q1k, shisto1572c04.q1k, shisto6896g11.p1k, shisto9354c03.p1k	-, +	5	NA	NA	NA	NA	NA	NA	NA	NA	NA	1	US	NA
26	10	28	2F6	Contig1371	no data	GAGCTTCAAAAATTAGGAAATTGTTTAATCTGTCGAAGAAGGACAATGTT	Contig1371	-	SIMILAR TO 40S RIBOSOMAL PROTEIN S6 (6E-80)	SIMILAR TO 40S RIBOSOMAL PROTEIN S6 (6E-80)	-	OM0023384-AOP	-	Smp_053130	40S ribosomal protein S6, putative	248	NA	+	1	shisto11042g01.q1k, shisto1785b03.p1k, shisto702c09.p1k	-, +	3	PF01092	Ribosomal_S6e	IPR001377	Ribosomal protein S6e	Molecular Function: structural constituent of ribosome (GO:0003735), Cellular Component: intracellular (GO:0005622), Cellular Component: ribosome (GO:0005840), Biological Process: translation (GO:0006412)	NA	NA	NA	NA	1	US	NA
26	18	28	3F6	Contig172	no data	CGGAAGTACTCAGTATGGATTGGTGGTTCTATTTTGGCTTCATTATCAAC	Contig172	-	S. MANSONI ACTIN 1 (NEAR N-TERMINUS)	S. MANSONI ACTIN 1 (NEAR N-TERMINUS)	-	OM0023329-AOP	-	Smp_161920, Smp_161930, Smp_046590.2, Smp_046600, Smp_149640, Smp_019010, Smp_057650, Smp_079650, Smp_136910, Smp_183320, Smp_182010.1, Smp_182010.2, Smp_184430, Smp_107320, Smp_187350, Smp_051260	NA	NA	NA	-, +	16	shisto11571d05.q1k, shisto3874g04.p1k, shisto3874g04.q1k, shisto8773c02.q1k	-, +	4	NA	NA	NA	NA	NA	NA	NA	NA	NA	1	UU	NA
27	8	1	91O6	CL733	ACCTAAAGTTTTTGGCAAGACCTATGCGACTCCGCGAAGACCGTTTGAGA	CCTAAAGTTTTTGGCAAGACCTATGCGACTCCGCGAAGACCGTTTGAGA	Q5DHN8	Q5DHN8_SCHJA	SJCHGC07042 protein	234	288 (736)	3e-76	3	Smp_180000	40S ribosomal protein S9, putative	NA	NA	+	1	shisto476f10.q1k, shisto9177a05.p1k	-, +	2	NA	NA	NA	NA	NA	NA	NA	NA	NA	3e-76	SS	NA
27	25	7	73G18	CONTIG5596	TGCGATCCAGAAGAAACTAACTGTTTTTGAATGCCAGTTAAAGTATGTTG	TGCGATCCAGAAGAAACTAACTGTTTTTGAATGCCAGTTAAAGTATGTTG	Q5DFI3	Q5DFI3_SCHJA	SJCHGC06005 protein	269	324 (831)	3e-87	3	Smp_099160.1, Smp_099160.4, Smp_099160.2, Smp_099160.3	NA	NA	NA	-	4	shisto11435e01.q1k, shisto1820d12.q1k, shisto2805b01.p1k, shisto5442g12.p1k	-, +	4	NA	NA	NA	NA	NA	NA	NA	NA	NA	3e-87	SA	NA
27	19	9	66O6	CONTIG2281	TTTTCACGAATTCGGAGTTCAGCAGCAGATATGAATCCATTTCCATCTTT	TTTTCACGAATTCGGAGTTCAGCAGCAGATATGAATCCATTTCCATCTTT	Q6WSU5	Q6WSU5_BRABE	Calmodulin	149	103 (257)	3e-21	1	Smp_026560.2, Smp_026560.1	NA	NA	NA	-	2	shisto7037b03.p1k	+	1	NA	NA	NA	NA	NA	NA	NA	NA	NA	3e-21	SA	NA
27	5	11	58C6	CF500608	CATGTCATCGTTCCCCTGCACACTGTTCGGTCATAAGAAAAGCCATACAC	CATGTCATCGTTCCCCTGCACACTGTTCGGTCATAAGAAAAGCCATACAC	Q6I666	Q6I666_CITLA	Cytochrome P450 like_TBP	80	50.8 (120)	1e-05	3	Smp_174950	40S ribosomal protein S19, putative	NA	NA	+	1	shisto1063d10.q1k, shisto11712h11.q1k, shisto3574h03.q1k, shisto3295d09.q1k, shisto12237f05.q1k, shisto3438c10.q1k, shisto599a04.p1k, shisto9654b04.q1k	-, +	8	NA	NA	NA	NA	NA	NA	NA	NA	NA	1	US	NA
27	11	21	25O6	CD074836	CTTTATCAACAGGGTCGTAATCATCAAATGTGGGACTCGGGACTATTTGA	CTTTATCAACAGGGTCGTAATCATCAAATGTGGGACTCGGGACTATTTGA	Q86ER1	Q86ER1_SCHJA	Clone ZZD1516 mRNA sequence	313	215 (547)	4e-55	-3	NA	NA	NA	NA	NA	NA	NA	NA	NA	NA	NA	NA	NA	NA	NA	NA	NA	NA	4e-55	AU	NA
27	17	23	19C18	SCMRRNAB	no data	TTATTAGACGGAAAGACCCCAAGAGCTTTTTTTGTGTTAAATTTGTTTG	SCMRRNAB	-	SCHISTOSOMA MANSONI RIBOSOMAL RNA	SCHISTOSOMA MANSONI RIBOSOMAL RNA	-	OM0023390-AOP	-	NA	NA	NA	NA	NA	NA	NA	NA	NA	NA	NA	NA	NA	NA	NA	NA	NA	NA	1	UU	NA
27	12	24	15G18	Contig593	no data	TAGTTTGAGGTTTCTCGCTATTATACATGGTGATCAACAGTTCTTTGTGT	Contig593	-	UNKNOWN 320 POSSIBLE ANTISENSE	UNKNOWN 320 POSSIBLE ANTISENSE	polybinding protein, cytoplasmic 1 [Rattus norvegicus] (ref|A)	OM0023348-AOP	-	NA	NA	NA	NA	NA	NA	NA	NA	NA	NA	NA	NA	NA	NA	NA	NA	NA	NA	1	UU	NA
27	25	25	13K18	Contig525	no data	TCAGGTTGCCAAGACAATATTCAGTGTGCTTAAATGAGAAGTGTAAAACT	Contig525	-	SIMILAR TO UBIQUINOL-CYTOCHROME C REDUCTASE HINGE PROTEIN (2E-07) POSSIBLE ANTIS	SIMILAR TO UBIQUINOL-CYTOCHROME C REDUCTASE HINGE PROTEIN (2E-07) POSSIBLE ANTIS	-	OM0023332-AOP	-	Smp_059930, Smp_018800, Smp_132470, Smp_132480, Smp_136830.1, Smp_136830.2, Smp_006390, Smp_150800, Smp_195000, Smp_091390.1, Smp_091390.2, Smp_091390.3	NA	NA	NA	+	12	shisto1934c07.q1k, shisto3326e11.p1k	+	2	NA	NA	NA	NA	NA	NA	NA	NA	NA	1	US	NA
27	6	26	8G6	Contig3447	no data	CAAAGGGCAGACGTCAAGTCTGTTAAGATTAAAGAAAATAAAGACAATGT	Contig3447	-	SIMILAR TO RIBOSOMAL PROTEIN L38	SIMILAR TO RIBOSOMAL PROTEIN L38	-	OM0023362-AOP	-	NA	NA	NA	NA	NA	NA	NA	NA	NA	NA	NA	NA	NA	NA	NA	NA	NA	NA	1	UU	NA
27	13	26	8O18	Contig3497	no data	GAAATGAAAGAAGTGTATGCTAACATACGCAAAAACATGCTGCTGGACTA	Contig3497	-	UNKNOWN 2178	UNKNOWN 2178	hypothetical	OM0023362-AOP	-	Smp_021730.2, Smp_021730.3, Smp_021730.1	NA	NA	NA	+	3	shisto1245h08.p1k	-	1	NA	NA	NA	NA	NA	NA	NA	NA	NA	1	US	NA
27	27	27	7O6	Contig314	no data	GTGGAGGGTGAGCTTAAAGAAAAGATACCTGAAAGTGATCGTCAAGTAA	Contig314	-	S. MANSONI HEAT SHOCK 70 KDA HOMOLOG PROTEIN (HSP70) (MAJOR SURFACE ANTIGEN).	S. MANSONI HEAT SHOCK 70 KDA HOMOLOG PROTEIN (HSP70) (MAJOR SURFACE ANTIGEN).	-	OM0023336-AOP	-	Smp_094680, Smp_106930.1, Smp_106930.2, Smp_076660, Smp_170030, Smp_033760.1, Smp_033760.2, Smp_068420	NA	NA	NA	+	8	shisto2937b06.p1k, shisto7084f03.p1k, shisto8727d02.p1k	-, +	3	NA	NA	NA	NA	NA	NA	NA	NA	NA	1	US	NA
27	2	28	1G6	AF358139.1	no data	TTAAATCTCAGGTCAACAAGTACATGAAGAATGTCCTTGATAACTTTGAC	AF358139.1	-	SCHISTOSOMA MANSONI PUTATIVE HISTAMINE-RELEASING FACTOR MRNA, PARTIAL CDS	SCHISTOSOMA MANSONI PUTATIVE HISTAMINE-RELEASING FACTOR MRNA, PARTIAL CDS	-	OM0023389-AOP	-	Smp_054240	Translationally-controlled tumor protein homolog (TCTP) (Histamine-releasing factor), putative	170	NA	+	1	shisto12715b01.q1k, shisto6784b04.q1k, shisto10005e03.p1ku, shisto4701a08.p1k, shisto5325e11.p1k, shisto5332h03.p1k, shisto1002d07.q1k, shisto10040h01.p1k, shisto10118e02.p1k, shisto10308a03.q1k, shisto10317g02.p1k, shisto10334a09.p1k, shisto1036g10.p1k, shisto10385g03.p1k, shisto10393f09.p1k, shisto10393f09.q1k, shisto10677h05.q1k, shisto10693h08.q1k, shisto10705a10.p1k, shisto10741g02.q1k, shis…	-, +	524	PF00838	TCTP	IPR001983	Translationally controlled tumour-associated TCTP	Cellular Component: cytoplasm (GO:0005737)	NA	NA	NA	NA	1	US	NA
27	4	28	1O6	AY158212.1	no data	TTGCTACTTCTATCGGCTGCGTGTTTCTTTAACAATCATATTTTTTGTTT	AY158212.1	-	SCHISTOSOMA MANSONI RHO GTPASE (RHO1) MRNA, COMPLETE CDS	SCHISTOSOMA MANSONI RHO GTPASE (RHO1) MRNA, COMPLETE CDS	-	OM0023389-AOP	-	NA	NA	NA	NA	NA	NA	NA	NA	NA	NA	NA	NA	NA	NA	NA	NA	NA	NA	1	UU	NA
27	6	28	1G18	AF375996.1	no data	TCGGCTATTGCTGAACTAGATACGTTATCGGAAGAAAGTTACAAAGATTC	AF375996.1	-	SCHISTOSOMA MANSONI 14-3-3 EPSILON 2 MRNA, COMPLETE CDS	SCHISTOSOMA MANSONI 14-3-3 EPSILON 2 MRNA, COMPLETE CDS	-	OM0023389-AOP	-	Smp_002410	14-3-3 epsilon 2	NA	NA	+	1	shisto4548d06.q1k, shisto6841b12.p1k, shisto7549c07.q1k, shisto7551g11.q1k	-, +	4	NA	NA	NA	NA	NA	NA	NA	NA	NA	1	US	NA
27	16	28	2O18	Contig1344	no data	GGGTAAAGAACCTGCAAAAGAAGAAAAGAAACCAGTTTCTGATGATG	Contig1344	-	SIMILAR TO 60S ACIDIC RIBOSOMAL PROTEIN P1 (2E-15)	SIMILAR TO 60S ACIDIC RIBOSOMAL PROTEIN P1 (2E-15)	-	OM0023353-AOP	-	Smp_041980	60S acidic ribosomal protein P1, putative	NA	NA	+	1	shisto3496d06.q1k, shisto425g05.p1k, shisto6706h04.q1k	+	3	NA	NA	NA	NA	NA	NA	NA	NA	NA	1	US	NA
27	17	28	3C6	Contig1620	no data	TGAATTCGATGGTGTGTTTAAGGAGTTCCAAAAAGTATGGATGCATAATT	Contig1620	-	UNKNOWN 760	UNKNOWN 760	hypothetical	OM0023385-AOP	-	NA	NA	NA	NA	NA	NA	NA	NA	NA	NA	NA	NA	NA	NA	NA	NA	NA	NA	1	UU	NA
28	19	3	86H6	SMLA63E01	CAGTGTGCTGGAAAGCCCCCCTCTTTTTTTTTTTTTTTTTTTTTTTTTTT	CAGTGTGCTGGAAAGCCCCCCTCTTTTTTTTTTTTTTTTTTTTTTTTTTT	-	-	-	-	-	-	-	NA	NA	NA	NA	NA	NA	NA	NA	NA	NA	NA	NA	NA	NA	NA	NA	NA	NA	1	UU	NA
29	21	11	59I17	CONTIG10401	TTGTACTTCACTGTACCGTTGCAAATTTGGACGGGATTCAGACTTAGAGG	TTGTACTTCACTGTACCGTTGCAAATTTGGACGGGATTCAGACTTAGAGG	Q9AVH2	Q9AVH2_PEA	Putative senescence-associated protein (Fragment)	282	56.6 (135)	4e-07	-3	Smp_113000, Smp_184810	NA	NA	NA	+	2	shisto10936c08.q1k, shisto4352d12.p1k, shisto7327c03.p1k, shisto7327g03.p1k	-, +	4	NA	NA	NA	NA	NA	NA	NA	NA	NA	1	US	NA
29	1	27	4A17	Contig1881	no data	TTTGGACTGACAGAACATATTGACCTGGGACTAAAATATGATCCTGCTAT	Contig1881	-	SIMILAR TO RIBOSOMAL PROTEIN L11 (3E-63) POSSIBLE ANTISENSE	SIMILAR TO RIBOSOMAL PROTEIN L11 (3E-63) POSSIBLE ANTISENSE	-	OM0023328-AOP	-	Smp_050940.2, Smp_050940.1	NA	NA	NA	+	2	shisto11176d07.q1k, shisto12370g11.p1k, shisto345c05.p1k	-, +	3	NA	NA	NA	NA	NA	NA	NA	NA	NA	1	US	NA
29	6	28	1e+17	AF030971	no data	TATTTATCGAGTTAGAGAATAGCTGAGTGTGTTGGTTATTTAGGACAGAG	AF030971	-	SCHISTOSOMA MANSONI CLONE 13 UNKNOWN MRNA, PARTIAL CDS [POLY-A TAIL REMOVED]	SCHISTOSOMA MANSONI CLONE 13 UNKNOWN MRNA, PARTIAL CDS [POLY-A TAIL REMOVED]	-	OM0023326-AOP	-	NA	NA	NA	NA	NA	NA	NA	NA	NA	NA	NA	NA	NA	NA	NA	NA	NA	NA	1	UU	NA
29	9	28	2A5	Contig1177	no data	GAGTGAAGCAATGGGTCTGTTTTGTCTAGTGATGGCTTTCCTCATTTTAT	Contig1177	-	SIMIALAR TO ATP SYNTHASE LIPID BINDING PROTEIN, MITOCHONDRIAL PRECURSOR (EC 3.6.	SIMIALAR TO ATP SYNTHASE LIPID BINDING PROTEIN, MITOCHONDRIAL PRECURSOR (EC 3.6.	-	OM0023357-AOP	-	Smp_000880.2, Smp_000880.1	NA	NA	NA	+	2	shisto12234e05.p1k, shistopuc19N117d04.q1k	-, +	2	NA	NA	NA	NA	NA	NA	NA	NA	NA	1	US	NA
29	14	28	2e+17	Contig1203	no data	CAGAACTAGATCAGCTTCAAGATGATTCCTACAAAGACAGCACACTAATT	Contig1203	-	SIMILAR TO 14-3-3 PROTEIN HOMOLOG 1 (1E-141)	SIMILAR TO 14-3-3 PROTEIN HOMOLOG 1 (1E-141)	-	OM0023357-AOP	-	Smp_009780.2, Smp_009780.1, Smp_009760	NA	NA	NA	+	3	shisto10940f10.p1k, shisto1999h12.p1k, shisto3333e08.p1k, shisto4204f05.p1k, shisto6539d06.p1k, shisto9392a07.q1k, shisto9913a06.q1k, shisto7646e10.q1k, shisto2605b11.p1k	-, +	9	NA	NA	NA	NA	NA	NA	NA	NA	NA	1	US	NA
29	22	28	3e+17	Contig1550	no data	TGCATCCAAACTTATCCCTTTGGCCTATGGGATTAAGAAACTCCAAATTG	Contig1550	-	SIMILAR TO ELONGATION FACTOR 1-BETA (EF-1-BETA) 2E-51	SIMILAR TO ELONGATION FACTOR 1-BETA (EF-1-BETA) 2E-51	-	OM0023335-AOP	-	Smp_030690	elongation factor 1-beta, putative	214	NA	+	1	shisto4688c07.q1k, shisto9989c06.p1k	-	2	PF00736	EF1_GNE	IPR014038	Translation elongation factor EF1B, beta and delta chains, guanine nucleotide exchange	Molecular Function: translation elongation factor activity (GO:0003746), Cellular Component: eukaryotic translation elongation factor 1 complex (GO:0005853), Biological Process: translational elongation (GO:0006414)	NA	NA	NA	NA	1	US	NA
30	25	1	93B17	CL1246	GAAACCTGGCGGTAGAGTAAAAGGGCAAAAGCTTACTTGATTTTGATTTT	GAAACCTGGCGGTAGAGTAAAAGGGCAAAAGCTTACTTGATTTTGATTTT	Q9AVH2	Q9AVH2_PEA	Putative senescence-associated protein (Fragment)	282	67.4 (163)	1e-09	1	NA	NA	NA	NA	NA	NA	NA	NA	NA	NA	NA	NA	NA	NA	NA	NA	NA	NA	1	UU	NA
30	14	6	75F17	CONTIG6580	GCTAAACGGAACCAGTATACATGCTTCGGTAAGTCATCACAGTGATTATA	GCTAAACGGAACCAGTATACATGCTTCGGTAAGTCATCACAGTGATTATA	Q02455	MLP1_YEAST	Protein MLP1 (Myosin-like protein 1)	1875	32.7 (73)	3.5	-3	NA	NA	NA	NA	NA	NA	NA	NA	NA	NA	NA	NA	NA	NA	NA	NA	NA	NA	1	UU	NA
30	10	13	51N17	CD184254	GACGAAATATGTAATCCACATCGGGAGGCTACAATGTCGTAAAATGAATG	GACGAAATATGTAATCCACATCGGGAGGCTACAATGTCGTAAAATGAATG	Q5DC44	Q5DC44_SCHJA	SJCHGC01959 protein	142	87.8 (216)	9e-17	1	Smp_098960	60S ribosomal protein L26, putative	142	NA	+	1	shisto11330h12.p1k, shisto2595b06.q1k, shisto5275g04.p1k, shisto8763a06.q1k, shisto9746g12.q1k	-, +	5	PF00467	KOW	IPR005824	KOW	-	NA	NA	NA	NA	9e-17	SS	NA
30	6	22	21N5	BF936355	GTTGCTAAAGTTACCAAATCCCCCGCAAAGGTTTCAAAGAAAAAGTAATT	GTTGCTAAAGTTACCAAATCCCCCGCAAAGGTTTCAAAGAAAAAGTAATT	Q94747	Q94747_SCHMA	Elongation factor 1-alpha	465	40.0 (92)	0.022	-3	NA	NA	NA	NA	NA	NA	NA	NA	NA	NA	NA	NA	NA	NA	NA	NA	NA	NA	1	UU	NA
30	8	24	15F5	Contig609	no data	GGACCTGGGCCTAATTCTGATTCTATTGATCCTATTGATGAAAATAACTT	Contig609	-	SIMILAR TO BC-2 PROTEIN (PUTATIVE BREAST ADENOCARCINOMA MARKER 32 KD) 2E-38 POSS	SIMILAR TO BC-2 PROTEIN (PUTATIVE BREAST ADENOCARCINOMA MARKER 32 KD) 2E-38 POSS	-	OM0023345-AOP	-	Smp_016390.2, Smp_072740, Smp_042270.1, Smp_042270.2, Smp_042270.3, Smp_094340, Smp_161160, Smp_129950.2, Smp_129950.1, Smp_132850.2	NA	NA	NA	-, +	10	shisto10349f10.p1k, shisto11312e07.q1k, shisto12344f08.q1k, shisto672b11.p1k	-, +	4	NA	NA	NA	NA	NA	NA	NA	NA	NA	1	UU	NA
30	19	27	6B17	Contig2887	no data	TTATTGCAATGATAGAGCGACCTAAAGTCAAGTCAGAATATCCCGACTGT	Contig2887	-	UNKNOWN 1654	UNKNOWN 1654	-	OM0023397-AOP	-	NA	NA	NA	NA	NA	NA	NA	NA	NA	NA	NA	NA	NA	NA	NA	NA	NA	NA	1	UU	NA
30	22	27	6N17	Contig2956	no data	GAGGGGAAGATGTTTAAAAGATAAAAGAGAGGAGTATAATAAGAAGAAAA	Contig2956	-	UNKNOWN 1715 POSSIBLE ANTISENSE	UNKNOWN 1715 POSSIBLE ANTISENSE	-	OM0023397-AOP	-	NA	NA	NA	NA	NA	NA	NA	NA	NA	NA	NA	NA	NA	NA	NA	NA	NA	NA	1	UU	NA
30	5	28	1B17	Contig1096	no data	TCGACATAATATTGTTCAGCTACCGAAAGAGGATACTGAAAATGGTTTGA	Contig1096	-	SIMILAR TO POLYPYRIMIDINE TRACT BINDING PROTEIN (PTB PROTEIN) (HEPHAESTUS) 2E-37	SIMILAR TO POLYPYRIMIDINE TRACT BINDING PROTEIN (PTB PROTEIN) (HEPHAESTUS) 2E-37	-	OM0023401-AOP	-	Smp_036590.2, Smp_036590.1	NA	NA	NA	+	2	shisto4807d07.q1k, shisto5748f03.q1k, shisto5765c06.q1k	-, +	3	NA	NA	NA	NA	NA	NA	NA	NA	NA	1	US	NA
30	9	28	2B5	Contig1436	no data	CGTTAAGACACTTGTTGACAGTGACTTGTAGGAAAGCCTGATTTATATA	Contig1436	-	SIMILAR TO CALMODULIN (1E-13)	SIMILAR TO CALMODULIN (1E-13)	-	OM0023375-AOP	-	NA	NA	NA	NA	NA	NA	NA	NA	NA	NA	NA	NA	NA	NA	NA	NA	NA	NA	1	UU	NA
30	10	28	2F5	Contig1458	no data	GAAATATGAGTACCTCCCTACATCTAAAGGTGTCTCATCTCTTAACTTTA	Contig1458	-	UNKNOWN 693	UNKNOWN 693	CG4593-PA [Drosophila melanogaster]	OM0023375-AOP	-	NA	NA	NA	NA	NA	NA	NA	NA	NA	NA	NA	NA	NA	NA	NA	NA	NA	NA	1	UU	NA
30	22	28	3F17	Contig1813	no data	CAGGGTTCGACACAAGGATATCCGTAAATTTCTTGATGGTATATATGTAT	Contig1813	-	SIMILAR TO 60S RIBOSOMAL PROTEIN L9 (2E-53)	SIMILAR TO 60S RIBOSOMAL PROTEIN L9 (2E-53)	-	OM0023327-AOP	-	Smp_018990	60S ribosomal protein L9, putative	186	NA	+	1	shisto1138e04.p1k, shisto12424a01.q1k	-, +	2	PF00347	Ribosomal_L6	IPR000702	Ribosomal protein L6	Molecular Function: structural constituent of ribosome (GO:0003735), Cellular Component: intracellular (GO:0005622), Cellular Component: ribosome (GO:0005840), Biological Process: translation (GO:0006412)	NA	NA	NA	NA	1	US	NA
30	23	28	3J17	Contig1836	no data	TGTAGTAAATTCGACAGGTCAATGCTGTCTTCACTATTGTGCTTCTA	Contig1836	-	SIMILAR TO 26S PROTEASOME NON-ATPASE REGULATORY SUBUNIT 10 (26S PROTEASOME REGUL	SIMILAR TO 26S PROTEASOME NON-ATPASE REGULATORY SUBUNIT 10 (26S PROTEASOME REGUL	-	OM0023327-AOP	-	Smp_064320.1, Smp_064320.3, Smp_064320.2, Smp_064320.5, Smp_064320.4	NA	NA	NA	+	5	shisto11349g12.q1k, shisto1683c02.p1k, shisto5790a11.q1k, shisto6552c10.p1k, shisto7609a03.p1k	-, +	5	NA	NA	NA	NA	NA	NA	NA	NA	NA	1	US	NA
31	13	18	35C17	CD113116	ATTGGGAGCGGGAAGGCAGTTCAATATTTAAATGAAATAAAAGATAGCGT	TTGGGAGCGGGAAGGCAGTTCAATATTTAAATGAAATAAAAGATAGCGT	Q6AZM9	Q6AZM9_XENLA	Eft-2-prov protein	850	117 (294)	8e-26	1	NA	NA	NA	NA	NA	NA	NA	NA	NA	NA	NA	NA	NA	NA	NA	NA	NA	NA	8e-26	SU	NA
31	27	21	27O5	CD081027	TTTTGGTCTTCCATGTTACTATTGATTTTGAATTTCCGAACTTTTGTGGC	TTTTGGTCTTCCATGTTACTATTGATTTTGAATTTCCGAACTTTTGTGGC	-	-	-	-	-	-	-	NA	NA	NA	NA	NA	NA	NA	NA	NA	NA	NA	NA	NA	NA	NA	NA	NA	NA	1	UU	NA
31	16	23	19O5	SCMHSP86	no data	GAAGAAGTGGATTAGCTTGTCTGCATTTTTGTATATATCCAGTGATTAAT	SCMHSP86	-	S.MANSONI HEAT SHOCK PROTEIN 86 MRNA, COMPLETE CDS	S.MANSONI HEAT SHOCK PROTEIN 86 MRNA, COMPLETE CDS	-	OM0023376-AOP	-	NA	NA	NA	NA	NA	NA	NA	NA	NA	NA	NA	NA	NA	NA	NA	NA	NA	NA	1	UU	NA
31	16	24	16G5	Contig6200	no data	GGTTCATATATGACTTGTATTATAAACGTAAAGCTATTTCTAAAGAGCTG	Contig6200	-	SIMILAR TO G10 PROTEIN (2E-24)	SIMILAR TO G10 PROTEIN (2E-24)	-	OM0023346-AOP	-	Smp_092380	g10 protein homolog, putative	144	NA	+	1	shisto12616b09.q1k, shisto2743h06.q1k	-, +	2	PF01125	G10	IPR001748	G10 protein	Cellular Component: nucleus (GO:0005634)	NA	NA	NA	NA	1	US	NA
31	18	24	16O5	Contig628	no data	CAATGACAATGTCTAAACTGACTTCGGAAAAGGTTGAAATCGGAGT	Contig628	-	SIMILAR TO PROTEASOME SUBUNIT ALPHA TYPE 4 (2E-90) POSSIBLE ANTISENSE	SIMILAR TO PROTEASOME SUBUNIT ALPHA TYPE 4 (2E-90) POSSIBLE ANTISENSE	-	OM0023346-AOP	-	Smp_070930, Smp_085520, Smp_071140	NA	NA	NA	+	3	shisto8763h08.q1k, shisto8921g12.q1k	-, +	2	NA	NA	NA	NA	NA	NA	NA	NA	NA	1	US	NA
31	3	28	1K5	AF045474	no data	CATTGTCTGATTACAATATCCAGAAAGAGTCCACTCTTCACTTGGTGTTG	AF045474	-	SCHISTOSOMA MANSONI POLYUBIQUITIN MRNA, PARTIAL CDS [POLY-A TAIL REMOVED]	SCHISTOSOMA MANSONI POLYUBIQUITIN MRNA, PARTIAL CDS [POLY-A TAIL REMOVED]	-	OM0023326-AOP	-	Smp_009580	ubiquitin (ribosomal protein L40), putative	228	228	+	1	shisto9562c04.q1k	-	1	PF00240	ubiquitin	IPR000626	Ubiquitin	Biological Process: protein modification process (GO:0006464)	SM00213	IPR000626	Ubiquitin	Biological Process: protein modification process (GO:0006464)	1	US	NA
31	12	28	2O5	Contig1252	no data	CGCTTCGTGAAAATAACGATGATGTTGTTAATGCTATTATGTCACTCACA	Contig1252	-	SIMILAR TO NASCENT POLYPEPTIDE ASSOCIATED COMPLEX ALPHA POLYPEPTIDE 2E-32	SIMILAR TO NASCENT POLYPEPTIDE ASSOCIATED COMPLEX ALPHA POLYPEPTIDE 2E-32	-	OM0023357-AOP	-	Smp_018530.1, Smp_018530.2	NA	NA	NA	+	2	shisto10563a04.q1k, shisto11037a12.p1k, shisto1425h04.p1k	-, +	3	NA	NA	NA	NA	NA	NA	NA	NA	NA	1	US	NA
31	18	28	3G5	Contig1556	no data	TGATTTGGAAATGCCAAATGCAGATGCTAACAAATCTGAAGAAAATGGAA	Contig1556	-	SIMILAR TO TELOMERASE-BINDING PROTEIN P23 (HSP90 CO-CHAPERONE) (PROGESTERONE REC	SIMILAR TO TELOMERASE-BINDING PROTEIN P23 (HSP90 CO-CHAPERONE) (PROGESTERONE REC	-	OM0023335-AOP	-	NA	NA	NA	NA	NA	NA	NA	NA	NA	NA	NA	NA	NA	NA	NA	NA	NA	NA	1	UU	NA
31	19	28	3K5	Contig1578	no data	TAGACCTTACGATGCAAATATTCGTGAAAACATTAACTGGTAAAACGAT	Contig1578	-	SIMILAR TO POLYUBIQUITIN (1E-122)	SIMILAR TO POLYUBIQUITIN (1E-122)	-	OM0023335-AOP	-	Smp_009580	ubiquitin (ribosomal protein L40), putative	228	228	+	1	shisto1576b01.q1k, shisto3066g10.q1k, shisto5195a05.q1k, shisto5226d01.p1k, shisto5226g06.p1k, shisto7434f05.q1k	-, +	6	PF00240	ubiquitin	IPR000626	Ubiquitin	Biological Process: protein modification process (GO:0006464)	SM00213	IPR000626	Ubiquitin	Biological Process: protein modification process (GO:0006464)	1	US	NA
31	21	28	3C17	Contig154	no data	TTCATTAAAACCCGGAATTCACTGAGATATGTAAAGCCAGACAACGTTGA	Contig154	-	SCHISTOSOMA MANSONI TRIOSE PHOSPHATE ISOMERASE (SGTPI) GENE EXON 6 (POSSIBLE ANT	SCHISTOSOMA MANSONI TRIOSE PHOSPHATE ISOMERASE (SGTPI) GENE EXON 6 (POSSIBLE ANT	-	OM0023335-AOP	-	Smp_003990, Smp_182970, Smp_073290, Smp_022050, Smp_190280, Smp_167710	NA	NA	NA	-, +	6	shisto12068d05.p1k, shisto2618b10.p1k, shisto9307e07.p1k	-, +	3	NA	NA	NA	NA	NA	NA	NA	NA	NA	1	UU	NA
31	23	28	3K17	Contig1583	no data	GTTGTCTCACTAAACAGTCTGCACACAGTAAAAGTTGTCAACATTCATT	Contig1583	-	UNKNOWN 747	UNKNOWN 747	hypothetical	OM0023335-AOP	-	NA	NA	NA	NA	NA	NA	NA	NA	NA	NA	NA	NA	NA	NA	NA	NA	NA	NA	1	UU	NA
31	24	28	3O17	Contig1604	no data	TTAATTACTTGTATCGATTGTTAAGGAGATTAGTGTTGGGTTGATACATG	Contig1604	-	SIMILAR TO NADH DEHYDROGENASE SUBUNIT 5 (1E-170)	SIMILAR TO NADH DEHYDROGENASE SUBUNIT 5 (1E-170)	-	OM0023335-AOP	-	NA	NA	NA	NA	NA	NA	NA	NA	NA	NA	NA	NA	NA	NA	NA	NA	NA	NA	1	UU	NA
31	26	28	4G5	Contig1909	no data	TATTTCGGAGGTTGAGATACCCAAGCACATCGATGATGAATACTTTCCGC	Contig1909	-	SIMILAR TO 60S RIBOSOMAL PROTEIN L6 (TAX-RESPONSIVE ENHANCER ELEMENT BINDING PRO	SIMILAR TO 60S RIBOSOMAL PROTEIN L6 (TAX-RESPONSIVE ENHANCER ELEMENT BINDING PRO	-	OM0023328-AOP	-	Smp_038510.2, Smp_038510.1	NA	NA	NA	+	2	shisto11767b03.q1kw, shisto12338b12.p1k, shisto2327g08.q1k, shisto7043a05.p1k	-, +	4	NA	NA	NA	NA	NA	NA	NA	NA	NA	1	US	NA
31	28	28	4O5	Contig1953	no data	GTATCGTTCGAGATCCCGTTCCAGGTCTTACTCCAATTCTAGACAAAAG	Contig1953	-	SIMILAR TO SRRP35 REGULATOR OF ALTERNATIVE SPLICING PROTEIN (5E-23) POSSIBLE ANT	SIMILAR TO SRRP35 REGULATOR OF ALTERNATIVE SPLICING PROTEIN (5E-23) POSSIBLE ANT	-	OM0023328-AOP	-	Smp_032320.1, Smp_032320.2, Smp_032320.4, Smp_032320.3, Smp_032320.6, Smp_032320.5	NA	NA	NA	+	6	shisto4847a05.p1k, shisto8838a04.q1k, shisto9152d03.p1k, shisto9152d03.p1kw, shisto9152h03.p1kw, shisto9155d03.p1k	-, +	6	NA	NA	NA	NA	NA	NA	NA	NA	NA	1	US	NA
32	4	23	18D5	Contig905	no data	CATATAGAATACAGTACAACATCTCCATATGGTTGCGGTCGCCCTGGT	Contig905	-	SIMILAR TO 40S RIBOSOMAL PROTEIN S9 (4E-70) POSSIBLE ANTISENSE	SIMILAR TO 40S RIBOSOMAL PROTEIN S9 (4E-70) POSSIBLE ANTISENSE	-	OM0023378-AOP	-	Smp_180000	40S ribosomal protein S9, putative	NA	NA	+	1	shistoFOS_38p12.p1kSP6, shisto4188d10.q1k, shisto3496h09.p1k, shisto5151b09.q1k, shistoFOS_39p23.p1kSP6, shistoFOS_49m09.p1kSP6, shisto1001h09.q1k, shisto10088d06.p1k, shisto10088d06.p1kw, shisto10156g01.p1k, shisto10168h03.p1k, shisto1023c02.p1k, shisto10263g07.q1k, shisto10278h03.p1k, shisto1027f04.p1k, shisto10323f06.q1k, shisto10328f12.q1k, shisto10388b10.p1k, shisto10492h02.q1k, shisto10584h…	-, +	266	NA	NA	NA	NA	NA	NA	NA	NA	NA	1	US	NA
32	13	23	19D5	SMU57003	no data	NA	SMU57003	-	SCHISTOSOMA MANSONI BREAST BASIC CONSERVED PROTEIN (BBC1) MRNA, COMPLETE CDS	SCHISTOSOMA MANSONI BREAST BASIC CONSERVED PROTEIN (BBC1) MRNA, COMPLETE CDS	-	OM0023337-AOP	-	NA	NA	NA	NA	NA	NA	NA	NA	NA	NA	NA	NA	NA	NA	NA	NA	NA	NA	1	UU	NA
33	24	4	83M4	SMLA2G06	CCCCCCCCTTCCCCCCCAAAAAAAAAAAAAAAAAAAAAAAAAAAAAAAAA	CCCCCCCCTTCCCCCCCAAAAAAAAAAAAAAAAAAAAAAAAAAAAAAAAA	-	-	-	-	-	-	-	NA	NA	NA	NA	NA	NA	NA	NA	NA	NA	NA	NA	NA	NA	NA	NA	NA	NA	1	UU	NA
33	27	15	470000	CD161591	TGTTGAGTATAAGGGTGAGCTTAAAGAAAAGATACCTGAAAGTGATCGTC	TGTTGAGTATAAGGGTGAGCTTAAAGAAAAGATACCTGAAAGTGATCGTC	P08418	HSP70_SCHMA	Heat shock 70 kDa homolog protein (HSP70) (Major surface antigen)	637	141 (355)	9e-33	-3	Smp_094680, Smp_106930.1, Smp_106930.2	NA	NA	NA	+	3	shisto4862f10.q1k, shisto5549g04.q1k, shisto7123f08.p1k, shisto8776c01.p1k, shisto9101h08.q1k	-, +	5	NA	NA	NA	NA	NA	NA	NA	NA	NA	9e-33	AS	NA
33	2	17	3.7e+17	CD121177	TCTTCTTGCAGAATATGTAGTTTTAATCAACCAGCCGGATAAGGATCCTT	TCTTCTTGCAGAATATGTAGTTTTAATCAACCAGCCGGATAAGGATCCTT	Q8IEP4	Q8IEP4_PLAF7	Hypothetical protein PF13_0035	1011	31.2 (69)	9.8	-2	NA	NA	NA	NA	NA	NA	NA	NA	NA	NA	NA	NA	NA	NA	NA	NA	NA	NA	1	UU	NA
33	18	23	1.9e+17	SCMSAT1A	no data	TTGTACACTGGTATGTTGGTGAAGGTATGGAAGAGGGTGAATTCTCTGAG	SCMSAT1A	-	SCHISTOSOMA MANSONI ALPHA-TUBULIN (SAT-1) MRNA, COMPLETE CDS	SCHISTOSOMA MANSONI ALPHA-TUBULIN (SAT-1) MRNA, COMPLETE CDS	-	OM0023390-AOP	-	Smp_103140, Smp_090120.1, Smp_090120.2	NA	NA	NA	+	3	shisto10240a04.q1k, shisto1929a10.q1k, shisto2845f08.p1k, shisto3435h04.q1k, shisto5002e09.q1k, shisto8874g12.q1k	-, +	6	NA	NA	NA	NA	NA	NA	NA	NA	NA	1	US	NA
33	20	23	19M16	SEG_SCMRRM	no data	TTTGAAATCTGAGAGTCGAGTTGTTTGGGAATGCAGCTCTAAGTGGGTG	SEG_SCMRRM	-	S.MANSONI 28S-LIKE RIBOSOMAL RNA, 5prime END	S.MANSONI 28S-LIKE RIBOSOMAL RNA, 5prime END	-	OM0023390-AOP	-	NA	NA	NA	NA	NA	NA	NA	NA	NA	NA	NA	NA	NA	NA	NA	NA	NA	NA	1	UU	NA
33	14	27	6A4	Contig2702	no data	CGGTTTCTTACGTGTTATACCCCATACTCCTTTAGTCTTTTAGTATTATC	Contig2702	-	UNKNOWN 1524	UNKNOWN 1524	-	OM0023391-AOP	-	NA	NA	NA	NA	NA	NA	NA	NA	NA	NA	NA	NA	NA	NA	NA	NA	NA	NA	1	UU	NA
33	16	27	60000	Contig2724	no data	TCAACAATTCAAGAAGTTCTGCATGGATTACCTACTGTACGTGAATATC	Contig2724	-	SIMILAR TO 26S PROTEASOME NON-ATPASE REGULATORY SUBUNIT 6 (4E-29)	SIMILAR TO 26S PROTEASOME NON-ATPASE REGULATORY SUBUNIT 6 (4E-29)	-	OM0023391-AOP	-	Smp_052870	26S proteasome non-atpase regulatory subunit, putative	391	391	+	1	shisto11045e11.p1k, shisto9494h09.p1k	-	2	PF01399	PCI	IPR000717	Proteasome component region PCI	-	SM00088	IPR000717	Proteasome component region PCI	-	1	US	NA
33	18	28	30000	Contig1630	no data	GAAGATCTAGATGAGGACGAGGAAGACGAGAATAAGGAGAAGAAGAAAAA	Contig1630	-	SIMILAR TO 90-KDA HEAT SHOCK PROTEIN (0.0)	SIMILAR TO 90-KDA HEAT SHOCK PROTEIN (0.0)	-	OM0023385-AOP	-	Smp_072330.1, Smp_072330.2	NA	NA	NA	+	2	shisto6752d11.p1k	-	1	NA	NA	NA	NA	NA	NA	NA	NA	NA	1	US	NA
33	24	28	3M16	Contig168	no data	TTAGTTTCATGGTATGATAATGAGTTTGGATACAGTTGCCGCGTAGTTG	Contig168	-	GLYCERALDEHYDE 3-PHOSPHATE DEHYDROGENASE (EC 1.2.1.12) (GAPDH) (MAJOR LARVAL SUR	GLYCERALDEHYDE 3-PHOSPHATE DEHYDROGENASE (EC 1.2.1.12) (GAPDH) (MAJOR LARVAL SUR	-	OM0023385-AOP	-	Smp_056970.3, Smp_056970.1, Smp_011590.1, Smp_011590.2, Smp_155060.2, Smp_106930.1, Smp_106930.2, Smp_060420.3, Smp_060420.4, Smp_060420.1, Smp_060420.2, Smp_060420.7, Smp_060420.5, Smp_060420.6, Smp_167230, Smp_083580, Smp_068720, Smp_061650	NA	NA	NA	-, +	18	shisto11234c03.q1k, shisto11238c04.q1k, shisto7417d05.p1k	-, +	3	NA	NA	NA	NA	NA	NA	NA	NA	NA	1	UU	NA
34	5	2	87F16	SMLC15B12	TGTAGTTAAAGAAATAATTCATGATCCGGGTCGTGGCGCTCCATTAGCCA	TGTAGTTAAAGAAATAATTCATGATCCGGGTCGTGGCGCTCCATTAGCCA	Q5DF88	Q5DF88_SCHJA	SJCHGC01239 protein	259	222 (566)	1e-56	3	Smp_051260	60S ribosomal protein L8, putative	259	NA	+	1	shisto4834f08.q1k, shisto5113g11.q1k, shisto6996g05.q1k	-, +	3	PF00181; PF03947	Ribosomal_L2; Ribosomal_L2_C	IPR002171	Ribosomal protein L2	Molecular Function: structural constituent of ribosome (GO:0003735), Cellular Component: intracellular (GO:0005622), Cellular Component: ribosome (GO:0005840), Biological Process: translation (GO:0006412)	NA	NA	NA	NA	1e-56	SS	NA
34	22	5	79J16	CONTIG8628	ACTGGCATTCCCGAGTCACCCGTTATCATCATGGTAGGCAAATCACCTAC	CTGGCATTCCCGAGTCACCCGTTATCATCATGGTAGGCAAATCACCTAC	O96035	O96035_CIOSA	PEM-2	820	31.2 (69)	9.8	-3	NA	NA	NA	NA	NA	NA	NA	NA	NA	NA	NA	NA	NA	NA	NA	NA	NA	NA	1	UU	NA
34	10	23	18J16	Contig856	no data	TTATTAGATGTGCTCACAGTCCAAGTTATATGTAGCTTCGTTCAATCAAG	Contig856	-	UNKNOWN 476 POSSIBLE ANTISENSE	UNKNOWN 476 POSSIBLE ANTISENSE	-	OM0023377-AOP	-	NA	NA	NA	NA	NA	NA	NA	NA	NA	NA	NA	NA	NA	NA	NA	NA	NA	NA	1	UU	NA
34	14	23	19F4	SMEIF5A	no data	GTGCTCTGAGAAAAGGCGGACATGTCGTTATGAAAGATCGTCCTTGTAA	SMEIF5A	-	S.MANSONI GENE FOR EUKARYOTIC TRANSLATION INITIATION FACTOR 5A	S.MANSONI GENE FOR EUKARYOTIC TRANSLATION INITIATION FACTOR 5A	-	OM0023338-AOP	-	Smp_039400	initiation factor 5a, putative	160	NA	+	1	shisto1728e10.q1k, shisto3098f07.p1k, shisto4482e01.q1k	-, +	3	PF00467; PF01287	eIF-5a; KOW	IPR001884; IPR005824	Eukaryotic initiation factor 5A hypusine (eIF-5A); KOW	-; Molecular Function: translation initiation factor activity (GO:0003743), Biological Process: translational initiation (GO:0006413)	NA	NA	NA	NA	1	US	NA
34	16	23	19N4	SMU30175	no data	GATAATATGAAAGGTCTTCAGCTGCTTGAAGAGGCCATAAAAATTGCTGG	SMU30175	-	SCHISOSOMA MANSONI ENOLASE TRANS-SPLICED MRNA, COMPLETE CDS [POLY-A TAIL REMOVED	SCHISOSOMA MANSONI ENOLASE TRANS-SPLICED MRNA, COMPLETE CDS [POLY-A TAIL REMOVED	-	OM0023338-AOP	-	Smp_024110	Enolase (2-phosphoglycerate dehydratase) (2-phospho-D-glycerate hydro-lyase), putative	NA	NA	+	1	shisto11936g06.q1k, shisto8698f08.p1k, shisto9811c11.q1k, shistoFOS_18i13.p1kSP6	-	4	NA	NA	NA	NA	NA	NA	NA	NA	NA	1	US	NA
34	5	24	14J16	Contig5678	no data	GTCCCGAATTAACAAATAAAATAATCGAACTTGTCAAACAAGCTAGTTCA	Contig5678	-	SIMILAR TO PUTATIVE HIGH MOBILITY GROUP-LIKE NUCLEAR PROTEIN 2 (2E-16) POSSIBLE	SIMILAR TO PUTATIVE HIGH MOBILITY GROUP-LIKE NUCLEAR PROTEIN 2 (2E-16) POSSIBLE	-	OM0023349-AOP	-	Smp_104660	ribosomal protein l7ae, putative	127	NA	+	1	shisto3612a04.q1k	-	1	PF01248	Ribosomal_L7Ae	IPR004038	Ribosomal protein L7Ae/L30e/S12e/Gadd45	-	NA	NA	NA	NA	1	US	NA
34	25	25	13J16	Contig5326	no data	CGATAAAAGAAACTCAAACCTGTCGTACTTTGATAATGATAGACCAACTA	Contig5326	-	UNKNOWN 3136	UNKNOWN 3136	CG13533 [Drosophila virilis]	OM0023366-AOP	-	Smp_042110.1, Smp_042110.2	NA	NA	NA	+	2	shisto12224f03.p1k, shisto1691d01.p1k, shisto2852g04.p1k, shisto4183f09.p1k, shisto9268e11.q1k, shisto9314b11.p1k	-, +	6	NA	NA	NA	NA	NA	NA	NA	NA	NA	1	US	NA
34	2	26	7J16	Contig32	no data	GTACCCTCCATGCCCCCTAAGTTTAGTGGAAATTACACATTGTTCTACTT	Contig32	-	ATP SYNTHASE D CHAIN, MITOCHONDRIAL (EC 3.6.3.14) (7E-15)	ATP SYNTHASE D CHAIN, MITOCHONDRIAL (EC 3.6.3.14) (7E-15)	-	OM0023334-AOP	-	NA	NA	NA	NA	NA	NA	NA	NA	NA	NA	NA	NA	NA	NA	NA	NA	NA	NA	1	UU	NA
34	24	26	10J4	Contig4248	no data	TTGTCACATCAAAACTTTACGAGCCCGGTTGTGTTAAACGGATTTATAAT	Contig4248	-	SIMILAR TO PROTEASOME (PROSOME, MACROPAIN) SUBUNIT, ALPHA TYPE, 3 (6E-41)	SIMILAR TO PROTEASOME (PROSOME, MACROPAIN) SUBUNIT, ALPHA TYPE, 3 (6E-41)	-	OM0023400-AOP	-	Smp_092280	proteasome subunit alpha type, putative	254	NA	+	1	shisto11502g11.q1k, shisto11943c01.p1k, shisto1394h09.p1k, shisto3678h03.p1k, shisto9490a07.p1k	-, +	5	PF00227	Proteasome	IPR001353	20S proteasome, A and B subunits	Molecular Function: threonine endopeptidase activity (GO:0004298), Cellular Component: proteasome core complex (sensu Eukaryota) (GO:0005839), Biological Process: ubiquitin-dependent protein catabolic process (GO:0006511)	NA	NA	NA	NA	1	US	NA
34	25	26	10N4	Contig427	no data	TGGTGTAATAGTCAGGGAATTGGATCTCCGAACACCTCGTTATTTACAAA	Contig427	-	SIMILAR TO METHIONINE ADENOSYLTRANSFERASE I, ALPHA 1E-11 (POSSIBLE ANTISENSE)	SIMILAR TO METHIONINE ADENOSYLTRANSFERASE I, ALPHA 1E-11 (POSSIBLE ANTISENSE)	-	OM0023400-AOP	-	Smp_002080, Smp_177280, Smp_079370.2, Smp_079370.1, Smp_143040, Smp_118860, Smp_136380.2, Smp_136380.1, Smp_054790.2, Smp_054790.1	NA	NA	NA	-, +	10	shisto694h03.p1k, shisto8125h11.p1k, shistopuc19N17f10.p1kw	-, +	3	NA	NA	NA	NA	NA	NA	NA	NA	NA	1	UU	NA
34	1	27	4B16	Contig2055	no data	TGTGTGATTTGGACTAGTTTTCTACGAGGAATGTTTTAGTGTTATTTTC	Contig2055	-	UNKNOWN 994	UNKNOWN 994	-	OM0023330-AOP	-	NA	NA	NA	NA	NA	NA	NA	NA	NA	NA	NA	NA	NA	NA	NA	NA	NA	NA	1	UU	NA
34	20	27	6F16	Contig2817	no data	CGTGGCAGTTCTCGAATGATTGTGGACGAAGCAAAACGTTCTTTACATG	Contig2817	-	SIMILAR TO T-COMPLEX PROTEIN 1, EPSILON SUBUNIT (TCP-1-EPSILON) 4E-52 POSSIBLE A	SIMILAR TO T-COMPLEX PROTEIN 1, EPSILON SUBUNIT (TCP-1-EPSILON) 4E-52 POSSIBLE A	-	OM0023394-AOP	-	Smp_063420	chaperonin containing t-complex protein 1, epsilon subunit, tcpe, putative	545	NA	+	1	shisto12560e07.p1k, shisto4118a06.p1k, shisto4739h02.q1k, shisto6734b05.p1k, shisto8914e07.p1k	-, +	5	PF00118	Cpn60_TCP1	IPR002423	Chaperonin Cpn60/TCP-1	Molecular Function: protein binding (GO:0005515), Molecular Function: ATP binding (GO:0005524), Biological Process: cellular protein metabolic process (GO:0044267)	NA	NA	NA	NA	1	US	NA
34	8	28	1N16	Contig1073	no data	GCGAATGCATTAAATTGAAATATAAGCTTCCTGATAAATTTTTTCCCGTT	Contig1073	-	SIMILAR TO NUCLEIC ACID BINDING PROTEIN (2E-15)	SIMILAR TO NUCLEIC ACID BINDING PROTEIN (2E-15)	-	OM0023369-AOP	-	NA	NA	NA	NA	NA	NA	NA	NA	NA	NA	NA	NA	NA	NA	NA	NA	NA	NA	1	UU	NA
34	14	28	2F16	Contig1376	no data	TTAGTTTGTTGGTATTTTTATGGTCATGGGTGTTCTGTAAGTGCAATGTT	Contig1376	-	SIMILAR TO NADH DEHYDROGENASE 4 (NADH DEHYDROGENASE SUBUNIT 4) 1E-169	SIMILAR TO NADH DEHYDROGENASE 4 (NADH DEHYDROGENASE SUBUNIT 4) 1E-169	-	OM0023384-AOP	-	NA	NA	NA	NA	NA	NA	NA	NA	NA	NA	NA	NA	NA	NA	NA	NA	NA	NA	1	UU	NA
34	15	28	2J16	Contig1398	no data	TATTGAACTATTCATGTGCAGTATATTAAAACGACAAGGGTATGGTGAGG	Contig1398	-	SIMILAR TO GTP-BINDING PROTEIN SARA 1E-78	SIMILAR TO GTP-BINDING PROTEIN SARA 1E-78	-	OM0023384-AOP	-	Smp_073590	GTP-binding protein-like protein	NA	NA	+	1	shisto10686g10.q1k, shisto11533e04.q1k, shisto3732g06.q1k, shisto5202h05.p1k, shisto9620g04.p1k	-, +	5	NA	NA	NA	NA	NA	NA	NA	NA	NA	1	US	NA
34	16	28	2N16	Contig1419	no data	CAGTCAAACAGTACGTATCAGATTAAGAACCAGACCAATTAATCCATCA	Contig1419	-	SIMILAR TO N(2), N(2)-DIMETHYLGUANOSINE TRNA METHYTRANSFERASE (EC 2.1.1.32) 2E-1	SIMILAR TO N(2), N(2)-DIMETHYLGUANOSINE TRNA METHYTRANSFERASE (EC 2.1.1.32) 2E-1	-	OM0023384-AOP	-	NA	NA	NA	NA	NA	NA	NA	NA	NA	NA	NA	NA	NA	NA	NA	NA	NA	NA	1	UU	NA
35	9	10	61G16	CONTIG11267	GTACCATGGTACTTACAAAATCCGCGTTTATAAATGAGTTGACGAACAAT	GTACCATGGTACTTACAAAATCCGCGTTTATAAATGAGTTGACGAACAAT	Q86EZ7	Q86EZ7_SCHJA	Clone ZZD126 mRNA sequence	253	442 (1136)	e-122	-2	Smp_101450	60S ribosomal protein L7, putative	NA	NA	-	1	shisto12711a03.q1k, shisto2552h04.q1k, shisto4439b05.q1k, shisto4457c06.p1k, shisto8433a11.p1k, shistopuc19N78b05.p1k	-, +	6	NA	NA	NA	NA	NA	NA	NA	NA	NA	1	UA	NA
35	10	13	51O16	CD185039	ATTGGTGGTATTGGTAACGTTGCAGGGGATTCTAAAAACGATCCTCCTAA	TTGGTGGTATTGGTAACGTTGCAGGGGATTCTAAAAACGATCCTCCTAA	Q94747	Q94747_SCHMA	Elongation factor 1-alpha	465	191 (485)	6e-48	3	Smp_099870.1, Smp_189530	NA	NA	NA	+	2	shisto3927f11.q1k, shisto9936c02.p1k	-, +	2	NA	NA	NA	NA	NA	NA	NA	NA	NA	6e-48	SS	NA
35	7	23	18O4	Contig797	no data	TTTGAAATCGAAGAAGGTGTAGACACTGAAATGATTTTCTGGGTTATCT	Contig797	-	SIMILAR TO TRANSLOCON-ASSOCIATED PROTEIN, ALPHA SUBUNIT PRECURSOR (TRAP-ALPHA) (	SIMILAR TO TRANSLOCON-ASSOCIATED PROTEIN, ALPHA SUBUNIT PRECURSOR (TRAP-ALPHA) (	-	OM0023383-AOP	-	Smp_071600.2, Smp_071600.1	NA	NA	NA	+	2	shisto1283d01.p1k, shisto589f08.q1k, shisto1975f05.q1k, shisto2643a06.p1k, shisto5219a09.q1k, shisto5442c02.q1k, shisto8227d10.q1k, shisto8903h02.q1k, shisto1854e03.p1k, shisto11806d07.q1k, shisto7829c04.q1k, shisto10829g01.q1k, shisto11947g08.q1k, shisto10006f09.q1k, shisto10143h07.p1k, shisto10171h06.q1k, shisto10180b10.p1k, shisto10244d04.p1k, shisto10282h07.q1k, shisto10319b09.p1k, shisto1034…
35	14	23	19G4	SCMSGTPI05	no data	TTTGTTGGTCTTCTTCTTCTTACGCTTCTAAATTTTGTCTCTTCTCATGT	SCMSGTPI05	-	SCHISTOSOMA MANSONI TRIOSE PHOSPHATE ISOMERASE (SGTPI) GENE EXON 6, COMPLETE CDS	SCHISTOSOMA MANSONI TRIOSE PHOSPHATE ISOMERASE (SGTPI) GENE EXON 6, COMPLETE CDS	-	OM0023390-AOP	-	NA	NA	NA	NA	NA	NA	NA	NA	NA	NA	NA	NA	NA	NA	NA	NA	NA	NA	1	UU	NA
35	17	23	19C16	SCMRRNAA	no data	CATTATTAGACGGAAAGACCCCAAGAGCTTTTTTTGTGTTAAATTTGTTT	SCMRRNAA	-	SCHISTOSOMA MANSONI RIBOSOMAL RNA	SCHISTOSOMA MANSONI RIBOSOMAL RNA	-	OM0023390-AOP	-	NA	NA	NA	NA	NA	NA	NA	NA	NA	NA	NA	NA	NA	NA	NA	NA	NA	NA	1	UU	NA
35	10	24	15O4	Contig5968	no data	NA	Contig5968	-	UNKNOWN 3552	UNKNOWN 3552	hypothetical protein [Plasmodium yoelii yoelii]	OM0023348-AOP	-	NA	NA	NA	NA	NA	NA	NA	NA	NA	NA	NA	NA	NA	NA	NA	NA	NA	NA	1	UU	NA
35	14	24	15O16	Contig5973	no data	GTGATACCAAAATCTTGTAGAAGTGCACAATCGAGTAAAGGAGAGCCATG	Contig5973	-	UNKNOWN 3556	UNKNOWN 3556	ubiquitin [Ciona savignyi]	OM0023348-AOP	-	Smp_017280	ubiquitin, putative	153	153	-	1	shisto3694f03.p1k, shisto6824d03.p1k	-, +	2	PF00240; PF01599	Ribosomal_S27; ubiquitin	IPR000626; IPR002906	Ribosomal protein S27a; Ubiquitin	Biological Process: protein modification process (GO:0006464); Molecular Function: structural constituent of ribosome (GO:0003735), Cellular Component: intracellular (GO:0005622), Cellular Component: ribosome (GO:0005840), Biological Process: translation (GO:0006412)	SM00213	IPR000626	Ubiquitin	Biological Process: protein modification process (GO:0006464)	1	UA	NA
35	6	25	11C16	Contig4481	no data	CTCGAGCGTCGCTTGGTTATTATGGATTGATTTGTGCTATGGCTT	Contig4481	-	SIMILAR TO CYTOCHROME C OXIDASE POLYPEPTIDE I (EC 1.9.3.1) 3E-08	SIMILAR TO CYTOCHROME C OXIDASE POLYPEPTIDE I (EC 1.9.3.1) 3E-08	-	OM0023365-AOP	-	Smp_110870, Smp_184920, Smp_184440, Smp_184550	NA	NA	NA	+	4	shisto10972h04.p1k	+	1	NA	NA	NA	NA	NA	NA	NA	NA	NA	1	US	NA
35	25	25	13K16	Contig5249	no data	GTATAGAGACTCCACTGATGGTAAAGCTCCAGTCATAGATTGTTTGC	Contig5249	-	SIMILAR TO RIBOSOMAL PROTEIN L27A (3E-53)	SIMILAR TO RIBOSOMAL PROTEIN L27A (3E-53)	-	OM0023332-AOP	-	Smp_132300	kif-3, putative	766	766	+	1	shisto11547g09.p1k, shisto12680a01.q1k, shisto1915d04.p1k, shisto6814f03.p1k, shisto8871g07.p1k, shisto9236b02.p1k	-, +	6	PF00225; PF00256	Kinesin; L15	IPR001196; IPR001752	Kinesin, motor region; Ribosomal protein L15	Molecular Function: microtubule motor activity (GO:0003777), Molecular Function: ATP binding (GO:0005524), Cellular Component: microtubule associated complex (GO:0005875), Biological Process: microtubule-based movement (GO:0007018); Molecular Function: structural constituent of ribosome (GO:0003735), Cellular Component: intracellular (GO:0005622), Cellular Component: ribosome (GO:0005840), Biolog…	SM00129	IPR001752	Kinesin, motor region	Molecular Function: microtubule motor activity (GO:0003777), Molecular Function: ATP binding (GO:0005524), Cellular Component: microtubule associated complex (GO:0005875), Biological Process: microtubule-based movement (GO:0007018)	1	US	NA
35	7	27	5K4	Contig2400	no data	GTTCTGATGAGTCCATCCCATTTAAACCGTACAGTCCTTTTCCAAAACC	Contig2400	-	UNKNOWN 1250	UNKNOWN 1250	·CG9172-PA [Drosophila melanogaster]·	OM0023341-AOP	-	Smp_092490.2, Smp_092490.1	NA	NA	NA	+	2	shisto7486e08.p1k	+	1	NA	NA	NA	NA	NA	NA	NA	NA	NA	1	US	NA
35	4	28	1O4	AY118110.1	no data	CCAGTTTTTCTTACCATTCATTGCTTCCACTTAATAAATTTTGTTCACTA	AY118110.1	-	SCHISTOSOMA MANSONI IMMUNOPHILIN FK506 BINDING PROTEIN FKBP12 MRNA, COMPLETE CDS	SCHISTOSOMA MANSONI IMMUNOPHILIN FK506 BINDING PROTEIN FKBP12 MRNA, COMPLETE CDS	-	OM0023389-AOP	-	NA	NA	NA	NA	NA	NA	NA	NA	NA	NA	NA	NA	NA	NA	NA	NA	NA	NA	1	UU	NA
35	8	28	1O16	AY168137.1	no data	TAAAATATTTGGACGGTCTTGATGAGAACAACGAGGAAGAAGTGTTTGGG	AY168137.1	-	SCHISTOSOMA MANSONI LEUCINE-RICH PROTEIN (SMV0119) MRNA, COMPLETE CDS	SCHISTOSOMA MANSONI LEUCINE-RICH PROTEIN (SMV0119) MRNA, COMPLETE CDS	-	OM0023389-AOP	-	Smp_010940.1, Smp_010940.4, Smp_010940.3	NA	NA	NA	+	3	shisto11949g08.p1k, shisto1237a02.q1k, shisto4472f07.q1k, shisto7411e05.p1k, shisto8199g05.p1k	-, +	5	NA	NA	NA	NA	NA	NA	NA	NA	NA	1	US	NA
35	10	28	2G4	Contig1295	no data	GCTACTCTGAAATTGGATGTGGAGTTAATCGATATATTATGACTCATCCC	Contig1295	-	SIMILAR TO IMMUNOPHILIN FK506 BINDING PROTEIN FKBP12 (1E-55)	SIMILAR TO IMMUNOPHILIN FK506 BINDING PROTEIN FKBP12 (1E-55)	-	OM0023353-AOP	-	Smp_079230	immunophilin FK506 binding protein FKBP12, putative	108	NA	+	1	shisto1118f10.q1k, shisto2913h01.p1k, shisto2913h04.p1k, shisto3112f03.q1k, shisto7961a11.p1k	-, +	5	PF00254	FKBP_C	IPR001179	Peptidyl-prolyl cis-trans isomerase, FKBP-type	Biological Process: protein folding (GO:0006457)	NA	NA	NA	NA	1	US	NA
35	18	28	3G4	Contig1641	no data	TGAGTGCACGAGTAATAAATTTATAGTTTGGTGGATAACGTACCTTTTGT	Contig1641	-	SIMILAR TO CYTOCHROME C OXIDASE POLYPEPTIDE I (EC 1.9.3.1) 4E-31	SIMILAR TO CYTOCHROME C OXIDASE POLYPEPTIDE I (EC 1.9.3.1) 4E-31	-	OM0023385-AOP	-	NA	NA	NA	NA	NA	NA	NA	NA	NA	NA	NA	NA	NA	NA	NA	NA	NA	NA	1	UU	NA
36	15	23	19L4	SMSSSRRNA	no data	GCCGCTCGACTGATGCTGAGAAGATGACCTAATTTGACTATTTAGAGGAA	SMSSSRRNA	-	SCHISTOSOMA MANSONI SMALL SUBUNIT RRNA GENE	SCHISTOSOMA MANSONI SMALL SUBUNIT RRNA GENE	-	OM0023338-AOP	-	NA	NA	NA	NA	NA	NA	NA	NA	NA	NA	NA	NA	NA	NA	NA	NA	NA	NA	1	UU	NA
37	15	6	75I15	CONTIG6686	GAACTATCAAACTTTTTCCCATCCATGAGGGTACCAGTGTAATGAACAAC	GAACTATCAAACTTTTTCCCATCCATGAGGGTACCAGTGTAATGAACAAC	Q8MTB4	Q8MTB4_SCHMA	Immunophilin FK506 binding protein FKBP12	108	225 (573)	4e-58	1	Smp_079230	immunophilin FK506 binding protein FKBP12, putative	108	NA	-	1	shisto2934d02.q1k, shisto3303d05.p1k, shisto4571e01.q1k, shisto5067b07.q1k	-, +	4	PF00254	FKBP_C	IPR001179	Peptidyl-prolyl cis-trans isomerase, FKBP-type	Biological Process: protein folding (GO:0006457)	NA	NA	NA	NA	4e-58	SA	NA
37	27	21	27M3	CD080892	CGTGTTGTCTGGTGGAAGTACGATGTATCCTGGTATTGCTGACCGTATGC	CGTGTTGTCTGGTGGAAGTACGATGTATCCTGGTATTGCTGACCGTATGC	P53470	ACT1_SCHMA	Actin-1	376	186 (472)	4e-46	1	Smp_046590.2, Smp_046600	NA	NA	NA	+	2	shisto3493b05.p1k, shisto7300b06.p1k	-	2	NA	NA	NA	NA	NA	NA	NA	NA	NA	4e-46	SS	NA
37	5	24	14I15	Contig550	no data	TCCATCTGAACTTGATTACTTTCCTACCGTTTCATATCTACTTACTTCCG	Contig550	-	SIMILAR TO Y-BOX BINDING PROTEIN HOMOLOG (3E-64) POSSIBLE ANTISENSE	SIMILAR TO Y-BOX BINDING PROTEIN HOMOLOG (3E-64) POSSIBLE ANTISENSE	-	OM0023367-AOP	-	NA	NA	NA	NA	NA	NA	NA	NA	NA	NA	NA	NA	NA	NA	NA	NA	NA	NA	1	UU	NA
37	23	28	3I15	Contig1571	no data	TCTAATGTTGTGATACACAAATTAAAGTTGGATAAAGATCGTCGTTCAT	Contig1571	-	SIMILAR TO RIBOSOMAL PROTEIN L26 (2E-39) POSSIBLE ANTISENSE	SIMILAR TO RIBOSOMAL PROTEIN L26 (2E-39) POSSIBLE ANTISENSE	-	OM0023335-AOP	-	Smp_098960	60S ribosomal protein L26, putative	142	NA	+	1	shisto12491g03.q1k, shisto9219h10.q1k, shisto9593e07.p1k	-, +	3	PF00467	KOW	IPR005824	KOW	-	NA	NA	NA	NA	1	US	NA
37	24	28	3M15	Contig1593	no data	TGTATGGAGGTAGTGTTTCTGTATTTGATGGCTTACTAAGTTACATTTAT	Contig1593	-	SIMILAR TO ATPASE SUBUNIT 6 (3E-90)	SIMILAR TO ATPASE SUBUNIT 6 (3E-90)	-	OM0023335-AOP	-	NA	NA	NA	NA	NA	NA	NA	NA	NA	NA	NA	NA	NA	NA	NA	NA	NA	NA	1	UU	NA
38	11	3	85J3	SMLA52H01	CCCCCCCCTCCCCCCTTTTTTTGTTTTTTTTTTTTTTTTTTTTTTTTTTT	CCCCCCCCTCCCCCCTTTTTTTGTTTTTTTTTTTTTTTTTTTTTTTTTTT	-	-	-	-	-	-	-	NA	NA	NA	NA	NA	NA	NA	NA	NA	NA	NA	NA	NA	NA	NA	NA	NA	NA	1	UU	NA
38	22	4	83F3	SMLA22G01	CCCCCGGCGGAGTTTTTTTTTTTTTTTTTTTTTTAGGGAAGGAAAAAAAA	CCCCCGGCGGAGTTTTTTTTTTTTTTTTTTTTTTAGGGAAGGAAAAAAAA	O75229	O75229_HUMAN	R31449_3 (Fragment)	813	43.1 (100)	0.019	-2	NA	NA	NA	NA	NA	NA	NA	NA	NA	NA	NA	NA	NA	NA	NA	NA	NA	NA	1	UU	NA
38	1	17	37B15	CD120345	GTTCTGCATTGGAGAAGATGACACAGATCATGTTTGAGACGTTTAATGTG	GTTCTGCATTGGAGAAGATGACACAGATCATGTTTGAGACGTTTAATGTG	P53470	ACT1_SCHMA	Actin-1	376	138 (347)	6e-32	3	Smp_183710, Smp_046590.2, Smp_046600	NA	NA	NA	+	3	shisto12391f01.q1k, shisto3923a07.p1k, shisto6932d10.p1k, shisto7397h10.p1k	-, +	4	NA	NA	NA	NA	NA	NA	NA	NA	NA	6e-32	SS	NA
38	28	23	20J15	Contig5242d	no data	NA	-	-	-	-	-	-	-	NA	NA	NA	NA	NA	NA	NA	NA	NA	NA	NA	NA	NA	NA	NA	NA	NA	NA	1	UU	NA
38	15	25	12F15	Contig5027	no data	GGAGTTCTCAGTAGCATATATAAACATGCAGCAGGTATTGAAGAAAGCT	Contig5027	-	SIMILAR TO HEPATITIS B VIRUS X INTERACTING PROTEIN (HBX-INTERACTING PROTEIN) 2E-	SIMILAR TO HEPATITIS B VIRUS X INTERACTING PROTEIN (HBX-INTERACTING PROTEIN) 2E-	-	OM0023358-AOP	-	NA	NA	NA	NA	NA	NA	NA	NA	NA	NA	NA	NA	NA	NA	NA	NA	NA	NA	1	UU	NA
38	13	28	2B15	Contig1440	no data	GCCTGTTGTTTATTCCGAAACAGTGGCACTATTAACGATTATGTTAAT	Contig1440	-	SIMILAR TO SIGNAL SEQUENCE RECEPTOR, DELTA (9E-17)	SIMILAR TO SIGNAL SEQUENCE RECEPTOR, DELTA (9E-17)	-	OM0023375-AOP	-	Smp_089000.2, Smp_089000.3	NA	NA	NA	+	2	shisto4989g07.p1k, shisto9190d06.p1k, shisto9283c01.q1k	-, +	3	NA	NA	NA	NA	NA	NA	NA	NA	NA	1	US	NA
38	15	28	2J15	Contig1484	no data	GCTTGAGATCCACTGAGAATGAGTGATCAATAAATACAGGTTGGTATACG	Contig1484	-	SIMILAR TO RIBOSOMAL PROTEIN L32 (3E-26)	SIMILAR TO RIBOSOMAL PROTEIN L32 (3E-26)	-	OM0023375-AOP	-	NA	NA	NA	NA	NA	NA	NA	NA	NA	NA	NA	NA	NA	NA	NA	NA	NA	NA	1	UU	NA
38	18	28	3F3	Contig1807	no data	CAGTTTCGTTCATGGCTCCTTTCTCAACCGTATTCATTTAAATCTGGT	Contig1807	-	UNKNOWN 842	UNKNOWN 842	hypothetical	OM0023327-AOP	-	Smp_000140.1, Smp_000140.2	NA	NA	NA	+	2	shisto1893g01.q1k, shisto7537c11.q1k, shisto8260e09.p1k, shisto9163e10.q1k	-, +	4	NA	NA	NA	NA	NA	NA	NA	NA	NA	1	US	NA
38	19	28	3J3	Contig183	no data	CAAATCTAACTGTGAAGGAACTGTAATATGTTGCTTTTAATAAAGGTTTC	Contig183	-	SIMILAR TO RIBOSOMAL PROTEIN L38 (9E-08)	SIMILAR TO RIBOSOMAL PROTEIN L38 (9E-08)	-	OM0023327-AOP	-	NA	NA	NA	NA	NA	NA	NA	NA	NA	NA	NA	NA	NA	NA	NA	NA	NA	NA	1	UU	NA
38	22	28	3F15	Contig1812	no data	GAAATAGGTCTGGTCACGAAGACCGTTATCGTACAAGATCCCATTCTTC	Contig1812	-	SIMILAR TO RNA-BINDING PROTEIN 1 (1E-14) POSSIBLE ANTISENSE	SIMILAR TO RNA-BINDING PROTEIN 1 (1E-14) POSSIBLE ANTISENSE	-	OM0023327-AOP	-	Smp_071640.2, Smp_071640.1	NA	NA	NA	+	2	shisto11225f09.q1k, shisto11428e08.p1k, shisto12933a05.q1k, shisto5575a04.q1k	-, +	4	NA	NA	NA	NA	NA	NA	NA	NA	NA	1	US	NA
39	8	6	75C3	CONTIG6468	TATAATGGTGGAGGCGGTGGTGGTGGTGGTGGAAGAGATCGTGACAATAA	TATAATGGTGGAGGCGGTGGTGGTGGTGGTGGAAGAGATCGTGACAATAA	Q86EQ4	Q86EQ4_SCHJA	Clone ZZD1536 mRNA sequence	192	82.0 (201)	8e-15	2	NA	NA	NA	NA	NA	NA	NA	NA	NA	NA	NA	NA	NA	NA	NA	NA	NA	NA	8e-15	SU	NA
39	11	6	75O3	CONTIG6853	AATGCAAGATCCAATTCTCATCTCAGCAACAAGCGCTCTTTGAATGCTTG	TGCAAGATCCAATTCTCATCTCAGCAACAAGCGCTCTTTGAATGCTTG	Q5C1B7	Q5C1B7_SCHJA	SJCHGC09454 protein (Fragment)	208	158 (399)	2e-37	-2	Smp_036270.10, Smp_036270.11, Smp_036270.3, Smp_036270.4, Smp_036270.1, Smp_036270.2, Smp_036270.8	NA	NA	NA	+	7	shisto11374g04.q1k, shisto5505h03.q1k, shisto5842b06.q1k, shisto7074e03.q1k, shisto7522c07.q1k, shisto9044h10.p1k	-, +	6	NA	NA	NA	NA	NA	NA	NA	NA	NA	2e-37	AS	NA
39	11	23	18O15	Contig713	no data	CAACCAAGAGCTAATCATTTAATATTTAGAACAATGCCTGATCGTCTTC	Contig713	-	SIMILAR TO 2-OXOGLUTARATE DEHYDROGENASE E1 COMPONENT, MITOCHONDRIAL PRECURSOR (E	SIMILAR TO 2-OXOGLUTARATE DEHYDROGENASE E1 COMPONENT, MITOCHONDRIAL PRECURSOR (E	-	OM0023379-AOP	-	Smp_044970	2-oxoglutarate dehydrogenase, putative	NA	NA	+	1	shisto12505e09.q1k, shisto4896h05.q1k, shisto4971c03.p1k	-	3	NA	NA	NA	NA	NA	NA	NA	NA	NA	1	US	NA
39	18	23	19G15	SCMCPI	no data	CCTAGAGAACCGTCTGCAGAGGAAAAAGAAAAACTTAAGACTCTGTTAG	SCMCPI	-	SCHISTOSOMA MANSONI CYSTEINE PROTEINASE INHIBITOR MRNA	SCHISTOSOMA MANSONI CYSTEINE PROTEINASE INHIBITOR MRNA	-	OM0023376-AOP	-	Smp_006390	cystatin B, putative	101	NA	+	1	shisto2346f09.p1k	+	1	PF00031	Cystatin	IPR000010	Proteinase inhibitor I25, cystatin	Molecular Function: cysteine protease inhibitor activity (GO:0004869)	NA	NA	NA	NA	1	US	NA
39	18	24	16O3	Contig6278	no data	GTTGCTTCTTCGTGGAGGGGGATGTTAATTTTGTTCATTTAACTTAACAA	Contig6278	-	SIMILAR TO UBIQUITIN C-TERMINAL EXTENSION PROTEIN UBICEP86 (1E-09) POSSIBLE ANTI	SIMILAR TO UBIQUITIN C-TERMINAL EXTENSION PROTEIN UBICEP86 (1E-09) POSSIBLE ANTI	-	OM0023346-AOP	-	NA	NA	NA	NA	NA	NA	NA	NA	NA	NA	NA	NA	NA	NA	NA	NA	NA	NA	1	UU	NA
39	17	25	12O15	Contig481	no data	GAAAACCCCTGTGGAACACAAAAAATAAATTATTGACCAAACTTCTTGG	Contig481	-	SIMILAR TO 60S RIBOSOMAL PROTEIN L34 4E-31 POSSIBLE ANTISENSE	SIMILAR TO 60S RIBOSOMAL PROTEIN L34 4E-31 POSSIBLE ANTISENSE	-	OM0023359-AOP	-	NA	NA	NA	NA	NA	NA	NA	NA	NA	NA	NA	NA	NA	NA	NA	NA	NA	NA	1	UU	NA
39	5	27	5C3	Contig2257	no data	GTGGGACCCTAACTTAAGTGGCTCTGTTTGGTGTAAAACTGGTCAAG	Contig2257	-	UNKNOWN 1134	UNKNOWN 1134	-	OM0023342-AOP	-	NA	NA	NA	NA	NA	NA	NA	NA	NA	NA	NA	NA	NA	NA	NA	NA	NA	NA	1	UU	NA
39	4	28	1O3	AF130787	no data	NA	AF130787	-	SCHISTOSOMA MANSONI CYTOCHROME C OXIDASE SUBUNIT 1 (COI) GENE, PARTIAL CDS; TRNA	SCHISTOSOMA MANSONI CYTOCHROME C OXIDASE SUBUNIT 1 (COI) GENE, PARTIAL CDS; TRNA	-	OM0023326-AOP	-	NA	NA	NA	NA	NA	NA	NA	NA	NA	NA	NA	NA	NA	NA	NA	NA	NA	NA	1	UU	NA
39	11	28	2K3	Contig123	no data	NA	Contig123	-	ACTIN (6E-78). (POSSIBLE ANTISENSE)	ACTIN (6E-78). (POSSIBLE ANTISENSE)	-	OM0023357-AOP	-	NA	NA	NA	NA	NA	NA	NA	NA	NA	NA	NA	NA	NA	NA	NA	NA	NA	NA	1	UU	NA
39	13	28	2C15	Contig1192	no data	GTGTACTAAACCTATTTCACATGACATTAAATCGCTACGCACTCCAACT	Contig1192	-	UNKNOWN 590	UNKNOWN 590	hypothetical	OM0023357-AOP	-	Smp_008770	Mitochondrial 28S ribosomal protein S32 (S32mt) (MRP-S32), putative	NA	NA	+	1	shisto10710a04.p1k, shisto2469a04.q1k, shisto4989h02.q1k, shisto5815d03.p1k, shisto7713d01.q1k	-, +	5	NA	NA	NA	NA	NA	NA	NA	NA	NA	1	US	NA
40	10	2	88L3	SMLC27F12A	TTTTCGGGTTGGAAATTGGAACCCCCCTTTCATTAGAATTTTAAAAGGTA	TTTTCGGGTTGGAAATTGGAACCCCCCTTTCATTAGAATTTTAAAAGGTA	P20287	G3P_SCHMA	Glyceraldehyde-3-phosphate dehydrogenase (EC 1.2.1.12) (GAPDH) (Major	338	37.4 (85)	0.55	1	NA	NA	NA	NA	NA	NA	NA	NA	NA	NA	NA	NA	NA	NA	NA	NA	NA	NA	1	UU	NA
40	22	26	10D3	Contig4301	no data	TGCTCAGTTAAAAAAGGGAAACCAGAACTAAGGAAAAAAGTGTTGTATGC	Contig4301	-	SIMILAR TO 60S RIBOSOMAL PROTEIN L23 (5E-42)	SIMILAR TO 60S RIBOSOMAL PROTEIN L23 (5E-42)	-	OM0023402-AOP	-	Smp_007900.2, Smp_007900.1	NA	NA	NA	+	2	shisto12119b10.p1k, shisto12780e08.q1k, shisto4456f06.p1k, shisto506a04.p1k, shisto6834b12.p1k, shisto7359c05.q1k	-, +	6	NA	NA	NA	NA	NA	NA	NA	NA	NA	1	US	NA
40	25	26	10P3	Contig4367	no data	GGAATAATCGTCAATAAGCGTGTCGGTAATCGAATAATTCCGAAACGAAT	Contig4367	-	SIMILAR TO RIBOSOMAL PROTEIN L21 (4E-49)	SIMILAR TO RIBOSOMAL PROTEIN L21 (4E-49)	-	OM0023402-AOP	-	Smp_149250, Smp_022560.2, Smp_022560.1	NA	NA	NA	+	3	shisto11649c06.q1k, shisto1931f11.q1k, shisto9250g02.p1k	+	3	NA	NA	NA	NA	NA	NA	NA	NA	NA	1	US	NA
40	5	28	1D15	Contig1105	no data	GGGTTATAGGCATGAATGTATAAAGTAGAAAATTGTATGTTTGATTCTGT	Contig1105	-	SIMILAR TO NADH DEHYDROGENASE SUBUNIT 1 (1E-65)	SIMILAR TO NADH DEHYDROGENASE SUBUNIT 1 (1E-65)	-	OM0023401-AOP	-	NA	NA	NA	NA	NA	NA	NA	NA	NA	NA	NA	NA	NA	NA	NA	NA	NA	NA	1	UU	NA
40	6	28	1H15	Contig1127	no data	CTAAACAATATCTTCATCATTGGAAAGTCAAACAAACCATGGATTTCTCT	Contig1127	-	SIMILAR TO RIBOSOMAL PROTEIN S4 (1E-104)	SIMILAR TO RIBOSOMAL PROTEIN S4 (1E-104)	-	OM0023401-AOP	-	Smp_011570.2, Smp_011570.1	NA	NA	NA	+	2	shisto1473e04.q1k, shisto12558a11.p1k, shisto1937f12.p1k, shisto3052d02.q1k, shisto5344e09.q1k	-, +	5	NA	NA	NA	NA	NA	NA	NA	NA	NA	1	US	NA
40	7	28	1L15	Contig1149	no data	TCGAAGCACCACTTTTCTGATGAGAATTCTGATTATTCTTCTGAACG	Contig1149	-	UNKNOWN 578	UNKNOWN 578	hypothetical	OM0023401-AOP	-	NA	NA	NA	NA	NA	NA	NA	NA	NA	NA	NA	NA	NA	NA	NA	NA	NA	NA	1	UU	NA
40	19	28	3L3	Contig1840	no data	GTTGCTCCTAGAGCATGATTGCATAAATAAACTATTATCCATTGGACTTC	Contig1840	-	SIMILAR TO 40S RIBOSOMAL PROTEIN S26 (3E-20)	SIMILAR TO 40S RIBOSOMAL PROTEIN S26 (3E-20)	-	OM0023327-AOP	-	NA	NA	NA	NA	NA	NA	NA	NA	NA	NA	NA	NA	NA	NA	NA	NA	NA	NA	1	UU	NA
41	10	2	88I2	SMLC26H04	TTGTGGTGGGGACACACCTTTTTTTTTTTTTTTTTTTTTTTCCCCAAAAA	TTGTGGTGGGGACACACCTTTTTTTTTTTTTTTTTTTTTTTCCCCAAAAA	Q5DCD8	Q5DCD8_SCHJA	SJCHGC06278 protein	392	66.6 (161)	1e-09	3	NA	NA	NA	NA	NA	NA	NA	NA	NA	NA	NA	NA	NA	NA	NA	NA	NA	NA	1	UU	NA
41	18	23	1.9e+15	SCMSAT	no data	TGATGAAGGGGATAGGTGTATGTTCTGTCCTCTTGTTTTTGAATAGTGGT	SCMSAT	-	MITOCHONDRION SCHISTOSOMA MANSONI MINISATELLITE DNA REGION	MITOCHONDRION SCHISTOSOMA MANSONI MINISATELLITE DNA REGION	-	OM0023390-AOP	-	NA	NA	NA	NA	NA	NA	NA	NA	NA	NA	NA	NA	NA	NA	NA	NA	NA	NA	1	UU	NA
41	14	26	9A2	Contig3770	no data	GTACTCAGTATGGATTGGTGGTTCTATTTTGGCTTCATTATCAACATTCC	Contig3770	-	SIMILAR TO ACTIN 1 (3E-75) POSSIBLE ANTISENSE	SIMILAR TO ACTIN 1 (3E-75) POSSIBLE ANTISENSE	-	OM0023370-AOP	-	Smp_161920, Smp_161930, Smp_046590.2, Smp_046600	NA	NA	NA	+	4	shisto11406a04.p1k, shisto5474a05.q1k	-, +	2	NA	NA	NA	NA	NA	NA	NA	NA	NA	1	US	NA
42	25	3	86J14	SMLA8E05	TCTTCAATCACAAAGATGTGCCTAAGGGAGAATATGTTGTCCGGTTTTAT	TCTTCAATCACAAAGATGTGCCTAAGGGAGAATATGTTGTCCGGTTTTAT	Q5DGE4	Q5DGE4_SCHJA	SJCHGC06303 protein	163	212 (539)	1e-53	3	Smp_089000.2, Smp_089000.3, Smp_089000.1	NA	NA	NA	+	3	shisto2510g09.q1k	-	1	NA	NA	NA	NA	NA	NA	NA	NA	NA	1e-53	SS	NA
42	1	6	74F2	CONTIG6016	CGATAAGAACACGTCTTTGGTCAATTATTTCTACGATGATTGCCACCTTT	CGATAAGAACACGTCTTTGGTCAATTATTTCTACGATGATTGCCACCTTT	Q5DA76	Q5DA76_SCHJA	SJCHGC06827 protein	144	257 (656)	8e-68	-3	Smp_175740.2, Smp_175740.1	NA	NA	NA	-	2	shisto6956b01.p1k	-	1	NA	NA	NA	NA	NA	NA	NA	NA	NA	8e-68	AA	NA
42	8	6	75B2	CONTIG6432	AACGTTATTAATAGGACGAAAATTAAACTCCCGAAAAATCCACCAAAGAT	CGTTATTAATAGGACGAAAATTAAACTCCCGAAAAATCCACCAAAGAT	Q5Q995	Q5Q995_IXOSC	Putative secreted salivary gland peptide	135	79.3 (194)	3e-14	-1	Smp_100140	Keratinocytes-associated protein 2 (KCP-2), putative	NA	NA	-	1	shisto1087d01.q1k, shisto12357a06.p1k, shisto1269c03.q1k, shisto2823b06.p1k, shisto2833e02.p1k, shisto8221a05.p1k	-, +	6	NA	NA	NA	NA	NA	NA	NA	NA	NA	3e-14	AA	NA
42	13	23	19B2	SMA311627	no data	NA	SMA311627	-	SCHISTOSOMA MANSONI PARTIAL MRNA FOR HEAT SHOCK PROTEIN (HSP70 GENE)	SCHISTOSOMA MANSONI PARTIAL MRNA FOR HEAT SHOCK PROTEIN (HSP70 GENE)	-	OM0023338-AOP	-	NA	NA	NA	NA	NA	NA	NA	NA	NA	NA	NA	NA	NA	NA	NA	NA	NA	NA	1	UU	NA
42	16	23	19N2	SMU24281	no data	NA	SMU24281	-	SCHISTOSOMA MANSONI 14-3-3 PROTEIN (SM14-3-3) MRNA, COMPLETE CDS [POLY-A TAIL RE	SCHISTOSOMA MANSONI 14-3-3 PROTEIN (SM14-3-3) MRNA, COMPLETE CDS [POLY-A TAIL RE	-	OM0023338-AOP	-	NA	NA	NA	NA	NA	NA	NA	NA	NA	NA	NA	NA	NA	NA	NA	NA	NA	NA	1	UU	NA
42	6	28	1F14	Contig1029	no data	TGTTTGTGTTTTGATGTATGCGTATGTATGTTTGAACGTTTTGTGTGTG	Contig1029	-	SIMILAR TO Q9H9U3 HYPOTHETICAL PROTEIN FLJ12547 4E-05 POSSIBLE ANTISENSE	SIMILAR TO Q9H9U3 HYPOTHETICAL PROTEIN FLJ12547 4E-05 POSSIBLE ANTISENSE	-	OM0023369-AOP	-	NA	NA	NA	NA	NA	NA	NA	NA	NA	NA	NA	NA	NA	NA	NA	NA	NA	NA	1	UU	NA
43	14	23	19G2	SCMSGTPI04	no data	GATAAGATTAAATCAGCTGATGAATGGAAACGAGTAGTCGTAGCATATG	SCMSGTPI04	-	SCHISTOSOMA MANSONI TRIOSE PHOSPHATE ISOMERASE (SGTPI) GENE, EXON 5	SCHISTOSOMA MANSONI TRIOSE PHOSPHATE ISOMERASE (SGTPI) GENE, EXON 5	-	OM0023390-AOP	-	Smp_178120, Smp_003990	NA	NA	NA	+	2	shisto10738c08.p1k, shisto2706a08.p1k, shisto2723c01.q1k	-, +	3	NA	NA	NA	NA	NA	NA	NA	NA	NA	1	US	NA
43	14	24	15O14	Contig5972	no data	CAATCCGGAATTCAAAATCAAGTAAGCTTTTGCCCTTTTACTCTACGCCA	Contig5972	-	SIMILAR TO Q8TGM7 HYPOTHETICAL 6.9 KDA PROTEIN (5E-09)	SIMILAR TO Q8TGM7 HYPOTHETICAL 6.9 KDA PROTEIN (5E-09)	-	OM0023348-AOP	-	NA	NA	NA	NA	NA	NA	NA	NA	NA	NA	NA	NA	NA	NA	NA	NA	NA	NA	1	UU	NA
43	1	28	1C2	AF254148	no data	GCTGAAGATGATGTAAAGGAAAATACGAATGGGAATTCATCGGTC	AF254148	-	SCHISTOSOMA MANSONI PUR-ALPHA-LIKE PROTEIN (PUR-ALPHA) MRNA, COMPLETE CDS [POLY-	SCHISTOSOMA MANSONI PUR-ALPHA-LIKE PROTEIN (PUR-ALPHA) MRNA, COMPLETE CDS [POLY-	-	OM0023389-AOP	-	Smp_042300.1, Smp_042300.2, Smp_042300.3	NA	NA	NA	+	3	shisto11990d07.q1k, shisto10986e06.q1k, shisto12173c06.q1k, shisto1329a06.q1k, shisto3258h06.q1k, shisto4582h02.p1k, shisto7121d08.p1k, shisto9195b06.p1k, shisto6984g09.q1k, shisto3854f08.p1k, shisto10167f02.q1k, shisto11070h02.q1k, shisto11207c08.p1k, shisto12715b01.q1k, shisto12833b04.q1k, shisto12941h01.q1k, shisto3421a03.q1k, shisto6784b04.q1k, shisto10005e03.p1ku, shisto4701a08.p1k, shisto53…
43	2	28	1G2	AF330107	no data	GAATATCAGATTTTGTGTGTGTGTGTGTGTGTGTGTTTCATATATATATA	AF330107	-	SCHISTOSOMA MANSONI CLONE SMCA7-1 MICROSATELLITE SEQUENCE	SCHISTOSOMA MANSONI CLONE SMCA7-1 MICROSATELLITE SEQUENCE	-	OM0023389-AOP	-	NA	NA	NA	NA	NA	NA	NA	NA	NA	NA	NA	NA	NA	NA	NA	NA	NA	NA	1	UU	NA
43	19	28	3K2	Contig1662	no data	TTGATTGGAGTTTTGCATTGAATGTGAGTGCCAAGTGGGCCATTTTTGGT	Contig1662	-	SIMILAR TO INTEGRAL MEMBRANE TRANSPORTER PROTEIN (2E-06) POSSIBLE ANTISENSE	SIMILAR TO INTEGRAL MEMBRANE TRANSPORTER PROTEIN (2E-06) POSSIBLE ANTISENSE	-	OM0023385-AOP	-	NA	NA	NA	NA	NA	NA	NA	NA	NA	NA	NA	NA	NA	NA	NA	NA	NA	NA	1	UU	NA
43	22	28	3G14	Contig1646	no data	TACTTACTACAAGTGGTGGGATTATGGATCATGAGGAAGCCCATCGGAAA	Contig1646	-	SIMILAR TO RIBOSOMAL PROTEIN S15A (8E-56) POSSIBLE ANTISENSE	SIMILAR TO RIBOSOMAL PROTEIN S15A (8E-56) POSSIBLE ANTISENSE	-	OM0023385-AOP	-	Smp_076740	30S ribosomal protein S8, putative	NA	NA	+	1	shisto8936b03.q1k	-	1	NA	NA	NA	NA	NA	NA	NA	NA	NA	1	US	NA
44	7	2	87P14	SMLC21D04	GGGGGGGGGGGGGGGTTTTTTTTTTTTTTTTTTTTTTTTTTTTTAAAAAA	GGGGGGGGGGGGGGGTTTTTTTTTTTTTTTTTTTTTTTTTTTTTAAAAAA	-	-	-	-	-	-	-	NA	NA	NA	NA	NA	NA	NA	NA	NA	NA	NA	NA	NA	NA	NA	NA	NA	NA	1	UU	NA
44	10	17	38H14	CD125136	TAGCAAATATTCAAGTGAGAACCTTGAAGACTGAAGTGGCGGGTGAGCGG	TAGCAAATATTCAAGTGAGAACCTTGAAGACTGAAGTGGCGGGTGAGCGG	Q7RFQ2	Q7RFQ2_PLAYO	Hypothetical protein	124	36.6 (83)	0.24	2	NA	NA	NA	NA	NA	NA	NA	NA	NA	NA	NA	NA	NA	NA	NA	NA	NA	NA	1	UU	NA
44	3	25	11H2	Contig4584	no data	CTCGACCACATACTATCAAAGACTCCAAAACAGATGTACGAAAAGCGCTC	Contig4584	-	UNKNOWN 2544 POSSIBLE ANTISENSE	UNKNOWN 2544 POSSIBLE ANTISENSE	unnamed protein product [Mus musculus]	OM0023354-AOP	-	Smp_043100	heterogeneous nuclear ribonucleoprotein, putative	NA	NA	+	1	shisto11726c02.q1k, shisto2897d03.q1k, shisto2916f05.p1k	-, +	3	NA	NA	NA	NA	NA	NA	NA	NA	NA	1	US	NA
44	11	28	2L2	Contig1401	no data	TTGCGAAGGCAGAAGCCTCTAAAGATGATAAAGATATAAACGCAGTACCA	Contig1401	-	SIMILAR TO RIBOSOMAL PROTEIN L3 (7E-36) POSSIBLE ANTISENSE	SIMILAR TO RIBOSOMAL PROTEIN L3 (7E-36) POSSIBLE ANTISENSE	-	OM0023384-AOP	-	Smp_047200.3	60S ribosomal protein L3, putative	419	NA	+	1	shisto10991a11.p1k, shisto11168c09.p1k, shisto11370c01.q1k, shisto11370g09.q1k, shisto1928f02.p1k, shisto3219a10.p1k, shisto9797e12.q1k	-, +	7	PF00297	Ribosomal_L3	IPR000597	Ribosomal protein L3	Molecular Function: structural constituent of ribosome (GO:0003735), Cellular Component: intracellular (GO:0005622), Cellular Component: ribosome (GO:0005840), Biological Process: translation (GO:0006412)	NA	NA	NA	NA	1	US	NA
44	12	28	2P2	Contig1423	no data	GATGCGATAGATGCAGCAACCCAAGCATTTGAAAAGTACAACATCGAGAA	Contig1423	-	SIMILAR TO DYNEIN 8 KDA LIGHT CHAIN, FLAGELLAR OUTER ARM (8E-43)	SIMILAR TO DYNEIN 8 KDA LIGHT CHAIN, FLAGELLAR OUTER ARM (8E-43)	-	OM0023384-AOP	-	NA	NA	NA	NA	NA	NA	NA	NA	NA	NA	NA	NA	NA	NA	NA	NA	NA	NA	1	UU	NA
45	9	2	880	SMLC24A11A	CTACACCAAAACCAGACCCCTCTCAAATTGATAAAGGAGGATATAGAGTT	NA	Q70W85	Q70W85_SCHMA	Cytochrome c oxidase subunit 1 (Fragment)	408	320 (821)	4e-86	3	NA	NA	NA	NA	NA	NA	NA	NA	NA	NA	NA	NA	NA	NA	NA	NA	NA	NA	4e-86	SU	NA
45	9	16	410000000000000	CD134403	CATAGACTTGACCACCTGAGTCCTAACCACTCACTTAATTAAATATAACT	CATAGACTTGACCACCTGAGTCCTAACCACTCACTTAATTAAATATAACT	Q9MD47	Q9MD47_SCHMA	NADH dehydrogenase 2 (Fragment)	275	46.2 (108)	0.0003	-3	NA	NA	NA	NA	NA	NA	NA	NA	NA	NA	NA	NA	NA	NA	NA	NA	NA	NA	1	UU	NA
45	13	23	19A1	Contig980	no data	CATTGTCTGATTACAATATTCAGAAAGAGTCCACTCTACACTTGGTGTTG	Contig980	-	SIMILAR TO POLYUBIQUITIN C 8E-45 POSSIBLE ANTISENSE	SIMILAR TO POLYUBIQUITIN C 8E-45 POSSIBLE ANTISENSE	-	OM0023376-AOP	-	Smp_009580	ubiquitin (ribosomal protein L40), putative	228	228	+	1	shisto11013h08.q1k, shisto11799b08.p1k, shisto2547g08.q1k, shisto470c09.p1k, shisto2828c11.p1k, shisto3547d08.p1k, shisto11531h06.p1k, shisto4543g06.p1k, shistopuc19N41a09.p1k, shisto12204e05.q1k, shisto1933c05.p1k, shisto3164g08.p1k, shisto5218f05.q1k, shisto10484d06.p1k, shisto4830f07.p1k, shisto9415e10.p1k, shisto10313d06.p1k, shisto11118a11.q1k, shisto4758e10.q1k, shisto5986e05.p1k, shisto743…
45	14	23	190	MTSMCO1	no data	TGCGGTATGCGGGTTTTAGATCCCATAGTATGGTGATTAGTCGGTTTTAT	MTSMCO1	-	SCHISTOSOMA MANSONI MITOCHONDRIAL COX1 GENE, PARTIAL	SCHISTOSOMA MANSONI MITOCHONDRIAL COX1 GENE, PARTIAL	-	OM0023376-AOP	-	NA	NA	NA	NA	NA	NA	NA	NA	NA	NA	NA	NA	NA	NA	NA	NA	NA	NA	1	UU	NA
45	19	28	3I1	Contig1565	no data	TACGATTAAAGCCAGGACGAAAGTTTTCCGTATTATCTCGTTTGTCTAA	Contig1565	-	SIMILAR TO 60S RIBOSOMAL PROTEIN L13A (23 KDA HIGHLY BASIC PROTEIN) 2E-69	SIMILAR TO 60S RIBOSOMAL PROTEIN L13A (23 KDA HIGHLY BASIC PROTEIN) 2E-69	-	OM0023335-AOP	-	Smp_090230	60S ribosomal protein L13a, putative	203	NA	+	1	shisto11600b12.p1k	-	1	PF00572	Ribosomal_L13	IPR005822	Ribosomal protein L13	Molecular Function: structural constituent of ribosome (GO:0003735), Cellular Component: intracellular (GO:0005622), Cellular Component: ribosome (GO:0005840), Biological Process: translation (GO:0006412)	NA	NA	NA	NA	1	US	NA
46	1	2	87J1	SMLC18B04	GGGAGAAGAAAACAACACGGGCATTCTCTCTTTTTTTTTTTTTTTTTTTT	GGGAGAAGAAAACAACACGGGCATTCTCTCTTTTTTTTTTTTTTTTTTTT	Q8CTD8	Q8CTD8_STAES	Hypothetical protein SE0554	216	35.0 (79)	8.5	-2	NA	NA	NA	NA	NA	NA	NA	NA	NA	NA	NA	NA	NA	NA	NA	NA	NA	NA	1	UU	NA
46	14	2	88J13	SMLC26F03	AAAATGGGAGATGAGGATGTTGCTGCTCTTGTCATCGACAATGGATCTGG	TGGGAGATGAGGATGTTGCTGCTCTTGTCATCGACAATGGATCTGG	Q8TA69	Q8TA69_CRAGI	Actin 2	376	185 (469)	2e-45	1	Smp_183710, Smp_046590.2, Smp_046600	NA	NA	NA	+	3	shisto10768c03.p1k, shisto3669c05.q1k, shisto1257f12.q1k, shisto1374a02.q1k, shisto424g03.q1k, shisto5214e08.p1k, shisto10903f01.q1k, shisto11810c07.p1k, shisto3022f08.q1k, shisto3408g06.q1k, shisto8046c10.q1k, shisto8416h08.q1k, shisto11811b04.q1k, shisto2828h08.p1k, shisto4473c11.p1k, shisto6999f10.q1k, shisto9815h01.q1k, shisto2549c09.p1k, shisto7779h03.p1k, shisto11719a11.q1k, shisto2566d09.p…	-, +	22	NA	NA	NA	NA	NA	NA	NA	NA	NA	2e-45	SS	NA
46	4	8	67N13	CONTIG2788	TTCATTTTATCCCTTGGAAGCTCTCTGTTCATTTATTTTACGCAACACTC	TTCATTTTATCCCTTGGAAGCTCTCTGTTCATTTATTTTACGCAACACTC	Q5D8X0	Q5D8X0_SCHJA	SJCHGC00633 protein	243	154 (389)	3e-36	-2	Smp_044000	bax inhibitor, putative	243	NA	+	1	shisto2033h03.p1k, shisto2998e07.p1k	-	2	PF01027	UPF0005	IPR006214	Protein of unknown function UPF0005	-	NA	NA	NA	NA	3e-36	AS	NA
46	27	21	27N1	CD080877	CGTGAAAAGAAGGAGATCAAACGACTTGAAGAATCACTCAAAAGAAGAAA	CGTGAAAAGAAGGAGATCAAACGACTTGAAGAATCACTCAAAAGAAGAAA	Q86DY6	Q86DY6_SCHJA	Clone ZZZ416 mRNA sequence	119	69.7 (169)	5e-11	3	Smp_134510	hypothetical protein	119	NA	+	1	shisto1310a01.p1k, shisto4400h08.q1k, shisto8918b01.q1k	-, +	3	PF04568	IATP	IPR007648	Mitochondrial ATPase inhibitor, IATP	Molecular Function: enzyme inhibitor activity (GO:0004857), Cellular Component: mitochondrion (GO:0005739), Biological Process: negative regulation of nucleotide metabolic process (GO:0045980)	NA	NA	NA	NA	5e-11	SS	NA
46	4	27	4N13	Contig2228	no data	TTGGGCGATCATTGCTCTACATTCCAACAGGATGTGGGATTTCCAAACAA	Contig2228	-	UNKNOWN 1108	UNKNOWN 1108	-	OM0023343-AOP	-	NA	NA	NA	NA	NA	NA	NA	NA	NA	NA	NA	NA	NA	NA	NA	NA	NA	NA	1	UU	NA
46	22	27	6N13	Contig2954	no data	TGGCAGTCAGTTTTTTATAACTTTGGCTCCTACACAGTGGTTAGATGGT	Contig2954	-	SIMILAR TO PEPTIDYL-PROLYL CIS-TRANS ISOMERASE LIKE 1 (EC 5.2.1.8) (PPIASE) (ROT	SIMILAR TO PEPTIDYL-PROLYL CIS-TRANS ISOMERASE LIKE 1 (EC 5.2.1.8) (PPIASE) (ROT	-	OM0023397-AOP	-	Smp_029900.1, Smp_029900.2	NA	NA	NA	+	2	shisto516e12.p1k	-	1	NA	NA	NA	NA	NA	NA	NA	NA	NA	1	US	NA
46	17	28	3B1	Contig1785	no data	TAATCACTTTCGACCGTTTGGCAATTCTCAGTCCTCTAGGAAAAAAT	Contig1785	-	SIMILAR TO RIBOSOMAL PROTEIN L18 (4E-70)	SIMILAR TO RIBOSOMAL PROTEIN L18 (4E-70)	-	OM0023327-AOP	-	Smp_031570	60S ribosomal protein L18, putative	188	NA	+	1	shisto10352d10.p1k, shisto10660h07.q1k, shisto3681b11.p1k, shisto6591f07.p1k, shisto9399e06.p1k	-, +	5	PF00828	Ribosomal_L18e	IPR000039	Ribosomal protein L18e	Molecular Function: structural constituent of ribosome (GO:0003735), Cellular Component: intracellular (GO:0005622), Cellular Component: ribosome (GO:0005840), Biological Process: translation (GO:0006412)	NA	NA	NA	NA	1	US	NA
47	5	1	91C1	CL429	ATATCTTCGTGTCAGACGATTTCGTAAGAATATACAGAGTGGTAGACATT	TATCTTCGTGTCAGACGATTTCGTAAGAATATACAGAGTGGTAGACATT	Q86DX5	Q86DX5_SCHJA	Clone ZZZ456 mRNA sequence	264	338 (868)	6e-92	1	Smp_011570.2, Smp_011570.1	NA	NA	NA	-	2	shisto4651c04.p1k	-	1	NA	NA	NA	NA	NA	NA	NA	NA	NA	6e-92	SA	NA
47	25	2	90C1	SMLC9B05	TTAAACACTCCAGCTTTTATAAACTTCCGTTTGAGAGATATTTTCCCCCG	TTAAACACTCCAGCTTTTATAAACTTCCGTTTGAGAGATATTTTCCCCCG	Q86DZ5	Q86DZ5_SCHJA	Clone ZZZ39 mRNA sequence	226	288 (737)	2e-76	1	Smp_027610	40S ribosomal protein S3, putative	230	NA	-	1	shisto3664b01.p1k	+	1	PF00189; PF07650	KH_2; Ribosomal_S3_C	IPR001351; IPR004044	K Homology, type 2; Ribosomal protein S3, C-terminal	Molecular Function: RNA binding (GO:0003723); Molecular Function: structural constituent of ribosome (GO:0003735), Cellular Component: intracellular (GO:0005622), Cellular Component: ribosome (GO:0005840), Biological Process: translation (GO:0006412)	NA	NA	NA	NA	2e-76	SA	NA
47	22	4	83G1	SMLA24D02	CGGGGGGGACCCCACCCTTTTAAAAAAAAAAAAAAAAAAAAAAAAAAAAA	CGGGGGGGACCCCACCCTTTTAAAAAAAAAAAAAAAAAAAAAAAAAAAAA	Q6Z422	Q6Z422_ORYSA	Putative C2H2 zinc-finger protein SERRATE	666	35.0 (79)	4.4	1	NA	NA	NA	NA	NA	NA	NA	NA	NA	NA	NA	NA	NA	NA	NA	NA	NA	NA	1	UU	NA
47	3	23	17O13	Contig6713	no data	TCCTCCAAAAGAAGAAAGCTGAGCTTAAGTTTACACACACACACACAC	Contig6713	-	UNKNOWN 4157	UNKNOWN 4157	-	OM0023373-AOP	-	NA	NA	NA	NA	NA	NA	NA	NA	NA	NA	NA	NA	NA	NA	NA	NA	NA	NA	1	UU	NA
47	7	28	1K13	AF056330	no data	GAGGAAAACGAGCCTGAGAGCATCAGTCGATCGATATTGATTTCCCTTT	AF056330	-	SCHISTOSOMA MANSONI AUT1 (AUT1) MRNA, COMPLETE CDS	SCHISTOSOMA MANSONI AUT1 (AUT1) MRNA, COMPLETE CDS	-	OM0023326-AOP	-	NA	NA	NA	NA	NA	NA	NA	NA	NA	NA	NA	NA	NA	NA	NA	NA	NA	NA	1	UU	NA
48	4	3	84P1	SMLA43H06	GGGGGGTTTTTTTTTTTTTTTTTTTTTTTTTTTTTTTAGGGGCCCCCTTT	GGGGGGTTTTTTTTTTTTTTTTTTTTTTTTTTTTTTTAGGGGCCCCCTTT	-	-	-	-	-	-	-	NA	NA	NA	NA	NA	NA	NA	NA	NA	NA	NA	NA	NA	NA	NA	NA	NA	NA	1	UU	NA
48	21	16	43H1	CD144629	GCAGAGCGGACCGTATCTTGGCTAAGACGTATTTTACTCTCCACACTTCG	GCAGAGCGGACCGTATCTTGGCTAAGACGTATTTTACTCTCCACACTTCG	Q5DHN8	Q5DHN8_SCHJA	SJCHGC07042 protein	234	202 (513)	3e-51	2	Smp_180000	40S ribosomal protein S9, putative	NA	NA	-	1	shisto10852b12.q1k, shisto2691g04.p1k, shisto3800b08.q1k, shisto6529b06.p1k, shisto7713e05.q1k, shisto8170b07.q1k	-, +	6	NA	NA	NA	NA	NA	NA	NA	NA	NA	3e-51	SA	NA

## Sheet: constit_1pc_GO.xls
GOID	NodeSize	SampleMatch	Phyper	Term	Ont	SampleKeys
GO:0006414	9	5	2.39258e-06	translational elongation	BP	Smp_029820 Smp_083410 Smp_030690 Smp_099870.1 Smp_041980
GO:0043284	12	5	1.40249e-05	biopolymer biosynthetic process	BP	Smp_029820 Smp_083410 Smp_030690 Smp_099870.1 Smp_041980
GO:0006412	130	39	4.17958e-34	translation	BP	Smp_029820 Smp_083410 Smp_039400 Smp_018990 Smp_022640 Smp_132300 Smp_146190 Smp_171570 Smp_090230 Smp_096750 Smp_027610 Smp_030690 Smp_098960 Smp_032760 Smp_053130 Smp_180000 Smp_091640 Smp_047200.3 Smp_093440 Smp_021140 Smp_191540 Smp_017280 Smp_101450 Smp_063350 Smp_119920 Smp_035800 Smp_099870.1 Smp_031570 Smp_035790 Smp_004940 Smp_174950 Smp_004980 Smp_026100 Smp_076740 Smp_014650 Smp_041980…
GO:0009059	150	39	2.2693e-31	macromolecule biosynthetic process	BP	Smp_029820 Smp_083410 Smp_039400 Smp_018990 Smp_022640 Smp_132300 Smp_146190 Smp_171570 Smp_090230 Smp_096750 Smp_027610 Smp_030690 Smp_098960 Smp_032760 Smp_053130 Smp_180000 Smp_091640 Smp_047200.3 Smp_093440 Smp_021140 Smp_191540 Smp_017280 Smp_101450 Smp_063350 Smp_119920 Smp_035800 Smp_099870.1 Smp_031570 Smp_035790 Smp_004940 Smp_174950 Smp_004980 Smp_026100 Smp_076740 Smp_014650 Smp_041980…
GO:0044249	208	39	2.05316e-25	cellular biosynthetic process	BP	Smp_029820 Smp_083410 Smp_039400 Smp_018990 Smp_022640 Smp_132300 Smp_146190 Smp_171570 Smp_090230 Smp_096750 Smp_027610 Smp_030690 Smp_098960 Smp_032760 Smp_053130 Smp_180000 Smp_091640 Smp_047200.3 Smp_093440 Smp_021140 Smp_191540 Smp_017280 Smp_101450 Smp_063350 Smp_119920 Smp_035800 Smp_099870.1 Smp_031570 Smp_035790 Smp_004940 Smp_174950 Smp_004980 Smp_026100 Smp_076740 Smp_014650 Smp_041980…
GO:0009058	263	39	2.3572e-21	biosynthetic process	BP	Smp_029820 Smp_083410 Smp_039400 Smp_018990 Smp_022640 Smp_132300 Smp_146190 Smp_171570 Smp_090230 Smp_096750 Smp_027610 Smp_030690 Smp_098960 Smp_032760 Smp_053130 Smp_180000 Smp_091640 Smp_047200.3 Smp_093440 Smp_021140 Smp_191540 Smp_017280 Smp_101450 Smp_063350 Smp_119920 Smp_035800 Smp_099870.1 Smp_031570 Smp_035790 Smp_004940 Smp_174950 Smp_004980 Smp_026100 Smp_076740 Smp_014650 Smp_041980…
GO:0010467	367	40	7.42646e-17	gene expression	BP	Smp_029820 Smp_083410 Smp_039400 Smp_018990 Smp_022640 Smp_132300 Smp_146190 Smp_171570 Smp_090230 Smp_096750 Smp_027610 Smp_030690 Smp_098960 Smp_032760 Smp_053130 Smp_180000 Smp_091640 Smp_047200.3 Smp_093440 Smp_021140 Smp_191540 Smp_017280 Smp_101450 Smp_097750 Smp_063350 Smp_119920 Smp_035800 Smp_099870.1 Smp_031570 Smp_035790 Smp_004940 Smp_174950 Smp_004980 Smp_026100 Smp_076740 Smp_014650…
GO:0044267	598	48	5.5474e-16	cellular protein metabolic process	BP	Smp_029820 Smp_083410 Smp_039400 Smp_018990 Smp_022640 Smp_132300 Smp_146190 Smp_171570 Smp_090230 Smp_096750 Smp_027610 Smp_030290 Smp_092280 Smp_030690 Smp_098960 Smp_032760 Smp_053130 Smp_180000 Smp_091640 Smp_047200.3 Smp_008545 Smp_045510 Smp_079230 Smp_079450 Smp_093440 Smp_021140 Smp_191540 Smp_017280 Smp_063420 Smp_101450 Smp_063350 Smp_119920 Smp_035800 Smp_099870.1 Smp_031570 Smp_035790…
GO:0044260	604	48	8.68916e-16	cellular macromolecule metabolic process	BP	Smp_029820 Smp_083410 Smp_039400 Smp_018990 Smp_022640 Smp_132300 Smp_146190 Smp_171570 Smp_090230 Smp_096750 Smp_027610 Smp_030290 Smp_092280 Smp_030690 Smp_098960 Smp_032760 Smp_053130 Smp_180000 Smp_091640 Smp_047200.3 Smp_008545 Smp_045510 Smp_079230 Smp_079450 Smp_093440 Smp_021140 Smp_191540 Smp_017280 Smp_063420 Smp_101450 Smp_063350 Smp_119920 Smp_035800 Smp_099870.1 Smp_031570 Smp_035790…
GO:0019538	625	48	4.00954e-15	protein metabolic process	BP	Smp_029820 Smp_083410 Smp_039400 Smp_018990 Smp_022640 Smp_132300 Smp_146190 Smp_171570 Smp_090230 Smp_096750 Smp_027610 Smp_030290 Smp_092280 Smp_030690 Smp_098960 Smp_032760 Smp_053130 Smp_180000 Smp_091640 Smp_047200.3 Smp_008545 Smp_045510 Smp_079230 Smp_079450 Smp_093440 Smp_021140 Smp_191540 Smp_017280 Smp_063420 Smp_101450 Smp_063350 Smp_119920 Smp_035800 Smp_099870.1 Smp_031570 Smp_035790…
GO:0044238	1155	52	1.05134e-06	primary metabolic process	BP	Smp_029820 Smp_083410 Smp_039400 Smp_018990 Smp_022640 Smp_134510 Smp_132300 Smp_146190 Smp_171570 Smp_090230 Smp_096750 Smp_027610 Smp_030290 Smp_092280 Smp_030690 Smp_098960 Smp_032760 Smp_053130 Smp_180000 Smp_091640 Smp_047200.3 Smp_008545 Smp_045510 Smp_079230 Smp_079450 Smp_024110 Smp_093440 Smp_021140 Smp_191540 Smp_017280 Smp_063420 Smp_101450 Smp_097750 Smp_063350 Smp_119920 Smp_035800 S…
GO:0043170	920	53	4.52532e-12	macromolecule metabolic process	BP	Smp_029820 Smp_083410 Smp_039400 Smp_018990 Smp_022640 Smp_132300 Smp_146190 Smp_171570 Smp_155060.2 Smp_090230 Smp_096750 Smp_027610 Smp_030290 Smp_092280 Smp_030690 Smp_098960 Smp_032760 Smp_053130 Smp_180000 Smp_091640 Smp_003770 Smp_047200.3 Smp_008545 Smp_045510 Smp_079230 Smp_079450 Smp_024110 Smp_093440 Smp_021140 Smp_191540 Smp_017280 Smp_063420 Smp_101450 Smp_097750 Smp_063350 Smp_119920…
GO:0044237	1140	54	1.81356e-08	cellular metabolic process	BP	Smp_029820 Smp_083410 Smp_039400 Smp_018990 Smp_022640 Smp_134510 Smp_132300 Smp_146190 Smp_171570 Smp_090230 Smp_096750 Smp_027610 Smp_030290 Smp_092280 Smp_030690 Smp_098960 Smp_032760 Smp_053130 Smp_180000 Smp_091640 Smp_047200.3 Smp_008545 Smp_045510 Smp_079230 Smp_008070 Smp_079450 Smp_024120 Smp_024110 Smp_093440 Smp_021140 Smp_191540 Smp_017280 Smp_063420 Smp_101450 Smp_097750 Smp_063350 S…
GO:0008152	1372	57	4.71506e-07	metabolic process	BP	Smp_029820 Smp_083410 Smp_039400 Smp_018990 Smp_022640 Smp_134510 Smp_132300 Smp_146190 Smp_171570 Smp_155060.2 Smp_090230 Smp_096750 Smp_027610 Smp_030290 Smp_092280 Smp_030690 Smp_098960 Smp_032760 Smp_053130 Smp_180000 Smp_091640 Smp_003770 Smp_047200.3 Smp_008545 Smp_045510 Smp_079230 Smp_008070 Smp_079450 Smp_024120 Smp_024110 Smp_017450 Smp_093440 Smp_021140 Smp_191540 Smp_017280 Smp_063420…
GO:0009987	1577	58	8.88664e-05	cellular process	BP	Smp_029820 Smp_083410 Smp_039400 Smp_018990 Smp_022640 Smp_134510 Smp_132300 Smp_146190 Smp_171570 Smp_155060.2 Smp_090230 Smp_096750 Smp_027610 Smp_030290 Smp_092280 Smp_030690 Smp_098960 Smp_032760 Smp_053130 Smp_104660 Smp_180000 Smp_091640 Smp_003770 Smp_047200.3 Smp_008545 Smp_045510 Smp_079230 Smp_073590 Smp_008070 Smp_079450 Smp_024120 Smp_024110 Smp_093440 Smp_021140 Smp_191540 Smp_017280…
GO:0003746	7	3	0.000444408	translation elongation factor activity	MF	Smp_083410 Smp_030690 Smp_099870.1
GO:0008135	20	4	0.00113889	translation factor activity, nucleic acid binding	MF	Smp_083410 Smp_039400 Smp_030690 Smp_099870.1
GO:0045182	20	4	0.00113889	translation regulator activity	MF	Smp_083410 Smp_039400 Smp_030690 Smp_099870.1
GO:0003735	81	35	1.9677e-39	structural constituent of ribosome	MF	Smp_029820 Smp_018990 Smp_022640 Smp_132300 Smp_146190 Smp_171570 Smp_090230 Smp_096750 Smp_027610 Smp_098960 Smp_032760 Smp_053130 Smp_180000 Smp_091640 Smp_047200.3 Smp_093440 Smp_021140 Smp_191540 Smp_017280 Smp_101450 Smp_063350 Smp_119920 Smp_035800 Smp_031570 Smp_035790 Smp_004940 Smp_174950 Smp_004980 Smp_026100 Smp_076740 Smp_014650 Smp_041980 Smp_051260 Smp_153790 Smp_084460
GO:0005198	117	36	2.76037e-34	structural molecule activity	MF	Smp_029820 Smp_018990 Smp_022640 Smp_132300 Smp_146190 Smp_171570 Smp_090230 Smp_096750 Smp_027610 Smp_098960 Smp_032760 Smp_053130 Smp_180000 Smp_091640 Smp_047200.3 Smp_093440 Smp_021140 Smp_191540 Smp_017280 Smp_101450 Smp_063350 Smp_119920 Smp_035800 Smp_031570 Smp_035790 Smp_004940 Smp_174950 Smp_004980 Smp_026100 Smp_076740 Smp_014650 Smp_030730 Smp_041980 Smp_051260 Smp_153790 Smp_084460
GO:0005853	3	2	0.00388503	eukaryotic translation elongation factor 1 complex	CC	Smp_083410 Smp_030690
GO:0015934	3	3	4.6974e-05	large ribosomal subunit	CC	Smp_090230 Smp_098960 Smp_101450
GO:0015935	7	3	0.00147959	small ribosomal subunit	CC	Smp_027610 Smp_180000 Smp_093440
GO:0033279	10	6	3.48158e-07	ribosomal subunit	CC	Smp_090230 Smp_027610 Smp_098960 Smp_180000 Smp_093440 Smp_101450
GO:0005840	81	35	1.56993e-34	ribosome	CC	Smp_029820 Smp_018990 Smp_022640 Smp_132300 Smp_146190 Smp_171570 Smp_090230 Smp_096750 Smp_027610 Smp_098960 Smp_032760 Smp_053130 Smp_180000 Smp_091640 Smp_047200.3 Smp_093440 Smp_021140 Smp_191540 Smp_017280 Smp_101450 Smp_063350 Smp_119920 Smp_035800 Smp_031570 Smp_035790 Smp_004940 Smp_174950 Smp_004980 Smp_026100 Smp_076740 Smp_014650 Smp_041980 Smp_051260 Smp_153790 Smp_084460
GO:0030529	107	36	5.79332e-31	ribonucleoprotein complex	CC	Smp_029820 Smp_018990 Smp_022640 Smp_132300 Smp_146190 Smp_171570 Smp_090230 Smp_096750 Smp_027610 Smp_098960 Smp_032760 Smp_053130 Smp_104660 Smp_180000 Smp_091640 Smp_047200.3 Smp_093440 Smp_021140 Smp_191540 Smp_017280 Smp_101450 Smp_063350 Smp_119920 Smp_035800 Smp_031570 Smp_035790 Smp_004940 Smp_174950 Smp_004980 Smp_026100 Smp_076740 Smp_014650 Smp_041980 Smp_051260 Smp_153790 Smp_084460
GO:0043228	213	37	1.95488e-20	non-membrane-bound organelle	CC	Smp_029820 Smp_018990 Smp_022640 Smp_132300 Smp_146190 Smp_171570 Smp_090230 Smp_096750 Smp_027610 Smp_098960 Smp_032760 Smp_053130 Smp_180000 Smp_091640 Smp_003770 Smp_047200.3 Smp_093440 Smp_021140 Smp_191540 Smp_017280 Smp_101450 Smp_063350 Smp_119920 Smp_035800 Smp_031570 Smp_035790 Smp_004940 Smp_174950 Smp_004980 Smp_026100 Smp_076740 Smp_014650 Smp_030730 Smp_041980 Smp_051260 Smp_153790 S…
GO:0043232	213	37	1.95488e-20	intracellular non-membrane-bound organelle	CC	Smp_029820 Smp_018990 Smp_022640 Smp_132300 Smp_146190 Smp_171570 Smp_090230 Smp_096750 Smp_027610 Smp_098960 Smp_032760 Smp_053130 Smp_180000 Smp_091640 Smp_003770 Smp_047200.3 Smp_093440 Smp_021140 Smp_191540 Smp_017280 Smp_101450 Smp_063350 Smp_119920 Smp_035800 Smp_031570 Smp_035790 Smp_004940 Smp_174950 Smp_004980 Smp_026100 Smp_076740 Smp_014650 Smp_030730 Smp_041980 Smp_051260 Smp_153790 S…
GO:0043226	566	41	9.99606e-09	organelle	CC	Smp_029820 Smp_018990 Smp_022640 Smp_134510 Smp_132300 Smp_146190 Smp_171570 Smp_155060.2 Smp_090230 Smp_096750 Smp_027610 Smp_092380 Smp_098960 Smp_032760 Smp_049550 Smp_053130 Smp_180000 Smp_091640 Smp_003770 Smp_047200.3 Smp_093440 Smp_021140 Smp_191540 Smp_017280 Smp_101450 Smp_063350 Smp_119920 Smp_035800 Smp_031570 Smp_035790 Smp_004940 Smp_174950 Smp_004980 Smp_026100 Smp_076740 Smp_014650…
GO:0043229	566	41	9.99606e-09	intracellular organelle	CC	Smp_029820 Smp_018990 Smp_022640 Smp_134510 Smp_132300 Smp_146190 Smp_171570 Smp_155060.2 Smp_090230 Smp_096750 Smp_027610 Smp_092380 Smp_098960 Smp_032760 Smp_049550 Smp_053130 Smp_180000 Smp_091640 Smp_003770 Smp_047200.3 Smp_093440 Smp_021140 Smp_191540 Smp_017280 Smp_101450 Smp_063350 Smp_119920 Smp_035800 Smp_031570 Smp_035790 Smp_004940 Smp_174950 Smp_004980 Smp_026100 Smp_076740 Smp_014650…
GO:0044444	208	42	2.01931e-27	cytoplasmic part	CC	Smp_029820 Smp_083410 Smp_018990 Smp_022640 Smp_134510 Smp_132300 Smp_146190 Smp_171570 Smp_090230 Smp_096750 Smp_027610 Smp_030290 Smp_092280 Smp_030690 Smp_098960 Smp_032760 Smp_049550 Smp_053130 Smp_180000 Smp_091640 Smp_047200.3 Smp_024110 Smp_093440 Smp_021140 Smp_191540 Smp_017280 Smp_101450 Smp_063350 Smp_119920 Smp_035800 Smp_031570 Smp_035790 Smp_004940 Smp_174950 Smp_004980 Smp_026100 S…
GO:0005737	305	44	1.1045e-22	cytoplasm	CC	Smp_029820 Smp_083410 Smp_018990 Smp_022640 Smp_134510 Smp_132300 Smp_146190 Smp_171570 Smp_090230 Smp_096750 Smp_027610 Smp_030290 Smp_092280 Smp_030690 Smp_098960 Smp_032760 Smp_049550 Smp_053130 Smp_180000 Smp_091640 Smp_047200.3 Smp_024110 Smp_054240 Smp_093440 Smp_021140 Smp_191540 Smp_017280 Smp_101450 Smp_063350 Smp_119920 Smp_035800 Smp_099870.1 Smp_031570 Smp_035790 Smp_004940 Smp_174950…
GO:0032991	320	43	1.69948e-20	macromolecular complex	CC	Smp_029820 Smp_083410 Smp_018990 Smp_022640 Smp_132300 Smp_146190 Smp_171570 Smp_090230 Smp_096750 Smp_027610 Smp_030290 Smp_092280 Smp_030690 Smp_098960 Smp_032760 Smp_053130 Smp_104660 Smp_180000 Smp_091640 Smp_003770 Smp_047200.3 Smp_024110 Smp_093440 Smp_021140 Smp_191540 Smp_017280 Smp_101450 Smp_063350 Smp_119920 Smp_035800 Smp_031570 Smp_035790 Smp_004940 Smp_174950 Smp_004980 Smp_026100 S…
GO:0044424	708	49	7.34287e-12	intracellular part	CC	Smp_029820 Smp_083410 Smp_018990 Smp_022640 Smp_134510 Smp_132300 Smp_146190 Smp_171570 Smp_155060.2 Smp_090230 Smp_096750 Smp_027610 Smp_030290 Smp_092380 Smp_092280 Smp_030690 Smp_098960 Smp_032760 Smp_049550 Smp_053130 Smp_104660 Smp_180000 Smp_091640 Smp_003770 Smp_047200.3 Smp_024110 Smp_054240 Smp_093440 Smp_021140 Smp_191540 Smp_017280 Smp_101450 Smp_063350 Smp_119920 Smp_035800 Smp_099870…
GO:0005622	1012	52	1.15104e-07	intracellular	CC	Smp_029820 Smp_083410 Smp_018990 Smp_022640 Smp_134510 Smp_132300 Smp_146190 Smp_171570 Smp_155060.2 Smp_090230 Smp_096750 Smp_027610 Smp_030290 Smp_092380 Smp_092280 Smp_030690 Smp_098960 Smp_032760 Smp_049550 Smp_053130 Smp_104660 Smp_180000 Smp_091640 Smp_006390 Smp_003770 Smp_047200.3 Smp_054780 Smp_073590 Smp_024110 Smp_054240 Smp_093440 Smp_021140 Smp_191540 Smp_017280 Smp_101450 Smp_063350…

## Sheet: Platyhelminth restricted
ID
BF936584
CD080877
CD096000
CD121177
CD141637
CD161501
CF493942
Contig1149 EST cluster from Schistosoma mansoni 28/06/2002, 541bp
Contig1192 EST cluster from Schistosoma mansoni 28/06/2002, 445bp
Contig1192 EST cluster from Schistosoma mansoni 28/06/2002, 445bp
Contig1266 EST cluster from Schistosoma mansoni
Contig1373 EST cluster from Schistosoma mansoni 28/06/2002, 466bp
Contig1437 EST cluster from Schistosoma mansoni 28/06/2002, 431bp
Contig1497 EST cluster from Schistosoma mansoni 28/06/2002, 436bp
Contig151 EST cluster from Schistosoma mansoni 28/06/2002, 359bp
Contig1620 EST cluster from Schistosoma mansoni 28/06/2002, 720bp
Contig1698 EST cluster from Schistosoma mansoni 28/06/2002, 370bp
Contig1837 EST cluster from Schistosoma mansoni 28/06/2002, 295bp
Contig2055 EST cluster from Schistosoma mansoni 28/06/2002, 143bp
Contig2228 EST cluster from Schistosoma mansoni 28/06/2002, 296bp
Contig2400 EST cluster from Schistosoma mansoni 28/06/2002, 179bp
Contig3497 EST cluster from Schistosoma mansoni 28/06/2002, 214bp
Contig4152 EST cluster from Schistosoma mansoni 28/06/2002, 406bp
Contig4152 EST cluster from Schistosoma mansoni 28/06/2002, 406bp
Contig5186 EST cluster from Schistosoma mansoni 28/06/2002, 308bp
Contig5191 EST cluster from Schistosoma mansoni 28/06/2002, 170bp
Contig5326 EST cluster from Schistosoma mansoni 28/06/2002, 560bp
Contig5603 EST cluster from Schistosoma mansoni 28/06/2002, 130bp
Contig5673 EST cluster from Schistosoma mansoni 28/06/2002, 233bp
Contig5970 EST cluster from Schistosoma mansoni 28/06/2002, 334bp
Contig5971 EST cluster from Schistosoma mansoni 28/06/2002
Contig6332 EST cluster from Schistosoma mansoni 28/06/2002, 160bp
CONTIG8628
gi|175903|gb|L03646.1|SCMRRNAB Schistosoma mansoni ribosomal RNA
gi|175904|gb|L03647.1|SCMRRNAC Schistosoma mansoni ribosomal RNA
gi|175906|gb|L03649.1|SCMRRNAE Schistosoma mansoni ribosomal RNA
gi|2623847|gb|AF030971.1|AF030971 Schistosoma mansoni clone 13 unknown mRNA
gi|3063619|gb|AF056330.1|AF056330 Schistosoma mansoni AUT1 (AUT1)
gi|732957|emb|X85246.1|SM58SRRNA S.mansoni partial gene for
gi|837019|gb|U22168.1|SMU22168 Schistosoma mansoni 5.8S
SMLA16F03
