# Supplementary material for: Anti-schistosomal Intervention Targets Identified by Lifecycle Transcriptomic Analyses
Source: PLoS Negl Trop Dis. 2009 Nov 3;3(11):e543. doi: 10.1371/journal.pntd.0000543 (PMC2764848; doi:10.1371/journal.pntd.0000543)
Supplement: Dataset S7 — Expression profiles for all annotated fucosyltransferases (FucTs, PF00852) contained in the Schistosoma mansoni GeneDB version 4 assembly. All FucTs nucleotide sequences were downloaded from the Schistosoma mansoni GeneDB version 4 assembly and clustered according to the Methods. Details of this assembly are included in the ‘FucT assembly’ worksheet. The ‘FucT’ worksheet provides the normalised expression profiles for each FucT, where a 50-mer oligonucleotide could be mapped to the genome assembly. The ‘FucT RTPCR’ worksheet provides the details of FucT expression verified by real time PCR analysis. The ‘FucT for heatmap’ worksheet provides the average FucT expression values used for construction of the lifecycle heatmap depicted in Figure 7. All subsequent worksheets provide individual FucT gene expression profiles for 50-mer oligonucleotides mapped to Smp gene predictions. (0.14 MB XLS) [file pntd.0000543.s007.xls]

## Sheet: FucT assembly
FucT assembly (all PFAM annotated fucosyltransferases, PF00852 in version 4.0 of Schistosoma mansoni GeneDB)
Contig Number		GeneDB annotation of assembled members
Contig1		Smp_137740	Smp_142860	Smp_193870	Smp_189280	Smp_028910
Contig2		Smp_099090	Sm03490	Smp_109500
Contig3		Smp_148850	Sm03546
Contig4		Smp_137730	Smp_185720
Contig5		Smp_194990	Sm15639
Contig6		Smp_129750
Contig7		Smp_154410
Contig8		Smp_054300

## Sheet: FucT
Schisto FucT
									EGG (UT01)			Miracidia (UT02)			2 Day Sporocysts (UT03)			Daughter Sporocysts (UT04)			Cercariae (UT05)			3hr somules (UT06)			24hr somules (UT07)			3day somules (UT08)			6day somules (UT09)			2wk worms (UT10)			3wk worms (UT11)			5wk worms (UT12)			7wk worms (UT13)			7wk males (UT14)
Smpnumber	Smp_Scaffold	FucT cluster number	Genome ID	Array ID	Array BLASTx ID		Oligo Location (Exon, UTR, etc)	SmV2_08_870730_output	SmV2_09_870730_output	SmV2_10_870730_output	SmV2_89_870730_output	SmV2_90_870730_output	SmV2_91_870730_output	SmV2_86_870730_output	SmV2_87_870730_output	SmV2_88_870730_output	SmV2_83_870730_output	SmV2_84_870730_output	SmV2_85_870730_output	SmV2_20_870730_output	SmV2_21_870730_output	SmV2_22_870730_output	SmV2_17_870730_output	SmV2_18_870730_output	SmV2_19_870730_output	SmV2_11_870730_output	SmV2_12_870730_output	SmV2_13_870730_output	SmV2_05_870730_output	SmV2_06_870730_output	SmV2_07_870730_output	SmV2_14_870730_output	SmV2_15_870730_output	SmV2_16_870730_output	SmV2_92_870730_output	SmV2_93_870730_output	SmV2_94_870730_output	SmV2_23_870730_output	SmV2_24_870730_output	SmV2_76_870730_output	SmV2_77_870730_output	SmV2_78_870730_output	SmV2_79_870730_output	SmV2_80_870730_output	SmV2_81_870730_output	SmV2_82_870730_output	SmV2_98_870730_output	SmV2_99_870730_output	SmV2_100_870730_output
Smp_028910	Smp_scaff000060	Contig1	alpha-(1,3)-fucosyltransferase, putative	No oligo
Smp_054300	Smp_scaff000144	Contig8	alpha(1,3)fucosyltransferase, putative	CD154939	Q5DFD1_SCHJA; SJCHGC09057 protein		Exon 2	3430.93	2773.93	4330.61	27374	31930.7	12331.5	29382.1	21747.2	17686.5	4669.57	5694.44	4590.61	288.257	352.736	383.655	290.613	322.499	204.718	220.258	334.518	180.629	622.921	265.142	458.562	1321.64	1517.64	1043.43	119.011	92.5059	106.034	724.776	650.408	835.336	18164.2	14136.6	12565.4	7545.9	5912.81	5892.27	3035.7	2358.97	2094.03
Smp_099090	Smp_scaff000622	Contig2	alpha(1,3)fucosyltransferase, putative	CD127125	Q5C6S4_SCHJA;SJCHGC07494 protein (Fragment)		Exon 5	2109.48	2491.37	2098.66	769.861	1020.58	865.289	805.351	601.211	683.361	507.672	510.423	668.666	209.487	297.589	217.225	667.481	458.691	365.209	407.853	374.641	429.976	792.794	662.871	731.029	588.335	641.748	643.1	434.912	252.954	330.034	3303.53	2092.01	1643.15	12701.9	14313	17051.2	10600.3	15121.1	8296.15	2193.34	1935.87	665.44
				CONTIG2407	Q5C109_SCHJA;SJCHGC06374 protein (Fragment)		Exon 8/3 prime UTR	4086.72	4832.6	4588.12	853.86	1037.64	713.647	741.738	880.275	593.829	551.91	612.312	761.23	280.569	561.565	428.999	861.192	965.78	815.875	514.341	796.652	551.051	987.243	622.771	1072.87	836.159	960.257	740.125	1065.78	971.156	838.119	3660.08	2081.88	2226.26	8910.66	10780.2	7277.01	10407.4	12400.6	8767.15	1790.07	1719.05	1565.59
Smp_109500	Smp_scaff006134	Contig2	alpha-(1,3)-fucosyltransferase, putative	CONTIG2407	Q5C109_SCHJA;SJCHGC06374 protein (Fragment)		Exon1	4086.72	4832.6	4588.12	853.86	1037.64	713.647	741.738	880.275	593.829	551.91	612.312	761.23	280.569	561.565	428.999	861.192	965.78	815.875	514.341	796.652	551.051	987.243	622.771	1072.87	836.159	960.257	740.125	1065.78	971.156	838.119	3660.08	2081.88	2226.26	8910.66	10780.2	7277.01	10407.4	12400.6	8767.15	1790.07	1719.05	1565.59
Smp_129750	Smp_scaff000024	Contig6	alpha-(1,3)-fucosyltransferase, putative	No oligo
Smp_137730	Smp_scaff000060	Contig4	alpha(1,3)fucosyltransferase, putative	CD064317	Q7QBF7_ANOGA; ENSANGP00000014791 (Fragment)		Exon 2	2458.89	5757.46	3884.63	7383.74	7363.61	8091.12	11528.6	11347.7	9815.45	6788.95	4484.27	4935.66	1505.43	1430.74	1713.31	3211.32	2660.17	2748.28	4159.8	4828.74	3652.61	1868.4	1443.07	2723.61	2088.16	1404.46	1264.46	354.579	465.753	391.623	2497.96	2206.76	3126.22	14979.9	14550.1	7433.96	4994.77	4161.36	4744.2	2074.95	2477.84	2503.9
Smp_137740	Smp_scaff000060	Contig1	alpha(1,3)fucosyltransferase, putative	CD114628	Q5C6S4_SCHJA;SJCHGC07494 protein (Fragment)		Exon 2	5564.6	8284.24	10571.8	10090.4	10969.7	7939.02	4758.94	4969.63	3780.42	949.18	1016.43	1417.79	1934.54	2675.69	2303.48	2127.98	2371.51	1467.59	953.997	1769.51	1476.7	1406.68	1122.71	1599.75	998.238	1477.06	1185.29	480.895	359.325	437.464	4001.62	2161.6	2506.32	5899.11	7097.44	5172.22	6845.22	8536.42	4185.76	1960.22	2387.44	1151.67
Smp_142860	Smp_scaff000092	Contig1	alpha(1,3)fucosyltransferase, putative	No oligo
Smp_148850	Smp_scaff000127	Contig3	alpha(1,3)fucosyltransferase, putative	CD183585 (NOT UNIQUE)
				AF183577	SCHISTOSOMA MANSONI ALPHA 1-3 FUCOSYLTRANSFERASE (FUCTA) MRNA, COMPLETE CDS [POL		Exon 8	6296.15	5965.74	7228.22	1562.95	1274.89	1008.95	936.46	1244.74	870.715	7645.69	8527.67	13440.7	1084.26	1696.35	1575.21	3902.12	3189.79	3620.88	2037.01	2835.69	2674.52	6995.7	4580.94	4631.26	5116.9	5935.43	3169.61	8857.93	6220.46	6929.57	32191.4	22244.5	17529.3	35565.9	43180.6	26957.6	48925.7	55580.6	39822	24859.6	31188.6	27013.1
Smp_154410	Smp_scaff000171	Contig7	alpha(1,3)fucosyltransferase, putative	No oligo
Smp_185720	Smp_scaff009109	Contig4	alpha(1,3)fucosyltransferase, putative	CD064317	Q7QBF7_ANOGA; ENSANGP00000014791 (Fragment)		Exon 1	2458.89	5757.46	3884.63	7383.74	7363.61	8091.12	11528.6	11347.7	9815.45	6788.95	4484.27	4935.66	1505.43	1430.74	1713.31	3211.32	2660.17	2748.28	4159.8	4828.74	3652.61	1868.4	1443.07	2723.61	2088.16	1404.46	1264.46	354.579	465.753	391.623	2497.96	2206.76	3126.22	14979.9	14550.1	7433.96	4994.77	4161.36	4744.2	2074.95	2477.84	2503.9
Smp_189280	Smp_scaff013525	Contig1	alpha-(1,3)-fucosyltransferase, putative	No oligo
Smp_193870	Smp_scaff018916	Contig1	alpha-(1,3)-fucosyltransferase, putative	No oligo
Smp_194990	Smp_scaff000134	Contig5	alpha 1,3/4 fucosyltransferase Lewis 1	SMLA30G05 (Not unique)			Exon 1
				SMLA30G05 (Not unique)			Exon 2
[truncated: 2 more columns]

## Sheet: FucT RTPCR
Gene Family	Array ID	Gene DB ID	Amplicon size	Sense Primer	Antisense Primer	Annealing temp.
Fucosyltransferase	CD154939	Smp_054300	183	TTGGGCGTCTTCTGTTAAAT	TACCGGAAGGAAACAATCTG	56.2
Fucosyltransferase	AF183577	Smp_148850	158	CCAACGAGAATGCCAAGATT	ATGCACCCATTACGACTGGT	56.2

## Sheet: FucT for heatmap
Schisto FucT
									EGG (UT01)			Miracidia (UT02)			2 Day Sporocysts (UT03)			Daughter Sporocysts (UT04)			Cercariae (UT05)			3hr somules (UT06)			24hr somules (UT07)			3day somules (UT08)			6day somules (UT09)			2wk worms (UT10)			3wk worms (UT11)			5wk worms (UT12)			7wk worms (UT13)			7wk males (UT14)
Smpnumber	Smp_Scaffold	FucT cluster number	Genome ID	Array ID	Array BLASTx ID		Oligo Location (Exon, UTR, etc)	SmV2_08_870730_output	SmV2_09_870730_output	SmV2_10_870730_output	SmV2_89_870730_output	SmV2_90_870730_output	SmV2_91_870730_output	SmV2_86_870730_output	SmV2_87_870730_output	SmV2_88_870730_output	SmV2_83_870730_output	SmV2_84_870730_output	SmV2_85_870730_output	SmV2_20_870730_output	SmV2_21_870730_output	SmV2_22_870730_output	SmV2_17_870730_output	SmV2_18_870730_output	SmV2_19_870730_output	SmV2_11_870730_output	SmV2_12_870730_output	SmV2_13_870730_output	SmV2_05_870730_output	SmV2_06_870730_output	SmV2_07_870730_output	SmV2_14_870730_output	SmV2_15_870730_output	SmV2_16_870730_output	SmV2_92_870730_output	SmV2_93_870730_output	SmV2_94_870730_output	SmV2_23_870730_output	SmV2_24_870730_output	SmV2_76_870730_output	SmV2_77_870730_output	SmV2_78_870730_output	SmV2_79_870730_output	SmV2_80_870730_output	SmV2_81_870730_output	SmV2_82_870730_output	SmV2_98_870730_output	SmV2_99_870730_output	SmV2_100_870730_output
Smp_054300	Smp_scaff000144	Contig8	alpha(1,3)fucosyltransferase, putative	CD154939	Q5DFD1_SCHJA; SJCHGC09057 protein		Exon 2	3430.93	2773.93	4330.61	27374	31930.7	12331.5	29382.1	21747.2	17686.5	4669.57	5694.44	4590.61	288.257	352.736	383.655	290.613	322.499	204.718	220.258	334.518	180.629	622.921	265.142	458.562	1321.64	1517.64	1043.43	119.011	92.5059	106.034	724.776	650.408	835.336	18164.2	14136.6	12565.4	7545.9	5912.81	5892.27	3035.7	2358.97	2094.03
Smp_099090	Smp_scaff000622	Contig2	alpha(1,3)fucosyltransferase, putative	CD127125	Q5C6S4_SCHJA;SJCHGC07494 protein (Fragment)		Exon 5	2109.48	2491.37	2098.66	769.861	1020.58	865.289	805.351	601.211	683.361	507.672	510.423	668.666	209.487	297.589	217.225	667.481	458.691	365.209	407.853	374.641	429.976	792.794	662.871	731.029	588.335	641.748	643.1	434.912	252.954	330.034	3303.53	2092.01	1643.15	12701.9	14313	17051.2	10600.3	15121.1	8296.15	2193.34	1935.87	665.44
Smp_109500	Smp_scaff006134	Contig2	alpha-(1,3)-fucosyltransferase, putative	CONTIG2407	Q5C109_SCHJA;SJCHGC06374 protein (Fragment)		Exon1	4086.72	4832.6	4588.12	853.86	1037.64	713.647	741.738	880.275	593.829	551.91	612.312	761.23	280.569	561.565	428.999	861.192	965.78	815.875	514.341	796.652	551.051	987.243	622.771	1072.87	836.159	960.257	740.125	1065.78	971.156	838.119	3660.08	2081.88	2226.26	8910.66	10780.2	7277.01	10407.4	12400.6	8767.15	1790.07	1719.05	1565.59
Smp_137730	Smp_scaff000060	Contig4	alpha(1,3)fucosyltransferase, putative	CD064317	Q7QBF7_ANOGA; ENSANGP00000014791 (Fragment)		Exon 2	2458.89	5757.46	3884.63	7383.74	7363.61	8091.12	11528.6	11347.7	9815.45	6788.95	4484.27	4935.66	1505.43	1430.74	1713.31	3211.32	2660.17	2748.28	4159.8	4828.74	3652.61	1868.4	1443.07	2723.61	2088.16	1404.46	1264.46	354.579	465.753	391.623	2497.96	2206.76	3126.22	14979.9	14550.1	7433.96	4994.77	4161.36	4744.2	2074.95	2477.84	2503.9
Smp_137740	Smp_scaff000060	Contig1	alpha(1,3)fucosyltransferase, putative	CD114628	Q5C6S4_SCHJA;SJCHGC07494 protein (Fragment)		Exon 2	5564.6	8284.24	10571.8	10090.4	10969.7	7939.02	4758.94	4969.63	3780.42	949.18	1016.43	1417.79	1934.54	2675.69	2303.48	2127.98	2371.51	1467.59	953.997	1769.51	1476.7	1406.68	1122.71	1599.75	998.238	1477.06	1185.29	480.895	359.325	437.464	4001.62	2161.6	2506.32	5899.11	7097.44	5172.22	6845.22	8536.42	4185.76	1960.22	2387.44	1151.67
Smp_148850	Smp_scaff000127	Contig3	alpha(1,3)fucosyltransferase, putative	AF183577	SCHISTOSOMA MANSONI ALPHA 1-3 FUCOSYLTRANSFERASE (FUCTA) MRNA, COMPLETE CDS [POL		Exon 8	6296.15	5965.74	7228.22	1562.95	1274.89	1008.95	936.46	1244.74	870.715	7645.69	8527.67	13440.7	1084.26	1696.35	1575.21	3902.12	3189.79	3620.88	2037.01	2835.69	2674.52	6995.7	4580.94	4631.26	5116.9	5935.43	3169.61	8857.93	6220.46	6929.57	32191.4	22244.5	17529.3	35565.9	43180.6	26957.6	48925.7	55580.6	39822	24859.6	31188.6	27013.1
Smp_185720	Smp_scaff009109	Contig4	alpha(1,3)fucosyltransferase, putative	CD064317	Q7QBF7_ANOGA; ENSANGP00000014791 (Fragment)		Exon 1	2458.89	5757.46	3884.63	7383.74	7363.61	8091.12	11528.6	11347.7	9815.45	6788.95	4484.27	4935.66	1505.43	1430.74	1713.31	3211.32	2660.17	2748.28	4159.8	4828.74	3652.61	1868.4	1443.07	2723.61	2088.16	1404.46	1264.46	354.579	465.753	391.623	2497.96	2206.76	3126.22	14979.9	14550.1	7433.96	4994.77	4161.36	4744.2	2074.95	2477.84	2503.9
Array ID	Egg AV	Mir AV	MS AV	DS AV	Cerc Av	3Hr AV	24Hr Av	3Day AV	6Day AV	2Wk AV	3Wk Av	5Wk Av	7Wk Av	7Wk Male Av	7Wk Female Av
CD154939	3511.82	23878.7	22938.6	4984.87	341.55	272.61	245.135	448.875	1294.24	105.851	736.84	14955.4	6450.33	2496.23	945.678
CD127125	2233.17	885.244	696.641	562.254	241.434	497.127	404.157	728.898	624.394	339.3	2346.23	14688.7	11339.2	1598.22	13295.2
CONTIG2407	4502.48	868.384	738.614	641.817	423.711	880.949	620.681	894.295	845.513	958.351	2656.07	8989.28	10525	1691.57	12799.3
CD064317	4033.66	7612.82	10897.3	5402.96	1549.83	2873.26	4213.72	2011.7	1585.69	403.985	2610.31	12321.3	4633.44	2352.23	1104.92
CD114628	8140.2	9666.39	4503	1127.8	2304.57	1989.03	1400.07	1376.38	1220.2	425.895	2889.85	6056.26	6522.47	1833.11	2637.7
AF183577	6496.7	1282.26	1017.31	9871.36	1451.94	3570.93	2515.74	5402.63	4740.65	7335.99	23988.4	35234.7	48109.4	27687.1	11876.2
[truncated: 2 more columns]

## Sheet: Smp_054300
									EGG (UT01)			Miracidia (UT02)			2 Day Sporocysts (UT03)			Daughter Sporocysts (UT04)			Cercariae (UT05)			3hr somules (UT06)			24hr somules (UT07)			3day somules (UT08)			6day somules (UT09)			2wk worms (UT10)			3wk worms (UT11)			5wk worms (UT12)			7wk worms (UT13)			7wk males (UT14)
Smpnumber	Smp_Scaffold	FucT cluster number	Genome ID	Array ID	Array BLASTx ID		Oligo Location (Exon, UTR, etc)	SmV2_08_870730_output	SmV2_09_870730_output	SmV2_10_870730_output	SmV2_89_870730_output	SmV2_90_870730_output	SmV2_91_870730_output	SmV2_86_870730_output	SmV2_87_870730_output	SmV2_88_870730_output	SmV2_83_870730_output	SmV2_84_870730_output	SmV2_85_870730_output	SmV2_20_870730_output	SmV2_21_870730_output	SmV2_22_870730_output	SmV2_17_870730_output	SmV2_18_870730_output	SmV2_19_870730_output	SmV2_11_870730_output	SmV2_12_870730_output	SmV2_13_870730_output	SmV2_05_870730_output	SmV2_06_870730_output	SmV2_07_870730_output	SmV2_14_870730_output	SmV2_15_870730_output	SmV2_16_870730_output	SmV2_92_870730_output	SmV2_93_870730_output	SmV2_94_870730_output	SmV2_23_870730_output	SmV2_24_870730_output	SmV2_76_870730_output	SmV2_77_870730_output	SmV2_78_870730_output	SmV2_79_870730_output	SmV2_80_870730_output	SmV2_81_870730_output	SmV2_82_870730_output	SmV2_98_870730_output	SmV2_99_870730_output	SmV2_100_870730_output
Smp_054300	Smp_scaff000144	Contig8	alpha(1,3)fucosyltransferase, putative	CD154939	Q5DFD1_SCHJA; SJCHGC09057 protein		Exon 2	3430.93	2773.93	4330.61	27374	31930.7	12331.5	29382.1	21747.2	17686.5	4669.57	5694.44	4590.61	288.257	352.736	383.655	290.613	322.499	204.718	220.258	334.518	180.629	622.921	265.142	458.562	1321.64	1517.64	1043.43	119.011	92.5059	106.034	724.776	650.408	835.336	18164.2	14136.6	12565.4	7545.9	5912.81	5892.27	3035.7	2358.97	2094.03
		CD154939	Lifestage	Average Norm Cy5	STDEV
			Egg	3511.82	781.487
			Miracidia	23878.7	10256.5
			MS	22938.6	5938.13
			DS	4984.87	615.768
			Cerc	341.55	48.6728
			3Hr	272.61	60.9194
			24Hr	245.135	79.9038
			3Day	448.875	179.086
			6Day	1294.24	238.291
			2Wk	105.851	13.2537
			3Wk	736.84	93.0526
			5Wk	14955.4	2887.79
			7Wk	6450.33	948.849
			7WkMale	2496.23	485.612
			7WkFemale	945.678	95.8999
[truncated: 2 more columns]

## Sheet: Smp_099090
									EGG (UT01)			Miracidia (UT02)			2 Day Sporocysts (UT03)			Daughter Sporocysts (UT04)			Cercariae (UT05)			3hr somules (UT06)			24hr somules (UT07)			3day somules (UT08)			6day somules (UT09)			2wk worms (UT10)			3wk worms (UT11)			5wk worms (UT12)			7wk worms (UT13)			7wk males (UT14)
Smpnumber	Smp_Scaffold	FucT cluster number	Genome ID	Array ID	Array BLASTx ID		Oligo Location (Exon, UTR, etc)	SmV2_08_870730_output	SmV2_09_870730_output	SmV2_10_870730_output	SmV2_89_870730_output	SmV2_90_870730_output	SmV2_91_870730_output	SmV2_86_870730_output	SmV2_87_870730_output	SmV2_88_870730_output	SmV2_83_870730_output	SmV2_84_870730_output	SmV2_85_870730_output	SmV2_20_870730_output	SmV2_21_870730_output	SmV2_22_870730_output	SmV2_17_870730_output	SmV2_18_870730_output	SmV2_19_870730_output	SmV2_11_870730_output	SmV2_12_870730_output	SmV2_13_870730_output	SmV2_05_870730_output	SmV2_06_870730_output	SmV2_07_870730_output	SmV2_14_870730_output	SmV2_15_870730_output	SmV2_16_870730_output	SmV2_92_870730_output	SmV2_93_870730_output	SmV2_94_870730_output	SmV2_23_870730_output	SmV2_24_870730_output	SmV2_76_870730_output	SmV2_77_870730_output	SmV2_78_870730_output	SmV2_79_870730_output	SmV2_80_870730_output	SmV2_81_870730_output	SmV2_82_870730_output	SmV2_98_870730_output	SmV2_99_870730_output	SmV2_100_870730_output
Smp_099090	Smp_scaff000622	Contig2	alpha(1,3)fucosyltransferase, putative	CD127125	Q5C6S4_SCHJA;SJCHGC07494 protein (Fragment)		Exon 5	2109.48	2491.37	2098.66	769.861	1020.58	865.289	805.351	601.211	683.361	507.672	510.423	668.666	209.487	297.589	217.225	667.481	458.691	365.209	407.853	374.641	429.976	792.794	662.871	731.029	588.335	641.748	643.1	434.912	252.954	330.034	3303.53	2092.01	1643.15	12701.9	14313	17051.2	10600.3	15121.1	8296.15	2193.34	1935.87	665.44
				CONTIG2407	Q5C109_SCHJA;SJCHGC06374 protein (Fragment)		Exon 8/3 prime UTR	4086.72	4832.6	4588.12	853.86	1037.64	713.647	741.738	880.275	593.829	551.91	612.312	761.23	280.569	561.565	428.999	861.192	965.78	815.875	514.341	796.652	551.051	987.243	622.771	1072.87	836.159	960.257	740.125	1065.78	971.156	838.119	3660.08	2081.88	2226.26	8910.66	10780.2	7277.01	10407.4	12400.6	8767.15	1790.07	1719.05	1565.59
		CD127125	Lifestage	Average Norm Cy5	STDEV
			Egg	2233.17	223.673
			Miracidia	885.244	126.547
			MS	696.641	102.716
			DS	562.254	92.1658
			Cerc	241.434	48.7858
			3Hr	497.127	154.758
			24Hr	404.157	27.8524
			3Day	728.898	64.9878
			6Day	624.394	31.2357
			2Wk	339.3	91.3322
			3Wk	2346.23	858.888
			5Wk	14688.7	2198.89
			7Wk	11339.2	3471.94
			7WkMale	1598.22	818.001
			7WkFemale	13295.2	744.634
		CONTIG2407	Lifestage	Average Norm Cy5	STDEV
			Egg	4502.48	380.243
			Miracidia	868.384	162.486
			MS	738.614	143.248
			DS	641.817	107.735
			Cerc	423.711	140.573
			3Hr	880.949	76.8809
			24Hr	620.681	153.497
			3Day	894.295	239.012
			6Day	845.513	110.364
			2Wk	958.351	114.369
			3Wk	2656.07	872.484
			5Wk	8989.28	1752.91
			7Wk	10525	1819.58
			7WkMale	1691.57	114.732
			7WkFemale	12799.3	1316.56
[truncated: 2 more columns]

## Sheet: Smp_109500
									EGG (UT01)			Miracidia (UT02)			2 Day Sporocysts (UT03)			Daughter Sporocysts (UT04)			Cercariae (UT05)			3hr somules (UT06)			24hr somules (UT07)			3day somules (UT08)			6day somules (UT09)			2wk worms (UT10)			3wk worms (UT11)			5wk worms (UT12)			7wk worms (UT13)			7wk males (UT14)
Smpnumber	Smp_Scaffold	FucT cluster number	Genome ID	Array ID	Array BLASTx ID		Oligo Location (Exon, UTR, etc)	SmV2_08_870730_output	SmV2_09_870730_output	SmV2_10_870730_output	SmV2_89_870730_output	SmV2_90_870730_output	SmV2_91_870730_output	SmV2_86_870730_output	SmV2_87_870730_output	SmV2_88_870730_output	SmV2_83_870730_output	SmV2_84_870730_output	SmV2_85_870730_output	SmV2_20_870730_output	SmV2_21_870730_output	SmV2_22_870730_output	SmV2_17_870730_output	SmV2_18_870730_output	SmV2_19_870730_output	SmV2_11_870730_output	SmV2_12_870730_output	SmV2_13_870730_output	SmV2_05_870730_output	SmV2_06_870730_output	SmV2_07_870730_output	SmV2_14_870730_output	SmV2_15_870730_output	SmV2_16_870730_output	SmV2_92_870730_output	SmV2_93_870730_output	SmV2_94_870730_output	SmV2_23_870730_output	SmV2_24_870730_output	SmV2_76_870730_output	SmV2_77_870730_output	SmV2_78_870730_output	SmV2_79_870730_output	SmV2_80_870730_output	SmV2_81_870730_output	SmV2_82_870730_output	SmV2_98_870730_output	SmV2_99_870730_output	SmV2_100_870730_output
Smp_109500	Smp_scaff006134	Contig2	alpha-(1,3)-fucosyltransferase, putative	CONTIG2407	Q5C109_SCHJA;SJCHGC06374 protein (Fragment)		Exon 8/3 prime UTR	4086.72	4832.6	4588.12	853.86	1037.64	713.647	741.738	880.275	593.829	551.91	612.312	761.23	280.569	561.565	428.999	861.192	965.78	815.875	514.341	796.652	551.051	987.243	622.771	1072.87	836.159	960.257	740.125	1065.78	971.156	838.119	3660.08	2081.88	2226.26	8910.66	10780.2	7277.01	10407.4	12400.6	8767.15	1790.07	1719.05	1565.59
		CONTIG2407	Lifestage	Average Norm Cy5	STDEV
			Egg	4502.48	380.243
			Miracidia	868.384	162.486
			MS	738.614	143.248
			DS	641.817	107.735
			Cerc	423.711	140.573
			3Hr	880.949	76.8809
			24Hr	620.681	153.497
			3Day	894.295	239.012
			6Day	845.513	110.364
			2Wk	958.351	114.369
			3Wk	2656.07	872.484
			5Wk	8989.28	1752.91
			7Wk	10525	1819.58
			7WkMale	1691.57	114.732
			7WkFemale	12799.3	1316.56
[truncated: 2 more columns]

## Sheet: Smp_137730
									EGG (UT01)			Miracidia (UT02)			2 Day Sporocysts (UT03)			Daughter Sporocysts (UT04)			Cercariae (UT05)			3hr somules (UT06)			24hr somules (UT07)			3day somules (UT08)			6day somules (UT09)			2wk worms (UT10)			3wk worms (UT11)			5wk worms (UT12)			7wk worms (UT13)			7wk males (UT14)
Smpnumber	Smp_Scaffold	FucT cluster number	Genome ID	Array ID	Array BLASTx ID		Oligo Location (Exon, UTR, etc)	SmV2_08_870730_output	SmV2_09_870730_output	SmV2_10_870730_output	SmV2_89_870730_output	SmV2_90_870730_output	SmV2_91_870730_output	SmV2_86_870730_output	SmV2_87_870730_output	SmV2_88_870730_output	SmV2_83_870730_output	SmV2_84_870730_output	SmV2_85_870730_output	SmV2_20_870730_output	SmV2_21_870730_output	SmV2_22_870730_output	SmV2_17_870730_output	SmV2_18_870730_output	SmV2_19_870730_output	SmV2_11_870730_output	SmV2_12_870730_output	SmV2_13_870730_output	SmV2_05_870730_output	SmV2_06_870730_output	SmV2_07_870730_output	SmV2_14_870730_output	SmV2_15_870730_output	SmV2_16_870730_output	SmV2_92_870730_output	SmV2_93_870730_output	SmV2_94_870730_output	SmV2_23_870730_output	SmV2_24_870730_output	SmV2_76_870730_output	SmV2_77_870730_output	SmV2_78_870730_output	SmV2_79_870730_output	SmV2_80_870730_output	SmV2_81_870730_output	SmV2_82_870730_output	SmV2_98_870730_output	SmV2_99_870730_output	SmV2_100_870730_output
Smp_137730	Smp_scaff000060	Contig4	alpha(1,3)fucosyltransferase, putative	CD064317	Q7QBF7_ANOGA; ENSANGP00000014791 (Fragment)		Exon 2	2458.89	5757.46	3884.63	7383.74	7363.61	8091.12	11528.6	11347.7	9815.45	6788.95	4484.27	4935.66	1505.43	1430.74	1713.31	3211.32	2660.17	2748.28	4159.8	4828.74	3652.61	1868.4	1443.07	2723.61	2088.16	1404.46	1264.46	354.579	465.753	391.623	2497.96	2206.76	3126.22	14979.9	14550.1	7433.96	4994.77	4161.36	4744.2	2074.95	2477.84	2503.9
		CD064317	Lifestage	Average Norm Cy5	STDEV
			Egg	4033.66	1654.33
			Miracidia	7612.82	414.338
			MS	10897.3	941.234
			DS	5402.96	1221.34
			Cerc	1549.83	146.422
			3Hr	2873.26	296.07
			24Hr	4213.72	589.915
			3Day	2011.7	652.185
			6Day	1585.69	440.742
			2Wk	403.985	56.6085
			3Wk	2610.31	469.913
			5Wk	12321.3	4238.05
			7Wk	4633.44	427.598
			7WkMale	2352.23	240.484
			7WkFemale	1104.92	173.279
[truncated: 2 more columns]

## Sheet: Smp_137740 
									EGG (UT01)			Miracidia (UT02)			2 Day Sporocysts (UT03)			Daughter Sporocysts (UT04)			Cercariae (UT05)			3hr somules (UT06)			24hr somules (UT07)			3day somules (UT08)			6day somules (UT09)			2wk worms (UT10)			3wk worms (UT11)			5wk worms (UT12)			7wk worms (UT13)			7wk males (UT14)
Smpnumber	Smp_Scaffold	FucT cluster number	Genome ID	Array ID	Array BLASTx ID		Oligo Location (Exon, UTR, etc)	SmV2_08_870730_output	SmV2_09_870730_output	SmV2_10_870730_output	SmV2_89_870730_output	SmV2_90_870730_output	SmV2_91_870730_output	SmV2_86_870730_output	SmV2_87_870730_output	SmV2_88_870730_output	SmV2_83_870730_output	SmV2_84_870730_output	SmV2_85_870730_output	SmV2_20_870730_output	SmV2_21_870730_output	SmV2_22_870730_output	SmV2_17_870730_output	SmV2_18_870730_output	SmV2_19_870730_output	SmV2_11_870730_output	SmV2_12_870730_output	SmV2_13_870730_output	SmV2_05_870730_output	SmV2_06_870730_output	SmV2_07_870730_output	SmV2_14_870730_output	SmV2_15_870730_output	SmV2_16_870730_output	SmV2_92_870730_output	SmV2_93_870730_output	SmV2_94_870730_output	SmV2_23_870730_output	SmV2_24_870730_output	SmV2_76_870730_output	SmV2_77_870730_output	SmV2_78_870730_output	SmV2_79_870730_output	SmV2_80_870730_output	SmV2_81_870730_output	SmV2_82_870730_output	SmV2_98_870730_output	SmV2_99_870730_output	SmV2_100_870730_output
Smp_137740	Smp_scaff000060	Contig1	alpha(1,3)fucosyltransferase, putative	CD114628	Q5C6S4_SCHJA;SJCHGC07494 protein (Fragment)		Exon 2	5564.6	8284.24	10571.8	10090.4	10969.7	7939.02	4758.94	4969.63	3780.42	949.18	1016.43	1417.79	1934.54	2675.69	2303.48	2127.98	2371.51	1467.59	953.997	1769.51	1476.7	1406.68	1122.71	1599.75	998.238	1477.06	1185.29	480.895	359.325	437.464	4001.62	2161.6	2506.32	5899.11	7097.44	5172.22	6845.22	8536.42	4185.76	1960.22	2387.44	1151.67
		CD114628	Lifestage	Average Norm Cy5	STDEV
			Egg	8140.2	2506.68
			Miracidia	9666.39	1559.22
			MS	4503	634.577
			DS	1127.8	253.377
			Cerc	2304.57	370.576
			3Hr	1989.03	467.707
			24Hr	1400.07	413.124
			3Day	1376.38	239.959
			6Day	1220.2	241.312
			2Wk	425.895	61.6053
			3Wk	2889.85	978.132
			5Wk	6056.26	972.184
			7Wk	6522.47	2193.21
			7WkMale	1833.11	627.612
			7WkFemale	2637.7	272.046
[truncated: 2 more columns]

## Sheet: Smp_148850
									EGG (UT01)			Miracidia (UT02)			2 Day Sporocysts (UT03)			Daughter Sporocysts (UT04)			Cercariae (UT05)			3hr somules (UT06)			24hr somules (UT07)			3day somules (UT08)			6day somules (UT09)			2wk worms (UT10)			3wk worms (UT11)			5wk worms (UT12)			7wk worms (UT13)			7wk males (UT14)
Smpnumber	Smp_Scaffold	FucT cluster number	Genome ID	Array ID	Array BLASTx ID		Oligo Location (Exon, UTR, etc)	SmV2_08_870730_output	SmV2_09_870730_output	SmV2_10_870730_output	SmV2_89_870730_output	SmV2_90_870730_output	SmV2_91_870730_output	SmV2_86_870730_output	SmV2_87_870730_output	SmV2_88_870730_output	SmV2_83_870730_output	SmV2_84_870730_output	SmV2_85_870730_output	SmV2_20_870730_output	SmV2_21_870730_output	SmV2_22_870730_output	SmV2_17_870730_output	SmV2_18_870730_output	SmV2_19_870730_output	SmV2_11_870730_output	SmV2_12_870730_output	SmV2_13_870730_output	SmV2_05_870730_output	SmV2_06_870730_output	SmV2_07_870730_output	SmV2_14_870730_output	SmV2_15_870730_output	SmV2_16_870730_output	SmV2_92_870730_output	SmV2_93_870730_output	SmV2_94_870730_output	SmV2_23_870730_output	SmV2_24_870730_output	SmV2_76_870730_output	SmV2_77_870730_output	SmV2_78_870730_output	SmV2_79_870730_output	SmV2_80_870730_output	SmV2_81_870730_output	SmV2_82_870730_output	SmV2_98_870730_output	SmV2_99_870730_output	SmV2_100_870730_output
Smp_148850	Smp_scaff000127	Contig3	alpha(1,3)fucosyltransferase, putative	CD183585 (NOT UNIQUE)
				AF183577	SCHISTOSOMA MANSONI ALPHA 1-3 FUCOSYLTRANSFERASE (FUCTA) MRNA, COMPLETE CDS [POL		Exon 8	6296.15	5965.74	7228.22	1562.95	1274.89	1008.95	936.46	1244.74	870.715	7645.69	8527.67	13440.7	1084.26	1696.35	1575.21	3902.12	3189.79	3620.88	2037.01	2835.69	2674.52	6995.7	4580.94	4631.26	5116.9	5935.43	3169.61	8857.93	6220.46	6929.57	32191.4	22244.5	17529.3	35565.9	43180.6	26957.6	48925.7	55580.6	39822	24859.6	31188.6	27013.1
		AF183577	Lifestage	Average Norm Cy5	STDEV
			Egg	6496.7	654.699
			Miracidia	1282.26	277.071
			MS	1017.31	199.689
			DS	9871.36	3122.46
			Cerc	1451.94	324.128
			3Hr	3570.93	358.782
			24Hr	2515.74	422.349
			3Day	5402.63	1379.87
			6Day	4740.65	1420.78
			2Wk	7335.99	1364.9
			3Wk	23988.4	7485
			5Wk	35234.7	8116.59
			7Wk	48109.4	7910.93
			7WkMale	27687.1	3217.9
			7WkFemale	11876.2	3285.15
[truncated: 2 more columns]

[truncated: 1 more sheets: Smp_185720]
